# Supplementary material for: Testing a Social Network Intervention Using Vlogs to Promote Physical Activity Among Adolescents: A Randomized Controlled Trial
Source: Front Psychol. 2020 Jan 10;10:2913. doi: 10.3389/fpsyg.2019.02913 (PMC6967297; doi:10.3389/fpsyg.2019.02913)
Supplement: DATA SHEET S1 — Supporting data and syntax. [file Data_Sheet_1.ZIP]

Archive with 7 entries (7 files):
- Data_Vlog_intervention.csv
- Exposure.csv
- Participants_Vlog_intervention.csv
- SNI_vlogs.Rproj
- Social network intervention script.R
- Vlog_rating.csv
- Vloggers.csv
