# Supplementary material for: Testing a Social Network Intervention Using Vlogs to Promote Physical Activity Among Adolescents: A Randomized Controlled Trial
Source: Front Psychol. 2020 Jan 10;10:2913. doi: 10.3389/fpsyg.2019.02913 (PMC6967297; doi:10.3389/fpsyg.2019.02913)
Supplement: DATA SHEET S1 — Supporting data and syntax. [file Data_Sheet_1.ZIP › Data_Vlog_intervention.csv]

School	Type	Cohort	Class	Condition	Child	Sex	Age	PI	Wave	Date	Day	Participated	Steps	Minutes_MVPA	Imputed	Temp_mean	Hours_sun	Prec_hours	zBMI	Ath_cov	Ath_covC	Obin	Obin_desc_class	Obin_inj_class	PA_Motivation_identified_3	PA_Motivation_intrinsic_3	PA_Motivation_introjected_3	PA_Motivation_extrinsic_3	PA_SE_1	PA_SE_2	PA_SE_mean	PA_Enjoyment_slider_Sport_quantity	PA_Enjoyment	SexF	AgeC	WaveF	Temp_meanC	Hours_sunC	Prec_hoursC	Month	Month_num	WDay_num	Weekend	wDay	Humid	HumidC	Outliers	Condition_R	Condition_Control
33	primary	old	100	Control	282	1	12	0	7	2018-06-24	4	1	9254	14	observed	14,7	0,7	0	2,56279643527231	3,35	-0,986006010217203	1	2	1	2,5	5,33	1,33	1	6	6	6	100	6	Female	0,505939123979212	T3	2,52047141796585	-5,83789903489235	-0,893615441722346	juni	6	0	Weekend	Sunday	78	5,60207869339273	0	Control	Control
33	primary	old	100	Control	262	1	12	0	7	2018-06-21	1	1	16958	0	imputed	14,4	8,1	0	0,824882273455118	5,1	0,763993989782797	NA	NA	NA	NA	NA	NA	NA	NA	NA	NA	NA	NA	Female	0,505939123979212	T3	2,22047141796585	1,56210096510765	-0,893615441722346	juni	6	4	Week	Thursday	68	-4,39792130660727	0	Control	Control
33	primary	old	100	Control	263	0	11	0	5	2018-03-08	1	1	8710	36	observed	4,8	2	3,2	2,57778682344165	3,7	-0,636006010217202	7	7	7	4,5	4	3,67	4	4	4	4	48	3,4	Male	-0,494060876020788	T1	-7,37952858203415	-4,53789903489235	2,30638455827765	maart	3	4	Week	Thursday	84	11,6020786933927	0	Control	Control
33	primary	old	100	Control	263	0	11	0	5	2018-03-09	2	1	9333	54	observed	6,5	5,8	5,1	2,57778682344165	3,7	-0,636006010217202	7	7	7	4,5	4	3,67	4	4	4	4	48	3,4	Male	-0,494060876020788	T1	-5,67952858203415	-0,737899034892354	4,20638455827765	maart	3	5	Week	Friday	82	9,60207869339273	0	Control	Control
33	primary	old	100	Control	263	0	12	0	6	2018-05-24	1	1	9306	83	observed	18,3	3,1	0,7	2,57778682344165	3,7	-0,636006010217202	NA	NA	NA	NA	NA	NA	NA	6	6	6	48	3,4	Male	0,505939123979212	T2	6,12047141796585	-3,43789903489235	-0,193615441722346	mei	5	4	Week	Thursday	69	-3,39792130660727	0	Control	Control
33	primary	old	100	Control	263	0	12	0	6	2018-05-26	3	1	3329	61	imputed	23	11,9	0	2,57778682344165	3,7	-0,636006010217202	NA	NA	NA	NA	NA	NA	NA	6	6	6	48	3,4	Male	0,505939123979212	T2	10,8204714179658	5,36210096510765	-0,893615441722346	mei	5	6	Weekend	Saturday	59	-13,3979213066073	0	Control	Control
33	primary	old	100	Control	278	0	12	0	5	2018-03-10	3	1	12594	8	observed	11,4	1,8	6,6	-0,377221134894188	5,8	1,4639939897828	5	2	0	6	6	4	1	6	6	6	100	6	Male	0,505939123979212	T1	-0,77952858203415	-4,73789903489235	5,70638455827765	maart	3	6	Weekend	Saturday	89	16,6020786933927	0	Control	Control
33	primary	old	100	Control	278	0	12	0	5	2018-03-08	1	1	10896	46	observed	4,8	2	3,2	-0,377221134894188	5,8	1,4639939897828	5	2	0	6	6	4	1	6	6	6	100	6	Male	0,505939123979212	T1	-7,37952858203415	-4,53789903489235	2,30638455827765	maart	3	4	Week	Thursday	84	11,6020786933927	0	Control	Control
33	primary	old	100	Control	4030	1	12	0	7	2018-06-21	1	1	10795	51	imputed	14,4	8,1	0	0,474899857598415	4,5	0,163993989782798	NA	NA	NA	NA	NA	NA	NA	NA	NA	NA	NA	NA	Female	0,505939123979212	T3	2,22047141796585	1,56210096510765	-0,893615441722346	juni	6	4	Week	Thursday	68	-4,39792130660727	0	Control	Control
33	primary	old	100	Control	263	0	12	0	7	2018-06-22	2	1	2547	8	observed	13,3	1,5	0	2,57778682344165	3,7	-0,636006010217202	NA	NA	NA	NA	NA	NA	NA	NA	NA	NA	50	3,5	Male	0,505939123979212	T3	1,12047141796585	-5,03789903489235	-0,893615441722346	juni	6	5	Week	Friday	68	-4,39792130660727	0	Control	Control
33	primary	old	100	Control	278	0	12	0	6	2018-05-26	3	1	7050	18	observed	23	11,9	0	-0,377221134894188	5,8	1,4639939897828	5	1	0	6	5,67	1	1	6	6	6	100	6	Male	0,505939123979212	T2	10,8204714179658	5,36210096510765	-0,893615441722346	mei	5	6	Weekend	Saturday	59	-13,3979213066073	0	Control	Control
33	primary	old	100	Control	278	0	12	0	6	2018-05-25	2	1	18981	86	observed	20,6	10,5	0	-0,377221134894188	5,8	1,4639939897828	5	1	0	6	5,67	1	1	6	6	6	100	6	Male	0,505939123979212	T2	8,42047141796585	3,96210096510765	-0,893615441722346	mei	5	5	Week	Friday	73	0,602078693392727	0	Control	Control
33	primary	old	100	Control	278	0	12	0	6	2018-05-24	1	1	15031	90	observed	18,3	3,1	0,7	-0,377221134894188	5,8	1,4639939897828	5	1	0	6	5,67	1	1	6	6	6	100	6	Male	0,505939123979212	T2	6,12047141796585	-3,43789903489235	-0,193615441722346	mei	5	4	Week	Thursday	69	-3,39792130660727	0	Control	Control
33	primary	old	100	Control	266	0	12	0	6	2018-05-25	2	1	21430	184	observed	20,6	10,5	0	-0,0808115046607722	3,1	-1,2360060102172	NA	NA	NA	NA	NA	NA	NA	3	3	3	99	5,95	Male	0,505939123979212	T2	8,42047141796585	3,96210096510765	-0,893615441722346	mei	5	5	Week	Friday	73	0,602078693392727	0	Control	Control
33	primary	old	100	Control	278	0	12	0	7	2018-06-22	2	1	4932	28	observed	13,3	1,5	0	-0,377221134894188	5,8	1,4639939897828	NA	NA	NA	NA	NA	NA	NA	NA	NA	NA	NA	NA	Male	0,505939123979212	T3	1,12047141796585	-5,03789903489235	-0,893615441722346	juni	6	5	Week	Friday	68	-4,39792130660727	0	Control	Control
33	primary	old	100	Control	263	0	12	0	6	2018-05-25	2	1	2271	0	observed	20,6	10,5	0	2,57778682344165	3,7	-0,636006010217202	NA	NA	NA	NA	NA	NA	NA	6	6	6	48	3,4	Male	0,505939123979212	T2	8,42047141796585	3,96210096510765	-0,893615441722346	mei	5	5	Week	Friday	73	0,602078693392727	0	Control	Control
33	primary	old	100	Control	263	0	12	0	7	2018-06-23	3	1	1000	36	imputed	15,1	4,9	0	2,57778682344165	3,7	-0,636006010217202	NA	NA	NA	NA	NA	NA	NA	NA	NA	NA	50	3,5	Male	0,505939123979212	T3	2,92047141796585	-1,63789903489235	-0,893615441722346	juni	6	6	Weekend	Saturday	71	-1,39792130660727	0	Control	Control
33	primary	old	100	Control	263	0	12	0	7	2018-06-21	1	1	1000	77	imputed	14,4	8,1	0	2,57778682344165	3,7	-0,636006010217202	NA	NA	NA	NA	NA	NA	NA	NA	NA	NA	50	3,5	Male	0,505939123979212	T3	2,22047141796585	1,56210096510765	-0,893615441722346	juni	6	4	Week	Thursday	68	-4,39792130660727	0	Control	Control
33	primary	old	100	Control	266	0	12	0	5	2018-03-08	1	1	16952	124	observed	4,8	2	3,2	-0,0808115046607722	3,1	-1,2360060102172	2	2	6	5,5	6	1	1	6	6	6	58	3,9	Male	0,505939123979212	T1	-7,37952858203415	-4,53789903489235	2,30638455827765	maart	3	4	Week	Thursday	84	11,6020786933927	0	Control	Control
33	primary	old	100	Control	266	0	12	0	5	2018-03-10	3	1	22205	191	observed	11,4	1,8	6,6	-0,0808115046607722	3,1	-1,2360060102172	2	2	6	5,5	6	1	1	6	6	6	58	3,9	Male	0,505939123979212	T1	-0,77952858203415	-4,73789903489235	5,70638455827765	maart	3	6	Weekend	Saturday	89	16,6020786933927	0	Control	Control
33	primary	old	100	Control	266	0	12	0	5	2018-03-09	2	1	9654	64	observed	6,5	5,8	5,1	-0,0808115046607722	3,1	-1,2360060102172	2	2	6	5,5	6	1	1	6	6	6	58	3,9	Male	0,505939123979212	T1	-5,67952858203415	-0,737899034892354	4,20638455827765	maart	3	5	Week	Friday	82	9,60207869339273	0	Control	Control
33	primary	old	100	Control	266	0	12	0	5	2018-03-12	5	1	9863	100	observed	10,3	2,6	1,8	-0,0808115046607722	3,1	-1,2360060102172	2	2	6	5,5	6	1	1	6	6	6	58	3,9	Male	0,505939123979212	T1	-1,87952858203415	-3,93789903489235	0,906384558277654	maart	3	1	Week	Monday	85	12,6020786933927	0	Control	Control
33	primary	old	100	Control	4030	1	12	0	6	2018-05-26	3	1	2297	14	observed	23	11,9	0	0,474899857598415	4,5	0,163993989782798	NA	NA	NA	NA	NA	NA	NA	6	6	6	31	2,55	Female	0,505939123979212	T2	10,8204714179658	5,36210096510765	-0,893615441722346	mei	5	6	Weekend	Saturday	59	-13,3979213066073	0	Control	Control
33	primary	old	100	Control	266	0	12	0	6	2018-05-26	3	1	18218	0	imputed	23	11,9	0	-0,0808115046607722	3,1	-1,2360060102172	NA	NA	NA	NA	NA	NA	NA	3	3	3	99	5,95	Male	0,505939123979212	T2	10,8204714179658	5,36210096510765	-0,893615441722346	mei	5	6	Weekend	Saturday	59	-13,3979213066073	0	Control	Control
33	primary	old	100	Control	266	0	12	0	7	2018-06-22	2	1	9551	79	observed	13,3	1,5	0	-0,0808115046607722	3,1	-1,2360060102172	NA	NA	NA	NA	NA	NA	NA	NA	NA	NA	NA	NA	Male	0,505939123979212	T3	1,12047141796585	-5,03789903489235	-0,893615441722346	juni	6	5	Week	Friday	68	-4,39792130660727	0	Control	Control
33	primary	old	100	Control	266	0	12	0	7	2018-06-21	1	1	25709	18	imputed	14,4	8,1	0	-0,0808115046607722	3,1	-1,2360060102172	NA	NA	NA	NA	NA	NA	NA	NA	NA	NA	NA	NA	Male	0,505939123979212	T3	2,22047141796585	1,56210096510765	-0,893615441722346	juni	6	4	Week	Thursday	68	-4,39792130660727	0	Control	Control
33	primary	old	100	Control	263	0	11	0	5	2018-03-10	3	1	3295	72	imputed	11,4	1,8	6,6	2,57778682344165	3,7	-0,636006010217202	7	7	7	4,5	4	3,67	4	4	4	4	48	3,4	Male	-0,494060876020788	T1	-0,77952858203415	-4,73789903489235	5,70638455827765	maart	3	6	Weekend	Saturday	89	16,6020786933927	0	Control	Control
33	primary	old	100	Control	262	1	11	0	5	2018-03-08	1	1	7155	19	observed	4,8	2	3,2	0,824882273455118	5,1	0,763993989782797	7	3	1	5,5	6	1,33	1,33	4	5	4,5	85	5,25	Female	-0,494060876020788	T1	-7,37952858203415	-4,53789903489235	2,30638455827765	maart	3	4	Week	Thursday	84	11,6020786933927	0	Control	Control
33	primary	old	100	Control	262	1	11	0	5	2018-03-12	5	1	6403	11	observed	10,3	2,6	1,8	0,824882273455118	5,1	0,763993989782797	7	3	1	5,5	6	1,33	1,33	4	5	4,5	85	5,25	Female	-0,494060876020788	T1	-1,87952858203415	-3,93789903489235	0,906384558277654	maart	3	1	Week	Monday	85	12,6020786933927	0	Control	Control
33	primary	old	100	Control	262	1	11	0	5	2018-03-10	3	1	13223	82	observed	11,4	1,8	6,6	0,824882273455118	5,1	0,763993989782797	7	3	1	5,5	6	1,33	1,33	4	5	4,5	85	5,25	Female	-0,494060876020788	T1	-0,77952858203415	-4,73789903489235	5,70638455827765	maart	3	6	Weekend	Saturday	89	16,6020786933927	0	Control	Control
33	primary	old	100	Control	262	1	11	0	5	2018-03-11	4	1	2733	0	observed	10,2	2,5	1	0,824882273455118	5,1	0,763993989782797	7	3	1	5,5	6	1,33	1,33	4	5	4,5	85	5,25	Female	-0,494060876020788	T1	-1,97952858203415	-4,03789903489235	0,106384558277654	maart	3	0	Weekend	Sunday	91	18,6020786933927	0	Control	Control
33	primary	old	100	Control	262	1	11	0	5	2018-03-09	2	1	6513	17	observed	6,5	5,8	5,1	0,824882273455118	5,1	0,763993989782797	7	3	1	5,5	6	1,33	1,33	4	5	4,5	85	5,25	Female	-0,494060876020788	T1	-5,67952858203415	-0,737899034892354	4,20638455827765	maart	3	5	Week	Friday	82	9,60207869339273	0	Control	Control
33	primary	old	100	Control	262	1	12	0	6	2018-05-24	1	1	6342	0	observed	18,3	3,1	0,7	0,824882273455118	5,1	0,763993989782797	NA	NA	NA	NA	NA	NA	NA	NA	NA	NA	74	4,7	Female	0,505939123979212	T2	6,12047141796585	-3,43789903489235	-0,193615441722346	mei	5	4	Week	Thursday	69	-3,39792130660727	0	Control	Control
33	primary	old	100	Control	262	1	12	0	6	2018-05-26	3	1	4172	44	imputed	23	11,9	0	0,824882273455118	5,1	0,763993989782797	NA	NA	NA	NA	NA	NA	NA	NA	NA	NA	74	4,7	Female	0,505939123979212	T2	10,8204714179658	5,36210096510765	-0,893615441722346	mei	5	6	Weekend	Saturday	59	-13,3979213066073	0	Control	Control
33	primary	old	100	Control	262	1	12	0	6	2018-05-25	2	1	1542	0	observed	20,6	10,5	0	0,824882273455118	5,1	0,763993989782797	NA	NA	NA	NA	NA	NA	NA	NA	NA	NA	74	4,7	Female	0,505939123979212	T2	8,42047141796585	3,96210096510765	-0,893615441722346	mei	5	5	Week	Friday	73	0,602078693392727	0	Control	Control
33	primary	old	100	Control	262	1	12	0	7	2018-06-22	2	1	4934	14	observed	13,3	1,5	0	0,824882273455118	5,1	0,763993989782797	NA	NA	NA	NA	NA	NA	NA	NA	NA	NA	NA	NA	Female	0,505939123979212	T3	1,12047141796585	-5,03789903489235	-0,893615441722346	juni	6	5	Week	Friday	68	-4,39792130660727	0	Control	Control
33	primary	old	100	Control	262	1	12	0	7	2018-06-23	3	1	3515	0	imputed	15,1	4,9	0	0,824882273455118	5,1	0,763993989782797	NA	NA	NA	NA	NA	NA	NA	NA	NA	NA	NA	NA	Female	0,505939123979212	T3	2,92047141796585	-1,63789903489235	-0,893615441722346	juni	6	6	Weekend	Saturday	71	-1,39792130660727	0	Control	Control
33	primary	old	100	Control	2427	1	12	0	6	2018-05-24	1	1	1796	0	observed	18,3	3,1	0,7	1,17980818152538	4,24442424217023	-0,0915817680469724	NA	NA	NA	NA	NA	NA	NA	NA	NA	NA	NA	NA	Female	0,505939123979212	T2	6,12047141796585	-3,43789903489235	-0,193615441722346	mei	5	4	Week	Thursday	69	-3,39792130660727	0	Control	Control
33	primary	old	100	Control	2427	1	12	0	6	2018-05-25	2	1	1000	135	imputed	20,6	10,5	0	1,17980818152538	4,24442424217023	-0,0915817680469724	NA	NA	NA	NA	NA	NA	NA	NA	NA	NA	NA	NA	Female	0,505939123979212	T2	8,42047141796585	3,96210096510765	-0,893615441722346	mei	5	5	Week	Friday	73	0,602078693392727	0	Control	Control
33	primary	old	100	Control	2427	1	12	0	6	2018-05-26	3	1	7602	49	imputed	23	11,9	0	1,17980818152538	4,24442424217023	-0,0915817680469724	NA	NA	NA	NA	NA	NA	NA	NA	NA	NA	NA	NA	Female	0,505939123979212	T2	10,8204714179658	5,36210096510765	-0,893615441722346	mei	5	6	Weekend	Saturday	59	-13,3979213066073	0	Control	Control
33	primary	old	100	Control	2427	1	12	0	7	2018-06-23	3	1	3990	0	observed	15,1	4,9	0	1,17980818152538	4,24442424217023	-0,0915817680469724	NA	NA	NA	NA	NA	NA	NA	NA	NA	NA	NA	NA	Female	0,505939123979212	T3	2,92047141796585	-1,63789903489235	-0,893615441722346	juni	6	6	Weekend	Saturday	71	-1,39792130660727	0	Control	Control
33	primary	old	100	Control	2427	1	12	0	7	2018-06-22	2	1	11771	94	observed	13,3	1,5	0	1,17980818152538	4,24442424217023	-0,0915817680469724	NA	NA	NA	NA	NA	NA	NA	NA	NA	NA	NA	NA	Female	0,505939123979212	T3	1,12047141796585	-5,03789903489235	-0,893615441722346	juni	6	5	Week	Friday	68	-4,39792130660727	0	Control	Control
33	primary	old	100	Control	2427	1	12	0	7	2018-06-21	1	1	11254	0	imputed	14,4	8,1	0	1,17980818152538	4,24442424217023	-0,0915817680469724	NA	NA	NA	NA	NA	NA	NA	NA	NA	NA	NA	NA	Female	0,505939123979212	T3	2,22047141796585	1,56210096510765	-0,893615441722346	juni	6	4	Week	Thursday	68	-4,39792130660727	0	Control	Control
33	primary	old	100	Control	277	0	12	0	7	2018-06-23	3	1	7026	24	imputed	15,1	4,9	0	-0,816039789040266	3,7	-0,636006010217202	NA	NA	NA	NA	NA	NA	NA	NA	NA	NA	NA	NA	Male	0,505939123979212	T3	2,92047141796585	-1,63789903489235	-0,893615441722346	juni	6	6	Weekend	Saturday	71	-1,39792130660727	0	Control	Control
33	primary	old	100	Control	277	0	12	0	7	2018-06-22	2	1	2920	24	observed	13,3	1,5	0	-0,816039789040266	3,7	-0,636006010217202	NA	NA	NA	NA	NA	NA	NA	NA	NA	NA	NA	NA	Male	0,505939123979212	T3	1,12047141796585	-5,03789903489235	-0,893615441722346	juni	6	5	Week	Friday	68	-4,39792130660727	0	Control	Control
33	primary	old	100	Control	278	0	12	0	5	2018-03-11	4	1	4902	0	observed	10,2	2,5	1	-0,377221134894188	5,8	1,4639939897828	5	2	0	6	6	4	1	6	6	6	100	6	Male	0,505939123979212	T1	-1,97952858203415	-4,03789903489235	0,106384558277654	maart	3	0	Weekend	Sunday	91	18,6020786933927	0	Control	Control
33	primary	old	100	Control	278	0	12	0	5	2018-03-09	2	1	16251	90	observed	6,5	5,8	5,1	-0,377221134894188	5,8	1,4639939897828	5	2	0	6	6	4	1	6	6	6	100	6	Male	0,505939123979212	T1	-5,67952858203415	-0,737899034892354	4,20638455827765	maart	3	5	Week	Friday	82	9,60207869339273	0	Control	Control
33	primary	old	100	Control	272	1	12	0	6	2018-05-25	2	1	12470	38	observed	20,6	10,5	0	-0,117032298065756	5,5	1,1639939897828	4	1	0	6	6	2,67	1	6	6	6	97	5,85	Female	0,505939123979212	T2	8,42047141796585	3,96210096510765	-0,893615441722346	mei	5	5	Week	Friday	73	0,602078693392727	0	Control	Control
33	primary	old	100	Control	272	1	12	0	6	2018-05-24	1	1	13586	85	observed	18,3	3,1	0,7	-0,117032298065756	5,5	1,1639939897828	4	1	0	6	6	2,67	1	6	6	6	97	5,85	Female	0,505939123979212	T2	6,12047141796585	-3,43789903489235	-0,193615441722346	mei	5	4	Week	Thursday	69	-3,39792130660727	0	Control	Control
33	primary	old	100	Control	272	1	12	0	6	2018-05-26	3	1	15344	94	observed	23	11,9	0	-0,117032298065756	5,5	1,1639939897828	4	1	0	6	6	2,67	1	6	6	6	97	5,85	Female	0,505939123979212	T2	10,8204714179658	5,36210096510765	-0,893615441722346	mei	5	6	Weekend	Saturday	59	-13,3979213066073	0	Control	Control
33	primary	old	100	Control	4030	1	12	0	7	2018-06-22	2	1	9435	25	imputed	13,3	1,5	0	0,474899857598415	4,5	0,163993989782798	NA	NA	NA	NA	NA	NA	NA	NA	NA	NA	NA	NA	Female	0,505939123979212	T3	1,12047141796585	-5,03789903489235	-0,893615441722346	juni	6	5	Week	Friday	68	-4,39792130660727	0	Control	Control
33	primary	old	100	Control	282	1	12	0	6	2018-05-28	5	1	17545	95	observed	22,5	11,6	0,3	2,56279643527231	3,35	-0,986006010217203	2	3	0	5	5,33	1	1	6	6	6	91	5,55	Female	0,505939123979212	T2	10,3204714179658	5,06210096510765	-0,593615441722346	mei	5	1	Week	Monday	69	-3,39792130660727	0	Control	Control
33	primary	old	100	Control	282	1	12	0	6	2018-05-25	2	1	10528	24	observed	20,6	10,5	0	2,56279643527231	3,35	-0,986006010217203	2	3	0	5	5,33	1	1	6	6	6	91	5,55	Female	0,505939123979212	T2	8,42047141796585	3,96210096510765	-0,893615441722346	mei	5	5	Week	Friday	73	0,602078693392727	0	Control	Control
33	primary	old	100	Control	278	0	12	0	6	2018-05-27	4	1	6966	22	observed	20,3	3,1	1,9	-0,377221134894188	5,8	1,4639939897828	5	1	0	6	5,67	1	1	6	6	6	100	6	Male	0,505939123979212	T2	8,12047141796585	-3,43789903489235	1,00638455827765	mei	5	0	Weekend	Sunday	71	-1,39792130660727	0	Control	Control
33	primary	old	100	Control	278	0	12	0	7	2018-06-21	1	1	16123	91	imputed	14,4	8,1	0	-0,377221134894188	5,8	1,4639939897828	NA	NA	NA	NA	NA	NA	NA	NA	NA	NA	NA	NA	Male	0,505939123979212	T3	2,22047141796585	1,56210096510765	-0,893615441722346	juni	6	4	Week	Thursday	68	-4,39792130660727	0	Control	Control
33	primary	old	100	Control	282	1	12	0	7	2018-06-22	2	1	3329	0	observed	13,3	1,5	0	2,56279643527231	3,35	-0,986006010217203	1	2	1	2,5	5,33	1,33	1	6	6	6	100	6	Female	0,505939123979212	T3	1,12047141796585	-5,03789903489235	-0,893615441722346	juni	6	5	Week	Friday	68	-4,39792130660727	0	Control	Control
33	primary	old	100	Control	278	0	12	0	7	2018-06-23	3	1	3240	33	imputed	15,1	4,9	0	-0,377221134894188	5,8	1,4639939897828	NA	NA	NA	NA	NA	NA	NA	NA	NA	NA	NA	NA	Male	0,505939123979212	T3	2,92047141796585	-1,63789903489235	-0,893615441722346	juni	6	6	Weekend	Saturday	71	-1,39792130660727	0	Control	Control
33	primary	old	100	Control	266	0	12	0	5	2018-03-11	4	1	5635	10	observed	10,2	2,5	1	-0,0808115046607722	3,1	-1,2360060102172	2	2	6	5,5	6	1	1	6	6	6	58	3,9	Male	0,505939123979212	T1	-1,97952858203415	-4,03789903489235	0,106384558277654	maart	3	0	Weekend	Sunday	91	18,6020786933927	0	Control	Control
33	primary	old	100	Control	282	1	12	0	7	2018-06-25	5	1	9386	0	observed	16,5	9,6	0	2,56279643527231	3,35	-0,986006010217203	1	2	1	2,5	5,33	1,33	1	6	6	6	100	6	Female	0,505939123979212	T3	4,32047141796585	3,06210096510765	-0,893615441722346	juni	6	1	Week	Monday	75	2,60207869339273	0	Control	Control
33	primary	old	100	Control	282	1	12	0	7	2018-06-23	3	1	2820	0	observed	15,1	4,9	0	2,56279643527231	3,35	-0,986006010217203	1	2	1	2,5	5,33	1,33	1	6	6	6	100	6	Female	0,505939123979212	T3	2,92047141796585	-1,63789903489235	-0,893615441722346	juni	6	6	Weekend	Saturday	71	-1,39792130660727	0	Control	Control
33	primary	old	100	Control	283	0	11	0	5	2018-03-08	1	1	10079	48	observed	4,8	2	3,2	-1,07123728816904	3,4	-0,936006010217203	5	5	7	5,5	4	5,33	1,67	5	4	4,5	68	4,4	Male	-0,494060876020788	T1	-7,37952858203415	-4,53789903489235	2,30638455827765	maart	3	4	Week	Thursday	84	11,6020786933927	0	Control	Control
33	primary	old	100	Control	283	0	11	0	5	2018-03-12	5	1	11837	102	observed	10,3	2,6	1,8	-1,07123728816904	3,4	-0,936006010217203	5	5	7	5,5	4	5,33	1,67	5	4	4,5	68	4,4	Male	-0,494060876020788	T1	-1,87952858203415	-3,93789903489235	0,906384558277654	maart	3	1	Week	Monday	85	12,6020786933927	0	Control	Control
33	primary	old	100	Control	266	0	12	0	6	2018-05-24	1	1	27524	225	observed	18,3	3,1	0,7	-0,0808115046607722	3,1	-1,2360060102172	NA	NA	NA	NA	NA	NA	NA	3	3	3	99	5,95	Male	0,505939123979212	T2	6,12047141796585	-3,43789903489235	-0,193615441722346	mei	5	4	Week	Thursday	69	-3,39792130660727	1	Control	Control
33	primary	old	100	Control	283	0	11	0	5	2018-03-10	3	1	6271	11	observed	11,4	1,8	6,6	-1,07123728816904	3,4	-0,936006010217203	5	5	7	5,5	4	5,33	1,67	5	4	4,5	68	4,4	Male	-0,494060876020788	T1	-0,77952858203415	-4,73789903489235	5,70638455827765	maart	3	6	Weekend	Saturday	89	16,6020786933927	0	Control	Control
33	primary	old	100	Control	2425	0	12	0	5	2018-03-08	1	1	5723	39	observed	4,8	2	3,2	-0,53414774764505	4	-0,336006010217202	NA	NA	NA	3,5	5,33	1	1	5	5	5	55	3,75	Male	0,505939123979212	T1	-7,37952858203415	-4,53789903489235	2,30638455827765	maart	3	4	Week	Thursday	84	11,6020786933927	0	Control	Control
33	primary	old	100	Control	2425	0	12	0	5	2018-03-09	2	1	5716	51	observed	6,5	5,8	5,1	-0,53414774764505	4	-0,336006010217202	NA	NA	NA	3,5	5,33	1	1	5	5	5	55	3,75	Male	0,505939123979212	T1	-5,67952858203415	-0,737899034892354	4,20638455827765	maart	3	5	Week	Friday	82	9,60207869339273	0	Control	Control
33	primary	old	100	Control	2425	0	12	0	5	2018-03-11	4	1	1445	12	observed	10,2	2,5	1	-0,53414774764505	4	-0,336006010217202	NA	NA	NA	3,5	5,33	1	1	5	5	5	55	3,75	Male	0,505939123979212	T1	-1,97952858203415	-4,03789903489235	0,106384558277654	maart	3	0	Weekend	Sunday	91	18,6020786933927	0	Control	Control
33	primary	old	100	Control	2425	0	12	0	5	2018-03-10	3	1	1000	0	imputed	11,4	1,8	6,6	-0,53414774764505	4	-0,336006010217202	NA	NA	NA	3,5	5,33	1	1	5	5	5	55	3,75	Male	0,505939123979212	T1	-0,77952858203415	-4,73789903489235	5,70638455827765	maart	3	6	Weekend	Saturday	89	16,6020786933927	0	Control	Control
33	primary	old	100	Control	2425	0	12	0	6	2018-05-26	3	1	7488	83	imputed	23	11,9	0	-0,53414774764505	4	-0,336006010217202	NA	NA	NA	NA	NA	NA	NA	NA	NA	NA	51	3,55	Male	0,505939123979212	T2	10,8204714179658	5,36210096510765	-0,893615441722346	mei	5	6	Weekend	Saturday	59	-13,3979213066073	0	Control	Control
33	primary	old	100	Control	2425	0	12	0	6	2018-05-25	2	1	17654	27	imputed	20,6	10,5	0	-0,53414774764505	4	-0,336006010217202	NA	NA	NA	NA	NA	NA	NA	NA	NA	NA	51	3,55	Male	0,505939123979212	T2	8,42047141796585	3,96210096510765	-0,893615441722346	mei	5	5	Week	Friday	73	0,602078693392727	0	Control	Control
33	primary	old	100	Control	2425	0	12	0	6	2018-05-24	1	1	6433	47	observed	18,3	3,1	0,7	-0,53414774764505	4	-0,336006010217202	NA	NA	NA	NA	NA	NA	NA	NA	NA	NA	51	3,55	Male	0,505939123979212	T2	6,12047141796585	-3,43789903489235	-0,193615441722346	mei	5	4	Week	Thursday	69	-3,39792130660727	0	Control	Control
33	primary	old	100	Control	2425	0	12	0	7	2018-06-21	1	1	10383	46	imputed	14,4	8,1	0	-0,53414774764505	4	-0,336006010217202	NA	NA	NA	NA	NA	NA	NA	NA	NA	NA	NA	NA	Male	0,505939123979212	T3	2,22047141796585	1,56210096510765	-0,893615441722346	juni	6	4	Week	Thursday	68	-4,39792130660727	0	Control	Control
33	primary	old	100	Control	2425	0	12	0	7	2018-06-22	2	1	2057	0	observed	13,3	1,5	0	-0,53414774764505	4	-0,336006010217202	NA	NA	NA	NA	NA	NA	NA	NA	NA	NA	NA	NA	Male	0,505939123979212	T3	1,12047141796585	-5,03789903489235	-0,893615441722346	juni	6	5	Week	Friday	68	-4,39792130660727	0	Control	Control
33	primary	old	100	Control	2425	0	12	0	7	2018-06-23	3	1	10039	21	imputed	15,1	4,9	0	-0,53414774764505	4	-0,336006010217202	NA	NA	NA	NA	NA	NA	NA	NA	NA	NA	NA	NA	Male	0,505939123979212	T3	2,92047141796585	-1,63789903489235	-0,893615441722346	juni	6	6	Weekend	Saturday	71	-1,39792130660727	0	Control	Control
33	primary	old	100	Control	2427	1	12	0	5	2018-03-08	1	1	9038	11	observed	4,8	2	3,2	1,17980818152538	4,24442424217023	-0,0915817680469724	NA	NA	NA	3,5	4,33	1,67	1,33	6	6	6	83	5,15	Female	0,505939123979212	T1	-7,37952858203415	-4,53789903489235	2,30638455827765	maart	3	4	Week	Thursday	84	11,6020786933927	0	Control	Control
33	primary	old	100	Control	2427	1	12	0	5	2018-03-10	3	1	1000	99	imputed	11,4	1,8	6,6	1,17980818152538	4,24442424217023	-0,0915817680469724	NA	NA	NA	3,5	4,33	1,67	1,33	6	6	6	83	5,15	Female	0,505939123979212	T1	-0,77952858203415	-4,73789903489235	5,70638455827765	maart	3	6	Weekend	Saturday	89	16,6020786933927	0	Control	Control
33	primary	old	100	Control	2427	1	12	0	5	2018-03-09	2	1	3729	8	observed	6,5	5,8	5,1	1,17980818152538	4,24442424217023	-0,0915817680469724	NA	NA	NA	3,5	4,33	1,67	1,33	6	6	6	83	5,15	Female	0,505939123979212	T1	-5,67952858203415	-0,737899034892354	4,20638455827765	maart	3	5	Week	Friday	82	9,60207869339273	0	Control	Control
33	primary	old	100	Control	271	0	12	0	7	2018-06-23	3	1	8327	35	observed	15,1	4,9	0	1,44794595526636	5	0,663993989782798	NA	NA	NA	NA	NA	NA	NA	6	2	4	88	5,4	Male	0,505939123979212	T3	2,92047141796585	-1,63789903489235	-0,893615441722346	juni	6	6	Weekend	Saturday	71	-1,39792130660727	0	Control	Control
33	primary	old	100	Control	271	0	12	0	7	2018-06-21	1	1	15620	72	imputed	14,4	8,1	0	1,44794595526636	5	0,663993989782798	NA	NA	NA	NA	NA	NA	NA	6	2	4	88	5,4	Male	0,505939123979212	T3	2,22047141796585	1,56210096510765	-0,893615441722346	juni	6	4	Week	Thursday	68	-4,39792130660727	0	Control	Control
33	primary	old	100	Control	271	0	12	0	7	2018-06-24	4	1	10327	56	observed	14,7	0,7	0	1,44794595526636	5	0,663993989782798	NA	NA	NA	NA	NA	NA	NA	6	2	4	88	5,4	Male	0,505939123979212	T3	2,52047141796585	-5,83789903489235	-0,893615441722346	juni	6	0	Weekend	Sunday	78	5,60207869339273	0	Control	Control
33	primary	old	100	Control	272	1	11	0	5	2018-03-12	5	1	14056	92	observed	10,3	2,6	1,8	-0,117032298065756	5,5	1,1639939897828	3	2	1	6	6	3,33	1	5	6	5,5	100	6	Female	-0,494060876020788	T1	-1,87952858203415	-3,93789903489235	0,906384558277654	maart	3	1	Week	Monday	85	12,6020786933927	0	Control	Control
33	primary	old	100	Control	272	1	11	0	5	2018-03-09	2	1	9088	18	observed	6,5	5,8	5,1	-0,117032298065756	5,5	1,1639939897828	3	2	1	6	6	3,33	1	5	6	5,5	100	6	Female	-0,494060876020788	T1	-5,67952858203415	-0,737899034892354	4,20638455827765	maart	3	5	Week	Friday	82	9,60207869339273	0	Control	Control
33	primary	old	100	Control	272	1	11	0	5	2018-03-10	3	1	17942	106	observed	11,4	1,8	6,6	-0,117032298065756	5,5	1,1639939897828	3	2	1	6	6	3,33	1	5	6	5,5	100	6	Female	-0,494060876020788	T1	-0,77952858203415	-4,73789903489235	5,70638455827765	maart	3	6	Weekend	Saturday	89	16,6020786933927	0	Control	Control
33	primary	old	100	Control	272	1	11	0	5	2018-03-11	4	1	5937	7	observed	10,2	2,5	1	-0,117032298065756	5,5	1,1639939897828	3	2	1	6	6	3,33	1	5	6	5,5	100	6	Female	-0,494060876020788	T1	-1,97952858203415	-4,03789903489235	0,106384558277654	maart	3	0	Weekend	Sunday	91	18,6020786933927	0	Control	Control
33	primary	old	100	Control	272	1	11	0	5	2018-03-08	1	1	12427	51	observed	4,8	2	3,2	-0,117032298065756	5,5	1,1639939897828	3	2	1	6	6	3,33	1	5	6	5,5	100	6	Female	-0,494060876020788	T1	-7,37952858203415	-4,53789903489235	2,30638455827765	maart	3	4	Week	Thursday	84	11,6020786933927	0	Control	Control
33	primary	old	100	Control	272	1	12	0	6	2018-05-28	5	1	14448	103	observed	22,5	11,6	0,3	-0,117032298065756	5,5	1,1639939897828	4	1	0	6	6	2,67	1	6	6	6	97	5,85	Female	0,505939123979212	T2	10,3204714179658	5,06210096510765	-0,593615441722346	mei	5	1	Week	Monday	69	-3,39792130660727	0	Control	Control
33	primary	old	100	Control	272	1	12	0	6	2018-05-27	4	1	8146	23	observed	20,3	3,1	1,9	-0,117032298065756	5,5	1,1639939897828	4	1	0	6	6	2,67	1	6	6	6	97	5,85	Female	0,505939123979212	T2	8,12047141796585	-3,43789903489235	1,00638455827765	mei	5	0	Weekend	Sunday	71	-1,39792130660727	0	Control	Control
33	primary	old	100	Control	268	0	11	0	5	2018-03-09	2	1	11696	91	observed	6,5	5,8	5,1	0,0606596762101632	4,13487132934652	-0,201134680870681	NA	NA	NA	6	6	1	1	NA	NA	NA	100	6	Male	-0,494060876020788	T1	-5,67952858203415	-0,737899034892354	4,20638455827765	maart	3	5	Week	Friday	82	9,60207869339273	0	Control	Control
33	primary	old	100	Control	268	0	11	0	5	2018-03-08	1	1	6282	42	observed	4,8	2	3,2	0,0606596762101632	4,13487132934652	-0,201134680870681	NA	NA	NA	6	6	1	1	NA	NA	NA	100	6	Male	-0,494060876020788	T1	-7,37952858203415	-4,53789903489235	2,30638455827765	maart	3	4	Week	Thursday	84	11,6020786933927	0	Control	Control
33	primary	old	100	Control	268	0	11	0	5	2018-03-10	3	1	11304	78	observed	11,4	1,8	6,6	0,0606596762101632	4,13487132934652	-0,201134680870681	NA	NA	NA	6	6	1	1	NA	NA	NA	100	6	Male	-0,494060876020788	T1	-0,77952858203415	-4,73789903489235	5,70638455827765	maart	3	6	Weekend	Saturday	89	16,6020786933927	0	Control	Control
33	primary	old	100	Control	272	1	12	0	7	2018-06-23	3	1	9076	53	observed	15,1	4,9	0	-0,117032298065756	5,5	1,1639939897828	NA	NA	NA	NA	NA	NA	NA	NA	NA	NA	100	6	Female	0,505939123979212	T3	2,92047141796585	-1,63789903489235	-0,893615441722346	juni	6	6	Weekend	Saturday	71	-1,39792130660727	0	Control	Control
33	primary	old	100	Control	272	1	12	0	7	2018-06-22	2	1	6284	32	observed	13,3	1,5	0	-0,117032298065756	5,5	1,1639939897828	NA	NA	NA	NA	NA	NA	NA	NA	NA	NA	100	6	Female	0,505939123979212	T3	1,12047141796585	-5,03789903489235	-0,893615441722346	juni	6	5	Week	Friday	68	-4,39792130660727	0	Control	Control
33	primary	old	100	Control	272	1	12	0	7	2018-06-25	5	1	18188	118	observed	16,5	9,6	0	-0,117032298065756	5,5	1,1639939897828	NA	NA	NA	NA	NA	NA	NA	NA	NA	NA	100	6	Female	0,505939123979212	T3	4,32047141796585	3,06210096510765	-0,893615441722346	juni	6	1	Week	Monday	75	2,60207869339273	0	Control	Control
33	primary	old	100	Control	268	0	12	0	7	2018-06-22	2	1	2633	17	observed	13,3	1,5	0	0,0606596762101632	4,13487132934652	-0,201134680870681	NA	NA	NA	NA	NA	NA	NA	NA	NA	NA	NA	NA	Male	0,505939123979212	T3	1,12047141796585	-5,03789903489235	-0,893615441722346	juni	6	5	Week	Friday	68	-4,39792130660727	0	Control	Control
33	primary	old	100	Control	1317	0	11	0	5	2018-03-09	2	1	8656	37	observed	6,5	5,8	5,1	-0,759318665325229	5,5	1,1639939897828	7	0	0	4	4,67	1	1	1	1	1	100	6	Male	-0,494060876020788	T1	-5,67952858203415	-0,737899034892354	4,20638455827765	maart	3	5	Week	Friday	82	9,60207869339273	0	Control	Control
33	primary	old	100	Control	282	1	12	0	7	2018-06-21	1	1	10840	17	imputed	14,4	8,1	0	2,56279643527231	3,35	-0,986006010217203	1	2	1	2,5	5,33	1,33	1	6	6	6	100	6	Female	0,505939123979212	T3	2,22047141796585	1,56210096510765	-0,893615441722346	juni	6	4	Week	Thursday	68	-4,39792130660727	0	Control	Control
33	primary	old	100	Control	275	0	11	0	6	2018-05-25	2	1	17909	0	imputed	20,6	10,5	0	0,950341930587551	5,35	1,0139939897828	6	7	7	6	6	1	1	5	5	5	100	6	Male	-0,494060876020788	T2	8,42047141796585	3,96210096510765	-0,893615441722346	mei	5	5	Week	Friday	73	0,602078693392727	0	Control	Control
33	primary	old	100	Control	275	0	11	0	6	2018-05-26	3	1	18452	10	imputed	23	11,9	0	0,950341930587551	5,35	1,0139939897828	6	7	7	6	6	1	1	5	5	5	100	6	Male	-0,494060876020788	T2	10,8204714179658	5,36210096510765	-0,893615441722346	mei	5	6	Weekend	Saturday	59	-13,3979213066073	0	Control	Control
33	primary	old	100	Control	275	0	12	0	7	2018-06-22	2	1	4729	94	imputed	13,3	1,5	0	0,950341930587551	5,35	1,0139939897828	7	7	7	3,5	2,67	1	1	6	6	6	100	6	Male	0,505939123979212	T3	1,12047141796585	-5,03789903489235	-0,893615441722346	juni	6	5	Week	Friday	68	-4,39792130660727	0	Control	Control
33	primary	old	100	Control	275	0	12	0	7	2018-06-23	3	1	17316	115	imputed	15,1	4,9	0	0,950341930587551	5,35	1,0139939897828	7	7	7	3,5	2,67	1	1	6	6	6	100	6	Male	0,505939123979212	T3	2,92047141796585	-1,63789903489235	-0,893615441722346	juni	6	6	Weekend	Saturday	71	-1,39792130660727	0	Control	Control
33	primary	old	100	Control	275	0	12	0	7	2018-06-21	1	1	14613	16	imputed	14,4	8,1	0	0,950341930587551	5,35	1,0139939897828	7	7	7	3,5	2,67	1	1	6	6	6	100	6	Male	0,505939123979212	T3	2,22047141796585	1,56210096510765	-0,893615441722346	juni	6	4	Week	Thursday	68	-4,39792130660727	0	Control	Control
33	primary	old	100	Control	276	1	12	0	5	2018-03-12	5	1	1018	0	observed	10,3	2,6	1,8	0,445962394657209	4,5	0,163993989782798	2	3	1	3,5	4,33	2,67	1,67	5	4	4,5	85	5,25	Female	0,505939123979212	T1	-1,87952858203415	-3,93789903489235	0,906384558277654	maart	3	1	Week	Monday	85	12,6020786933927	0	Control	Control
33	primary	old	100	Control	276	1	12	0	5	2018-03-09	2	1	2436	0	imputed	6,5	5,8	5,1	0,445962394657209	4,5	0,163993989782798	2	3	1	3,5	4,33	2,67	1,67	5	4	4,5	85	5,25	Female	0,505939123979212	T1	-5,67952858203415	-0,737899034892354	4,20638455827765	maart	3	5	Week	Friday	82	9,60207869339273	0	Control	Control
33	primary	old	100	Control	276	1	12	0	5	2018-03-08	1	1	1857	0	observed	4,8	2	3,2	0,445962394657209	4,5	0,163993989782798	2	3	1	3,5	4,33	2,67	1,67	5	4	4,5	85	5,25	Female	0,505939123979212	T1	-7,37952858203415	-4,53789903489235	2,30638455827765	maart	3	4	Week	Thursday	84	11,6020786933927	0	Control	Control
33	primary	old	100	Control	276	1	12	0	5	2018-03-10	3	1	3065	0	imputed	11,4	1,8	6,6	0,445962394657209	4,5	0,163993989782798	2	3	1	3,5	4,33	2,67	1,67	5	4	4,5	85	5,25	Female	0,505939123979212	T1	-0,77952858203415	-4,73789903489235	5,70638455827765	maart	3	6	Weekend	Saturday	89	16,6020786933927	0	Control	Control
33	primary	old	100	Control	276	1	12	0	6	2018-05-26	3	1	3813	47	imputed	23	11,9	0	0,445962394657209	4,5	0,163993989782798	NA	NA	NA	NA	NA	NA	NA	NA	NA	NA	86	5,3	Female	0,505939123979212	T2	10,8204714179658	5,36210096510765	-0,893615441722346	mei	5	6	Weekend	Saturday	59	-13,3979213066073	0	Control	Control
33	primary	old	100	Control	276	1	12	0	6	2018-05-24	1	1	5907	9	observed	18,3	3,1	0,7	0,445962394657209	4,5	0,163993989782798	NA	NA	NA	NA	NA	NA	NA	NA	NA	NA	86	5,3	Female	0,505939123979212	T2	6,12047141796585	-3,43789903489235	-0,193615441722346	mei	5	4	Week	Thursday	69	-3,39792130660727	0	Control	Control
33	primary	old	100	Control	276	1	12	0	6	2018-05-25	2	1	6647	3	imputed	20,6	10,5	0	0,445962394657209	4,5	0,163993989782798	NA	NA	NA	NA	NA	NA	NA	NA	NA	NA	86	5,3	Female	0,505939123979212	T2	8,42047141796585	3,96210096510765	-0,893615441722346	mei	5	5	Week	Friday	73	0,602078693392727	0	Control	Control
33	primary	old	100	Control	276	1	12	0	7	2018-06-22	2	1	2526	0	observed	13,3	1,5	0	0,445962394657209	4,5	0,163993989782798	NA	NA	NA	NA	NA	NA	NA	NA	NA	NA	89	5,45	Female	0,505939123979212	T3	1,12047141796585	-5,03789903489235	-0,893615441722346	juni	6	5	Week	Friday	68	-4,39792130660727	0	Control	Control
33	primary	old	100	Control	276	1	12	0	7	2018-06-23	3	1	7140	37	observed	15,1	4,9	0	0,445962394657209	4,5	0,163993989782798	NA	NA	NA	NA	NA	NA	NA	NA	NA	NA	89	5,45	Female	0,505939123979212	T3	2,92047141796585	-1,63789903489235	-0,893615441722346	juni	6	6	Weekend	Saturday	71	-1,39792130660727	0	Control	Control
33	primary	old	100	Control	276	1	12	0	7	2018-06-21	1	1	8200	0	imputed	14,4	8,1	0	0,445962394657209	4,5	0,163993989782798	NA	NA	NA	NA	NA	NA	NA	NA	NA	NA	89	5,45	Female	0,505939123979212	T3	2,22047141796585	1,56210096510765	-0,893615441722346	juni	6	4	Week	Thursday	68	-4,39792130660727	0	Control	Control
33	primary	old	100	Control	277	0	12	0	5	2018-03-08	1	1	19699	184	observed	4,8	2	3,2	-0,816039789040266	3,7	-0,636006010217202	3	2	0	5	6	1	1	2	2	2	100	6	Male	0,505939123979212	T1	-7,37952858203415	-4,53789903489235	2,30638455827765	maart	3	4	Week	Thursday	84	11,6020786933927	0	Control	Control
33	primary	old	100	Control	277	0	12	0	5	2018-03-09	2	1	10354	70	observed	6,5	5,8	5,1	-0,816039789040266	3,7	-0,636006010217202	3	2	0	5	6	1	1	2	2	2	100	6	Male	0,505939123979212	T1	-5,67952858203415	-0,737899034892354	4,20638455827765	maart	3	5	Week	Friday	82	9,60207869339273	0	Control	Control
33	primary	old	100	Control	277	0	12	0	5	2018-03-10	3	1	13780	91	observed	11,4	1,8	6,6	-0,816039789040266	3,7	-0,636006010217202	3	2	0	5	6	1	1	2	2	2	100	6	Male	0,505939123979212	T1	-0,77952858203415	-4,73789903489235	5,70638455827765	maart	3	6	Weekend	Saturday	89	16,6020786933927	0	Control	Control
33	primary	old	100	Control	277	0	12	0	5	2018-03-11	4	1	18212	128	observed	10,2	2,5	1	-0,816039789040266	3,7	-0,636006010217202	3	2	0	5	6	1	1	2	2	2	100	6	Male	0,505939123979212	T1	-1,97952858203415	-4,03789903489235	0,106384558277654	maart	3	0	Weekend	Sunday	91	18,6020786933927	0	Control	Control
33	primary	old	100	Control	277	0	12	0	5	2018-03-12	5	1	9473	50	observed	10,3	2,6	1,8	-0,816039789040266	3,7	-0,636006010217202	3	2	0	5	6	1	1	2	2	2	100	6	Male	0,505939123979212	T1	-1,87952858203415	-3,93789903489235	0,906384558277654	maart	3	1	Week	Monday	85	12,6020786933927	0	Control	Control
33	primary	old	100	Control	277	0	12	0	6	2018-05-27	4	1	6412	17	observed	20,3	3,1	1,9	-0,816039789040266	3,7	-0,636006010217202	6	0	0	1	1	1	1	3	3	3	100	6	Male	0,505939123979212	T2	8,12047141796585	-3,43789903489235	1,00638455827765	mei	5	0	Weekend	Sunday	71	-1,39792130660727	0	Control	Control
33	primary	old	100	Control	277	0	12	0	6	2018-05-26	3	1	4906	46	observed	23	11,9	0	-0,816039789040266	3,7	-0,636006010217202	6	0	0	1	1	1	1	3	3	3	100	6	Male	0,505939123979212	T2	10,8204714179658	5,36210096510765	-0,893615441722346	mei	5	6	Weekend	Saturday	59	-13,3979213066073	0	Control	Control
33	primary	old	100	Control	277	0	12	0	6	2018-05-24	1	1	11756	97	observed	18,3	3,1	0,7	-0,816039789040266	3,7	-0,636006010217202	6	0	0	1	1	1	1	3	3	3	100	6	Male	0,505939123979212	T2	6,12047141796585	-3,43789903489235	-0,193615441722346	mei	5	4	Week	Thursday	69	-3,39792130660727	0	Control	Control
33	primary	old	100	Control	277	0	12	0	6	2018-05-25	2	1	14518	68	observed	20,6	10,5	0	-0,816039789040266	3,7	-0,636006010217202	6	0	0	1	1	1	1	3	3	3	100	6	Male	0,505939123979212	T2	8,42047141796585	3,96210096510765	-0,893615441722346	mei	5	5	Week	Friday	73	0,602078693392727	0	Control	Control
33	primary	old	100	Control	277	0	12	0	6	2018-05-28	5	1	12925	97	observed	22,5	11,6	0,3	-0,816039789040266	3,7	-0,636006010217202	6	0	0	1	1	1	1	3	3	3	100	6	Male	0,505939123979212	T2	10,3204714179658	5,06210096510765	-0,593615441722346	mei	5	1	Week	Monday	69	-3,39792130660727	0	Control	Control
33	primary	old	100	Control	277	0	12	0	7	2018-06-21	1	1	21975	81	imputed	14,4	8,1	0	-0,816039789040266	3,7	-0,636006010217202	NA	NA	NA	NA	NA	NA	NA	NA	NA	NA	NA	NA	Male	0,505939123979212	T3	2,22047141796585	1,56210096510765	-0,893615441722346	juni	6	4	Week	Thursday	68	-4,39792130660727	0	Control	Control
33	primary	old	100	Control	267	1	11	0	7	2018-06-21	1	1	11676	26	imputed	14,4	8,1	0	2,23196248447571	4,45	0,113993989782798	4	4	2	5	5	1	1	4	4	4	61	4,05	Female	-0,494060876020788	T3	2,22047141796585	1,56210096510765	-0,893615441722346	juni	6	4	Week	Thursday	68	-4,39792130660727	0	Control	Control
33	primary	old	100	Control	267	1	11	0	7	2018-06-23	3	1	5909	0	imputed	15,1	4,9	0	2,23196248447571	4,45	0,113993989782798	4	4	2	5	5	1	1	4	4	4	61	4,05	Female	-0,494060876020788	T3	2,92047141796585	-1,63789903489235	-0,893615441722346	juni	6	6	Weekend	Saturday	71	-1,39792130660727	0	Control	Control
33	primary	old	100	Control	282	1	11	0	5	2018-03-11	4	1	1503	0	observed	10,2	2,5	1	2,56279643527231	3,35	-0,986006010217203	3	3	0	4	6	1	1	6	6	6	100	6	Female	-0,494060876020788	T1	-1,97952858203415	-4,03789903489235	0,106384558277654	maart	3	0	Weekend	Sunday	91	18,6020786933927	0	Control	Control
33	primary	old	100	Control	282	1	11	0	5	2018-03-12	5	1	3826	34	observed	10,3	2,6	1,8	2,56279643527231	3,35	-0,986006010217203	3	3	0	4	6	1	1	6	6	6	100	6	Female	-0,494060876020788	T1	-1,87952858203415	-3,93789903489235	0,906384558277654	maart	3	1	Week	Monday	85	12,6020786933927	0	Control	Control
33	primary	old	100	Control	282	1	11	0	5	2018-03-10	3	1	3643	0	observed	11,4	1,8	6,6	2,56279643527231	3,35	-0,986006010217203	3	3	0	4	6	1	1	6	6	6	100	6	Female	-0,494060876020788	T1	-0,77952858203415	-4,73789903489235	5,70638455827765	maart	3	6	Weekend	Saturday	89	16,6020786933927	0	Control	Control
33	primary	old	100	Control	268	0	12	0	6	2018-05-24	1	1	5824	32	observed	18,3	3,1	0,7	0,0606596762101632	4,13487132934652	-0,201134680870681	NA	NA	NA	NA	NA	NA	NA	NA	NA	NA	100	6	Male	0,505939123979212	T2	6,12047141796585	-3,43789903489235	-0,193615441722346	mei	5	4	Week	Thursday	69	-3,39792130660727	0	Control	Control
33	primary	old	100	Control	268	0	12	0	6	2018-05-26	3	1	18540	102	imputed	23	11,9	0	0,0606596762101632	4,13487132934652	-0,201134680870681	NA	NA	NA	NA	NA	NA	NA	NA	NA	NA	100	6	Male	0,505939123979212	T2	10,8204714179658	5,36210096510765	-0,893615441722346	mei	5	6	Weekend	Saturday	59	-13,3979213066073	0	Control	Control
33	primary	old	100	Control	268	0	12	0	6	2018-05-25	2	1	18234	126	imputed	20,6	10,5	0	0,0606596762101632	4,13487132934652	-0,201134680870681	NA	NA	NA	NA	NA	NA	NA	NA	NA	NA	100	6	Male	0,505939123979212	T2	8,42047141796585	3,96210096510765	-0,893615441722346	mei	5	5	Week	Friday	73	0,602078693392727	0	Control	Control
33	primary	old	100	Control	268	0	12	0	7	2018-06-23	3	1	1000	117	imputed	15,1	4,9	0	0,0606596762101632	4,13487132934652	-0,201134680870681	NA	NA	NA	NA	NA	NA	NA	NA	NA	NA	NA	NA	Male	0,505939123979212	T3	2,92047141796585	-1,63789903489235	-0,893615441722346	juni	6	6	Weekend	Saturday	71	-1,39792130660727	0	Control	Control
33	primary	old	100	Control	1317	0	11	0	5	2018-03-08	1	1	10793	39	observed	4,8	2	3,2	-0,759318665325229	5,5	1,1639939897828	7	0	0	4	4,67	1	1	1	1	1	100	6	Male	-0,494060876020788	T1	-7,37952858203415	-4,53789903489235	2,30638455827765	maart	3	4	Week	Thursday	84	11,6020786933927	0	Control	Control
33	primary	old	100	Control	1317	0	11	0	5	2018-03-10	3	1	10280	56	imputed	11,4	1,8	6,6	-0,759318665325229	5,5	1,1639939897828	7	0	0	4	4,67	1	1	1	1	1	100	6	Male	-0,494060876020788	T1	-0,77952858203415	-4,73789903489235	5,70638455827765	maart	3	6	Weekend	Saturday	89	16,6020786933927	0	Control	Control
33	primary	old	100	Control	1317	0	12	0	6	2018-05-26	3	1	13051	77	observed	23	11,9	0	-0,759318665325229	5,5	1,1639939897828	7	4	0	6	6	2,67	2,67	6	6	6	100	6	Male	0,505939123979212	T2	10,8204714179658	5,36210096510765	-0,893615441722346	mei	5	6	Weekend	Saturday	59	-13,3979213066073	0	Control	Control
33	primary	old	100	Control	280	1	12	0	5	2018-03-12	5	1	12155	88	observed	10,3	2,6	1,8	-0,0285214982740484	5,4	1,0639939897828	3	6	1	5	5,67	1	1	6	6	6	98	5,9	Female	0,505939123979212	T1	-1,87952858203415	-3,93789903489235	0,906384558277654	maart	3	1	Week	Monday	85	12,6020786933927	0	Control	Control
33	primary	old	100	Control	280	1	12	0	5	2018-03-09	2	1	10537	31	observed	6,5	5,8	5,1	-0,0285214982740484	5,4	1,0639939897828	3	6	1	5	5,67	1	1	6	6	6	98	5,9	Female	0,505939123979212	T1	-5,67952858203415	-0,737899034892354	4,20638455827765	maart	3	5	Week	Friday	82	9,60207869339273	0	Control	Control
33	primary	old	100	Control	280	1	12	0	5	2018-03-10	3	1	10299	58	observed	11,4	1,8	6,6	-0,0285214982740484	5,4	1,0639939897828	3	6	1	5	5,67	1	1	6	6	6	98	5,9	Female	0,505939123979212	T1	-0,77952858203415	-4,73789903489235	5,70638455827765	maart	3	6	Weekend	Saturday	89	16,6020786933927	0	Control	Control
33	primary	old	100	Control	280	1	12	0	5	2018-03-08	1	1	17146	90	observed	4,8	2	3,2	-0,0285214982740484	5,4	1,0639939897828	3	6	1	5	5,67	1	1	6	6	6	98	5,9	Female	0,505939123979212	T1	-7,37952858203415	-4,53789903489235	2,30638455827765	maart	3	4	Week	Thursday	84	11,6020786933927	0	Control	Control
33	primary	old	100	Control	280	1	12	0	5	2018-03-11	4	1	1630	0	observed	10,2	2,5	1	-0,0285214982740484	5,4	1,0639939897828	3	6	1	5	5,67	1	1	6	6	6	98	5,9	Female	0,505939123979212	T1	-1,97952858203415	-4,03789903489235	0,106384558277654	maart	3	0	Weekend	Sunday	91	18,6020786933927	0	Control	Control
33	primary	old	100	Control	280	1	13	0	6	2018-05-25	2	1	2233	0	observed	20,6	10,5	0	-0,0285214982740484	5,4	1,0639939897828	2	1	2	3	3,67	1	1	6	6	6	100	6	Female	1,50593912397921	T2	8,42047141796585	3,96210096510765	-0,893615441722346	mei	5	5	Week	Friday	73	0,602078693392727	0	Control	Control
33	primary	old	100	Control	280	1	13	0	6	2018-05-24	1	1	1287	0	observed	18,3	3,1	0,7	-0,0285214982740484	5,4	1,0639939897828	2	1	2	3	3,67	1	1	6	6	6	100	6	Female	1,50593912397921	T2	6,12047141796585	-3,43789903489235	-0,193615441722346	mei	5	4	Week	Thursday	69	-3,39792130660727	0	Control	Control
33	primary	old	100	Control	280	1	13	0	6	2018-05-28	5	1	1302	0	observed	22,5	11,6	0,3	-0,0285214982740484	5,4	1,0639939897828	2	1	2	3	3,67	1	1	6	6	6	100	6	Female	1,50593912397921	T2	10,3204714179658	5,06210096510765	-0,593615441722346	mei	5	1	Week	Monday	69	-3,39792130660727	0	Control	Control
33	primary	old	100	Control	280	1	13	0	6	2018-05-26	3	1	1388	0	observed	23	11,9	0	-0,0285214982740484	5,4	1,0639939897828	2	1	2	3	3,67	1	1	6	6	6	100	6	Female	1,50593912397921	T2	10,8204714179658	5,36210096510765	-0,893615441722346	mei	5	6	Weekend	Saturday	59	-13,3979213066073	0	Control	Control
33	primary	old	100	Control	280	1	13	0	7	2018-06-22	2	1	13277	84	observed	13,3	1,5	0	-0,0285214982740484	5,4	1,0639939897828	1	1	0	3,5	5	1	1	6	6	6	100	6	Female	1,50593912397921	T3	1,12047141796585	-5,03789903489235	-0,893615441722346	juni	6	5	Week	Friday	68	-4,39792130660727	0	Control	Control
33	primary	old	100	Control	266	0	12	0	7	2018-06-23	3	1	8621	55	imputed	15,1	4,9	0	-0,0808115046607722	3,1	-1,2360060102172	NA	NA	NA	NA	NA	NA	NA	NA	NA	NA	NA	NA	Male	0,505939123979212	T3	2,92047141796585	-1,63789903489235	-0,893615441722346	juni	6	6	Weekend	Saturday	71	-1,39792130660727	0	Control	Control
33	primary	old	100	Control	267	1	11	0	5	2018-03-08	1	1	11784	44	observed	4,8	2	3,2	2,23196248447571	4,45	0,113993989782798	2	0	7	5	5	2,33	1	6	6	6	98	5,9	Female	-0,494060876020788	T1	-7,37952858203415	-4,53789903489235	2,30638455827765	maart	3	4	Week	Thursday	84	11,6020786933927	0	Control	Control
33	primary	old	100	Control	267	1	11	0	5	2018-03-09	2	1	6238	0	observed	6,5	5,8	5,1	2,23196248447571	4,45	0,113993989782798	2	0	7	5	5	2,33	1	6	6	6	98	5,9	Female	-0,494060876020788	T1	-5,67952858203415	-0,737899034892354	4,20638455827765	maart	3	5	Week	Friday	82	9,60207869339273	0	Control	Control
33	primary	old	100	Control	267	1	11	0	5	2018-03-10	3	1	5784	19	observed	11,4	1,8	6,6	2,23196248447571	4,45	0,113993989782798	2	0	7	5	5	2,33	1	6	6	6	98	5,9	Female	-0,494060876020788	T1	-0,77952858203415	-4,73789903489235	5,70638455827765	maart	3	6	Weekend	Saturday	89	16,6020786933927	0	Control	Control
33	primary	old	100	Control	267	1	11	0	5	2018-03-11	4	1	11833	69	observed	10,2	2,5	1	2,23196248447571	4,45	0,113993989782798	2	0	7	5	5	2,33	1	6	6	6	98	5,9	Female	-0,494060876020788	T1	-1,97952858203415	-4,03789903489235	0,106384558277654	maart	3	0	Weekend	Sunday	91	18,6020786933927	0	Control	Control
33	primary	old	100	Control	267	1	11	0	5	2018-03-12	5	1	8015	16	observed	10,3	2,6	1,8	2,23196248447571	4,45	0,113993989782798	2	0	7	5	5	2,33	1	6	6	6	98	5,9	Female	-0,494060876020788	T1	-1,87952858203415	-3,93789903489235	0,906384558277654	maart	3	1	Week	Monday	85	12,6020786933927	0	Control	Control
33	primary	old	100	Control	267	1	11	0	6	2018-05-27	4	1	9258	24	observed	20,3	3,1	1,9	2,23196248447571	4,45	0,113993989782798	7	7	4	3	3,67	1	1	5	5	5	65	4,25	Female	-0,494060876020788	T2	8,12047141796585	-3,43789903489235	1,00638455827765	mei	5	0	Weekend	Sunday	71	-1,39792130660727	0	Control	Control
33	primary	old	100	Control	267	1	11	0	6	2018-05-24	1	1	8348	8	observed	18,3	3,1	0,7	2,23196248447571	4,45	0,113993989782798	7	7	4	3	3,67	1	1	5	5	5	65	4,25	Female	-0,494060876020788	T2	6,12047141796585	-3,43789903489235	-0,193615441722346	mei	5	4	Week	Thursday	69	-3,39792130660727	0	Control	Control
33	primary	old	100	Control	267	1	11	0	6	2018-05-25	2	1	14520	45	observed	20,6	10,5	0	2,23196248447571	4,45	0,113993989782798	7	7	4	3	3,67	1	1	5	5	5	65	4,25	Female	-0,494060876020788	T2	8,42047141796585	3,96210096510765	-0,893615441722346	mei	5	5	Week	Friday	73	0,602078693392727	0	Control	Control
33	primary	old	100	Control	267	1	11	0	6	2018-05-26	3	1	14956	58	observed	23	11,9	0	2,23196248447571	4,45	0,113993989782798	7	7	4	3	3,67	1	1	5	5	5	65	4,25	Female	-0,494060876020788	T2	10,8204714179658	5,36210096510765	-0,893615441722346	mei	5	6	Weekend	Saturday	59	-13,3979213066073	0	Control	Control
33	primary	old	100	Control	267	1	11	0	6	2018-05-28	5	1	9257	0	observed	22,5	11,6	0,3	2,23196248447571	4,45	0,113993989782798	7	7	4	3	3,67	1	1	5	5	5	65	4,25	Female	-0,494060876020788	T2	10,3204714179658	5,06210096510765	-0,593615441722346	mei	5	1	Week	Monday	69	-3,39792130660727	0	Control	Control
33	primary	old	100	Control	267	1	11	0	7	2018-06-25	5	1	1234	0	observed	16,5	9,6	0	2,23196248447571	4,45	0,113993989782798	4	4	2	5	5	1	1	4	4	4	61	4,05	Female	-0,494060876020788	T3	4,32047141796585	3,06210096510765	-0,893615441722346	juni	6	1	Week	Monday	75	2,60207869339273	0	Control	Control
33	primary	old	100	Control	267	1	11	0	7	2018-06-22	2	1	4398	13	imputed	13,3	1,5	0	2,23196248447571	4,45	0,113993989782798	4	4	2	5	5	1	1	4	4	4	61	4,05	Female	-0,494060876020788	T3	1,12047141796585	-5,03789903489235	-0,893615441722346	juni	6	5	Week	Friday	68	-4,39792130660727	0	Control	Control
33	primary	old	100	Control	267	1	11	0	7	2018-06-24	4	1	1550	0	observed	14,7	0,7	0	2,23196248447571	4,45	0,113993989782798	4	4	2	5	5	1	1	4	4	4	61	4,05	Female	-0,494060876020788	T3	2,52047141796585	-5,83789903489235	-0,893615441722346	juni	6	0	Weekend	Sunday	78	5,60207869339273	0	Control	Control
33	primary	old	100	Control	281	0	11	0	7	2018-06-22	2	1	4183	159	imputed	13,3	1,5	0	-0,0756123197492971	3,8	-0,536006010217203	NA	NA	NA	NA	NA	NA	NA	NA	NA	NA	76	4,8	Male	-0,494060876020788	T3	1,12047141796585	-5,03789903489235	-0,893615441722346	juni	6	5	Week	Friday	68	-4,39792130660727	0	Control	Control
33	primary	old	100	Control	281	0	11	0	7	2018-06-23	3	1	14066	174	imputed	15,1	4,9	0	-0,0756123197492971	3,8	-0,536006010217203	NA	NA	NA	NA	NA	NA	NA	NA	NA	NA	76	4,8	Male	-0,494060876020788	T3	2,92047141796585	-1,63789903489235	-0,893615441722346	juni	6	6	Weekend	Saturday	71	-1,39792130660727	0	Control	Control
33	primary	old	100	Control	282	1	11	0	5	2018-03-08	1	1	6731	7	observed	4,8	2	3,2	2,56279643527231	3,35	-0,986006010217203	3	3	0	4	6	1	1	6	6	6	100	6	Female	-0,494060876020788	T1	-7,37952858203415	-4,53789903489235	2,30638455827765	maart	3	4	Week	Thursday	84	11,6020786933927	0	Control	Control
33	primary	old	100	Control	1317	0	12	0	6	2018-05-25	2	1	13483	71	observed	20,6	10,5	0	-0,759318665325229	5,5	1,1639939897828	7	4	0	6	6	2,67	2,67	6	6	6	100	6	Male	0,505939123979212	T2	8,42047141796585	3,96210096510765	-0,893615441722346	mei	5	5	Week	Friday	73	0,602078693392727	0	Control	Control
33	primary	old	100	Control	4030	1	12	0	5	2018-03-10	3	1	9542	37	observed	11,4	1,8	6,6	0,474899857598415	4,5	0,163993989782798	7	7	1	3,5	6	1,33	1	6	6	6	100	6	Female	0,505939123979212	T1	-0,77952858203415	-4,73789903489235	5,70638455827765	maart	3	6	Weekend	Saturday	89	16,6020786933927	0	Control	Control
33	primary	old	100	Control	4030	1	12	0	5	2018-03-12	5	1	10564	28	observed	10,3	2,6	1,8	0,474899857598415	4,5	0,163993989782798	7	7	1	3,5	6	1,33	1	6	6	6	100	6	Female	0,505939123979212	T1	-1,87952858203415	-3,93789903489235	0,906384558277654	maart	3	1	Week	Monday	85	12,6020786933927	0	Control	Control
33	primary	old	100	Control	282	1	11	0	5	2018-03-09	2	1	6939	0	observed	6,5	5,8	5,1	2,56279643527231	3,35	-0,986006010217203	3	3	0	4	6	1	1	6	6	6	100	6	Female	-0,494060876020788	T1	-5,67952858203415	-0,737899034892354	4,20638455827765	maart	3	5	Week	Friday	82	9,60207869339273	0	Control	Control
33	primary	old	100	Control	282	1	12	0	6	2018-05-24	1	1	11714	54	observed	18,3	3,1	0,7	2,56279643527231	3,35	-0,986006010217203	2	3	0	5	5,33	1	1	6	6	6	91	5,55	Female	0,505939123979212	T2	6,12047141796585	-3,43789903489235	-0,193615441722346	mei	5	4	Week	Thursday	69	-3,39792130660727	0	Control	Control
33	primary	old	100	Control	282	1	12	0	6	2018-05-27	4	1	5466	11	observed	20,3	3,1	1,9	2,56279643527231	3,35	-0,986006010217203	2	3	0	5	5,33	1	1	6	6	6	91	5,55	Female	0,505939123979212	T2	8,12047141796585	-3,43789903489235	1,00638455827765	mei	5	0	Weekend	Sunday	71	-1,39792130660727	0	Control	Control
33	primary	old	100	Control	282	1	12	0	6	2018-05-26	3	1	12851	87	observed	23	11,9	0	2,56279643527231	3,35	-0,986006010217203	2	3	0	5	5,33	1	1	6	6	6	91	5,55	Female	0,505939123979212	T2	10,8204714179658	5,36210096510765	-0,893615441722346	mei	5	6	Weekend	Saturday	59	-13,3979213066073	0	Control	Control
33	primary	old	100	Control	272	1	12	0	7	2018-06-24	4	1	11009	60	observed	14,7	0,7	0	-0,117032298065756	5,5	1,1639939897828	NA	NA	NA	NA	NA	NA	NA	NA	NA	NA	100	6	Female	0,505939123979212	T3	2,52047141796585	-5,83789903489235	-0,893615441722346	juni	6	0	Weekend	Sunday	78	5,60207869339273	0	Control	Control
33	primary	old	100	Control	271	0	12	0	5	2018-03-08	1	1	11736	72	observed	4,8	2	3,2	1,44794595526636	5	0,663993989782798	7	5	0	6	6	1,67	1	4	2	3	100	6	Male	0,505939123979212	T1	-7,37952858203415	-4,53789903489235	2,30638455827765	maart	3	4	Week	Thursday	84	11,6020786933927	0	Control	Control
33	primary	old	100	Control	272	1	12	0	7	2018-06-21	1	1	13869	1	imputed	14,4	8,1	0	-0,117032298065756	5,5	1,1639939897828	NA	NA	NA	NA	NA	NA	NA	NA	NA	NA	100	6	Female	0,505939123979212	T3	2,22047141796585	1,56210096510765	-0,893615441722346	juni	6	4	Week	Thursday	68	-4,39792130660727	0	Control	Control
33	primary	old	100	Control	275	0	11	0	5	2018-03-09	2	1	9652	36	imputed	6,5	5,8	5,1	0,950341930587551	5,35	1,0139939897828	7	4	5	4,5	5,33	2	1	6	6	6	100	6	Male	-0,494060876020788	T1	-5,67952858203415	-0,737899034892354	4,20638455827765	maart	3	5	Week	Friday	82	9,60207869339273	0	Control	Control
33	primary	old	100	Control	1317	0	12	0	6	2018-05-27	4	1	10330	45	observed	20,3	3,1	1,9	-0,759318665325229	5,5	1,1639939897828	7	4	0	6	6	2,67	2,67	6	6	6	100	6	Male	0,505939123979212	T2	8,12047141796585	-3,43789903489235	1,00638455827765	mei	5	0	Weekend	Sunday	71	-1,39792130660727	0	Control	Control
33	primary	old	100	Control	1317	0	12	0	6	2018-05-28	5	1	10570	84	observed	22,5	11,6	0,3	-0,759318665325229	5,5	1,1639939897828	7	4	0	6	6	2,67	2,67	6	6	6	100	6	Male	0,505939123979212	T2	10,3204714179658	5,06210096510765	-0,593615441722346	mei	5	1	Week	Monday	69	-3,39792130660727	0	Control	Control
33	primary	old	100	Control	271	0	12	0	6	2018-05-27	4	1	16231	117	observed	20,3	3,1	1,9	1,44794595526636	5	0,663993989782798	3	4	3	6	6	2	2,67	6	1	3,5	100	6	Male	0,505939123979212	T2	8,12047141796585	-3,43789903489235	1,00638455827765	mei	5	0	Weekend	Sunday	71	-1,39792130660727	0	Control	Control
33	primary	old	100	Control	1317	0	12	0	6	2018-05-24	1	1	16974	102	observed	18,3	3,1	0,7	-0,759318665325229	5,5	1,1639939897828	7	4	0	6	6	2,67	2,67	6	6	6	100	6	Male	0,505939123979212	T2	6,12047141796585	-3,43789903489235	-0,193615441722346	mei	5	4	Week	Thursday	69	-3,39792130660727	0	Control	Control
33	primary	old	100	Control	1317	0	12	0	7	2018-06-22	2	1	5666	34	observed	13,3	1,5	0	-0,759318665325229	5,5	1,1639939897828	NA	NA	NA	NA	NA	NA	NA	NA	NA	NA	100	6	Male	0,505939123979212	T3	1,12047141796585	-5,03789903489235	-0,893615441722346	juni	6	5	Week	Friday	68	-4,39792130660727	0	Control	Control
33	primary	old	100	Control	283	0	11	0	5	2018-03-09	2	1	10861	74	observed	6,5	5,8	5,1	-1,07123728816904	3,4	-0,936006010217203	5	5	7	5,5	4	5,33	1,67	5	4	4,5	68	4,4	Male	-0,494060876020788	T1	-5,67952858203415	-0,737899034892354	4,20638455827765	maart	3	5	Week	Friday	82	9,60207869339273	0	Control	Control
33	primary	old	100	Control	270	0	11	0	7	2018-06-23	3	1	5632	48	imputed	15,1	4,9	0	0,842463209361238	2,9	-1,4360060102172	NA	NA	NA	NA	NA	NA	NA	NA	NA	NA	NA	NA	Male	-0,494060876020788	T3	2,92047141796585	-1,63789903489235	-0,893615441722346	juni	6	6	Weekend	Saturday	71	-1,39792130660727	0	Control	Control
33	primary	old	100	Control	270	0	11	0	7	2018-06-21	1	1	12398	0	imputed	14,4	8,1	0	0,842463209361238	2,9	-1,4360060102172	NA	NA	NA	NA	NA	NA	NA	NA	NA	NA	NA	NA	Male	-0,494060876020788	T3	2,22047141796585	1,56210096510765	-0,893615441722346	juni	6	4	Week	Thursday	68	-4,39792130660727	0	Control	Control
33	primary	old	100	Control	271	0	12	0	5	2018-03-11	4	1	6675	20	observed	10,2	2,5	1	1,44794595526636	5	0,663993989782798	7	5	0	6	6	1,67	1	4	2	3	100	6	Male	0,505939123979212	T1	-1,97952858203415	-4,03789903489235	0,106384558277654	maart	3	0	Weekend	Sunday	91	18,6020786933927	0	Control	Control
33	primary	old	100	Control	271	0	12	0	5	2018-03-10	3	1	4959	0	observed	11,4	1,8	6,6	1,44794595526636	5	0,663993989782798	7	5	0	6	6	1,67	1	4	2	3	100	6	Male	0,505939123979212	T1	-0,77952858203415	-4,73789903489235	5,70638455827765	maart	3	6	Weekend	Saturday	89	16,6020786933927	0	Control	Control
33	primary	old	100	Control	281	0	11	0	6	2018-05-28	5	1	14191	134	observed	22,5	11,6	0,3	-0,0756123197492971	3,8	-0,536006010217203	7	7	7	5,5	5,33	3	3	4	5	4,5	98	5,9	Male	-0,494060876020788	T2	10,3204714179658	5,06210096510765	-0,593615441722346	mei	5	1	Week	Monday	69	-3,39792130660727	0	Control	Control
33	primary	old	100	Control	271	0	12	0	5	2018-03-09	2	1	12674	66	observed	6,5	5,8	5,1	1,44794595526636	5	0,663993989782798	7	5	0	6	6	1,67	1	4	2	3	100	6	Male	0,505939123979212	T1	-5,67952858203415	-0,737899034892354	4,20638455827765	maart	3	5	Week	Friday	82	9,60207869339273	0	Control	Control
33	primary	old	100	Control	271	0	12	0	5	2018-03-12	5	1	18946	177	observed	10,3	2,6	1,8	1,44794595526636	5	0,663993989782798	7	5	0	6	6	1,67	1	4	2	3	100	6	Male	0,505939123979212	T1	-1,87952858203415	-3,93789903489235	0,906384558277654	maart	3	1	Week	Monday	85	12,6020786933927	0	Control	Control
33	primary	old	100	Control	271	0	12	0	6	2018-05-28	5	1	11970	56	observed	22,5	11,6	0,3	1,44794595526636	5	0,663993989782798	3	4	3	6	6	2	2,67	6	1	3,5	100	6	Male	0,505939123979212	T2	10,3204714179658	5,06210096510765	-0,593615441722346	mei	5	1	Week	Monday	69	-3,39792130660727	0	Control	Control
33	primary	old	100	Control	271	0	12	0	6	2018-05-26	3	1	5240	20	observed	23	11,9	0	1,44794595526636	5	0,663993989782798	3	4	3	6	6	2	2,67	6	1	3,5	100	6	Male	0,505939123979212	T2	10,8204714179658	5,36210096510765	-0,893615441722346	mei	5	6	Weekend	Saturday	59	-13,3979213066073	0	Control	Control
33	primary	old	100	Control	275	0	11	0	5	2018-03-08	1	1	2789	70	imputed	4,8	2	3,2	0,950341930587551	5,35	1,0139939897828	7	4	5	4,5	5,33	2	1	6	6	6	100	6	Male	-0,494060876020788	T1	-7,37952858203415	-4,53789903489235	2,30638455827765	maart	3	4	Week	Thursday	84	11,6020786933927	0	Control	Control
33	primary	old	100	Control	271	0	12	0	6	2018-05-25	2	1	13430	60	observed	20,6	10,5	0	1,44794595526636	5	0,663993989782798	3	4	3	6	6	2	2,67	6	1	3,5	100	6	Male	0,505939123979212	T2	8,42047141796585	3,96210096510765	-0,893615441722346	mei	5	5	Week	Friday	73	0,602078693392727	0	Control	Control
33	primary	old	100	Control	271	0	12	0	6	2018-05-24	1	1	13810	81	observed	18,3	3,1	0,7	1,44794595526636	5	0,663993989782798	3	4	3	6	6	2	2,67	6	1	3,5	100	6	Male	0,505939123979212	T2	6,12047141796585	-3,43789903489235	-0,193615441722346	mei	5	4	Week	Thursday	69	-3,39792130660727	0	Control	Control
33	primary	old	100	Control	271	0	12	0	7	2018-06-25	5	1	8445	66	observed	16,5	9,6	0	1,44794595526636	5	0,663993989782798	NA	NA	NA	NA	NA	NA	NA	6	2	4	88	5,4	Male	0,505939123979212	T3	4,32047141796585	3,06210096510765	-0,893615441722346	juni	6	1	Week	Monday	75	2,60207869339273	0	Control	Control
33	primary	old	100	Control	271	0	12	0	7	2018-06-22	2	1	3153	11	observed	13,3	1,5	0	1,44794595526636	5	0,663993989782798	NA	NA	NA	NA	NA	NA	NA	6	2	4	88	5,4	Male	0,505939123979212	T3	1,12047141796585	-5,03789903489235	-0,893615441722346	juni	6	5	Week	Friday	68	-4,39792130660727	0	Control	Control
33	primary	old	100	Control	281	0	11	0	5	2018-03-09	2	1	10733	65	observed	6,5	5,8	5,1	-0,0756123197492971	3,8	-0,536006010217203	4	3	4	2	4,33	1	1	2	5	3,5	72	4,6	Male	-0,494060876020788	T1	-5,67952858203415	-0,737899034892354	4,20638455827765	maart	3	5	Week	Friday	82	9,60207869339273	0	Control	Control
33	primary	old	100	Control	281	0	11	0	6	2018-05-24	1	1	17265	144	observed	18,3	3,1	0,7	-0,0756123197492971	3,8	-0,536006010217203	7	7	7	5,5	5,33	3	3	4	5	4,5	98	5,9	Male	-0,494060876020788	T2	6,12047141796585	-3,43789903489235	-0,193615441722346	mei	5	4	Week	Thursday	69	-3,39792130660727	0	Control	Control
33	primary	old	100	Control	281	0	11	0	6	2018-05-25	2	1	12314	46	observed	20,6	10,5	0	-0,0756123197492971	3,8	-0,536006010217203	7	7	7	5,5	5,33	3	3	4	5	4,5	98	5,9	Male	-0,494060876020788	T2	8,42047141796585	3,96210096510765	-0,893615441722346	mei	5	5	Week	Friday	73	0,602078693392727	0	Control	Control
33	primary	old	100	Control	1317	0	11	0	5	2018-03-12	5	1	10741	54	observed	10,3	2,6	1,8	-0,759318665325229	5,5	1,1639939897828	7	0	0	4	4,67	1	1	1	1	1	100	6	Male	-0,494060876020788	T1	-1,87952858203415	-3,93789903489235	0,906384558277654	maart	3	1	Week	Monday	85	12,6020786933927	0	Control	Control
33	primary	old	100	Control	281	0	11	0	6	2018-05-26	3	1	14474	146	imputed	23	11,9	0	-0,0756123197492971	3,8	-0,536006010217203	7	7	7	5,5	5,33	3	3	4	5	4,5	98	5,9	Male	-0,494060876020788	T2	10,8204714179658	5,36210096510765	-0,893615441722346	mei	5	6	Weekend	Saturday	59	-13,3979213066073	0	Control	Control
33	primary	old	100	Control	281	0	11	0	7	2018-06-21	1	1	20476	103	imputed	14,4	8,1	0	-0,0756123197492971	3,8	-0,536006010217203	NA	NA	NA	NA	NA	NA	NA	NA	NA	NA	76	4,8	Male	-0,494060876020788	T3	2,22047141796585	1,56210096510765	-0,893615441722346	juni	6	4	Week	Thursday	68	-4,39792130660727	0	Control	Control
33	primary	old	100	Control	275	0	11	0	5	2018-03-10	3	1	8173	8	imputed	11,4	1,8	6,6	0,950341930587551	5,35	1,0139939897828	7	4	5	4,5	5,33	2	1	6	6	6	100	6	Male	-0,494060876020788	T1	-0,77952858203415	-4,73789903489235	5,70638455827765	maart	3	6	Weekend	Saturday	89	16,6020786933927	0	Control	Control
33	primary	old	100	Control	280	1	13	0	7	2018-06-25	5	1	12338	32	observed	16,5	9,6	0	-0,0285214982740484	5,4	1,0639939897828	1	1	0	3,5	5	1	1	6	6	6	100	6	Female	1,50593912397921	T3	4,32047141796585	3,06210096510765	-0,893615441722346	juni	6	1	Week	Monday	75	2,60207869339273	0	Control	Control
33	primary	old	100	Control	275	0	11	0	6	2018-05-24	1	1	9606	32	imputed	18,3	3,1	0,7	0,950341930587551	5,35	1,0139939897828	6	7	7	6	6	1	1	5	5	5	100	6	Male	-0,494060876020788	T2	6,12047141796585	-3,43789903489235	-0,193615441722346	mei	5	4	Week	Thursday	69	-3,39792130660727	0	Control	Control
33	primary	old	100	Control	270	0	11	0	5	2018-03-11	4	1	3189	0	observed	10,2	2,5	1	0,842463209361238	2,9	-1,4360060102172	7	7	4	2,5	6	1	1	3	5	4	54	3,7	Male	-0,494060876020788	T1	-1,97952858203415	-4,03789903489235	0,106384558277654	maart	3	0	Weekend	Sunday	91	18,6020786933927	0	Control	Control
33	primary	old	100	Control	270	0	11	0	5	2018-03-10	3	1	12329	65	imputed	11,4	1,8	6,6	0,842463209361238	2,9	-1,4360060102172	7	7	4	2,5	6	1	1	3	5	4	54	3,7	Male	-0,494060876020788	T1	-0,77952858203415	-4,73789903489235	5,70638455827765	maart	3	6	Weekend	Saturday	89	16,6020786933927	0	Control	Control
33	primary	old	100	Control	4030	1	12	0	5	2018-03-09	2	1	9345	15	observed	6,5	5,8	5,1	0,474899857598415	4,5	0,163993989782798	7	7	1	3,5	6	1,33	1	6	6	6	100	6	Female	0,505939123979212	T1	-5,67952858203415	-0,737899034892354	4,20638455827765	maart	3	5	Week	Friday	82	9,60207869339273	0	Control	Control
33	primary	old	100	Control	4030	1	12	0	5	2018-03-11	4	1	9669	17	observed	10,2	2,5	1	0,474899857598415	4,5	0,163993989782798	7	7	1	3,5	6	1,33	1	6	6	6	100	6	Female	0,505939123979212	T1	-1,97952858203415	-4,03789903489235	0,106384558277654	maart	3	0	Weekend	Sunday	91	18,6020786933927	0	Control	Control
33	primary	old	100	Control	4030	1	12	0	5	2018-03-08	1	1	10409	40	observed	4,8	2	3,2	0,474899857598415	4,5	0,163993989782798	7	7	1	3,5	6	1,33	1	6	6	6	100	6	Female	0,505939123979212	T1	-7,37952858203415	-4,53789903489235	2,30638455827765	maart	3	4	Week	Thursday	84	11,6020786933927	0	Control	Control
33	primary	old	100	Control	4030	1	12	0	6	2018-05-24	1	1	10746	38	observed	18,3	3,1	0,7	0,474899857598415	4,5	0,163993989782798	NA	NA	NA	NA	NA	NA	NA	6	6	6	31	2,55	Female	0,505939123979212	T2	6,12047141796585	-3,43789903489235	-0,193615441722346	mei	5	4	Week	Thursday	69	-3,39792130660727	0	Control	Control
33	primary	old	100	Control	283	0	11	0	5	2018-03-11	4	1	8098	26	observed	10,2	2,5	1	-1,07123728816904	3,4	-0,936006010217203	5	5	7	5,5	4	5,33	1,67	5	4	4,5	68	4,4	Male	-0,494060876020788	T1	-1,97952858203415	-4,03789903489235	0,106384558277654	maart	3	0	Weekend	Sunday	91	18,6020786933927	0	Control	Control
33	primary	old	100	Control	283	0	11	0	6	2018-05-24	1	1	1931	0	observed	18,3	3,1	0,7	-1,07123728816904	3,4	-0,936006010217203	NA	NA	NA	NA	NA	NA	NA	NA	NA	NA	64	4,2	Male	-0,494060876020788	T2	6,12047141796585	-3,43789903489235	-0,193615441722346	mei	5	4	Week	Thursday	69	-3,39792130660727	0	Control	Control
33	primary	old	100	Control	283	0	11	0	6	2018-05-25	2	1	1000	0	imputed	20,6	10,5	0	-1,07123728816904	3,4	-0,936006010217203	NA	NA	NA	NA	NA	NA	NA	NA	NA	NA	64	4,2	Male	-0,494060876020788	T2	8,42047141796585	3,96210096510765	-0,893615441722346	mei	5	5	Week	Friday	73	0,602078693392727	0	Control	Control
33	primary	old	100	Control	280	1	13	0	7	2018-06-23	3	1	11000	40	observed	15,1	4,9	0	-0,0285214982740484	5,4	1,0639939897828	1	1	0	3,5	5	1	1	6	6	6	100	6	Female	1,50593912397921	T3	2,92047141796585	-1,63789903489235	-0,893615441722346	juni	6	6	Weekend	Saturday	71	-1,39792130660727	0	Control	Control
33	primary	old	100	Control	280	1	13	0	7	2018-06-21	1	1	1000	0	imputed	14,4	8,1	0	-0,0285214982740484	5,4	1,0639939897828	1	1	0	3,5	5	1	1	6	6	6	100	6	Female	1,50593912397921	T3	2,22047141796585	1,56210096510765	-0,893615441722346	juni	6	4	Week	Thursday	68	-4,39792130660727	0	Control	Control
33	primary	old	100	Control	4030	1	12	0	7	2018-06-23	3	1	14095	12	imputed	15,1	4,9	0	0,474899857598415	4,5	0,163993989782798	NA	NA	NA	NA	NA	NA	NA	NA	NA	NA	NA	NA	Female	0,505939123979212	T3	2,92047141796585	-1,63789903489235	-0,893615441722346	juni	6	6	Weekend	Saturday	71	-1,39792130660727	0	Control	Control
33	primary	old	100	Control	280	1	13	0	7	2018-06-24	4	1	13576	66	observed	14,7	0,7	0	-0,0285214982740484	5,4	1,0639939897828	1	1	0	3,5	5	1	1	6	6	6	100	6	Female	1,50593912397921	T3	2,52047141796585	-5,83789903489235	-0,893615441722346	juni	6	0	Weekend	Sunday	78	5,60207869339273	0	Control	Control
33	primary	old	100	Control	1317	0	12	0	7	2018-06-21	1	1	17176	22	imputed	14,4	8,1	0	-0,759318665325229	5,5	1,1639939897828	NA	NA	NA	NA	NA	NA	NA	NA	NA	NA	100	6	Male	0,505939123979212	T3	2,22047141796585	1,56210096510765	-0,893615441722346	juni	6	4	Week	Thursday	68	-4,39792130660727	0	Control	Control
33	primary	old	100	Control	281	0	11	0	5	2018-03-10	3	1	16644	120	observed	11,4	1,8	6,6	-0,0756123197492971	3,8	-0,536006010217203	4	3	4	2	4,33	1	1	2	5	3,5	72	4,6	Male	-0,494060876020788	T1	-0,77952858203415	-4,73789903489235	5,70638455827765	maart	3	6	Weekend	Saturday	89	16,6020786933927	0	Control	Control
33	primary	old	100	Control	270	0	11	0	6	2018-05-25	2	1	11703	72	observed	20,6	10,5	0	0,842463209361238	2,9	-1,4360060102172	NA	NA	NA	NA	NA	NA	NA	NA	NA	NA	63	4,15	Male	-0,494060876020788	T2	8,42047141796585	3,96210096510765	-0,893615441722346	mei	5	5	Week	Friday	73	0,602078693392727	0	Control	Control
33	primary	old	100	Control	1317	0	12	0	7	2018-06-24	4	1	6787	23	observed	14,7	0,7	0	-0,759318665325229	5,5	1,1639939897828	NA	NA	NA	NA	NA	NA	NA	NA	NA	NA	100	6	Male	0,505939123979212	T3	2,52047141796585	-5,83789903489235	-0,893615441722346	juni	6	0	Weekend	Sunday	78	5,60207869339273	0	Control	Control
33	primary	old	100	Control	270	0	11	0	5	2018-03-08	1	1	13601	102	observed	4,8	2	3,2	0,842463209361238	2,9	-1,4360060102172	7	7	4	2,5	6	1	1	3	5	4	54	3,7	Male	-0,494060876020788	T1	-7,37952858203415	-4,53789903489235	2,30638455827765	maart	3	4	Week	Thursday	84	11,6020786933927	0	Control	Control
33	primary	old	100	Control	1317	0	12	0	7	2018-06-23	3	1	9156	33	observed	15,1	4,9	0	-0,759318665325229	5,5	1,1639939897828	NA	NA	NA	NA	NA	NA	NA	NA	NA	NA	100	6	Male	0,505939123979212	T3	2,92047141796585	-1,63789903489235	-0,893615441722346	juni	6	6	Weekend	Saturday	71	-1,39792130660727	0	Control	Control
33	primary	old	100	Control	270	0	11	0	6	2018-05-26	3	1	11773	74	imputed	23	11,9	0	0,842463209361238	2,9	-1,4360060102172	NA	NA	NA	NA	NA	NA	NA	NA	NA	NA	63	4,15	Male	-0,494060876020788	T2	10,8204714179658	5,36210096510765	-0,893615441722346	mei	5	6	Weekend	Saturday	59	-13,3979213066073	0	Control	Control
33	primary	old	100	Control	4030	1	12	0	6	2018-05-25	2	1	14218	30	observed	20,6	10,5	0	0,474899857598415	4,5	0,163993989782798	NA	NA	NA	NA	NA	NA	NA	6	6	6	31	2,55	Female	0,505939123979212	T2	8,42047141796585	3,96210096510765	-0,893615441722346	mei	5	5	Week	Friday	73	0,602078693392727	0	Control	Control
33	primary	old	100	Control	281	0	11	0	5	2018-03-08	1	1	16953	104	observed	4,8	2	3,2	-0,0756123197492971	3,8	-0,536006010217203	4	3	4	2	4,33	1	1	2	5	3,5	72	4,6	Male	-0,494060876020788	T1	-7,37952858203415	-4,53789903489235	2,30638455827765	maart	3	4	Week	Thursday	84	11,6020786933927	0	Control	Control
33	primary	old	100	Control	270	0	11	0	5	2018-03-09	2	1	7876	40	observed	6,5	5,8	5,1	0,842463209361238	2,9	-1,4360060102172	7	7	4	2,5	6	1	1	3	5	4	54	3,7	Male	-0,494060876020788	T1	-5,67952858203415	-0,737899034892354	4,20638455827765	maart	3	5	Week	Friday	82	9,60207869339273	0	Control	Control
33	primary	old	100	Control	283	0	11	0	6	2018-05-26	3	1	1000	7	imputed	23	11,9	0	-1,07123728816904	3,4	-0,936006010217203	NA	NA	NA	NA	NA	NA	NA	NA	NA	NA	64	4,2	Male	-0,494060876020788	T2	10,8204714179658	5,36210096510765	-0,893615441722346	mei	5	6	Weekend	Saturday	59	-13,3979213066073	0	Control	Control
33	primary	old	100	Control	283	0	11	0	7	2018-06-23	3	1	4724	0	imputed	15,1	4,9	0	-1,07123728816904	3,4	-0,936006010217203	NA	NA	NA	NA	NA	NA	NA	1	1	1	92	5,6	Male	-0,494060876020788	T3	2,92047141796585	-1,63789903489235	-0,893615441722346	juni	6	6	Weekend	Saturday	71	-1,39792130660727	0	Control	Control
33	primary	old	100	Control	270	0	11	0	7	2018-06-22	2	1	2011	11	observed	13,3	1,5	0	0,842463209361238	2,9	-1,4360060102172	NA	NA	NA	NA	NA	NA	NA	NA	NA	NA	NA	NA	Male	-0,494060876020788	T3	1,12047141796585	-5,03789903489235	-0,893615441722346	juni	6	5	Week	Friday	68	-4,39792130660727	0	Control	Control
33	primary	old	100	Control	283	0	11	0	7	2018-06-25	5	1	1419	0	observed	16,5	9,6	0	-1,07123728816904	3,4	-0,936006010217203	NA	NA	NA	NA	NA	NA	NA	1	1	1	92	5,6	Male	-0,494060876020788	T3	4,32047141796585	3,06210096510765	-0,893615441722346	juni	6	1	Week	Monday	75	2,60207869339273	0	Control	Control
33	primary	old	100	Control	283	0	11	0	7	2018-06-21	1	1	3265	0	imputed	14,4	8,1	0	-1,07123728816904	3,4	-0,936006010217203	NA	NA	NA	NA	NA	NA	NA	1	1	1	92	5,6	Male	-0,494060876020788	T3	2,22047141796585	1,56210096510765	-0,893615441722346	juni	6	4	Week	Thursday	68	-4,39792130660727	0	Control	Control
33	primary	old	100	Control	281	0	11	0	5	2018-03-11	4	1	11242	68	observed	10,2	2,5	1	-0,0756123197492971	3,8	-0,536006010217203	4	3	4	2	4,33	1	1	2	5	3,5	72	4,6	Male	-0,494060876020788	T1	-1,97952858203415	-4,03789903489235	0,106384558277654	maart	3	0	Weekend	Sunday	91	18,6020786933927	0	Control	Control
33	primary	old	100	Control	270	0	11	0	6	2018-05-24	1	1	11098	56	observed	18,3	3,1	0,7	0,842463209361238	2,9	-1,4360060102172	NA	NA	NA	NA	NA	NA	NA	NA	NA	NA	63	4,15	Male	-0,494060876020788	T2	6,12047141796585	-3,43789903489235	-0,193615441722346	mei	5	4	Week	Thursday	69	-3,39792130660727	0	Control	Control
33	primary	old	100	Control	268	0	12	0	7	2018-06-21	1	1	8411	108	imputed	14,4	8,1	0	0,0606596762101632	4,13487132934652	-0,201134680870681	NA	NA	NA	NA	NA	NA	NA	NA	NA	NA	NA	NA	Male	0,505939123979212	T3	2,22047141796585	1,56210096510765	-0,893615441722346	juni	6	4	Week	Thursday	68	-4,39792130660727	0	Control	Control
33	primary	old	100	Control	283	0	11	0	7	2018-06-22	2	1	6030	0	imputed	13,3	1,5	0	-1,07123728816904	3,4	-0,936006010217203	NA	NA	NA	NA	NA	NA	NA	1	1	1	92	5,6	Male	-0,494060876020788	T3	1,12047141796585	-5,03789903489235	-0,893615441722346	juni	6	5	Week	Friday	68	-4,39792130660727	0	Control	Control
33	primary	new	300	Control	3992	0	10	0	5	2018-03-11	4	1	6903	38	observed	10,2	2,5	1	0,515899839408567	4,9	0,563993989782798	3	2	2	5	4,67	2,33	1,33	4	5	4,5	99	5,95	Male	-1,49406087602079	T1	-1,97952858203415	-4,03789903489235	0,106384558277654	maart	3	0	Weekend	Sunday	91	18,6020786933927	0	Control	Control
33	primary	new	300	Control	3993	0	11	0	5	2018-03-09	2	1	13962	75	observed	6,5	5,8	5,1	0,669677866073038	3,9	-0,436006010217202	2	1	1	4,5	6	4,33	2,33	6	3	4,5	100	6	Male	-0,494060876020788	T1	-5,67952858203415	-0,737899034892354	4,20638455827765	maart	3	5	Week	Friday	82	9,60207869339273	0	Control	Control
33	primary	new	300	Control	3980	1	10	0	6	2018-05-26	3	1	16683	60	observed	23	11,9	0	-0,0274149971739208	5,65	1,3139939897828	4	2	3	4,5	6	1	1	6	6	6	100	6	Female	-1,49406087602079	T2	10,8204714179658	5,36210096510765	-0,893615441722346	mei	5	6	Weekend	Saturday	59	-13,3979213066073	0	Control	Control
33	primary	new	300	Control	3984	1	11	0	7	2018-06-21	1	1	13898	67	observed	14,4	8,1	0	1,54716323713196	4,4	0,0639939897827979	4	1	2	5	6	1	1	5	5	5	86	5,3	Female	-0,494060876020788	T3	2,22047141796585	1,56210096510765	-0,893615441722346	juni	6	4	Week	Thursday	68	-4,39792130660727	0	Control	Control
33	primary	new	300	Control	3993	0	11	0	5	2018-03-08	1	1	10990	65	observed	4,8	2	3,2	0,669677866073038	3,9	-0,436006010217202	2	1	1	4,5	6	4,33	2,33	6	3	4,5	100	6	Male	-0,494060876020788	T1	-7,37952858203415	-4,53789903489235	2,30638455827765	maart	3	4	Week	Thursday	84	11,6020786933927	0	Control	Control
33	primary	new	300	Control	3992	0	10	0	6	2018-05-26	3	1	7918	30	observed	23	11,9	0	0,515899839408567	4,9	0,563993989782798	6	5	5	4	4,67	1,67	2	4	5	4,5	52	3,6	Male	-1,49406087602079	T2	10,8204714179658	5,36210096510765	-0,893615441722346	mei	5	6	Weekend	Saturday	59	-13,3979213066073	0	Control	Control
33	primary	new	300	Control	3985	0	10	0	5	2018-03-08	1	1	11928	71	observed	4,8	2	3,2	-0,144689000105927	5,2	0,863993989782798	7	7	7	6	6	1	1	6	6	6	100	6	Male	-1,49406087602079	T1	-7,37952858203415	-4,53789903489235	2,30638455827765	maart	3	4	Week	Thursday	84	11,6020786933927	0	Control	Control
33	primary	new	300	Control	3985	0	10	0	5	2018-03-10	3	1	6468	9	observed	11,4	1,8	6,6	-0,144689000105927	5,2	0,863993989782798	7	7	7	6	6	1	1	6	6	6	100	6	Male	-1,49406087602079	T1	-0,77952858203415	-4,73789903489235	5,70638455827765	maart	3	6	Weekend	Saturday	89	16,6020786933927	0	Control	Control
33	primary	new	300	Control	3992	0	10	0	5	2018-03-12	5	1	12807	106	observed	10,3	2,6	1,8	0,515899839408567	4,9	0,563993989782798	3	2	2	5	4,67	2,33	1,33	4	5	4,5	99	5,95	Male	-1,49406087602079	T1	-1,87952858203415	-3,93789903489235	0,906384558277654	maart	3	1	Week	Monday	85	12,6020786933927	0	Control	Control
33	primary	new	300	Control	265	1	11	0	5	2018-03-08	1	1	2463	0	observed	4,8	2	3,2	0,851212499027612	5,55192232408857	1,21591631387136	NA	NA	NA	4	6	1,33	1	NA	NA	NA	100	6	Female	-0,494060876020788	T1	-7,37952858203415	-4,53789903489235	2,30638455827765	maart	3	4	Week	Thursday	84	11,6020786933927	0	Control	Control
33	primary	new	300	Control	265	1	11	0	5	2018-03-11	4	1	1213	0	observed	10,2	2,5	1	0,851212499027612	5,55192232408857	1,21591631387136	NA	NA	NA	4	6	1,33	1	NA	NA	NA	100	6	Female	-0,494060876020788	T1	-1,97952858203415	-4,03789903489235	0,106384558277654	maart	3	0	Weekend	Sunday	91	18,6020786933927	0	Control	Control
33	primary	new	300	Control	3992	0	10	0	6	2018-05-28	5	1	9981	74	observed	22,5	11,6	0,3	0,515899839408567	4,9	0,563993989782798	6	5	5	4	4,67	1,67	2	4	5	4,5	52	3,6	Male	-1,49406087602079	T2	10,3204714179658	5,06210096510765	-0,593615441722346	mei	5	1	Week	Monday	69	-3,39792130660727	0	Control	Control
33	primary	new	300	Control	3984	1	11	0	7	2018-06-23	3	1	14176	40	observed	15,1	4,9	0	1,54716323713196	4,4	0,0639939897827979	4	1	2	5	6	1	1	5	5	5	86	5,3	Female	-0,494060876020788	T3	2,92047141796585	-1,63789903489235	-0,893615441722346	juni	6	6	Weekend	Saturday	71	-1,39792130660727	0	Control	Control
33	primary	new	300	Control	3993	0	11	0	5	2018-03-10	3	1	16564	86	observed	11,4	1,8	6,6	0,669677866073038	3,9	-0,436006010217202	2	1	1	4,5	6	4,33	2,33	6	3	4,5	100	6	Male	-0,494060876020788	T1	-0,77952858203415	-4,73789903489235	5,70638455827765	maart	3	6	Weekend	Saturday	89	16,6020786933927	0	Control	Control
33	primary	new	300	Control	265	1	11	0	6	2018-05-26	3	1	8339	59	imputed	23	11,9	0	0,851212499027612	5,55192232408857	1,21591631387136	NA	NA	NA	NA	NA	NA	NA	NA	NA	NA	80	5	Female	-0,494060876020788	T2	10,8204714179658	5,36210096510765	-0,893615441722346	mei	5	6	Weekend	Saturday	59	-13,3979213066073	0	Control	Control
33	primary	new	300	Control	265	1	11	0	6	2018-05-24	1	1	7000	23	observed	18,3	3,1	0,7	0,851212499027612	5,55192232408857	1,21591631387136	NA	NA	NA	NA	NA	NA	NA	NA	NA	NA	80	5	Female	-0,494060876020788	T2	6,12047141796585	-3,43789903489235	-0,193615441722346	mei	5	4	Week	Thursday	69	-3,39792130660727	0	Control	Control
33	primary	new	300	Control	3985	0	10	0	5	2018-03-11	4	1	14563	74	observed	10,2	2,5	1	-0,144689000105927	5,2	0,863993989782798	7	7	7	6	6	1	1	6	6	6	100	6	Male	-1,49406087602079	T1	-1,97952858203415	-4,03789903489235	0,106384558277654	maart	3	0	Weekend	Sunday	91	18,6020786933927	0	Control	Control
33	primary	new	300	Control	3992	0	10	0	5	2018-03-10	3	1	2783	0	observed	11,4	1,8	6,6	0,515899839408567	4,9	0,563993989782798	3	2	2	5	4,67	2,33	1,33	4	5	4,5	99	5,95	Male	-1,49406087602079	T1	-0,77952858203415	-4,73789903489235	5,70638455827765	maart	3	6	Weekend	Saturday	89	16,6020786933927	0	Control	Control
33	primary	new	300	Control	3992	0	10	0	5	2018-03-09	2	1	6720	42	observed	6,5	5,8	5,1	0,515899839408567	4,9	0,563993989782798	3	2	2	5	4,67	2,33	1,33	4	5	4,5	99	5,95	Male	-1,49406087602079	T1	-5,67952858203415	-0,737899034892354	4,20638455827765	maart	3	5	Week	Friday	82	9,60207869339273	0	Control	Control
33	primary	new	300	Control	3992	0	10	0	6	2018-05-24	1	1	12389	81	observed	18,3	3,1	0,7	0,515899839408567	4,9	0,563993989782798	6	5	5	4	4,67	1,67	2	4	5	4,5	52	3,6	Male	-1,49406087602079	T2	6,12047141796585	-3,43789903489235	-0,193615441722346	mei	5	4	Week	Thursday	69	-3,39792130660727	0	Control	Control
33	primary	new	300	Control	3992	0	10	0	6	2018-05-27	4	1	5716	22	observed	20,3	3,1	1,9	0,515899839408567	4,9	0,563993989782798	6	5	5	4	4,67	1,67	2	4	5	4,5	52	3,6	Male	-1,49406087602079	T2	8,12047141796585	-3,43789903489235	1,00638455827765	mei	5	0	Weekend	Sunday	71	-1,39792130660727	0	Control	Control
33	primary	new	300	Control	3988	0	10	0	6	2018-05-28	5	1	26852	215	observed	22,5	11,6	0,3	0,200148000849779	5,4	1,0639939897828	3	2	2	6	6	1	1	6	6	6	100	6	Male	-1,49406087602079	T2	10,3204714179658	5,06210096510765	-0,593615441722346	mei	5	1	Week	Monday	69	-3,39792130660727	0	Control	Control
33	primary	new	300	Control	3988	0	10	0	6	2018-05-24	1	1	19237	160	observed	18,3	3,1	0,7	0,200148000849779	5,4	1,0639939897828	3	2	2	6	6	1	1	6	6	6	100	6	Male	-1,49406087602079	T2	6,12047141796585	-3,43789903489235	-0,193615441722346	mei	5	4	Week	Thursday	69	-3,39792130660727	0	Control	Control
33	primary	new	300	Control	3988	0	10	0	6	2018-05-26	3	1	18586	117	observed	23	11,9	0	0,200148000849779	5,4	1,0639939897828	3	2	2	6	6	1	1	6	6	6	100	6	Male	-1,49406087602079	T2	10,8204714179658	5,36210096510765	-0,893615441722346	mei	5	6	Weekend	Saturday	59	-13,3979213066073	0	Control	Control
33	primary	new	300	Control	3992	0	10	0	7	2018-06-21	1	1	12787	82	observed	14,4	8,1	0	0,515899839408567	4,9	0,563993989782798	NA	NA	NA	NA	NA	NA	NA	NA	NA	NA	NA	NA	Male	-1,49406087602079	T3	2,22047141796585	1,56210096510765	-0,893615441722346	juni	6	4	Week	Thursday	68	-4,39792130660727	0	Control	Control
33	primary	new	300	Control	3992	0	10	0	7	2018-06-23	3	1	12577	132	imputed	15,1	4,9	0	0,515899839408567	4,9	0,563993989782798	NA	NA	NA	NA	NA	NA	NA	NA	NA	NA	NA	NA	Male	-1,49406087602079	T3	2,92047141796585	-1,63789903489235	-0,893615441722346	juni	6	6	Weekend	Saturday	71	-1,39792130660727	0	Control	Control
33	primary	new	300	Control	3984	1	11	0	7	2018-06-24	4	1	10657	68	observed	14,7	0,7	0	1,54716323713196	4,4	0,0639939897827979	4	1	2	5	6	1	1	5	5	5	86	5,3	Female	-0,494060876020788	T3	2,52047141796585	-5,83789903489235	-0,893615441722346	juni	6	0	Weekend	Sunday	78	5,60207869339273	0	Control	Control
33	primary	new	300	Control	3988	0	10	0	7	2018-06-23	3	1	18505	142	observed	15,1	4,9	0	0,200148000849779	5,4	1,0639939897828	3	2	2	6	5,67	1,33	1	6	6	6	100	6	Male	-1,49406087602079	T3	2,92047141796585	-1,63789903489235	-0,893615441722346	juni	6	6	Weekend	Saturday	71	-1,39792130660727	0	Control	Control
33	primary	new	300	Control	3988	0	10	0	7	2018-06-21	1	1	16792	109	observed	14,4	8,1	0	0,200148000849779	5,4	1,0639939897828	3	2	2	6	5,67	1,33	1	6	6	6	100	6	Male	-1,49406087602079	T3	2,22047141796585	1,56210096510765	-0,893615441722346	juni	6	4	Week	Thursday	68	-4,39792130660727	0	Control	Control
33	primary	new	300	Control	265	1	11	0	7	2018-06-22	2	1	12279	71	observed	13,3	1,5	0	0,851212499027612	5,55192232408857	1,21591631387136	NA	NA	NA	NA	NA	NA	NA	5	6	5,5	100	6	Female	-0,494060876020788	T3	1,12047141796585	-5,03789903489235	-0,893615441722346	juni	6	5	Week	Friday	68	-4,39792130660727	0	Control	Control
33	primary	new	300	Control	3985	0	10	0	5	2018-03-09	2	1	9001	16	observed	6,5	5,8	5,1	-0,144689000105927	5,2	0,863993989782798	7	7	7	6	6	1	1	6	6	6	100	6	Male	-1,49406087602079	T1	-5,67952858203415	-0,737899034892354	4,20638455827765	maart	3	5	Week	Friday	82	9,60207869339273	0	Control	Control
33	primary	new	300	Control	3985	0	10	0	5	2018-03-12	5	1	13332	75	observed	10,3	2,6	1,8	-0,144689000105927	5,2	0,863993989782798	7	7	7	6	6	1	1	6	6	6	100	6	Male	-1,49406087602079	T1	-1,87952858203415	-3,93789903489235	0,906384558277654	maart	3	1	Week	Monday	85	12,6020786933927	0	Control	Control
33	primary	new	300	Control	3985	0	10	0	6	2018-05-28	5	1	2088	0	observed	22,5	11,6	0,3	-0,144689000105927	5,2	0,863993989782798	4	3	3	4,5	NA	NA	NA	6	6	6	100	6	Male	-1,49406087602079	T2	10,3204714179658	5,06210096510765	-0,593615441722346	mei	5	1	Week	Monday	69	-3,39792130660727	0	Control	Control
33	primary	new	300	Control	3992	0	10	0	6	2018-05-25	2	1	13236	82	observed	20,6	10,5	0	0,515899839408567	4,9	0,563993989782798	6	5	5	4	4,67	1,67	2	4	5	4,5	52	3,6	Male	-1,49406087602079	T2	8,42047141796585	3,96210096510765	-0,893615441722346	mei	5	5	Week	Friday	73	0,602078693392727	0	Control	Control
33	primary	new	300	Control	3991	1	11	0	6	2018-05-24	1	1	4295	9	observed	18,3	3,1	0,7	-1,22814407120897	2,7	-1,6360060102172	NA	NA	NA	NA	NA	NA	NA	4	3	3,5	59	3,95	Female	-0,494060876020788	T2	6,12047141796585	-3,43789903489235	-0,193615441722346	mei	5	4	Week	Thursday	69	-3,39792130660727	0	Control	Control
33	primary	new	300	Control	3991	1	11	0	6	2018-05-26	3	1	6091	24	observed	23	11,9	0	-1,22814407120897	2,7	-1,6360060102172	NA	NA	NA	NA	NA	NA	NA	4	3	3,5	59	3,95	Female	-0,494060876020788	T2	10,8204714179658	5,36210096510765	-0,893615441722346	mei	5	6	Weekend	Saturday	59	-13,3979213066073	0	Control	Control
33	primary	new	300	Control	3991	1	11	0	6	2018-05-25	2	1	8612	34	observed	20,6	10,5	0	-1,22814407120897	2,7	-1,6360060102172	NA	NA	NA	NA	NA	NA	NA	4	3	3,5	59	3,95	Female	-0,494060876020788	T2	8,42047141796585	3,96210096510765	-0,893615441722346	mei	5	5	Week	Friday	73	0,602078693392727	0	Control	Control
33	primary	new	300	Control	3991	1	11	0	7	2018-06-25	5	1	2152	0	observed	16,5	9,6	0	-1,22814407120897	2,7	-1,6360060102172	NA	NA	NA	NA	NA	NA	NA	NA	NA	NA	85	5,25	Female	-0,494060876020788	T3	4,32047141796585	3,06210096510765	-0,893615441722346	juni	6	1	Week	Monday	75	2,60207869339273	0	Control	Control
33	primary	new	300	Control	3991	1	11	0	7	2018-06-22	2	1	5562	0	observed	13,3	1,5	0	-1,22814407120897	2,7	-1,6360060102172	NA	NA	NA	NA	NA	NA	NA	NA	NA	NA	85	5,25	Female	-0,494060876020788	T3	1,12047141796585	-5,03789903489235	-0,893615441722346	juni	6	5	Week	Friday	68	-4,39792130660727	0	Control	Control
33	primary	new	300	Control	3991	1	11	0	7	2018-06-21	1	1	2291	10	observed	14,4	8,1	0	-1,22814407120897	2,7	-1,6360060102172	NA	NA	NA	NA	NA	NA	NA	NA	NA	NA	85	5,25	Female	-0,494060876020788	T3	2,22047141796585	1,56210096510765	-0,893615441722346	juni	6	4	Week	Thursday	68	-4,39792130660727	0	Control	Control
33	primary	new	300	Control	3991	1	11	0	7	2018-06-23	3	1	8928	52	observed	15,1	4,9	0	-1,22814407120897	2,7	-1,6360060102172	NA	NA	NA	NA	NA	NA	NA	NA	NA	NA	85	5,25	Female	-0,494060876020788	T3	2,92047141796585	-1,63789903489235	-0,893615441722346	juni	6	6	Weekend	Saturday	71	-1,39792130660727	0	Control	Control
33	primary	new	300	Control	3991	1	11	0	7	2018-06-24	4	1	3555	9	observed	14,7	0,7	0	-1,22814407120897	2,7	-1,6360060102172	NA	NA	NA	NA	NA	NA	NA	NA	NA	NA	85	5,25	Female	-0,494060876020788	T3	2,52047141796585	-5,83789903489235	-0,893615441722346	juni	6	0	Weekend	Sunday	78	5,60207869339273	0	Control	Control
33	primary	new	300	Control	3992	0	10	0	5	2018-03-08	1	1	10108	77	observed	4,8	2	3,2	0,515899839408567	4,9	0,563993989782798	3	2	2	5	4,67	2,33	1,33	4	5	4,5	99	5,95	Male	-1,49406087602079	T1	-7,37952858203415	-4,53789903489235	2,30638455827765	maart	3	4	Week	Thursday	84	11,6020786933927	0	Control	Control
33	primary	new	300	Control	3979	1	11	0	6	2018-05-24	1	1	10914	7	observed	18,3	3,1	0,7	0,609326812759948	5	0,663993989782798	5	4	2	5	6	1	1,33	5	6	5,5	100	6	Female	-0,494060876020788	T2	6,12047141796585	-3,43789903489235	-0,193615441722346	mei	5	4	Week	Thursday	69	-3,39792130660727	0	Control	Control
33	primary	new	300	Control	3979	1	11	0	6	2018-05-25	2	1	10921	10	observed	20,6	10,5	0	0,609326812759948	5	0,663993989782798	5	4	2	5	6	1	1,33	5	6	5,5	100	6	Female	-0,494060876020788	T2	8,42047141796585	3,96210096510765	-0,893615441722346	mei	5	5	Week	Friday	73	0,602078693392727	0	Control	Control
33	primary	new	300	Control	3988	0	10	0	6	2018-05-27	4	1	5459	12	observed	20,3	3,1	1,9	0,200148000849779	5,4	1,0639939897828	3	2	2	6	6	1	1	6	6	6	100	6	Male	-1,49406087602079	T2	8,12047141796585	-3,43789903489235	1,00638455827765	mei	5	0	Weekend	Sunday	71	-1,39792130660727	0	Control	Control
33	primary	new	300	Control	3985	0	10	0	6	2018-05-27	4	1	2175	0	observed	20,3	3,1	1,9	-0,144689000105927	5,2	0,863993989782798	4	3	3	4,5	NA	NA	NA	6	6	6	100	6	Male	-1,49406087602079	T2	8,12047141796585	-3,43789903489235	1,00638455827765	mei	5	0	Weekend	Sunday	71	-1,39792130660727	0	Control	Control
33	primary	new	300	Control	3985	0	10	0	6	2018-05-24	1	1	2282	0	observed	18,3	3,1	0,7	-0,144689000105927	5,2	0,863993989782798	4	3	3	4,5	NA	NA	NA	6	6	6	100	6	Male	-1,49406087602079	T2	6,12047141796585	-3,43789903489235	-0,193615441722346	mei	5	4	Week	Thursday	69	-3,39792130660727	0	Control	Control
33	primary	new	300	Control	3985	0	10	0	6	2018-05-26	3	1	1588	0	observed	23	11,9	0	-0,144689000105927	5,2	0,863993989782798	4	3	3	4,5	NA	NA	NA	6	6	6	100	6	Male	-1,49406087602079	T2	10,8204714179658	5,36210096510765	-0,893615441722346	mei	5	6	Weekend	Saturday	59	-13,3979213066073	0	Control	Control
33	primary	new	300	Control	3985	0	10	0	6	2018-05-25	2	1	11579	34	imputed	20,6	10,5	0	-0,144689000105927	5,2	0,863993989782798	4	3	3	4,5	NA	NA	NA	6	6	6	100	6	Male	-1,49406087602079	T2	8,42047141796585	3,96210096510765	-0,893615441722346	mei	5	5	Week	Friday	73	0,602078693392727	0	Control	Control
33	primary	new	300	Control	3985	0	11	0	7	2018-06-21	1	1	15643	69	observed	14,4	8,1	0	-0,144689000105927	5,2	0,863993989782798	NA	NA	NA	NA	NA	NA	NA	NA	NA	NA	97	5,85	Male	-0,494060876020788	T3	2,22047141796585	1,56210096510765	-0,893615441722346	juni	6	4	Week	Thursday	68	-4,39792130660727	0	Control	Control
33	primary	new	300	Control	3985	0	11	0	7	2018-06-23	3	1	8864	41	imputed	15,1	4,9	0	-0,144689000105927	5,2	0,863993989782798	NA	NA	NA	NA	NA	NA	NA	NA	NA	NA	97	5,85	Male	-0,494060876020788	T3	2,92047141796585	-1,63789903489235	-0,893615441722346	juni	6	6	Weekend	Saturday	71	-1,39792130660727	0	Control	Control
33	primary	new	300	Control	3992	0	10	0	7	2018-06-22	2	1	1000	49	imputed	13,3	1,5	0	0,515899839408567	4,9	0,563993989782798	NA	NA	NA	NA	NA	NA	NA	NA	NA	NA	NA	NA	Male	-1,49406087602079	T3	1,12047141796585	-5,03789903489235	-0,893615441722346	juni	6	5	Week	Friday	68	-4,39792130660727	0	Control	Control
33	primary	new	300	Control	3982	1	10	0	7	2018-06-21	1	1	10844	15	observed	14,4	8,1	0	0,700043674920996	4,3	-0,0360060102172026	NA	NA	NA	NA	NA	NA	NA	6	6	6	100	6	Female	-1,49406087602079	T3	2,22047141796585	1,56210096510765	-0,893615441722346	juni	6	4	Week	Thursday	68	-4,39792130660727	0	Control	Control
33	primary	new	300	Control	3983	0	11	0	5	2018-03-10	3	1	10832	0	imputed	11,4	1,8	6,6	-0,012442505036207	5,8	1,4639939897828	4	4	0	5,5	6	1,67	1	6	6	6	100	6	Male	-0,494060876020788	T1	-0,77952858203415	-4,73789903489235	5,70638455827765	maart	3	6	Weekend	Saturday	89	16,6020786933927	0	Control	Control
33	primary	new	300	Control	3983	0	11	0	5	2018-03-09	2	1	2185	0	observed	6,5	5,8	5,1	-0,012442505036207	5,8	1,4639939897828	4	4	0	5,5	6	1,67	1	6	6	6	100	6	Male	-0,494060876020788	T1	-5,67952858203415	-0,737899034892354	4,20638455827765	maart	3	5	Week	Friday	82	9,60207869339273	0	Control	Control
33	primary	new	300	Control	265	1	11	0	7	2018-06-21	1	1	13695	78	observed	14,4	8,1	0	0,851212499027612	5,55192232408857	1,21591631387136	NA	NA	NA	NA	NA	NA	NA	5	6	5,5	100	6	Female	-0,494060876020788	T3	2,22047141796585	1,56210096510765	-0,893615441722346	juni	6	4	Week	Thursday	68	-4,39792130660727	0	Control	Control
33	primary	new	300	Control	265	1	11	0	7	2018-06-23	3	1	13173	61	imputed	15,1	4,9	0	0,851212499027612	5,55192232408857	1,21591631387136	NA	NA	NA	NA	NA	NA	NA	5	6	5,5	100	6	Female	-0,494060876020788	T3	2,92047141796585	-1,63789903489235	-0,893615441722346	juni	6	6	Weekend	Saturday	71	-1,39792130660727	0	Control	Control
33	primary	new	300	Control	3979	1	11	0	6	2018-05-28	5	1	8375	0	observed	22,5	11,6	0,3	0,609326812759948	5	0,663993989782798	5	4	2	5	6	1	1,33	5	6	5,5	100	6	Female	-0,494060876020788	T2	10,3204714179658	5,06210096510765	-0,593615441722346	mei	5	1	Week	Monday	69	-3,39792130660727	0	Control	Control
33	primary	new	300	Control	3993	0	11	0	6	2018-05-26	3	1	4086	15	observed	23	11,9	0	0,669677866073038	3,9	-0,436006010217202	1	3	1	5,5	6	6	2	6	6	6	100	6	Male	-0,494060876020788	T2	10,8204714179658	5,36210096510765	-0,893615441722346	mei	5	6	Weekend	Saturday	59	-13,3979213066073	0	Control	Control
33	primary	new	300	Control	3993	0	11	0	6	2018-05-27	4	1	4436	15	observed	20,3	3,1	1,9	0,669677866073038	3,9	-0,436006010217202	1	3	1	5,5	6	6	2	6	6	6	100	6	Male	-0,494060876020788	T2	8,12047141796585	-3,43789903489235	1,00638455827765	mei	5	0	Weekend	Sunday	71	-1,39792130660727	0	Control	Control
33	primary	new	300	Control	3993	0	11	0	6	2018-05-28	5	1	11261	87	observed	22,5	11,6	0,3	0,669677866073038	3,9	-0,436006010217202	1	3	1	5,5	6	6	2	6	6	6	100	6	Male	-0,494060876020788	T2	10,3204714179658	5,06210096510765	-0,593615441722346	mei	5	1	Week	Monday	69	-3,39792130660727	0	Control	Control
33	primary	new	300	Control	3993	0	11	0	6	2018-05-25	2	1	11474	67	observed	20,6	10,5	0	0,669677866073038	3,9	-0,436006010217202	1	3	1	5,5	6	6	2	6	6	6	100	6	Male	-0,494060876020788	T2	8,42047141796585	3,96210096510765	-0,893615441722346	mei	5	5	Week	Friday	73	0,602078693392727	0	Control	Control
33	primary	new	300	Control	3988	0	10	0	7	2018-06-25	5	1	15059	62	observed	16,5	9,6	0	0,200148000849779	5,4	1,0639939897828	3	2	2	6	5,67	1,33	1	6	6	6	100	6	Male	-1,49406087602079	T3	4,32047141796585	3,06210096510765	-0,893615441722346	juni	6	1	Week	Monday	75	2,60207869339273	0	Control	Control
33	primary	new	300	Control	3988	0	10	0	7	2018-06-24	4	1	7809	43	observed	14,7	0,7	0	0,200148000849779	5,4	1,0639939897828	3	2	2	6	5,67	1,33	1	6	6	6	100	6	Male	-1,49406087602079	T3	2,52047141796585	-5,83789903489235	-0,893615441722346	juni	6	0	Weekend	Sunday	78	5,60207869339273	0	Control	Control
33	primary	new	300	Control	3988	0	10	0	7	2018-06-22	2	1	14766	81	observed	13,3	1,5	0	0,200148000849779	5,4	1,0639939897828	3	2	2	6	5,67	1,33	1	6	6	6	100	6	Male	-1,49406087602079	T3	1,12047141796585	-5,03789903489235	-0,893615441722346	juni	6	5	Week	Friday	68	-4,39792130660727	0	Control	Control
33	primary	new	300	Control	3993	0	11	0	7	2018-06-23	3	1	5601	24	observed	15,1	4,9	0	0,669677866073038	3,9	-0,436006010217202	1	1	1	6	6	6	3	4	3	3,5	100	6	Male	-0,494060876020788	T3	2,92047141796585	-1,63789903489235	-0,893615441722346	juni	6	6	Weekend	Saturday	71	-1,39792130660727	0	Control	Control
33	primary	new	300	Control	3993	0	11	0	7	2018-06-22	2	1	12363	59	observed	13,3	1,5	0	0,669677866073038	3,9	-0,436006010217202	1	1	1	6	6	6	3	4	3	3,5	100	6	Male	-0,494060876020788	T3	1,12047141796585	-5,03789903489235	-0,893615441722346	juni	6	5	Week	Friday	68	-4,39792130660727	0	Control	Control
33	primary	new	300	Control	3991	1	11	0	5	2018-03-10	3	1	6255	15	observed	11,4	1,8	6,6	-1,22814407120897	2,7	-1,6360060102172	0	2	0	4	3	1	1	6	6	6	74	4,7	Female	-0,494060876020788	T1	-0,77952858203415	-4,73789903489235	5,70638455827765	maart	3	6	Weekend	Saturday	89	16,6020786933927	0	Control	Control
33	primary	new	300	Control	3991	1	11	0	5	2018-03-09	2	1	4132	0	observed	6,5	5,8	5,1	-1,22814407120897	2,7	-1,6360060102172	0	2	0	4	3	1	1	6	6	6	74	4,7	Female	-0,494060876020788	T1	-5,67952858203415	-0,737899034892354	4,20638455827765	maart	3	5	Week	Friday	82	9,60207869339273	0	Control	Control
33	primary	new	300	Control	3991	1	11	0	5	2018-03-11	4	1	4693	20	observed	10,2	2,5	1	-1,22814407120897	2,7	-1,6360060102172	0	2	0	4	3	1	1	6	6	6	74	4,7	Female	-0,494060876020788	T1	-1,97952858203415	-4,03789903489235	0,106384558277654	maart	3	0	Weekend	Sunday	91	18,6020786933927	0	Control	Control
33	primary	new	300	Control	3991	1	11	0	5	2018-03-12	5	1	4963	8	observed	10,3	2,6	1,8	-1,22814407120897	2,7	-1,6360060102172	0	2	0	4	3	1	1	6	6	6	74	4,7	Female	-0,494060876020788	T1	-1,87952858203415	-3,93789903489235	0,906384558277654	maart	3	1	Week	Monday	85	12,6020786933927	0	Control	Control
33	primary	new	300	Control	3991	1	11	0	5	2018-03-08	1	1	3881	0	observed	4,8	2	3,2	-1,22814407120897	2,7	-1,6360060102172	0	2	0	4	3	1	1	6	6	6	74	4,7	Female	-0,494060876020788	T1	-7,37952858203415	-4,53789903489235	2,30638455827765	maart	3	4	Week	Thursday	84	11,6020786933927	0	Control	Control
33	primary	new	300	Control	3972	0	11	0	6	2018-05-24	1	1	8862	0	imputed	18,3	3,1	0,7	-0,402523852402388	4,54327094812325	0,207264937906045	NA	NA	NA	NA	NA	NA	NA	NA	NA	NA	100	6	Male	-0,494060876020788	T2	6,12047141796585	-3,43789903489235	-0,193615441722346	mei	5	4	Week	Thursday	69	-3,39792130660727	0	Control	Control
33	primary	new	300	Control	3972	0	11	0	6	2018-05-26	3	1	6533	56	imputed	23	11,9	0	-0,402523852402388	4,54327094812325	0,207264937906045	NA	NA	NA	NA	NA	NA	NA	NA	NA	NA	100	6	Male	-0,494060876020788	T2	10,8204714179658	5,36210096510765	-0,893615441722346	mei	5	6	Weekend	Saturday	59	-13,3979213066073	0	Control	Control
33	primary	new	300	Control	3972	0	11	0	6	2018-05-25	2	1	10271	10	imputed	20,6	10,5	0	-0,402523852402388	4,54327094812325	0,207264937906045	NA	NA	NA	NA	NA	NA	NA	NA	NA	NA	100	6	Male	-0,494060876020788	T2	8,42047141796585	3,96210096510765	-0,893615441722346	mei	5	5	Week	Friday	73	0,602078693392727	0	Control	Control
33	primary	new	300	Control	3972	0	11	0	7	2018-06-23	3	1	4463	14	imputed	15,1	4,9	0	-0,402523852402388	4,54327094812325	0,207264937906045	NA	NA	NA	NA	NA	NA	NA	NA	NA	NA	NA	NA	Male	-0,494060876020788	T3	2,92047141796585	-1,63789903489235	-0,893615441722346	juni	6	6	Weekend	Saturday	71	-1,39792130660727	0	Control	Control
33	primary	new	300	Control	3972	0	11	0	7	2018-06-21	1	1	7188	67	imputed	14,4	8,1	0	-0,402523852402388	4,54327094812325	0,207264937906045	NA	NA	NA	NA	NA	NA	NA	NA	NA	NA	NA	NA	Male	-0,494060876020788	T3	2,22047141796585	1,56210096510765	-0,893615441722346	juni	6	4	Week	Thursday	68	-4,39792130660727	0	Control	Control
33	primary	new	300	Control	3972	0	11	0	7	2018-06-22	2	1	3206	0	imputed	13,3	1,5	0	-0,402523852402388	4,54327094812325	0,207264937906045	NA	NA	NA	NA	NA	NA	NA	NA	NA	NA	NA	NA	Male	-0,494060876020788	T3	1,12047141796585	-5,03789903489235	-0,893615441722346	juni	6	5	Week	Friday	68	-4,39792130660727	0	Control	Control
33	primary	new	300	Control	3973	1	10	0	5	2018-03-09	2	1	1310	0	observed	6,5	5,8	5,1	0,403287378923162	4,9	0,563993989782798	3	1	2	4,5	5	1	1	6	6	6	75	4,75	Female	-1,49406087602079	T1	-5,67952858203415	-0,737899034892354	4,20638455827765	maart	3	5	Week	Friday	82	9,60207869339273	0	Control	Control
33	primary	new	300	Control	3973	1	10	0	5	2018-03-10	3	1	4332	4	imputed	11,4	1,8	6,6	0,403287378923162	4,9	0,563993989782798	3	1	2	4,5	5	1	1	6	6	6	75	4,75	Female	-1,49406087602079	T1	-0,77952858203415	-4,73789903489235	5,70638455827765	maart	3	6	Weekend	Saturday	89	16,6020786933927	0	Control	Control
33	primary	new	300	Control	3973	1	10	0	5	2018-03-08	1	1	1329	0	observed	4,8	2	3,2	0,403287378923162	4,9	0,563993989782798	3	1	2	4,5	5	1	1	6	6	6	75	4,75	Female	-1,49406087602079	T1	-7,37952858203415	-4,53789903489235	2,30638455827765	maart	3	4	Week	Thursday	84	11,6020786933927	0	Control	Control
33	primary	new	300	Control	3973	1	10	0	6	2018-05-26	3	1	10318	12	imputed	23	11,9	0	0,403287378923162	4,9	0,563993989782798	NA	NA	NA	NA	NA	NA	NA	NA	NA	NA	84	5,2	Female	-1,49406087602079	T2	10,8204714179658	5,36210096510765	-0,893615441722346	mei	5	6	Weekend	Saturday	59	-13,3979213066073	0	Control	Control
33	primary	new	300	Control	3973	1	10	0	6	2018-05-24	1	1	5787	33	observed	18,3	3,1	0,7	0,403287378923162	4,9	0,563993989782798	NA	NA	NA	NA	NA	NA	NA	NA	NA	NA	84	5,2	Female	-1,49406087602079	T2	6,12047141796585	-3,43789903489235	-0,193615441722346	mei	5	4	Week	Thursday	69	-3,39792130660727	0	Control	Control
33	primary	new	300	Control	3973	1	10	0	6	2018-05-25	2	1	3995	27	imputed	20,6	10,5	0	0,403287378923162	4,9	0,563993989782798	NA	NA	NA	NA	NA	NA	NA	NA	NA	NA	84	5,2	Female	-1,49406087602079	T2	8,42047141796585	3,96210096510765	-0,893615441722346	mei	5	5	Week	Friday	73	0,602078693392727	0	Control	Control
33	primary	new	300	Control	3973	1	10	0	7	2018-06-22	2	1	10408	122	imputed	13,3	1,5	0	0,403287378923162	4,9	0,563993989782798	NA	NA	NA	NA	NA	NA	NA	NA	NA	NA	100	6	Female	-1,49406087602079	T3	1,12047141796585	-5,03789903489235	-0,893615441722346	juni	6	5	Week	Friday	68	-4,39792130660727	0	Control	Control
33	primary	new	300	Control	3979	1	11	0	6	2018-05-27	4	1	13761	33	observed	20,3	3,1	1,9	0,609326812759948	5	0,663993989782798	5	4	2	5	6	1	1,33	5	6	5,5	100	6	Female	-0,494060876020788	T2	8,12047141796585	-3,43789903489235	1,00638455827765	mei	5	0	Weekend	Sunday	71	-1,39792130660727	0	Control	Control
33	primary	new	300	Control	3979	1	11	0	7	2018-06-21	1	1	12165	26	observed	14,4	8,1	0	0,609326812759948	5	0,663993989782798	4	3	3	5,5	6	1	1,67	5	6	5,5	100	6	Female	-0,494060876020788	T3	2,22047141796585	1,56210096510765	-0,893615441722346	juni	6	4	Week	Thursday	68	-4,39792130660727	0	Control	Control
33	primary	new	300	Control	3979	1	11	0	7	2018-06-24	4	1	8793	42	observed	14,7	0,7	0	0,609326812759948	5	0,663993989782798	4	3	3	5,5	6	1	1,67	5	6	5,5	100	6	Female	-0,494060876020788	T3	2,52047141796585	-5,83789903489235	-0,893615441722346	juni	6	0	Weekend	Sunday	78	5,60207869339273	0	Control	Control
33	primary	new	300	Control	3979	1	11	0	7	2018-06-22	2	1	14218	40	observed	13,3	1,5	0	0,609326812759948	5	0,663993989782798	4	3	3	5,5	6	1	1,67	5	6	5,5	100	6	Female	-0,494060876020788	T3	1,12047141796585	-5,03789903489235	-0,893615441722346	juni	6	5	Week	Friday	68	-4,39792130660727	0	Control	Control
33	primary	new	300	Control	265	1	11	0	5	2018-03-09	2	1	1719	0	observed	6,5	5,8	5,1	0,851212499027612	5,55192232408857	1,21591631387136	NA	NA	NA	4	6	1,33	1	NA	NA	NA	100	6	Female	-0,494060876020788	T1	-5,67952858203415	-0,737899034892354	4,20638455827765	maart	3	5	Week	Friday	82	9,60207869339273	0	Control	Control
33	primary	new	300	Control	265	1	11	0	5	2018-03-10	3	1	2744	0	observed	11,4	1,8	6,6	0,851212499027612	5,55192232408857	1,21591631387136	NA	NA	NA	4	6	1,33	1	NA	NA	NA	100	6	Female	-0,494060876020788	T1	-0,77952858203415	-4,73789903489235	5,70638455827765	maart	3	6	Weekend	Saturday	89	16,6020786933927	0	Control	Control
33	primary	new	300	Control	265	1	11	0	6	2018-05-25	2	1	8266	42	imputed	20,6	10,5	0	0,851212499027612	5,55192232408857	1,21591631387136	NA	NA	NA	NA	NA	NA	NA	NA	NA	NA	80	5	Female	-0,494060876020788	T2	8,42047141796585	3,96210096510765	-0,893615441722346	mei	5	5	Week	Friday	73	0,602078693392727	0	Control	Control
33	primary	new	300	Control	3985	0	11	0	7	2018-06-22	2	1	7954	31	observed	13,3	1,5	0	-0,144689000105927	5,2	0,863993989782798	NA	NA	NA	NA	NA	NA	NA	NA	NA	NA	97	5,85	Male	-0,494060876020788	T3	1,12047141796585	-5,03789903489235	-0,893615441722346	juni	6	5	Week	Friday	68	-4,39792130660727	0	Control	Control
33	primary	new	300	Control	3988	0	10	0	5	2018-03-09	2	1	15969	98	observed	6,5	5,8	5,1	0,200148000849779	5,4	1,0639939897828	7	4	6	5,5	5	1,33	1	6	4	5	100	6	Male	-1,49406087602079	T1	-5,67952858203415	-0,737899034892354	4,20638455827765	maart	3	5	Week	Friday	82	9,60207869339273	0	Control	Control
33	primary	new	300	Control	3988	0	10	0	5	2018-03-12	5	1	19104	129	observed	10,3	2,6	1,8	0,200148000849779	5,4	1,0639939897828	7	4	6	5,5	5	1,33	1	6	4	5	100	6	Male	-1,49406087602079	T1	-1,87952858203415	-3,93789903489235	0,906384558277654	maart	3	1	Week	Monday	85	12,6020786933927	0	Control	Control
33	primary	new	300	Control	3988	0	10	0	5	2018-03-11	4	1	14551	113	observed	10,2	2,5	1	0,200148000849779	5,4	1,0639939897828	7	4	6	5,5	5	1,33	1	6	4	5	100	6	Male	-1,49406087602079	T1	-1,97952858203415	-4,03789903489235	0,106384558277654	maart	3	0	Weekend	Sunday	91	18,6020786933927	0	Control	Control
33	primary	new	300	Control	3988	0	10	0	5	2018-03-08	1	1	13045	77	observed	4,8	2	3,2	0,200148000849779	5,4	1,0639939897828	7	4	6	5,5	5	1,33	1	6	4	5	100	6	Male	-1,49406087602079	T1	-7,37952858203415	-4,53789903489235	2,30638455827765	maart	3	4	Week	Thursday	84	11,6020786933927	0	Control	Control
33	primary	new	300	Control	3993	0	11	0	5	2018-03-11	4	1	3195	0	observed	10,2	2,5	1	0,669677866073038	3,9	-0,436006010217202	2	1	1	4,5	6	4,33	2,33	6	3	4,5	100	6	Male	-0,494060876020788	T1	-1,97952858203415	-4,03789903489235	0,106384558277654	maart	3	0	Weekend	Sunday	91	18,6020786933927	0	Control	Control
33	primary	new	300	Control	3988	0	10	0	6	2018-05-25	2	1	11001	46	observed	20,6	10,5	0	0,200148000849779	5,4	1,0639939897828	3	2	2	6	6	1	1	6	6	6	100	6	Male	-1,49406087602079	T2	8,42047141796585	3,96210096510765	-0,893615441722346	mei	5	5	Week	Friday	73	0,602078693392727	0	Control	Control
33	primary	new	300	Control	3975	1	11	0	7	2018-06-23	3	1	12296	64	observed	15,1	4,9	0	1,07658821276943	5	0,663993989782798	7	7	7	6	6	1	1	6	6	6	93	5,65	Female	-0,494060876020788	T3	2,92047141796585	-1,63789903489235	-0,893615441722346	juni	6	6	Weekend	Saturday	71	-1,39792130660727	0	Control	Control
33	primary	new	300	Control	3975	1	11	0	7	2018-06-21	1	1	17046	78	observed	14,4	8,1	0	1,07658821276943	5	0,663993989782798	7	7	7	6	6	1	1	6	6	6	93	5,65	Female	-0,494060876020788	T3	2,22047141796585	1,56210096510765	-0,893615441722346	juni	6	4	Week	Thursday	68	-4,39792130660727	0	Control	Control
33	primary	new	300	Control	3975	1	11	0	7	2018-06-25	5	1	13917	53	observed	16,5	9,6	0	1,07658821276943	5	0,663993989782798	7	7	7	6	6	1	1	6	6	6	93	5,65	Female	-0,494060876020788	T3	4,32047141796585	3,06210096510765	-0,893615441722346	juni	6	1	Week	Monday	75	2,60207869339273	0	Control	Control
33	primary	new	300	Control	3993	0	11	0	6	2018-05-24	1	1	8918	45	observed	18,3	3,1	0,7	0,669677866073038	3,9	-0,436006010217202	1	3	1	5,5	6	6	2	6	6	6	100	6	Male	-0,494060876020788	T2	6,12047141796585	-3,43789903489235	-0,193615441722346	mei	5	4	Week	Thursday	69	-3,39792130660727	0	Control	Control
33	primary	new	300	Control	3993	0	11	0	7	2018-06-25	5	1	16945	142	observed	16,5	9,6	0	0,669677866073038	3,9	-0,436006010217202	1	1	1	6	6	6	3	4	3	3,5	100	6	Male	-0,494060876020788	T3	4,32047141796585	3,06210096510765	-0,893615441722346	juni	6	1	Week	Monday	75	2,60207869339273	0	Control	Control
33	primary	new	300	Control	3993	0	11	0	7	2018-06-21	1	1	1947	0	observed	14,4	8,1	0	0,669677866073038	3,9	-0,436006010217202	1	1	1	6	6	6	3	4	3	3,5	100	6	Male	-0,494060876020788	T3	2,22047141796585	1,56210096510765	-0,893615441722346	juni	6	4	Week	Thursday	68	-4,39792130660727	0	Control	Control
33	primary	new	300	Control	3980	1	10	0	7	2018-06-25	5	1	11528	48	observed	16,5	9,6	0	-0,0274149971739208	5,65	1,3139939897828	7	5	7	4,5	6	1	1	6	6	6	100	6	Female	-1,49406087602079	T3	4,32047141796585	3,06210096510765	-0,893615441722346	juni	6	1	Week	Monday	75	2,60207869339273	0	Control	Control
33	primary	new	300	Control	3981	1	10	0	5	2018-03-09	2	1	5530	14	observed	6,5	5,8	5,1	-1,3922394447799	3,9	-0,436006010217203	2	3	4	5	6	1	1	6	6	6	100	6	Female	-1,49406087602079	T1	-5,67952858203415	-0,737899034892354	4,20638455827765	maart	3	5	Week	Friday	82	9,60207869339273	0	Control	Control
33	primary	new	300	Control	3981	1	10	0	5	2018-03-12	5	1	9142	22	observed	10,3	2,6	1,8	-1,3922394447799	3,9	-0,436006010217203	2	3	4	5	6	1	1	6	6	6	100	6	Female	-1,49406087602079	T1	-1,87952858203415	-3,93789903489235	0,906384558277654	maart	3	1	Week	Monday	85	12,6020786933927	0	Control	Control
33	primary	new	300	Control	3981	1	10	0	5	2018-03-08	1	1	6747	23	observed	4,8	2	3,2	-1,3922394447799	3,9	-0,436006010217203	2	3	4	5	6	1	1	6	6	6	100	6	Female	-1,49406087602079	T1	-7,37952858203415	-4,53789903489235	2,30638455827765	maart	3	4	Week	Thursday	84	11,6020786933927	0	Control	Control
33	primary	new	300	Control	3981	1	10	0	5	2018-03-11	4	1	8925	25	observed	10,2	2,5	1	-1,3922394447799	3,9	-0,436006010217203	2	3	4	5	6	1	1	6	6	6	100	6	Female	-1,49406087602079	T1	-1,97952858203415	-4,03789903489235	0,106384558277654	maart	3	0	Weekend	Sunday	91	18,6020786933927	0	Control	Control
33	primary	new	300	Control	3981	1	10	0	5	2018-03-10	3	1	13148	71	observed	11,4	1,8	6,6	-1,3922394447799	3,9	-0,436006010217203	2	3	4	5	6	1	1	6	6	6	100	6	Female	-1,49406087602079	T1	-0,77952858203415	-4,73789903489235	5,70638455827765	maart	3	6	Weekend	Saturday	89	16,6020786933927	0	Control	Control
33	primary	new	300	Control	3981	1	10	0	6	2018-05-25	2	1	6758	17	observed	20,6	10,5	0	-1,3922394447799	3,9	-0,436006010217203	3	2	3	4,5	6	1	1	5	5	5	97	5,85	Female	-1,49406087602079	T2	8,42047141796585	3,96210096510765	-0,893615441722346	mei	5	5	Week	Friday	73	0,602078693392727	0	Control	Control
33	primary	new	300	Control	3981	1	10	0	6	2018-05-26	3	1	13741	28	imputed	23	11,9	0	-1,3922394447799	3,9	-0,436006010217203	3	2	3	4,5	6	1	1	5	5	5	97	5,85	Female	-1,49406087602079	T2	10,8204714179658	5,36210096510765	-0,893615441722346	mei	5	6	Weekend	Saturday	59	-13,3979213066073	0	Control	Control
33	primary	new	300	Control	3981	1	10	0	6	2018-05-24	1	1	9475	40	observed	18,3	3,1	0,7	-1,3922394447799	3,9	-0,436006010217203	3	2	3	4,5	6	1	1	5	5	5	97	5,85	Female	-1,49406087602079	T2	6,12047141796585	-3,43789903489235	-0,193615441722346	mei	5	4	Week	Thursday	69	-3,39792130660727	0	Control	Control
33	primary	new	300	Control	3981	1	10	0	7	2018-06-25	5	1	9537	20	observed	16,5	9,6	0	-1,3922394447799	3,9	-0,436006010217203	5	5	5	2	2,33	2,67	2,33	3	5	4	100	6	Female	-1,49406087602079	T3	4,32047141796585	3,06210096510765	-0,893615441722346	juni	6	1	Week	Monday	75	2,60207869339273	0	Control	Control
33	primary	new	300	Control	3981	1	10	0	7	2018-06-24	4	1	3924	0	observed	14,7	0,7	0	-1,3922394447799	3,9	-0,436006010217203	5	5	5	2	2,33	2,67	2,33	3	5	4	100	6	Female	-1,49406087602079	T3	2,52047141796585	-5,83789903489235	-0,893615441722346	juni	6	0	Weekend	Sunday	78	5,60207869339273	0	Control	Control
33	primary	new	300	Control	3979	1	10	0	5	2018-03-12	5	1	15763	87	observed	10,3	2,6	1,8	0,609326812759948	5	0,663993989782798	4	3	3	5	5	1,33	1	5	6	5,5	100	6	Female	-1,49406087602079	T1	-1,87952858203415	-3,93789903489235	0,906384558277654	maart	3	1	Week	Monday	85	12,6020786933927	0	Control	Control
33	primary	new	300	Control	3979	1	10	0	5	2018-03-11	4	1	7019	7	observed	10,2	2,5	1	0,609326812759948	5	0,663993989782798	4	3	3	5	5	1,33	1	5	6	5,5	100	6	Female	-1,49406087602079	T1	-1,97952858203415	-4,03789903489235	0,106384558277654	maart	3	0	Weekend	Sunday	91	18,6020786933927	0	Control	Control
33	primary	new	300	Control	3979	1	10	0	5	2018-03-08	1	1	10617	45	observed	4,8	2	3,2	0,609326812759948	5	0,663993989782798	4	3	3	5	5	1,33	1	5	6	5,5	100	6	Female	-1,49406087602079	T1	-7,37952858203415	-4,53789903489235	2,30638455827765	maart	3	4	Week	Thursday	84	11,6020786933927	0	Control	Control
33	primary	new	300	Control	3979	1	10	0	5	2018-03-09	2	1	10944	44	observed	6,5	5,8	5,1	0,609326812759948	5	0,663993989782798	4	3	3	5	5	1,33	1	5	6	5,5	100	6	Female	-1,49406087602079	T1	-5,67952858203415	-0,737899034892354	4,20638455827765	maart	3	5	Week	Friday	82	9,60207869339273	0	Control	Control
33	primary	new	300	Control	3979	1	10	0	5	2018-03-10	3	1	8111	9	observed	11,4	1,8	6,6	0,609326812759948	5	0,663993989782798	4	3	3	5	5	1,33	1	5	6	5,5	100	6	Female	-1,49406087602079	T1	-0,77952858203415	-4,73789903489235	5,70638455827765	maart	3	6	Weekend	Saturday	89	16,6020786933927	0	Control	Control
33	primary	new	300	Control	3979	1	11	0	6	2018-05-26	3	1	13178	81	observed	23	11,9	0	0,609326812759948	5	0,663993989782798	5	4	2	5	6	1	1,33	5	6	5,5	100	6	Female	-0,494060876020788	T2	10,8204714179658	5,36210096510765	-0,893615441722346	mei	5	6	Weekend	Saturday	59	-13,3979213066073	0	Control	Control
33	primary	new	300	Control	3982	1	10	0	5	2018-03-11	4	1	6013	10	observed	10,2	2,5	1	0,700043674920996	4,3	-0,0360060102172026	7	7	6	6	6	1,67	1,33	6	6	6	57	3,85	Female	-1,49406087602079	T1	-1,97952858203415	-4,03789903489235	0,106384558277654	maart	3	0	Weekend	Sunday	91	18,6020786933927	0	Control	Control
33	primary	new	300	Control	3973	1	10	0	7	2018-06-21	1	1	17309	87	observed	14,4	8,1	0	0,403287378923162	4,9	0,563993989782798	NA	NA	NA	NA	NA	NA	NA	NA	NA	NA	100	6	Female	-1,49406087602079	T3	2,22047141796585	1,56210096510765	-0,893615441722346	juni	6	4	Week	Thursday	68	-4,39792130660727	0	Control	Control
33	primary	new	300	Control	3973	1	10	0	7	2018-06-23	3	1	4180	86	imputed	15,1	4,9	0	0,403287378923162	4,9	0,563993989782798	NA	NA	NA	NA	NA	NA	NA	NA	NA	NA	100	6	Female	-1,49406087602079	T3	2,92047141796585	-1,63789903489235	-0,893615441722346	juni	6	6	Weekend	Saturday	71	-1,39792130660727	0	Control	Control
33	primary	new	300	Control	3975	1	11	0	5	2018-03-09	2	1	12658	61	observed	6,5	5,8	5,1	1,07658821276943	5	0,663993989782798	7	7	7	6	5,33	1	1	6	6	6	100	6	Female	-0,494060876020788	T1	-5,67952858203415	-0,737899034892354	4,20638455827765	maart	3	5	Week	Friday	82	9,60207869339273	0	Control	Control
33	primary	new	300	Control	3975	1	11	0	5	2018-03-12	5	1	13177	68	observed	10,3	2,6	1,8	1,07658821276943	5	0,663993989782798	7	7	7	6	5,33	1	1	6	6	6	100	6	Female	-0,494060876020788	T1	-1,87952858203415	-3,93789903489235	0,906384558277654	maart	3	1	Week	Monday	85	12,6020786933927	0	Control	Control
33	primary	new	300	Control	3975	1	11	0	5	2018-03-10	3	1	12748	61	observed	11,4	1,8	6,6	1,07658821276943	5	0,663993989782798	7	7	7	6	5,33	1	1	6	6	6	100	6	Female	-0,494060876020788	T1	-0,77952858203415	-4,73789903489235	5,70638455827765	maart	3	6	Weekend	Saturday	89	16,6020786933927	0	Control	Control
33	primary	new	300	Control	3975	1	11	0	5	2018-03-08	1	1	13091	56	observed	4,8	2	3,2	1,07658821276943	5	0,663993989782798	7	7	7	6	5,33	1	1	6	6	6	100	6	Female	-0,494060876020788	T1	-7,37952858203415	-4,53789903489235	2,30638455827765	maart	3	4	Week	Thursday	84	11,6020786933927	0	Control	Control
33	primary	new	300	Control	3975	1	11	0	5	2018-03-11	4	1	13236	70	observed	10,2	2,5	1	1,07658821276943	5	0,663993989782798	7	7	7	6	5,33	1	1	6	6	6	100	6	Female	-0,494060876020788	T1	-1,97952858203415	-4,03789903489235	0,106384558277654	maart	3	0	Weekend	Sunday	91	18,6020786933927	0	Control	Control
33	primary	new	300	Control	3980	1	10	0	5	2018-03-10	3	1	22915	188	observed	11,4	1,8	6,6	-0,0274149971739208	5,65	1,3139939897828	4	3	5	5	6	1	1	6	6	6	100	6	Female	-1,49406087602079	T1	-0,77952858203415	-4,73789903489235	5,70638455827765	maart	3	6	Weekend	Saturday	89	16,6020786933927	0	Control	Control
33	primary	new	300	Control	3980	1	10	0	5	2018-03-12	5	1	11604	64	observed	10,3	2,6	1,8	-0,0274149971739208	5,65	1,3139939897828	4	3	5	5	6	1	1	6	6	6	100	6	Female	-1,49406087602079	T1	-1,87952858203415	-3,93789903489235	0,906384558277654	maart	3	1	Week	Monday	85	12,6020786933927	0	Control	Control
33	primary	new	300	Control	3980	1	10	0	5	2018-03-08	1	1	9919	35	observed	4,8	2	3,2	-0,0274149971739208	5,65	1,3139939897828	4	3	5	5	6	1	1	6	6	6	100	6	Female	-1,49406087602079	T1	-7,37952858203415	-4,53789903489235	2,30638455827765	maart	3	4	Week	Thursday	84	11,6020786933927	0	Control	Control
33	primary	new	300	Control	3980	1	10	0	5	2018-03-11	4	1	11643	85	observed	10,2	2,5	1	-0,0274149971739208	5,65	1,3139939897828	4	3	5	5	6	1	1	6	6	6	100	6	Female	-1,49406087602079	T1	-1,97952858203415	-4,03789903489235	0,106384558277654	maart	3	0	Weekend	Sunday	91	18,6020786933927	0	Control	Control
33	primary	new	300	Control	3980	1	10	0	6	2018-05-24	1	1	19050	163	observed	18,3	3,1	0,7	-0,0274149971739208	5,65	1,3139939897828	4	2	3	4,5	6	1	1	6	6	6	100	6	Female	-1,49406087602079	T2	6,12047141796585	-3,43789903489235	-0,193615441722346	mei	5	4	Week	Thursday	69	-3,39792130660727	0	Control	Control
33	primary	new	300	Control	3988	0	10	0	5	2018-03-10	3	1	17833	128	observed	11,4	1,8	6,6	0,200148000849779	5,4	1,0639939897828	7	4	6	5,5	5	1,33	1	6	4	5	100	6	Male	-1,49406087602079	T1	-0,77952858203415	-4,73789903489235	5,70638455827765	maart	3	6	Weekend	Saturday	89	16,6020786933927	0	Control	Control
33	primary	new	300	Control	3980	1	10	0	6	2018-05-28	5	1	9216	43	observed	22,5	11,6	0,3	-0,0274149971739208	5,65	1,3139939897828	4	2	3	4,5	6	1	1	6	6	6	100	6	Female	-1,49406087602079	T2	10,3204714179658	5,06210096510765	-0,593615441722346	mei	5	1	Week	Monday	69	-3,39792130660727	0	Control	Control
33	primary	new	300	Control	3980	1	10	0	6	2018-05-27	4	1	8099	43	observed	20,3	3,1	1,9	-0,0274149971739208	5,65	1,3139939897828	4	2	3	4,5	6	1	1	6	6	6	100	6	Female	-1,49406087602079	T2	8,12047141796585	-3,43789903489235	1,00638455827765	mei	5	0	Weekend	Sunday	71	-1,39792130660727	0	Control	Control
33	primary	new	300	Control	3980	1	10	0	7	2018-06-24	4	1	5697	36	observed	14,7	0,7	0	-0,0274149971739208	5,65	1,3139939897828	7	5	7	4,5	6	1	1	6	6	6	100	6	Female	-1,49406087602079	T3	2,52047141796585	-5,83789903489235	-0,893615441722346	juni	6	0	Weekend	Sunday	78	5,60207869339273	0	Control	Control
33	primary	new	300	Control	3975	1	11	0	7	2018-06-24	4	1	17557	98	observed	14,7	0,7	0	1,07658821276943	5	0,663993989782798	7	7	7	6	6	1	1	6	6	6	93	5,65	Female	-0,494060876020788	T3	2,52047141796585	-5,83789903489235	-0,893615441722346	juni	6	0	Weekend	Sunday	78	5,60207869339273	0	Control	Control
33	primary	new	300	Control	3975	1	11	0	7	2018-06-22	2	1	16132	106	observed	13,3	1,5	0	1,07658821276943	5	0,663993989782798	7	7	7	6	6	1	1	6	6	6	93	5,65	Female	-0,494060876020788	T3	1,12047141796585	-5,03789903489235	-0,893615441722346	juni	6	5	Week	Friday	68	-4,39792130660727	0	Control	Control
33	primary	new	300	Control	3980	1	10	0	7	2018-06-23	3	1	19538	126	observed	15,1	4,9	0	-0,0274149971739208	5,65	1,3139939897828	7	5	7	4,5	6	1	1	6	6	6	100	6	Female	-1,49406087602079	T3	2,92047141796585	-1,63789903489235	-0,893615441722346	juni	6	6	Weekend	Saturday	71	-1,39792130660727	0	Control	Control
33	primary	new	300	Control	3984	1	11	0	5	2018-03-09	2	1	10618	26	observed	6,5	5,8	5,1	1,54716323713196	4,4	0,0639939897827979	4	1	0	6	6	2	1	6	5	5,5	100	6	Female	-0,494060876020788	T1	-5,67952858203415	-0,737899034892354	4,20638455827765	maart	3	5	Week	Friday	82	9,60207869339273	0	Control	Control
33	primary	new	300	Control	3984	1	11	0	5	2018-03-10	3	1	8697	33	observed	11,4	1,8	6,6	1,54716323713196	4,4	0,0639939897827979	4	1	0	6	6	2	1	6	5	5,5	100	6	Female	-0,494060876020788	T1	-0,77952858203415	-4,73789903489235	5,70638455827765	maart	3	6	Weekend	Saturday	89	16,6020786933927	0	Control	Control
33	primary	new	300	Control	3984	1	11	0	5	2018-03-08	1	1	9098	39	observed	4,8	2	3,2	1,54716323713196	4,4	0,0639939897827979	4	1	0	6	6	2	1	6	5	5,5	100	6	Female	-0,494060876020788	T1	-7,37952858203415	-4,53789903489235	2,30638455827765	maart	3	4	Week	Thursday	84	11,6020786933927	0	Control	Control
33	primary	new	300	Control	3984	1	11	0	5	2018-03-12	5	1	11011	52	observed	10,3	2,6	1,8	1,54716323713196	4,4	0,0639939897827979	4	1	0	6	6	2	1	6	5	5,5	100	6	Female	-0,494060876020788	T1	-1,87952858203415	-3,93789903489235	0,906384558277654	maart	3	1	Week	Monday	85	12,6020786933927	0	Control	Control
33	primary	new	300	Control	3984	1	11	0	6	2018-05-25	2	1	10000	23	observed	20,6	10,5	0	1,54716323713196	4,4	0,0639939897827979	4	1	0	5,5	6	1	1	6	6	6	100	6	Female	-0,494060876020788	T2	8,42047141796585	3,96210096510765	-0,893615441722346	mei	5	5	Week	Friday	73	0,602078693392727	0	Control	Control
33	primary	new	300	Control	3984	1	11	0	6	2018-05-26	3	1	16070	86	observed	23	11,9	0	1,54716323713196	4,4	0,0639939897827979	4	1	0	5,5	6	1	1	6	6	6	100	6	Female	-0,494060876020788	T2	10,8204714179658	5,36210096510765	-0,893615441722346	mei	5	6	Weekend	Saturday	59	-13,3979213066073	0	Control	Control
33	primary	new	300	Control	3984	1	11	0	6	2018-05-24	1	1	11087	57	observed	18,3	3,1	0,7	1,54716323713196	4,4	0,0639939897827979	4	1	0	5,5	6	1	1	6	6	6	100	6	Female	-0,494060876020788	T2	6,12047141796585	-3,43789903489235	-0,193615441722346	mei	5	4	Week	Thursday	69	-3,39792130660727	0	Control	Control
33	primary	new	300	Control	3984	1	11	0	6	2018-05-27	4	1	6220	0	observed	20,3	3,1	1,9	1,54716323713196	4,4	0,0639939897827979	4	1	0	5,5	6	1	1	6	6	6	100	6	Female	-0,494060876020788	T2	8,12047141796585	-3,43789903489235	1,00638455827765	mei	5	0	Weekend	Sunday	71	-1,39792130660727	0	Control	Control
33	primary	new	300	Control	3984	1	11	0	6	2018-05-28	5	1	19613	102	observed	22,5	11,6	0,3	1,54716323713196	4,4	0,0639939897827979	4	1	0	5,5	6	1	1	6	6	6	100	6	Female	-0,494060876020788	T2	10,3204714179658	5,06210096510765	-0,593615441722346	mei	5	1	Week	Monday	69	-3,39792130660727	0	Control	Control
33	primary	new	300	Control	3984	1	11	0	7	2018-06-25	5	1	6890	0	observed	16,5	9,6	0	1,54716323713196	4,4	0,0639939897827979	4	1	2	5	6	1	1	5	5	5	86	5,3	Female	-0,494060876020788	T3	4,32047141796585	3,06210096510765	-0,893615441722346	juni	6	1	Week	Monday	75	2,60207869339273	0	Control	Control
33	primary	new	300	Control	3984	1	11	0	7	2018-06-22	2	1	6036	13	observed	13,3	1,5	0	1,54716323713196	4,4	0,0639939897827979	4	1	2	5	6	1	1	5	5	5	86	5,3	Female	-0,494060876020788	T3	1,12047141796585	-5,03789903489235	-0,893615441722346	juni	6	5	Week	Friday	68	-4,39792130660727	0	Control	Control
33	primary	new	300	Control	3981	1	10	0	7	2018-06-23	3	1	13347	24	observed	15,1	4,9	0	-1,3922394447799	3,9	-0,436006010217203	5	5	5	2	2,33	2,67	2,33	3	5	4	100	6	Female	-1,49406087602079	T3	2,92047141796585	-1,63789903489235	-0,893615441722346	juni	6	6	Weekend	Saturday	71	-1,39792130660727	0	Control	Control
33	primary	new	300	Control	3981	1	10	0	7	2018-06-22	2	1	7798	20	observed	13,3	1,5	0	-1,3922394447799	3,9	-0,436006010217203	5	5	5	2	2,33	2,67	2,33	3	5	4	100	6	Female	-1,49406087602079	T3	1,12047141796585	-5,03789903489235	-0,893615441722346	juni	6	5	Week	Friday	68	-4,39792130660727	0	Control	Control
33	primary	new	300	Control	3981	1	10	0	7	2018-06-21	1	1	7848	16	observed	14,4	8,1	0	-1,3922394447799	3,9	-0,436006010217203	5	5	5	2	2,33	2,67	2,33	3	5	4	100	6	Female	-1,49406087602079	T3	2,22047141796585	1,56210096510765	-0,893615441722346	juni	6	4	Week	Thursday	68	-4,39792130660727	0	Control	Control
33	primary	new	300	Control	3982	1	10	0	5	2018-03-09	2	1	12679	9	observed	6,5	5,8	5,1	0,700043674920996	4,3	-0,0360060102172026	7	7	6	6	6	1,67	1,33	6	6	6	57	3,85	Female	-1,49406087602079	T1	-5,67952858203415	-0,737899034892354	4,20638455827765	maart	3	5	Week	Friday	82	9,60207869339273	0	Control	Control
33	primary	new	300	Control	3982	1	10	0	5	2018-03-12	5	1	8281	29	observed	10,3	2,6	1,8	0,700043674920996	4,3	-0,0360060102172026	7	7	6	6	6	1,67	1,33	6	6	6	57	3,85	Female	-1,49406087602079	T1	-1,87952858203415	-3,93789903489235	0,906384558277654	maart	3	1	Week	Monday	85	12,6020786933927	0	Control	Control
33	primary	new	300	Control	3997	0	12	0	6	2018-05-26	3	1	8757	52	observed	23	11,9	0	-0,223008295297794	4,7	0,363993989782797	4	4	3	6	6	4,67	4	5	5	5	100	6	Male	0,505939123979212	T2	10,8204714179658	5,36210096510765	-0,893615441722346	mei	5	6	Weekend	Saturday	59	-13,3979213066073	0	Control	Control
33	primary	new	300	Control	3997	0	12	0	7	2018-06-24	4	1	4437	0	observed	14,7	0,7	0	-0,223008295297794	4,7	0,363993989782797	4	2	2	5	5	2,33	2	6	5	5,5	100	6	Male	0,505939123979212	T3	2,52047141796585	-5,83789903489235	-0,893615441722346	juni	6	0	Weekend	Sunday	78	5,60207869339273	0	Control	Control
33	primary	new	300	Control	3997	0	12	0	7	2018-06-22	2	1	12440	69	observed	13,3	1,5	0	-0,223008295297794	4,7	0,363993989782797	4	2	2	5	5	2,33	2	6	5	5,5	100	6	Male	0,505939123979212	T3	1,12047141796585	-5,03789903489235	-0,893615441722346	juni	6	5	Week	Friday	68	-4,39792130660727	0	Control	Control
33	primary	new	300	Control	3997	0	12	0	7	2018-06-25	5	1	11155	46	observed	16,5	9,6	0	-0,223008295297794	4,7	0,363993989782797	4	2	2	5	5	2,33	2	6	5	5,5	100	6	Male	0,505939123979212	T3	4,32047141796585	3,06210096510765	-0,893615441722346	juni	6	1	Week	Monday	75	2,60207869339273	0	Control	Control
33	primary	new	300	Control	3979	1	11	0	7	2018-06-23	3	1	11581	34	observed	15,1	4,9	0	0,609326812759948	5	0,663993989782798	4	3	3	5,5	6	1	1,67	5	6	5,5	100	6	Female	-0,494060876020788	T3	2,92047141796585	-1,63789903489235	-0,893615441722346	juni	6	6	Weekend	Saturday	71	-1,39792130660727	0	Control	Control
33	primary	new	300	Control	3980	1	10	0	5	2018-03-09	2	1	15132	87	observed	6,5	5,8	5,1	-0,0274149971739208	5,65	1,3139939897828	4	3	5	5	6	1	1	6	6	6	100	6	Female	-1,49406087602079	T1	-5,67952858203415	-0,737899034892354	4,20638455827765	maart	3	5	Week	Friday	82	9,60207869339273	0	Control	Control
33	primary	new	300	Control	3982	1	10	0	7	2018-06-22	2	1	11113	50	observed	13,3	1,5	0	0,700043674920996	4,3	-0,0360060102172026	NA	NA	NA	NA	NA	NA	NA	6	6	6	100	6	Female	-1,49406087602079	T3	1,12047141796585	-5,03789903489235	-0,893615441722346	juni	6	5	Week	Friday	68	-4,39792130660727	0	Control	Control
33	primary	new	300	Control	3982	1	10	0	7	2018-06-23	3	1	18636	17	imputed	15,1	4,9	0	0,700043674920996	4,3	-0,0360060102172026	NA	NA	NA	NA	NA	NA	NA	6	6	6	100	6	Female	-1,49406087602079	T3	2,92047141796585	-1,63789903489235	-0,893615441722346	juni	6	6	Weekend	Saturday	71	-1,39792130660727	0	Control	Control
33	primary	new	300	Control	3995	0	10	0	7	2018-06-22	2	1	10827	44	observed	13,3	1,5	0	0,320890361472485	4,75	0,413993989782798	7	4	1	6	6	4,33	1	4	4	4	100	6	Male	-1,49406087602079	T3	1,12047141796585	-5,03789903489235	-0,893615441722346	juni	6	5	Week	Friday	68	-4,39792130660727	0	Control	Control
33	primary	new	300	Control	3995	0	10	0	7	2018-06-24	4	1	10509	36	observed	14,7	0,7	0	0,320890361472485	4,75	0,413993989782798	7	4	1	6	6	4,33	1	4	4	4	100	6	Male	-1,49406087602079	T3	2,52047141796585	-5,83789903489235	-0,893615441722346	juni	6	0	Weekend	Sunday	78	5,60207869339273	0	Control	Control
33	primary	new	300	Control	3983	0	11	0	5	2018-03-11	4	1	1681	0	observed	10,2	2,5	1	-0,012442505036207	5,8	1,4639939897828	4	4	0	5,5	6	1,67	1	6	6	6	100	6	Male	-0,494060876020788	T1	-1,97952858203415	-4,03789903489235	0,106384558277654	maart	3	0	Weekend	Sunday	91	18,6020786933927	0	Control	Control
33	primary	new	300	Control	3980	1	10	0	6	2018-05-25	2	1	10164	47	observed	20,6	10,5	0	-0,0274149971739208	5,65	1,3139939897828	4	2	3	4,5	6	1	1	6	6	6	100	6	Female	-1,49406087602079	T2	8,42047141796585	3,96210096510765	-0,893615441722346	mei	5	5	Week	Friday	73	0,602078693392727	0	Control	Control
33	primary	new	300	Control	3983	0	11	0	6	2018-05-26	3	1	1000	36	imputed	23	11,9	0	-0,012442505036207	5,8	1,4639939897828	NA	NA	NA	NA	NA	NA	NA	NA	NA	NA	NA	NA	Male	-0,494060876020788	T2	10,8204714179658	5,36210096510765	-0,893615441722346	mei	5	6	Weekend	Saturday	59	-13,3979213066073	0	Control	Control
33	primary	new	300	Control	3983	0	11	0	6	2018-05-25	2	1	6290	0	imputed	20,6	10,5	0	-0,012442505036207	5,8	1,4639939897828	NA	NA	NA	NA	NA	NA	NA	NA	NA	NA	NA	NA	Male	-0,494060876020788	T2	8,42047141796585	3,96210096510765	-0,893615441722346	mei	5	5	Week	Friday	73	0,602078693392727	0	Control	Control
33	primary	new	300	Control	3983	0	11	0	6	2018-05-24	1	1	10390	2	imputed	18,3	3,1	0,7	-0,012442505036207	5,8	1,4639939897828	NA	NA	NA	NA	NA	NA	NA	NA	NA	NA	NA	NA	Male	-0,494060876020788	T2	6,12047141796585	-3,43789903489235	-0,193615441722346	mei	5	4	Week	Thursday	69	-3,39792130660727	0	Control	Control
33	primary	new	300	Control	3983	0	11	0	7	2018-06-21	1	1	9778	17	observed	14,4	8,1	0	-0,012442505036207	5,8	1,4639939897828	NA	NA	NA	NA	NA	NA	NA	NA	NA	NA	100	6	Male	-0,494060876020788	T3	2,22047141796585	1,56210096510765	-0,893615441722346	juni	6	4	Week	Thursday	68	-4,39792130660727	0	Control	Control
33	primary	new	300	Control	3980	1	10	0	7	2018-06-21	1	1	16815	95	observed	14,4	8,1	0	-0,0274149971739208	5,65	1,3139939897828	7	5	7	4,5	6	1	1	6	6	6	100	6	Female	-1,49406087602079	T3	2,22047141796585	1,56210096510765	-0,893615441722346	juni	6	4	Week	Thursday	68	-4,39792130660727	0	Control	Control
33	primary	new	300	Control	3980	1	10	0	7	2018-06-22	2	1	16531	118	observed	13,3	1,5	0	-0,0274149971739208	5,65	1,3139939897828	7	5	7	4,5	6	1	1	6	6	6	100	6	Female	-1,49406087602079	T3	1,12047141796585	-5,03789903489235	-0,893615441722346	juni	6	5	Week	Friday	68	-4,39792130660727	0	Control	Control
33	primary	new	300	Control	3984	1	11	0	5	2018-03-11	4	1	6302	32	observed	10,2	2,5	1	1,54716323713196	4,4	0,0639939897827979	4	1	0	6	6	2	1	6	5	5,5	100	6	Female	-0,494060876020788	T1	-1,97952858203415	-4,03789903489235	0,106384558277654	maart	3	0	Weekend	Sunday	91	18,6020786933927	0	Control	Control
33	primary	new	300	Control	3996	0	11	0	6	2018-05-26	3	1	19728	166	observed	23	11,9	0	-0,698150781765486	3,8	-0,536006010217203	7	6	6	4	4	4	4	4	4	4	96	5,8	Male	-0,494060876020788	T2	10,8204714179658	5,36210096510765	-0,893615441722346	mei	5	6	Weekend	Saturday	59	-13,3979213066073	0	Control	Control
33	primary	new	300	Control	3996	0	11	0	6	2018-05-28	5	1	10790	50	observed	22,5	11,6	0,3	-0,698150781765486	3,8	-0,536006010217203	7	6	6	4	4	4	4	4	4	4	96	5,8	Male	-0,494060876020788	T2	10,3204714179658	5,06210096510765	-0,593615441722346	mei	5	1	Week	Monday	69	-3,39792130660727	0	Control	Control
33	primary	new	300	Control	3996	0	11	0	6	2018-05-25	2	1	15901	113	observed	20,6	10,5	0	-0,698150781765486	3,8	-0,536006010217203	7	6	6	4	4	4	4	4	4	4	96	5,8	Male	-0,494060876020788	T2	8,42047141796585	3,96210096510765	-0,893615441722346	mei	5	5	Week	Friday	73	0,602078693392727	0	Control	Control
33	primary	new	300	Control	3996	0	11	0	6	2018-05-27	4	1	4121	51	observed	20,3	3,1	1,9	-0,698150781765486	3,8	-0,536006010217203	7	6	6	4	4	4	4	4	4	4	96	5,8	Male	-0,494060876020788	T2	8,12047141796585	-3,43789903489235	1,00638455827765	mei	5	0	Weekend	Sunday	71	-1,39792130660727	0	Control	Control
33	primary	new	300	Control	3993	0	11	0	7	2018-06-24	4	1	8237	67	observed	14,7	0,7	0	0,669677866073038	3,9	-0,436006010217202	1	1	1	6	6	6	3	4	3	3,5	100	6	Male	-0,494060876020788	T3	2,52047141796585	-5,83789903489235	-0,893615441722346	juni	6	0	Weekend	Sunday	78	5,60207869339273	0	Control	Control
33	primary	new	300	Control	3994	1	10	0	5	2018-03-10	3	1	8773	0	imputed	11,4	1,8	6,6	0,498160553508635	4,85	0,513993989782797	0	1	0	5,5	4,33	3,67	3,33	4	5	4,5	0	1	Female	-1,49406087602079	T1	-0,77952858203415	-4,73789903489235	5,70638455827765	maart	3	6	Weekend	Saturday	89	16,6020786933927	0	Control	Control
33	primary	new	300	Control	3994	1	10	0	5	2018-03-12	5	1	4027	12	observed	10,3	2,6	1,8	0,498160553508635	4,85	0,513993989782797	0	1	0	5,5	4,33	3,67	3,33	4	5	4,5	0	1	Female	-1,49406087602079	T1	-1,87952858203415	-3,93789903489235	0,906384558277654	maart	3	1	Week	Monday	85	12,6020786933927	0	Control	Control
33	primary	new	300	Control	3994	1	10	0	5	2018-03-08	1	1	5559	9	observed	4,8	2	3,2	0,498160553508635	4,85	0,513993989782797	0	1	0	5,5	4,33	3,67	3,33	4	5	4,5	0	1	Female	-1,49406087602079	T1	-7,37952858203415	-4,53789903489235	2,30638455827765	maart	3	4	Week	Thursday	84	11,6020786933927	0	Control	Control
33	primary	new	300	Control	3994	1	10	0	5	2018-03-09	2	1	5564	18	observed	6,5	5,8	5,1	0,498160553508635	4,85	0,513993989782797	0	1	0	5,5	4,33	3,67	3,33	4	5	4,5	0	1	Female	-1,49406087602079	T1	-5,67952858203415	-0,737899034892354	4,20638455827765	maart	3	5	Week	Friday	82	9,60207869339273	0	Control	Control
33	primary	new	300	Control	3994	1	10	0	6	2018-05-27	4	1	8366	25	observed	20,3	3,1	1,9	0,498160553508635	4,85	0,513993989782797	2	3	3	6	4,33	1	1	6	6	6	74	4,7	Female	-1,49406087602079	T2	8,12047141796585	-3,43789903489235	1,00638455827765	mei	5	0	Weekend	Sunday	71	-1,39792130660727	0	Control	Control
33	primary	new	300	Control	3994	1	10	0	6	2018-05-24	1	1	8450	9	observed	18,3	3,1	0,7	0,498160553508635	4,85	0,513993989782797	2	3	3	6	4,33	1	1	6	6	6	74	4,7	Female	-1,49406087602079	T2	6,12047141796585	-3,43789903489235	-0,193615441722346	mei	5	4	Week	Thursday	69	-3,39792130660727	0	Control	Control
33	primary	new	300	Control	3994	1	10	0	6	2018-05-26	3	1	8740	0	observed	23	11,9	0	0,498160553508635	4,85	0,513993989782797	2	3	3	6	4,33	1	1	6	6	6	74	4,7	Female	-1,49406087602079	T2	10,8204714179658	5,36210096510765	-0,893615441722346	mei	5	6	Weekend	Saturday	59	-13,3979213066073	0	Control	Control
33	primary	new	300	Control	3997	0	12	0	5	2018-03-12	5	1	11104	89	observed	10,3	2,6	1,8	-0,223008295297794	4,7	0,363993989782797	5	4	4	5	5	2,33	1,67	5	6	5,5	100	6	Male	0,505939123979212	T1	-1,87952858203415	-3,93789903489235	0,906384558277654	maart	3	1	Week	Monday	85	12,6020786933927	0	Control	Control
33	primary	new	300	Control	3997	0	12	0	5	2018-03-09	2	1	12163	79	observed	6,5	5,8	5,1	-0,223008295297794	4,7	0,363993989782797	5	4	4	5	5	2,33	1,67	5	6	5,5	100	6	Male	0,505939123979212	T1	-5,67952858203415	-0,737899034892354	4,20638455827765	maart	3	5	Week	Friday	82	9,60207869339273	0	Control	Control
33	primary	new	300	Control	3997	0	12	0	6	2018-05-24	1	1	11909	67	observed	18,3	3,1	0,7	-0,223008295297794	4,7	0,363993989782797	4	4	3	6	6	4,67	4	5	5	5	100	6	Male	0,505939123979212	T2	6,12047141796585	-3,43789903489235	-0,193615441722346	mei	5	4	Week	Thursday	69	-3,39792130660727	0	Control	Control
33	primary	new	300	Control	3997	0	12	0	6	2018-05-27	4	1	5533	0	observed	20,3	3,1	1,9	-0,223008295297794	4,7	0,363993989782797	4	4	3	6	6	4,67	4	5	5	5	100	6	Male	0,505939123979212	T2	8,12047141796585	-3,43789903489235	1,00638455827765	mei	5	0	Weekend	Sunday	71	-1,39792130660727	0	Control	Control
33	primary	new	300	Control	3997	0	12	0	6	2018-05-28	5	1	9269	72	observed	22,5	11,6	0,3	-0,223008295297794	4,7	0,363993989782797	4	4	3	6	6	4,67	4	5	5	5	100	6	Male	0,505939123979212	T2	10,3204714179658	5,06210096510765	-0,593615441722346	mei	5	1	Week	Monday	69	-3,39792130660727	0	Control	Control
33	primary	new	300	Control	3997	0	12	0	6	2018-05-25	2	1	10382	30	observed	20,6	10,5	0	-0,223008295297794	4,7	0,363993989782797	4	4	3	6	6	4,67	4	5	5	5	100	6	Male	0,505939123979212	T2	8,42047141796585	3,96210096510765	-0,893615441722346	mei	5	5	Week	Friday	73	0,602078693392727	0	Control	Control
33	primary	new	300	Control	3995	0	10	0	5	2018-03-11	4	1	6137	8	observed	10,2	2,5	1	0,320890361472485	4,75	0,413993989782798	7	4	0	6	6	4	2,67	1	6	3,5	100	6	Male	-1,49406087602079	T1	-1,97952858203415	-4,03789903489235	0,106384558277654	maart	3	0	Weekend	Sunday	91	18,6020786933927	0	Control	Control
33	primary	new	300	Control	3995	0	10	0	5	2018-03-08	1	1	12296	84	observed	4,8	2	3,2	0,320890361472485	4,75	0,413993989782798	7	4	0	6	6	4	2,67	1	6	3,5	100	6	Male	-1,49406087602079	T1	-7,37952858203415	-4,53789903489235	2,30638455827765	maart	3	4	Week	Thursday	84	11,6020786933927	0	Control	Control
33	primary	new	300	Control	3982	1	10	0	5	2018-03-10	3	1	9474	51	observed	11,4	1,8	6,6	0,700043674920996	4,3	-0,0360060102172026	7	7	6	6	6	1,67	1,33	6	6	6	57	3,85	Female	-1,49406087602079	T1	-0,77952858203415	-4,73789903489235	5,70638455827765	maart	3	6	Weekend	Saturday	89	16,6020786933927	0	Control	Control
33	primary	new	300	Control	3982	1	10	0	5	2018-03-08	1	1	9617	33	observed	4,8	2	3,2	0,700043674920996	4,3	-0,0360060102172026	7	7	6	6	6	1,67	1,33	6	6	6	57	3,85	Female	-1,49406087602079	T1	-7,37952858203415	-4,53789903489235	2,30638455827765	maart	3	4	Week	Thursday	84	11,6020786933927	0	Control	Control
33	primary	new	300	Control	3982	1	10	0	6	2018-05-28	5	1	19358	112	observed	22,5	11,6	0,3	0,700043674920996	4,3	-0,0360060102172026	7	5	7	6	6	3,67	3,33	6	6	6	82	5,1	Female	-1,49406087602079	T2	10,3204714179658	5,06210096510765	-0,593615441722346	mei	5	1	Week	Monday	69	-3,39792130660727	0	Control	Control
33	primary	new	300	Control	3982	1	10	0	6	2018-05-26	3	1	13013	97	imputed	23	11,9	0	0,700043674920996	4,3	-0,0360060102172026	7	5	7	6	6	3,67	3,33	6	6	6	82	5,1	Female	-1,49406087602079	T2	10,8204714179658	5,36210096510765	-0,893615441722346	mei	5	6	Weekend	Saturday	59	-13,3979213066073	0	Control	Control
33	primary	new	300	Control	3997	0	12	0	7	2018-06-21	1	1	15253	94	observed	14,4	8,1	0	-0,223008295297794	4,7	0,363993989782797	4	2	2	5	5	2,33	2	6	5	5,5	100	6	Male	0,505939123979212	T3	2,22047141796585	1,56210096510765	-0,893615441722346	juni	6	4	Week	Thursday	68	-4,39792130660727	0	Control	Control
33	primary	new	300	Control	3997	0	12	0	7	2018-06-23	3	1	3509	7	observed	15,1	4,9	0	-0,223008295297794	4,7	0,363993989782797	4	2	2	5	5	2,33	2	6	5	5,5	100	6	Male	0,505939123979212	T3	2,92047141796585	-1,63789903489235	-0,893615441722346	juni	6	6	Weekend	Saturday	71	-1,39792130660727	0	Control	Control
33	primary	new	300	Control	3982	1	10	0	6	2018-05-27	4	1	10411	41	observed	20,3	3,1	1,9	0,700043674920996	4,3	-0,0360060102172026	7	5	7	6	6	3,67	3,33	6	6	6	82	5,1	Female	-1,49406087602079	T2	8,12047141796585	-3,43789903489235	1,00638455827765	mei	5	0	Weekend	Sunday	71	-1,39792130660727	0	Control	Control
33	primary	new	300	Control	3995	0	10	0	7	2018-06-25	5	1	11977	64	observed	16,5	9,6	0	0,320890361472485	4,75	0,413993989782798	7	4	1	6	6	4,33	1	4	4	4	100	6	Male	-1,49406087602079	T3	4,32047141796585	3,06210096510765	-0,893615441722346	juni	6	1	Week	Monday	75	2,60207869339273	0	Control	Control
33	primary	new	300	Control	3995	0	10	0	7	2018-06-21	1	1	11874	56	observed	14,4	8,1	0	0,320890361472485	4,75	0,413993989782798	7	4	1	6	6	4,33	1	4	4	4	100	6	Male	-1,49406087602079	T3	2,22047141796585	1,56210096510765	-0,893615441722346	juni	6	4	Week	Thursday	68	-4,39792130660727	0	Control	Control
33	primary	new	300	Control	3975	1	11	0	6	2018-05-28	5	1	17255	55	observed	22,5	11,6	0,3	1,07658821276943	5	0,663993989782798	7	7	7	6	6	1	1	6	6	6	91	5,55	Female	-0,494060876020788	T2	10,3204714179658	5,06210096510765	-0,593615441722346	mei	5	1	Week	Monday	69	-3,39792130660727	0	Control	Control
33	primary	new	300	Control	3975	1	11	0	6	2018-05-24	1	1	14164	74	observed	18,3	3,1	0,7	1,07658821276943	5	0,663993989782798	7	7	7	6	6	1	1	6	6	6	91	5,55	Female	-0,494060876020788	T2	6,12047141796585	-3,43789903489235	-0,193615441722346	mei	5	4	Week	Thursday	69	-3,39792130660727	0	Control	Control
33	primary	new	300	Control	3975	1	11	0	6	2018-05-26	3	1	7962	5	observed	23	11,9	0	1,07658821276943	5	0,663993989782798	7	7	7	6	6	1	1	6	6	6	91	5,55	Female	-0,494060876020788	T2	10,8204714179658	5,36210096510765	-0,893615441722346	mei	5	6	Weekend	Saturday	59	-13,3979213066073	0	Control	Control
33	primary	new	300	Control	3975	1	11	0	6	2018-05-25	2	1	16912	92	observed	20,6	10,5	0	1,07658821276943	5	0,663993989782798	7	7	7	6	6	1	1	6	6	6	91	5,55	Female	-0,494060876020788	T2	8,42047141796585	3,96210096510765	-0,893615441722346	mei	5	5	Week	Friday	73	0,602078693392727	0	Control	Control
33	primary	new	300	Control	3975	1	11	0	6	2018-05-27	4	1	4828	0	observed	20,3	3,1	1,9	1,07658821276943	5	0,663993989782798	7	7	7	6	6	1	1	6	6	6	91	5,55	Female	-0,494060876020788	T2	8,12047141796585	-3,43789903489235	1,00638455827765	mei	5	0	Weekend	Sunday	71	-1,39792130660727	0	Control	Control
33	primary	new	300	Control	3996	0	11	0	5	2018-03-12	5	1	8648	76	observed	10,3	2,6	1,8	-0,698150781765486	3,8	-0,536006010217203	5	5	4	6	5,33	2	3,67	6	6	6	100	6	Male	-0,494060876020788	T1	-1,87952858203415	-3,93789903489235	0,906384558277654	maart	3	1	Week	Monday	85	12,6020786933927	0	Control	Control
33	primary	new	300	Control	3996	0	11	0	5	2018-03-11	4	1	21920	152	observed	10,2	2,5	1	-0,698150781765486	3,8	-0,536006010217203	5	5	4	6	5,33	2	3,67	6	6	6	100	6	Male	-0,494060876020788	T1	-1,97952858203415	-4,03789903489235	0,106384558277654	maart	3	0	Weekend	Sunday	91	18,6020786933927	0	Control	Control
33	primary	new	300	Control	3996	0	11	0	5	2018-03-08	1	1	17833	120	observed	4,8	2	3,2	-0,698150781765486	3,8	-0,536006010217203	5	5	4	6	5,33	2	3,67	6	6	6	100	6	Male	-0,494060876020788	T1	-7,37952858203415	-4,53789903489235	2,30638455827765	maart	3	4	Week	Thursday	84	11,6020786933927	0	Control	Control
33	primary	new	300	Control	3983	0	11	0	7	2018-06-22	2	1	4088	22	observed	13,3	1,5	0	-0,012442505036207	5,8	1,4639939897828	NA	NA	NA	NA	NA	NA	NA	NA	NA	NA	100	6	Male	-0,494060876020788	T3	1,12047141796585	-5,03789903489235	-0,893615441722346	juni	6	5	Week	Friday	68	-4,39792130660727	0	Control	Control
33	primary	new	300	Control	3983	0	11	0	7	2018-06-23	3	1	3811	28	imputed	15,1	4,9	0	-0,012442505036207	5,8	1,4639939897828	NA	NA	NA	NA	NA	NA	NA	NA	NA	NA	100	6	Male	-0,494060876020788	T3	2,92047141796585	-1,63789903489235	-0,893615441722346	juni	6	6	Weekend	Saturday	71	-1,39792130660727	0	Control	Control
33	primary	new	300	Control	3996	0	11	0	5	2018-03-10	3	1	2476	0	observed	11,4	1,8	6,6	-0,698150781765486	3,8	-0,536006010217203	5	5	4	6	5,33	2	3,67	6	6	6	100	6	Male	-0,494060876020788	T1	-0,77952858203415	-4,73789903489235	5,70638455827765	maart	3	6	Weekend	Saturday	89	16,6020786933927	0	Control	Control
33	primary	new	300	Control	3996	0	11	0	6	2018-05-24	1	1	21458	200	observed	18,3	3,1	0,7	-0,698150781765486	3,8	-0,536006010217203	7	6	6	4	4	4	4	4	4	4	96	5,8	Male	-0,494060876020788	T2	6,12047141796585	-3,43789903489235	-0,193615441722346	mei	5	4	Week	Thursday	69	-3,39792130660727	0	Control	Control
33	primary	new	300	Control	3994	1	11	0	7	2018-06-23	3	1	5586	35	imputed	15,1	4,9	0	0,498160553508635	4,85	0,513993989782797	2	3	7	6	6	1	1	6	6	6	100	6	Female	-0,494060876020788	T3	2,92047141796585	-1,63789903489235	-0,893615441722346	juni	6	6	Weekend	Saturday	71	-1,39792130660727	0	Control	Control
33	primary	new	300	Control	3994	1	11	0	7	2018-06-22	2	1	6998	71	imputed	13,3	1,5	0	0,498160553508635	4,85	0,513993989782797	2	3	7	6	6	1	1	6	6	6	100	6	Female	-0,494060876020788	T3	1,12047141796585	-5,03789903489235	-0,893615441722346	juni	6	5	Week	Friday	68	-4,39792130660727	0	Control	Control
33	primary	new	300	Control	3996	0	11	0	7	2018-06-22	2	1	15019	27	imputed	13,3	1,5	0	-0,698150781765486	3,8	-0,536006010217203	7	7	7	6	6	6	6	4	6	5	53	3,65	Male	-0,494060876020788	T3	1,12047141796585	-5,03789903489235	-0,893615441722346	juni	6	5	Week	Friday	68	-4,39792130660727	0	Control	Control
33	primary	new	300	Control	3996	0	11	0	7	2018-06-25	5	1	10973	27	observed	16,5	9,6	0	-0,698150781765486	3,8	-0,536006010217203	7	7	7	6	6	6	6	4	6	5	53	3,65	Male	-0,494060876020788	T3	4,32047141796585	3,06210096510765	-0,893615441722346	juni	6	1	Week	Monday	75	2,60207869339273	0	Control	Control
33	primary	new	300	Control	3996	0	11	0	7	2018-06-21	1	1	10333	40	observed	14,4	8,1	0	-0,698150781765486	3,8	-0,536006010217203	7	7	7	6	6	6	6	4	6	5	53	3,65	Male	-0,494060876020788	T3	2,22047141796585	1,56210096510765	-0,893615441722346	juni	6	4	Week	Thursday	68	-4,39792130660727	0	Control	Control
33	primary	new	300	Control	3996	0	11	0	7	2018-06-23	3	1	1000	99	imputed	15,1	4,9	0	-0,698150781765486	3,8	-0,536006010217203	7	7	7	6	6	6	6	4	6	5	53	3,65	Male	-0,494060876020788	T3	2,92047141796585	-1,63789903489235	-0,893615441722346	juni	6	6	Weekend	Saturday	71	-1,39792130660727	0	Control	Control
33	primary	new	300	Control	3997	0	12	0	5	2018-03-10	3	1	6724	31	observed	11,4	1,8	6,6	-0,223008295297794	4,7	0,363993989782797	5	4	4	5	5	2,33	1,67	5	6	5,5	100	6	Male	0,505939123979212	T1	-0,77952858203415	-4,73789903489235	5,70638455827765	maart	3	6	Weekend	Saturday	89	16,6020786933927	0	Control	Control
33	primary	new	300	Control	3997	0	12	0	5	2018-03-11	4	1	15655	149	observed	10,2	2,5	1	-0,223008295297794	4,7	0,363993989782797	5	4	4	5	5	2,33	1,67	5	6	5,5	100	6	Male	0,505939123979212	T1	-1,97952858203415	-4,03789903489235	0,106384558277654	maart	3	0	Weekend	Sunday	91	18,6020786933927	0	Control	Control
33	primary	new	300	Control	3994	1	10	0	6	2018-05-25	2	1	7630	20	observed	20,6	10,5	0	0,498160553508635	4,85	0,513993989782797	2	3	3	6	4,33	1	1	6	6	6	74	4,7	Female	-1,49406087602079	T2	8,42047141796585	3,96210096510765	-0,893615441722346	mei	5	5	Week	Friday	73	0,602078693392727	0	Control	Control
33	primary	new	300	Control	3994	1	10	0	6	2018-05-28	5	1	8834	0	observed	22,5	11,6	0,3	0,498160553508635	4,85	0,513993989782797	2	3	3	6	4,33	1	1	6	6	6	74	4,7	Female	-1,49406087602079	T2	10,3204714179658	5,06210096510765	-0,593615441722346	mei	5	1	Week	Monday	69	-3,39792130660727	0	Control	Control
33	primary	new	300	Control	3994	1	11	0	7	2018-06-21	1	1	6184	5	imputed	14,4	8,1	0	0,498160553508635	4,85	0,513993989782797	2	3	7	6	6	1	1	6	6	6	100	6	Female	-0,494060876020788	T3	2,22047141796585	1,56210096510765	-0,893615441722346	juni	6	4	Week	Thursday	68	-4,39792130660727	0	Control	Control
33	primary	new	300	Control	3995	0	10	0	6	2018-05-27	4	1	2286	0	observed	20,3	3,1	1,9	0,320890361472485	4,75	0,413993989782798	2	2	0	6	6	4	1	3	4	3,5	100	6	Male	-1,49406087602079	T2	8,12047141796585	-3,43789903489235	1,00638455827765	mei	5	0	Weekend	Sunday	71	-1,39792130660727	0	Control	Control
33	primary	new	300	Control	3995	0	10	0	7	2018-06-23	3	1	6436	17	observed	15,1	4,9	0	0,320890361472485	4,75	0,413993989782798	7	4	1	6	6	4,33	1	4	4	4	100	6	Male	-1,49406087602079	T3	2,92047141796585	-1,63789903489235	-0,893615441722346	juni	6	6	Weekend	Saturday	71	-1,39792130660727	0	Control	Control
33	primary	new	300	Control	3995	0	10	0	5	2018-03-12	5	1	13807	85	observed	10,3	2,6	1,8	0,320890361472485	4,75	0,413993989782798	7	4	0	6	6	4	2,67	1	6	3,5	100	6	Male	-1,49406087602079	T1	-1,87952858203415	-3,93789903489235	0,906384558277654	maart	3	1	Week	Monday	85	12,6020786933927	0	Control	Control
33	primary	new	300	Control	3995	0	10	0	5	2018-03-10	3	1	6360	10	observed	11,4	1,8	6,6	0,320890361472485	4,75	0,413993989782798	7	4	0	6	6	4	2,67	1	6	3,5	100	6	Male	-1,49406087602079	T1	-0,77952858203415	-4,73789903489235	5,70638455827765	maart	3	6	Weekend	Saturday	89	16,6020786933927	0	Control	Control
33	primary	new	300	Control	3983	0	11	0	5	2018-03-08	1	1	8606	32	observed	4,8	2	3,2	-0,012442505036207	5,8	1,4639939897828	4	4	0	5,5	6	1,67	1	6	6	6	100	6	Male	-0,494060876020788	T1	-7,37952858203415	-4,53789903489235	2,30638455827765	maart	3	4	Week	Thursday	84	11,6020786933927	0	Control	Control
33	primary	new	300	Control	3982	1	10	0	6	2018-05-25	2	1	8022	32	observed	20,6	10,5	0	0,700043674920996	4,3	-0,0360060102172026	7	5	7	6	6	3,67	3,33	6	6	6	82	5,1	Female	-1,49406087602079	T2	8,42047141796585	3,96210096510765	-0,893615441722346	mei	5	5	Week	Friday	73	0,602078693392727	0	Control	Control
33	primary	new	300	Control	3995	0	10	0	6	2018-05-26	3	1	9842	14	observed	23	11,9	0	0,320890361472485	4,75	0,413993989782798	2	2	0	6	6	4	1	3	4	3,5	100	6	Male	-1,49406087602079	T2	10,8204714179658	5,36210096510765	-0,893615441722346	mei	5	6	Weekend	Saturday	59	-13,3979213066073	0	Control	Control
33	primary	new	300	Control	3995	0	10	0	5	2018-03-09	2	1	10921	83	observed	6,5	5,8	5,1	0,320890361472485	4,75	0,413993989782798	7	4	0	6	6	4	2,67	1	6	3,5	100	6	Male	-1,49406087602079	T1	-5,67952858203415	-0,737899034892354	4,20638455827765	maart	3	5	Week	Friday	82	9,60207869339273	0	Control	Control
33	primary	new	300	Control	3972	0	10	0	5	2018-03-08	1	1	11598	63	observed	4,8	2	3,2	-0,402523852402388	4,54327094812325	0,207264937906045	NA	NA	NA	5,5	6	3,67	1	6	6	6	91	5,55	Male	-1,49406087602079	T1	-7,37952858203415	-4,53789903489235	2,30638455827765	maart	3	4	Week	Thursday	84	11,6020786933927	0	Control	Control
33	primary	new	300	Control	3982	1	10	0	6	2018-05-24	1	1	11423	26	observed	18,3	3,1	0,7	0,700043674920996	4,3	-0,0360060102172026	7	5	7	6	6	3,67	3,33	6	6	6	82	5,1	Female	-1,49406087602079	T2	6,12047141796585	-3,43789903489235	-0,193615441722346	mei	5	4	Week	Thursday	69	-3,39792130660727	0	Control	Control
33	primary	new	300	Control	3972	0	10	0	5	2018-03-12	5	1	7833	45	observed	10,3	2,6	1,8	-0,402523852402388	4,54327094812325	0,207264937906045	NA	NA	NA	5,5	6	3,67	1	6	6	6	91	5,55	Male	-1,49406087602079	T1	-1,87952858203415	-3,93789903489235	0,906384558277654	maart	3	1	Week	Monday	85	12,6020786933927	0	Control	Control
33	primary	new	300	Control	3995	0	10	0	6	2018-05-24	1	1	13531	94	observed	18,3	3,1	0,7	0,320890361472485	4,75	0,413993989782798	2	2	0	6	6	4	1	3	4	3,5	100	6	Male	-1,49406087602079	T2	6,12047141796585	-3,43789903489235	-0,193615441722346	mei	5	4	Week	Thursday	69	-3,39792130660727	0	Control	Control
33	primary	new	300	Control	3997	0	12	0	5	2018-03-08	1	1	13352	87	observed	4,8	2	3,2	-0,223008295297794	4,7	0,363993989782797	5	4	4	5	5	2,33	1,67	5	6	5,5	100	6	Male	0,505939123979212	T1	-7,37952858203415	-4,53789903489235	2,30638455827765	maart	3	4	Week	Thursday	84	11,6020786933927	0	Control	Control
33	primary	new	300	Control	3972	0	10	0	5	2018-03-10	3	1	5035	83	imputed	11,4	1,8	6,6	-0,402523852402388	4,54327094812325	0,207264937906045	NA	NA	NA	5,5	6	3,67	1	6	6	6	91	5,55	Male	-1,49406087602079	T1	-0,77952858203415	-4,73789903489235	5,70638455827765	maart	3	6	Weekend	Saturday	89	16,6020786933927	0	Control	Control
33	primary	new	300	Control	3972	0	10	0	5	2018-03-09	2	1	14758	143	observed	6,5	5,8	5,1	-0,402523852402388	4,54327094812325	0,207264937906045	NA	NA	NA	5,5	6	3,67	1	6	6	6	91	5,55	Male	-1,49406087602079	T1	-5,67952858203415	-0,737899034892354	4,20638455827765	maart	3	5	Week	Friday	82	9,60207869339273	0	Control	Control
33	primary	new	300	Control	3995	0	10	0	6	2018-05-25	2	1	9807	68	observed	20,6	10,5	0	0,320890361472485	4,75	0,413993989782798	2	2	0	6	6	4	1	3	4	3,5	100	6	Male	-1,49406087602079	T2	8,42047141796585	3,96210096510765	-0,893615441722346	mei	5	5	Week	Friday	73	0,602078693392727	0	Control	Control
33	primary	new	300	Control	3996	0	11	0	5	2018-03-09	2	1	10798	75	observed	6,5	5,8	5,1	-0,698150781765486	3,8	-0,536006010217203	5	5	4	6	5,33	2	3,67	6	6	6	100	6	Male	-0,494060876020788	T1	-5,67952858203415	-0,737899034892354	4,20638455827765	maart	3	5	Week	Friday	82	9,60207869339273	0	Control	Control
33	primary	new	300	Control	3995	0	10	0	6	2018-05-28	5	1	29552	241	observed	22,5	11,6	0,3	0,320890361472485	4,75	0,413993989782798	2	2	0	6	6	4	1	3	4	3,5	100	6	Male	-1,49406087602079	T2	10,3204714179658	5,06210096510765	-0,593615441722346	mei	5	1	Week	Monday	69	-3,39792130660727	1	Control	Control
33	primary	new	301	Control	3976	1	9	0	5	2018-03-08	1	1	1254	0	observed	4,8	2	3,2	2,15831827483625	4,4	0,0639939897827979	1	0	1	6	6	4,67	2,33	3	5	4	100	6	Female	-2,49406087602079	T1	-7,37952858203415	-4,53789903489235	2,30638455827765	maart	3	4	Week	Thursday	84	11,6020786933927	0	Control	Control
33	primary	new	301	Control	3976	1	10	0	6	2018-05-26	3	1	6316	23	observed	23	11,9	0	2,15831827483625	4,4	0,0639939897827979	NA	NA	NA	4,5	3	1	1	4	5	4,5	52	3,6	Female	-1,49406087602079	T2	10,8204714179658	5,36210096510765	-0,893615441722346	mei	5	6	Weekend	Saturday	59	-13,3979213066073	0	Control	Control
33	primary	new	301	Control	3976	1	10	0	7	2018-06-22	2	1	16088	39	observed	13,3	1,5	0	2,15831827483625	4,4	0,0639939897827979	5	6	6	6	6	6	6	5	6	5,5	100	6	Female	-1,49406087602079	T3	1,12047141796585	-5,03789903489235	-0,893615441722346	juni	6	5	Week	Friday	68	-4,39792130660727	0	Control	Control
33	primary	new	301	Control	3976	1	10	0	7	2018-06-24	4	1	6807	0	observed	14,7	0,7	0	2,15831827483625	4,4	0,0639939897827979	5	6	6	6	6	6	6	5	6	5,5	100	6	Female	-1,49406087602079	T3	2,52047141796585	-5,83789903489235	-0,893615441722346	juni	6	0	Weekend	Sunday	78	5,60207869339273	0	Control	Control
33	primary	new	301	Control	3999	0	9	0	7	2018-06-25	5	1	10900	49	observed	16,5	9,6	0	1,5382621522363	5,1	0,763993989782797	6	2	2	6	6	4,33	5	6	6	6	99	5,95	Male	-2,49406087602079	T3	4,32047141796585	3,06210096510765	-0,893615441722346	juni	6	1	Week	Monday	75	2,60207869339273	0	Control	Control
33	primary	new	301	Control	4001	0	10	0	5	2018-03-11	4	1	5239	26	observed	10,2	2,5	1	-0,106050778421126	4,9	0,563993989782798	6	5	5	6	6	4,67	2,33	5	5	5	75	4,75	Male	-1,49406087602079	T1	-1,97952858203415	-4,03789903489235	0,106384558277654	maart	3	0	Weekend	Sunday	91	18,6020786933927	0	Control	Control
33	primary	new	301	Control	3976	1	10	0	6	2018-05-25	2	1	14491	78	observed	20,6	10,5	0	2,15831827483625	4,4	0,0639939897827979	NA	NA	NA	4,5	3	1	1	4	5	4,5	52	3,6	Female	-1,49406087602079	T2	8,42047141796585	3,96210096510765	-0,893615441722346	mei	5	5	Week	Friday	73	0,602078693392727	0	Control	Control
33	primary	new	301	Control	4001	0	10	0	5	2018-03-08	1	1	16362	114	observed	4,8	2	3,2	-0,106050778421126	4,9	0,563993989782798	6	5	5	6	6	4,67	2,33	5	5	5	75	4,75	Male	-1,49406087602079	T1	-7,37952858203415	-4,53789903489235	2,30638455827765	maart	3	4	Week	Thursday	84	11,6020786933927	0	Control	Control
33	primary	new	301	Control	4001	0	10	0	5	2018-03-12	5	1	11435	76	observed	10,3	2,6	1,8	-0,106050778421126	4,9	0,563993989782798	6	5	5	6	6	4,67	2,33	5	5	5	75	4,75	Male	-1,49406087602079	T1	-1,87952858203415	-3,93789903489235	0,906384558277654	maart	3	1	Week	Monday	85	12,6020786933927	0	Control	Control
33	primary	new	301	Control	3976	1	10	0	7	2018-06-23	3	1	15398	74	observed	15,1	4,9	0	2,15831827483625	4,4	0,0639939897827979	5	6	6	6	6	6	6	5	6	5,5	100	6	Female	-1,49406087602079	T3	2,92047141796585	-1,63789903489235	-0,893615441722346	juni	6	6	Weekend	Saturday	71	-1,39792130660727	0	Control	Control
33	primary	new	301	Control	3976	1	9	0	5	2018-03-09	2	1	1212	0	observed	6,5	5,8	5,1	2,15831827483625	4,4	0,0639939897827979	1	0	1	6	6	4,67	2,33	3	5	4	100	6	Female	-2,49406087602079	T1	-5,67952858203415	-0,737899034892354	4,20638455827765	maart	3	5	Week	Friday	82	9,60207869339273	0	Control	Control
33	primary	new	301	Control	3976	1	9	0	5	2018-03-12	5	1	1028	0	observed	10,3	2,6	1,8	2,15831827483625	4,4	0,0639939897827979	1	0	1	6	6	4,67	2,33	3	5	4	100	6	Female	-2,49406087602079	T1	-1,87952858203415	-3,93789903489235	0,906384558277654	maart	3	1	Week	Monday	85	12,6020786933927	0	Control	Control
33	primary	new	301	Control	3976	1	9	0	5	2018-03-10	3	1	1616	0	observed	11,4	1,8	6,6	2,15831827483625	4,4	0,0639939897827979	1	0	1	6	6	4,67	2,33	3	5	4	100	6	Female	-2,49406087602079	T1	-0,77952858203415	-4,73789903489235	5,70638455827765	maart	3	6	Weekend	Saturday	89	16,6020786933927	0	Control	Control
33	primary	new	301	Control	3976	1	10	0	6	2018-05-24	1	1	14529	57	observed	18,3	3,1	0,7	2,15831827483625	4,4	0,0639939897827979	NA	NA	NA	4,5	3	1	1	4	5	4,5	52	3,6	Female	-1,49406087602079	T2	6,12047141796585	-3,43789903489235	-0,193615441722346	mei	5	4	Week	Thursday	69	-3,39792130660727	0	Control	Control
33	primary	new	301	Control	4001	0	10	0	5	2018-03-09	2	1	16749	129	observed	6,5	5,8	5,1	-0,106050778421126	4,9	0,563993989782798	6	5	5	6	6	4,67	2,33	5	5	5	75	4,75	Male	-1,49406087602079	T1	-5,67952858203415	-0,737899034892354	4,20638455827765	maart	3	5	Week	Friday	82	9,60207869339273	0	Control	Control
33	primary	new	301	Control	3999	0	9	0	5	2018-03-12	5	1	6912	37	observed	10,3	2,6	1,8	1,5382621522363	5,1	0,763993989782797	4	2	3	6	6	2,67	1	6	6	6	100	6	Male	-2,49406087602079	T1	-1,87952858203415	-3,93789903489235	0,906384558277654	maart	3	1	Week	Monday	85	12,6020786933927	0	Control	Control
33	primary	new	301	Control	3999	0	9	0	6	2018-05-28	5	1	7858	68	observed	22,5	11,6	0,3	1,5382621522363	5,1	0,763993989782797	7	5	3	6	6	2,67	3,67	6	6	6	100	6	Male	-2,49406087602079	T2	10,3204714179658	5,06210096510765	-0,593615441722346	mei	5	1	Week	Monday	69	-3,39792130660727	0	Control	Control
33	primary	new	301	Control	3999	0	9	0	6	2018-05-26	3	1	8425	18	observed	23	11,9	0	1,5382621522363	5,1	0,763993989782797	7	5	3	6	6	2,67	3,67	6	6	6	100	6	Male	-2,49406087602079	T2	10,8204714179658	5,36210096510765	-0,893615441722346	mei	5	6	Weekend	Saturday	59	-13,3979213066073	0	Control	Control
33	primary	new	301	Control	3999	0	9	0	6	2018-05-27	4	1	8758	16	observed	20,3	3,1	1,9	1,5382621522363	5,1	0,763993989782797	7	5	3	6	6	2,67	3,67	6	6	6	100	6	Male	-2,49406087602079	T2	8,12047141796585	-3,43789903489235	1,00638455827765	mei	5	0	Weekend	Sunday	71	-1,39792130660727	0	Control	Control
33	primary	new	301	Control	3999	0	9	0	6	2018-05-25	2	1	11336	39	observed	20,6	10,5	0	1,5382621522363	5,1	0,763993989782797	7	5	3	6	6	2,67	3,67	6	6	6	100	6	Male	-2,49406087602079	T2	8,42047141796585	3,96210096510765	-0,893615441722346	mei	5	5	Week	Friday	73	0,602078693392727	0	Control	Control
33	primary	new	301	Control	3999	0	9	0	6	2018-05-24	1	1	20970	171	observed	18,3	3,1	0,7	1,5382621522363	5,1	0,763993989782797	7	5	3	6	6	2,67	3,67	6	6	6	100	6	Male	-2,49406087602079	T2	6,12047141796585	-3,43789903489235	-0,193615441722346	mei	5	4	Week	Thursday	69	-3,39792130660727	0	Control	Control
33	primary	new	301	Control	4011	0	9	0	6	2018-05-27	4	1	3427	11	observed	20,3	3,1	1,9	2,76658655383061	3,3	-1,0360060102172	4	5	4	5,5	3,33	5,67	2	5	2	3,5	61	4,05	Male	-2,49406087602079	T2	8,12047141796585	-3,43789903489235	1,00638455827765	mei	5	0	Weekend	Sunday	71	-1,39792130660727	0	Control	Control
33	primary	new	301	Control	3976	1	10	0	7	2018-06-21	1	1	12809	22	observed	14,4	8,1	0	2,15831827483625	4,4	0,0639939897827979	5	6	6	6	6	6	6	5	6	5,5	100	6	Female	-1,49406087602079	T3	2,22047141796585	1,56210096510765	-0,893615441722346	juni	6	4	Week	Thursday	68	-4,39792130660727	0	Control	Control
33	primary	new	301	Control	3999	0	9	0	7	2018-06-21	1	1	13316	86	observed	14,4	8,1	0	1,5382621522363	5,1	0,763993989782797	6	2	2	6	6	4,33	5	6	6	6	99	5,95	Male	-2,49406087602079	T3	2,22047141796585	1,56210096510765	-0,893615441722346	juni	6	4	Week	Thursday	68	-4,39792130660727	0	Control	Control
33	primary	new	301	Control	3999	0	9	0	7	2018-06-24	4	1	9235	45	observed	14,7	0,7	0	1,5382621522363	5,1	0,763993989782797	6	2	2	6	6	4,33	5	6	6	6	99	5,95	Male	-2,49406087602079	T3	2,52047141796585	-5,83789903489235	-0,893615441722346	juni	6	0	Weekend	Sunday	78	5,60207869339273	0	Control	Control
33	primary	new	301	Control	3999	0	9	0	7	2018-06-22	2	1	12379	75	observed	13,3	1,5	0	1,5382621522363	5,1	0,763993989782797	6	2	2	6	6	4,33	5	6	6	6	99	5,95	Male	-2,49406087602079	T3	1,12047141796585	-5,03789903489235	-0,893615441722346	juni	6	5	Week	Friday	68	-4,39792130660727	0	Control	Control
33	primary	new	301	Control	3999	0	9	0	7	2018-06-23	3	1	9306	48	observed	15,1	4,9	0	1,5382621522363	5,1	0,763993989782797	6	2	2	6	6	4,33	5	6	6	6	99	5,95	Male	-2,49406087602079	T3	2,92047141796585	-1,63789903489235	-0,893615441722346	juni	6	6	Weekend	Saturday	71	-1,39792130660727	0	Control	Control
33	primary	new	301	Control	4007	0	10	0	7	2018-06-22	2	0	15976	80	imputed	13,3	1,5	0	1,43032502356024	4,9	0,563993989782798	NA	NA	NA	NA	NA	NA	NA	NA	NA	NA	NA	NA	Male	-1,49406087602079	T3	1,12047141796585	-5,03789903489235	-0,893615441722346	juni	6	5	Week	Friday	68	-4,39792130660727	0	Control	Control
33	primary	new	301	Control	4007	0	10	0	7	2018-06-23	3	0	22490	71	imputed	15,1	4,9	0	1,43032502356024	4,9	0,563993989782798	NA	NA	NA	NA	NA	NA	NA	NA	NA	NA	NA	NA	Male	-1,49406087602079	T3	2,92047141796585	-1,63789903489235	-0,893615441722346	juni	6	6	Weekend	Saturday	71	-1,39792130660727	0	Control	Control
33	primary	new	301	Control	4010	0	9	0	5	2018-03-09	2	1	8972	7	observed	6,5	5,8	5,1	0,771013309252592	2,6	-1,7360060102172	0	0	2	5	5,33	1,33	1,33	2	5	3,5	75	4,75	Male	-2,49406087602079	T1	-5,67952858203415	-0,737899034892354	4,20638455827765	maart	3	5	Week	Friday	82	9,60207869339273	0	Control	Control
33	primary	new	301	Control	4010	0	9	0	5	2018-03-10	3	1	13347	52	observed	11,4	1,8	6,6	0,771013309252592	2,6	-1,7360060102172	0	0	2	5	5,33	1,33	1,33	2	5	3,5	75	4,75	Male	-2,49406087602079	T1	-0,77952858203415	-4,73789903489235	5,70638455827765	maart	3	6	Weekend	Saturday	89	16,6020786933927	0	Control	Control
33	primary	new	301	Control	4001	0	10	0	5	2018-03-10	3	1	19560	209	observed	11,4	1,8	6,6	-0,106050778421126	4,9	0,563993989782798	6	5	5	6	6	4,67	2,33	5	5	5	75	4,75	Male	-1,49406087602079	T1	-0,77952858203415	-4,73789903489235	5,70638455827765	maart	3	6	Weekend	Saturday	89	16,6020786933927	0	Control	Control
33	primary	new	301	Control	3976	1	10	0	7	2018-06-25	5	1	19643	128	observed	16,5	9,6	0	2,15831827483625	4,4	0,0639939897827979	5	6	6	6	6	6	6	5	6	5,5	100	6	Female	-1,49406087602079	T3	4,32047141796585	3,06210096510765	-0,893615441722346	juni	6	1	Week	Monday	75	2,60207869339273	0	Control	Control
33	primary	new	301	Control	4012	1	9	0	6	2018-05-25	2	1	11371	10	observed	20,6	10,5	0	-0,574488288898873	4,5	0,163993989782798	2	1	2	4,5	6	2	1,33	5	5	5	100	6	Female	-2,49406087602079	T2	8,42047141796585	3,96210096510765	-0,893615441722346	mei	5	5	Week	Friday	73	0,602078693392727	0	Control	Control
33	primary	new	301	Control	4012	1	9	0	6	2018-05-27	4	1	14977	72	observed	20,3	3,1	1,9	-0,574488288898873	4,5	0,163993989782798	2	1	2	4,5	6	2	1,33	5	5	5	100	6	Female	-2,49406087602079	T2	8,12047141796585	-3,43789903489235	1,00638455827765	mei	5	0	Weekend	Sunday	71	-1,39792130660727	0	Control	Control
33	primary	new	301	Control	4012	1	9	0	6	2018-05-24	1	1	15544	34	imputed	18,3	3,1	0,7	-0,574488288898873	4,5	0,163993989782798	2	1	2	4,5	6	2	1,33	5	5	5	100	6	Female	-2,49406087602079	T2	6,12047141796585	-3,43789903489235	-0,193615441722346	mei	5	4	Week	Thursday	69	-3,39792130660727	0	Control	Control
33	primary	new	301	Control	4012	1	9	0	6	2018-05-28	5	1	18022	116	observed	22,5	11,6	0,3	-0,574488288898873	4,5	0,163993989782798	2	1	2	4,5	6	2	1,33	5	5	5	100	6	Female	-2,49406087602079	T2	10,3204714179658	5,06210096510765	-0,593615441722346	mei	5	1	Week	Monday	69	-3,39792130660727	0	Control	Control
33	primary	new	301	Control	3999	0	9	0	5	2018-03-11	4	1	9111	47	observed	10,2	2,5	1	1,5382621522363	5,1	0,763993989782797	4	2	3	6	6	2,67	1	6	6	6	100	6	Male	-2,49406087602079	T1	-1,97952858203415	-4,03789903489235	0,106384558277654	maart	3	0	Weekend	Sunday	91	18,6020786933927	0	Control	Control
33	primary	new	301	Control	3999	0	9	0	5	2018-03-10	3	1	10332	71	observed	11,4	1,8	6,6	1,5382621522363	5,1	0,763993989782797	4	2	3	6	6	2,67	1	6	6	6	100	6	Male	-2,49406087602079	T1	-0,77952858203415	-4,73789903489235	5,70638455827765	maart	3	6	Weekend	Saturday	89	16,6020786933927	0	Control	Control
33	primary	new	301	Control	3999	0	9	0	5	2018-03-09	2	1	9188	43	observed	6,5	5,8	5,1	1,5382621522363	5,1	0,763993989782797	4	2	3	6	6	2,67	1	6	6	6	100	6	Male	-2,49406087602079	T1	-5,67952858203415	-0,737899034892354	4,20638455827765	maart	3	5	Week	Friday	82	9,60207869339273	0	Control	Control
33	primary	new	301	Control	3999	0	9	0	5	2018-03-08	1	1	9313	38	observed	4,8	2	3,2	1,5382621522363	5,1	0,763993989782797	4	2	3	6	6	2,67	1	6	6	6	100	6	Male	-2,49406087602079	T1	-7,37952858203415	-4,53789903489235	2,30638455827765	maart	3	4	Week	Thursday	84	11,6020786933927	0	Control	Control
33	primary	new	301	Control	4012	1	9	0	5	2018-03-12	5	1	9235	30	observed	10,3	2,6	1,8	-0,574488288898873	4,5	0,163993989782798	3	3	3	6	6	2,67	1	5	4	4,5	100	6	Female	-2,49406087602079	T1	-1,87952858203415	-3,93789903489235	0,906384558277654	maart	3	1	Week	Monday	85	12,6020786933927	0	Control	Control
33	primary	new	301	Control	4012	1	9	0	5	2018-03-11	4	1	6110	33	observed	10,2	2,5	1	-0,574488288898873	4,5	0,163993989782798	3	3	3	6	6	2,67	1	5	4	4,5	100	6	Female	-2,49406087602079	T1	-1,97952858203415	-4,03789903489235	0,106384558277654	maart	3	0	Weekend	Sunday	91	18,6020786933927	0	Control	Control
33	primary	new	301	Control	4012	1	9	0	5	2018-03-10	3	1	6764	0	observed	11,4	1,8	6,6	-0,574488288898873	4,5	0,163993989782798	3	3	3	6	6	2,67	1	5	4	4,5	100	6	Female	-2,49406087602079	T1	-0,77952858203415	-4,73789903489235	5,70638455827765	maart	3	6	Weekend	Saturday	89	16,6020786933927	0	Control	Control
33	primary	new	301	Control	4012	1	9	0	5	2018-03-08	1	1	6636	29	observed	4,8	2	3,2	-0,574488288898873	4,5	0,163993989782798	3	3	3	6	6	2,67	1	5	4	4,5	100	6	Female	-2,49406087602079	T1	-7,37952858203415	-4,53789903489235	2,30638455827765	maart	3	4	Week	Thursday	84	11,6020786933927	0	Control	Control
33	primary	new	301	Control	4012	1	9	0	5	2018-03-09	2	1	6687	10	observed	6,5	5,8	5,1	-0,574488288898873	4,5	0,163993989782798	3	3	3	6	6	2,67	1	5	4	4,5	100	6	Female	-2,49406087602079	T1	-5,67952858203415	-0,737899034892354	4,20638455827765	maart	3	5	Week	Friday	82	9,60207869339273	0	Control	Control
33	primary	new	301	Control	4013	1	9	0	5	2018-03-10	3	1	14199	101	observed	11,4	1,8	6,6	-1,01268116956191	4,65	0,313993989782798	2	2	0	5,5	6	1	1	5	6	5,5	100	6	Female	-2,49406087602079	T1	-0,77952858203415	-4,73789903489235	5,70638455827765	maart	3	6	Weekend	Saturday	89	16,6020786933927	0	Control	Control
33	primary	new	301	Control	4001	0	10	0	6	2018-05-24	1	1	16416	117	observed	18,3	3,1	0,7	-0,106050778421126	4,9	0,563993989782798	7	3	3	6	6	1	1	6	6	6	88	5,4	Male	-1,49406087602079	T2	6,12047141796585	-3,43789903489235	-0,193615441722346	mei	5	4	Week	Thursday	69	-3,39792130660727	0	Control	Control
33	primary	new	301	Control	4001	0	10	0	6	2018-05-25	2	1	17494	107	observed	20,6	10,5	0	-0,106050778421126	4,9	0,563993989782798	7	3	3	6	6	1	1	6	6	6	88	5,4	Male	-1,49406087602079	T2	8,42047141796585	3,96210096510765	-0,893615441722346	mei	5	5	Week	Friday	73	0,602078693392727	0	Control	Control
33	primary	new	301	Control	4001	0	10	0	6	2018-05-26	3	1	13334	55	observed	23	11,9	0	-0,106050778421126	4,9	0,563993989782798	7	3	3	6	6	1	1	6	6	6	88	5,4	Male	-1,49406087602079	T2	10,8204714179658	5,36210096510765	-0,893615441722346	mei	5	6	Weekend	Saturday	59	-13,3979213066073	0	Control	Control
33	primary	new	301	Control	4012	1	9	0	6	2018-05-26	3	1	14327	27	observed	23	11,9	0	-0,574488288898873	4,5	0,163993989782798	2	1	2	4,5	6	2	1,33	5	5	5	100	6	Female	-2,49406087602079	T2	10,8204714179658	5,36210096510765	-0,893615441722346	mei	5	6	Weekend	Saturday	59	-13,3979213066073	0	Control	Control
33	primary	new	301	Control	4012	1	9	0	7	2018-06-23	3	1	12902	53	observed	15,1	4,9	0	-0,574488288898873	4,5	0,163993989782798	7	3	4	6	6	1,33	1	5	6	5,5	100	6	Female	-2,49406087602079	T3	2,92047141796585	-1,63789903489235	-0,893615441722346	juni	6	6	Weekend	Saturday	71	-1,39792130660727	0	Control	Control
33	primary	new	301	Control	4012	1	9	0	7	2018-06-25	5	1	1223	0	observed	16,5	9,6	0	-0,574488288898873	4,5	0,163993989782798	7	3	4	6	6	1,33	1	5	6	5,5	100	6	Female	-2,49406087602079	T3	4,32047141796585	3,06210096510765	-0,893615441722346	juni	6	1	Week	Monday	75	2,60207869339273	0	Control	Control
33	primary	new	301	Control	4012	1	9	0	7	2018-06-21	1	1	7804	19	observed	14,4	8,1	0	-0,574488288898873	4,5	0,163993989782798	7	3	4	6	6	1,33	1	5	6	5,5	100	6	Female	-2,49406087602079	T3	2,22047141796585	1,56210096510765	-0,893615441722346	juni	6	4	Week	Thursday	68	-4,39792130660727	0	Control	Control
33	primary	new	301	Control	4012	1	9	0	7	2018-06-22	2	1	9639	45	observed	13,3	1,5	0	-0,574488288898873	4,5	0,163993989782798	7	3	4	6	6	1,33	1	5	6	5,5	100	6	Female	-2,49406087602079	T3	1,12047141796585	-5,03789903489235	-0,893615441722346	juni	6	5	Week	Friday	68	-4,39792130660727	0	Control	Control
33	primary	new	301	Control	4012	1	9	0	7	2018-06-24	4	1	7543	30	observed	14,7	0,7	0	-0,574488288898873	4,5	0,163993989782798	7	3	4	6	6	1,33	1	5	6	5,5	100	6	Female	-2,49406087602079	T3	2,52047141796585	-5,83789903489235	-0,893615441722346	juni	6	0	Weekend	Sunday	78	5,60207869339273	0	Control	Control
33	primary	new	301	Control	4013	1	9	0	5	2018-03-11	4	1	10413	42	observed	10,2	2,5	1	-1,01268116956191	4,65	0,313993989782798	2	2	0	5,5	6	1	1	5	6	5,5	100	6	Female	-2,49406087602079	T1	-1,97952858203415	-4,03789903489235	0,106384558277654	maart	3	0	Weekend	Sunday	91	18,6020786933927	0	Control	Control
33	primary	new	301	Control	4011	0	9	0	6	2018-05-28	5	1	14208	90	observed	22,5	11,6	0,3	2,76658655383061	3,3	-1,0360060102172	4	5	4	5,5	3,33	5,67	2	5	2	3,5	61	4,05	Male	-2,49406087602079	T2	10,3204714179658	5,06210096510765	-0,593615441722346	mei	5	1	Week	Monday	69	-3,39792130660727	0	Control	Control
33	primary	new	301	Control	4002	0	10	0	6	2018-05-25	2	1	20137	126	observed	20,6	10,5	0	-0,76927054991442	3,7	-0,636006010217202	6	6	7	6	6	6	6	6	6	6	99	5,95	Male	-1,49406087602079	T2	8,42047141796585	3,96210096510765	-0,893615441722346	mei	5	5	Week	Friday	73	0,602078693392727	0	Control	Control
33	primary	new	301	Control	4011	0	9	0	6	2018-05-25	2	1	14679	94	observed	20,6	10,5	0	2,76658655383061	3,3	-1,0360060102172	4	5	4	5,5	3,33	5,67	2	5	2	3,5	61	4,05	Male	-2,49406087602079	T2	8,42047141796585	3,96210096510765	-0,893615441722346	mei	5	5	Week	Friday	73	0,602078693392727	0	Control	Control
33	primary	new	301	Control	4011	0	9	0	7	2018-06-23	3	1	13880	113	observed	15,1	4,9	0	2,76658655383061	3,3	-1,0360060102172	2	2	7	6	4,67	4,67	1	6	3	4,5	56	3,8	Male	-2,49406087602079	T3	2,92047141796585	-1,63789903489235	-0,893615441722346	juni	6	6	Weekend	Saturday	71	-1,39792130660727	0	Control	Control
33	primary	new	301	Control	4011	0	9	0	7	2018-06-21	1	1	14417	102	observed	14,4	8,1	0	2,76658655383061	3,3	-1,0360060102172	2	2	7	6	4,67	4,67	1	6	3	4,5	56	3,8	Male	-2,49406087602079	T3	2,22047141796585	1,56210096510765	-0,893615441722346	juni	6	4	Week	Thursday	68	-4,39792130660727	0	Control	Control
33	primary	new	301	Control	4011	0	9	0	7	2018-06-24	4	1	9998	68	observed	14,7	0,7	0	2,76658655383061	3,3	-1,0360060102172	2	2	7	6	4,67	4,67	1	6	3	4,5	56	3,8	Male	-2,49406087602079	T3	2,52047141796585	-5,83789903489235	-0,893615441722346	juni	6	0	Weekend	Sunday	78	5,60207869339273	0	Control	Control
33	primary	new	301	Control	4011	0	9	0	7	2018-06-22	2	1	16088	82	observed	13,3	1,5	0	2,76658655383061	3,3	-1,0360060102172	2	2	7	6	4,67	4,67	1	6	3	4,5	56	3,8	Male	-2,49406087602079	T3	1,12047141796585	-5,03789903489235	-0,893615441722346	juni	6	5	Week	Friday	68	-4,39792130660727	0	Control	Control
33	primary	new	301	Control	4011	0	9	0	7	2018-06-25	5	1	11823	74	observed	16,5	9,6	0	2,76658655383061	3,3	-1,0360060102172	2	2	7	6	4,67	4,67	1	6	3	4,5	56	3,8	Male	-2,49406087602079	T3	4,32047141796585	3,06210096510765	-0,893615441722346	juni	6	1	Week	Monday	75	2,60207869339273	0	Control	Control
33	primary	new	301	Control	4003	0	9	0	5	2018-03-08	1	1	8500	35	observed	4,8	2	3,2	-0,345755423315722	3,6	-0,736006010217202	5	4	4	3	3,67	4	4	6	4	5	100	6	Male	-2,49406087602079	T1	-7,37952858203415	-4,53789903489235	2,30638455827765	maart	3	4	Week	Thursday	84	11,6020786933927	0	Control	Control
33	primary	new	301	Control	4003	0	9	0	5	2018-03-09	2	1	12344	95	observed	6,5	5,8	5,1	-0,345755423315722	3,6	-0,736006010217202	5	4	4	3	3,67	4	4	6	4	5	100	6	Male	-2,49406087602079	T1	-5,67952858203415	-0,737899034892354	4,20638455827765	maart	3	5	Week	Friday	82	9,60207869339273	0	Control	Control
33	primary	new	301	Control	4003	0	9	0	5	2018-03-10	3	1	8339	17	imputed	11,4	1,8	6,6	-0,345755423315722	3,6	-0,736006010217202	5	4	4	3	3,67	4	4	6	4	5	100	6	Male	-2,49406087602079	T1	-0,77952858203415	-4,73789903489235	5,70638455827765	maart	3	6	Weekend	Saturday	89	16,6020786933927	0	Control	Control
33	primary	new	301	Control	4003	0	9	0	5	2018-03-11	4	1	5184	16	observed	10,2	2,5	1	-0,345755423315722	3,6	-0,736006010217202	5	4	4	3	3,67	4	4	6	4	5	100	6	Male	-2,49406087602079	T1	-1,97952858203415	-4,03789903489235	0,106384558277654	maart	3	0	Weekend	Sunday	91	18,6020786933927	0	Control	Control
33	primary	new	301	Control	4003	0	9	0	6	2018-05-25	2	1	3089	0	observed	20,6	10,5	0	-0,345755423315722	3,6	-0,736006010217202	7	4	3	6	5,67	4	4,33	2	2	2	100	6	Male	-2,49406087602079	T2	8,42047141796585	3,96210096510765	-0,893615441722346	mei	5	5	Week	Friday	73	0,602078693392727	0	Control	Control
33	primary	new	301	Control	4003	0	9	0	6	2018-05-27	4	1	1732	0	observed	20,3	3,1	1,9	-0,345755423315722	3,6	-0,736006010217202	7	4	3	6	5,67	4	4,33	2	2	2	100	6	Male	-2,49406087602079	T2	8,12047141796585	-3,43789903489235	1,00638455827765	mei	5	0	Weekend	Sunday	71	-1,39792130660727	0	Control	Control
33	primary	new	301	Control	4003	0	9	0	6	2018-05-28	5	1	1683	0	observed	22,5	11,6	0,3	-0,345755423315722	3,6	-0,736006010217202	7	4	3	6	5,67	4	4,33	2	2	2	100	6	Male	-2,49406087602079	T2	10,3204714179658	5,06210096510765	-0,593615441722346	mei	5	1	Week	Monday	69	-3,39792130660727	0	Control	Control
33	primary	new	301	Control	4003	0	9	0	6	2018-05-26	3	1	1249	0	observed	23	11,9	0	-0,345755423315722	3,6	-0,736006010217202	7	4	3	6	5,67	4	4,33	2	2	2	100	6	Male	-2,49406087602079	T2	10,8204714179658	5,36210096510765	-0,893615441722346	mei	5	6	Weekend	Saturday	59	-13,3979213066073	0	Control	Control
33	primary	new	301	Control	4003	0	9	0	6	2018-05-24	1	1	2196	0	observed	18,3	3,1	0,7	-0,345755423315722	3,6	-0,736006010217202	7	4	3	6	5,67	4	4,33	2	2	2	100	6	Male	-2,49406087602079	T2	6,12047141796585	-3,43789903489235	-0,193615441722346	mei	5	4	Week	Thursday	69	-3,39792130660727	0	Control	Control
33	primary	new	301	Control	4003	0	9	0	7	2018-06-23	3	1	15440	75	observed	15,1	4,9	0	-0,345755423315722	3,6	-0,736006010217202	3	5	6	5	5	4,33	3,67	5	4	4,5	100	6	Male	-2,49406087602079	T3	2,92047141796585	-1,63789903489235	-0,893615441722346	juni	6	6	Weekend	Saturday	71	-1,39792130660727	0	Control	Control
33	primary	new	301	Control	4003	0	9	0	7	2018-06-25	5	1	20443	137	observed	16,5	9,6	0	-0,345755423315722	3,6	-0,736006010217202	3	5	6	5	5	4,33	3,67	5	4	4,5	100	6	Male	-2,49406087602079	T3	4,32047141796585	3,06210096510765	-0,893615441722346	juni	6	1	Week	Monday	75	2,60207869339273	0	Control	Control
33	primary	new	301	Control	4003	0	9	0	7	2018-06-24	4	1	17067	139	observed	14,7	0,7	0	-0,345755423315722	3,6	-0,736006010217202	3	5	6	5	5	4,33	3,67	5	4	4,5	100	6	Male	-2,49406087602079	T3	2,52047141796585	-5,83789903489235	-0,893615441722346	juni	6	0	Weekend	Sunday	78	5,60207869339273	0	Control	Control
33	primary	new	301	Control	4003	0	9	0	7	2018-06-22	2	1	16380	114	observed	13,3	1,5	0	-0,345755423315722	3,6	-0,736006010217202	3	5	6	5	5	4,33	3,67	5	4	4,5	100	6	Male	-2,49406087602079	T3	1,12047141796585	-5,03789903489235	-0,893615441722346	juni	6	5	Week	Friday	68	-4,39792130660727	0	Control	Control
33	primary	new	301	Control	4003	0	9	0	7	2018-06-21	1	1	9905	58	observed	14,4	8,1	0	-0,345755423315722	3,6	-0,736006010217202	3	5	6	5	5	4,33	3,67	5	4	4,5	100	6	Male	-2,49406087602079	T3	2,22047141796585	1,56210096510765	-0,893615441722346	juni	6	4	Week	Thursday	68	-4,39792130660727	0	Control	Control
33	primary	new	301	Control	4005	1	9	0	5	2018-03-09	2	1	9791	22	observed	6,5	5,8	5,1	0,52331268535746	4,3	-0,0360060102172026	4	2	3	6	6	1,33	1,33	6	1	3,5	100	6	Female	-2,49406087602079	T1	-5,67952858203415	-0,737899034892354	4,20638455827765	maart	3	5	Week	Friday	82	9,60207869339273	0	Control	Control
33	primary	new	301	Control	4005	1	9	0	5	2018-03-08	1	1	8709	26	observed	4,8	2	3,2	0,52331268535746	4,3	-0,0360060102172026	4	2	3	6	6	1,33	1,33	6	1	3,5	100	6	Female	-2,49406087602079	T1	-7,37952858203415	-4,53789903489235	2,30638455827765	maart	3	4	Week	Thursday	84	11,6020786933927	0	Control	Control
33	primary	new	301	Control	4005	1	9	0	5	2018-03-10	3	1	2746	0	observed	11,4	1,8	6,6	0,52331268535746	4,3	-0,0360060102172026	4	2	3	6	6	1,33	1,33	6	1	3,5	100	6	Female	-2,49406087602079	T1	-0,77952858203415	-4,73789903489235	5,70638455827765	maart	3	6	Weekend	Saturday	89	16,6020786933927	0	Control	Control
33	primary	new	301	Control	4005	1	9	0	6	2018-05-24	1	1	10065	34	observed	18,3	3,1	0,7	0,52331268535746	4,3	-0,0360060102172026	1	3	4	4	6	1	1	1	1	1	100	6	Female	-2,49406087602079	T2	6,12047141796585	-3,43789903489235	-0,193615441722346	mei	5	4	Week	Thursday	69	-3,39792130660727	0	Control	Control
33	primary	new	301	Control	4005	1	9	0	6	2018-05-26	3	1	10459	33	observed	23	11,9	0	0,52331268535746	4,3	-0,0360060102172026	1	3	4	4	6	1	1	1	1	1	100	6	Female	-2,49406087602079	T2	10,8204714179658	5,36210096510765	-0,893615441722346	mei	5	6	Weekend	Saturday	59	-13,3979213066073	0	Control	Control
33	primary	new	301	Control	4005	1	9	0	6	2018-05-27	4	1	2102	11	observed	20,3	3,1	1,9	0,52331268535746	4,3	-0,0360060102172026	1	3	4	4	6	1	1	1	1	1	100	6	Female	-2,49406087602079	T2	8,12047141796585	-3,43789903489235	1,00638455827765	mei	5	0	Weekend	Sunday	71	-1,39792130660727	0	Control	Control
33	primary	new	301	Control	4005	1	9	0	6	2018-05-25	2	1	16581	34	observed	20,6	10,5	0	0,52331268535746	4,3	-0,0360060102172026	1	3	4	4	6	1	1	1	1	1	100	6	Female	-2,49406087602079	T2	8,42047141796585	3,96210096510765	-0,893615441722346	mei	5	5	Week	Friday	73	0,602078693392727	0	Control	Control
33	primary	new	301	Control	4001	0	10	0	6	2018-05-27	4	1	11233	58	observed	20,3	3,1	1,9	-0,106050778421126	4,9	0,563993989782798	7	3	3	6	6	1	1	6	6	6	88	5,4	Male	-1,49406087602079	T2	8,12047141796585	-3,43789903489235	1,00638455827765	mei	5	0	Weekend	Sunday	71	-1,39792130660727	0	Control	Control
33	primary	new	301	Control	4001	0	10	0	7	2018-06-21	1	1	1000	42	imputed	14,4	8,1	0	-0,106050778421126	4,9	0,563993989782798	NA	NA	NA	NA	NA	NA	NA	NA	NA	NA	NA	NA	Male	-1,49406087602079	T3	2,22047141796585	1,56210096510765	-0,893615441722346	juni	6	4	Week	Thursday	68	-4,39792130660727	0	Control	Control
33	primary	new	301	Control	4001	0	10	0	7	2018-06-22	2	1	3562	39	imputed	13,3	1,5	0	-0,106050778421126	4,9	0,563993989782798	NA	NA	NA	NA	NA	NA	NA	NA	NA	NA	NA	NA	Male	-1,49406087602079	T3	1,12047141796585	-5,03789903489235	-0,893615441722346	juni	6	5	Week	Friday	68	-4,39792130660727	0	Control	Control
33	primary	new	301	Control	4001	0	10	0	7	2018-06-23	3	1	8324	76	imputed	15,1	4,9	0	-0,106050778421126	4,9	0,563993989782798	NA	NA	NA	NA	NA	NA	NA	NA	NA	NA	NA	NA	Male	-1,49406087602079	T3	2,92047141796585	-1,63789903489235	-0,893615441722346	juni	6	6	Weekend	Saturday	71	-1,39792130660727	0	Control	Control
33	primary	new	301	Control	4002	0	10	0	5	2018-03-12	5	1	1581	10	observed	10,3	2,6	1,8	-0,76927054991442	3,7	-0,636006010217202	1	0	6	2	3	3	4	6	6	6	100	6	Male	-1,49406087602079	T1	-1,87952858203415	-3,93789903489235	0,906384558277654	maart	3	1	Week	Monday	85	12,6020786933927	0	Control	Control
33	primary	new	301	Control	4002	0	10	0	5	2018-03-09	2	1	9830	42	observed	6,5	5,8	5,1	-0,76927054991442	3,7	-0,636006010217202	1	0	6	2	3	3	4	6	6	6	100	6	Male	-1,49406087602079	T1	-5,67952858203415	-0,737899034892354	4,20638455827765	maart	3	5	Week	Friday	82	9,60207869339273	0	Control	Control
33	primary	new	301	Control	4002	0	10	0	5	2018-03-11	4	1	4155	0	observed	10,2	2,5	1	-0,76927054991442	3,7	-0,636006010217202	1	0	6	2	3	3	4	6	6	6	100	6	Male	-1,49406087602079	T1	-1,97952858203415	-4,03789903489235	0,106384558277654	maart	3	0	Weekend	Sunday	91	18,6020786933927	0	Control	Control
33	primary	new	301	Control	4002	0	10	0	5	2018-03-08	1	1	8773	30	observed	4,8	2	3,2	-0,76927054991442	3,7	-0,636006010217202	1	0	6	2	3	3	4	6	6	6	100	6	Male	-1,49406087602079	T1	-7,37952858203415	-4,53789903489235	2,30638455827765	maart	3	4	Week	Thursday	84	11,6020786933927	0	Control	Control
33	primary	new	301	Control	4002	0	10	0	5	2018-03-10	3	1	14637	140	observed	11,4	1,8	6,6	-0,76927054991442	3,7	-0,636006010217202	1	0	6	2	3	3	4	6	6	6	100	6	Male	-1,49406087602079	T1	-0,77952858203415	-4,73789903489235	5,70638455827765	maart	3	6	Weekend	Saturday	89	16,6020786933927	0	Control	Control
33	primary	new	301	Control	4002	0	10	0	6	2018-05-27	4	1	3456	0	observed	20,3	3,1	1,9	-0,76927054991442	3,7	-0,636006010217202	6	6	7	6	6	6	6	6	6	6	99	5,95	Male	-1,49406087602079	T2	8,12047141796585	-3,43789903489235	1,00638455827765	mei	5	0	Weekend	Sunday	71	-1,39792130660727	0	Control	Control
33	primary	new	301	Control	4006	1	10	0	6	2018-05-24	1	1	10153	41	observed	18,3	3,1	0,7	-0,0256805181183002	4,9	0,563993989782798	3	3	4	5	6	1	1	6	6	6	100	6	Female	-1,49406087602079	T2	6,12047141796585	-3,43789903489235	-0,193615441722346	mei	5	4	Week	Thursday	69	-3,39792130660727	0	Control	Control
33	primary	new	301	Control	4002	0	10	0	6	2018-05-28	5	1	6998	13	observed	22,5	11,6	0,3	-0,76927054991442	3,7	-0,636006010217202	6	6	7	6	6	6	6	6	6	6	99	5,95	Male	-1,49406087602079	T2	10,3204714179658	5,06210096510765	-0,593615441722346	mei	5	1	Week	Monday	69	-3,39792130660727	0	Control	Control
33	primary	new	301	Control	4002	0	10	0	6	2018-05-24	1	1	13978	94	observed	18,3	3,1	0,7	-0,76927054991442	3,7	-0,636006010217202	6	6	7	6	6	6	6	6	6	6	99	5,95	Male	-1,49406087602079	T2	6,12047141796585	-3,43789903489235	-0,193615441722346	mei	5	4	Week	Thursday	69	-3,39792130660727	0	Control	Control
33	primary	new	301	Control	4002	0	10	0	6	2018-05-26	3	1	8120	42	observed	23	11,9	0	-0,76927054991442	3,7	-0,636006010217202	6	6	7	6	6	6	6	6	6	6	99	5,95	Male	-1,49406087602079	T2	10,8204714179658	5,36210096510765	-0,893615441722346	mei	5	6	Weekend	Saturday	59	-13,3979213066073	0	Control	Control
33	primary	new	301	Control	4002	0	10	0	7	2018-06-21	1	1	1679	0	observed	14,4	8,1	0	-0,76927054991442	3,7	-0,636006010217202	4	5	4	5,5	5,33	5,67	5,33	3	3	3	81	5,05	Male	-1,49406087602079	T3	2,22047141796585	1,56210096510765	-0,893615441722346	juni	6	4	Week	Thursday	68	-4,39792130660727	0	Control	Control
33	primary	new	301	Control	4002	0	10	0	7	2018-06-23	3	1	1908	0	observed	15,1	4,9	0	-0,76927054991442	3,7	-0,636006010217202	4	5	4	5,5	5,33	5,67	5,33	3	3	3	81	5,05	Male	-1,49406087602079	T3	2,92047141796585	-1,63789903489235	-0,893615441722346	juni	6	6	Weekend	Saturday	71	-1,39792130660727	0	Control	Control
33	primary	new	301	Control	4002	0	10	0	7	2018-06-22	2	1	1801	0	observed	13,3	1,5	0	-0,76927054991442	3,7	-0,636006010217202	4	5	4	5,5	5,33	5,67	5,33	3	3	3	81	5,05	Male	-1,49406087602079	T3	1,12047141796585	-5,03789903489235	-0,893615441722346	juni	6	5	Week	Friday	68	-4,39792130660727	0	Control	Control
33	primary	new	301	Control	4002	0	10	0	7	2018-06-24	4	1	1179	0	observed	14,7	0,7	0	-0,76927054991442	3,7	-0,636006010217202	4	5	4	5,5	5,33	5,67	5,33	3	3	3	81	5,05	Male	-1,49406087602079	T3	2,52047141796585	-5,83789903489235	-0,893615441722346	juni	6	0	Weekend	Sunday	78	5,60207869339273	0	Control	Control
33	primary	new	301	Control	4006	1	10	0	7	2018-06-22	2	1	11744	53	observed	13,3	1,5	0	-0,0256805181183002	4,9	0,563993989782798	5	6	4	3	6	1	1	6	6	6	100	6	Female	-1,49406087602079	T3	1,12047141796585	-5,03789903489235	-0,893615441722346	juni	6	5	Week	Friday	68	-4,39792130660727	0	Control	Control
33	primary	new	301	Control	4006	1	10	0	7	2018-06-21	1	1	9155	25	observed	14,4	8,1	0	-0,0256805181183002	4,9	0,563993989782798	5	6	4	3	6	1	1	6	6	6	100	6	Female	-1,49406087602079	T3	2,22047141796585	1,56210096510765	-0,893615441722346	juni	6	4	Week	Thursday	68	-4,39792130660727	0	Control	Control
33	primary	new	301	Control	4006	1	10	0	7	2018-06-24	4	1	8652	37	observed	14,7	0,7	0	-0,0256805181183002	4,9	0,563993989782798	5	6	4	3	6	1	1	6	6	6	100	6	Female	-1,49406087602079	T3	2,52047141796585	-5,83789903489235	-0,893615441722346	juni	6	0	Weekend	Sunday	78	5,60207869339273	0	Control	Control
33	primary	new	301	Control	4007	0	9	0	5	2018-03-08	1	1	10195	31	observed	4,8	2	3,2	1,43032502356024	4,9	0,563993989782798	7	6	2	6	5,67	2	1	5	6	5,5	83	5,15	Male	-2,49406087602079	T1	-7,37952858203415	-4,53789903489235	2,30638455827765	maart	3	4	Week	Thursday	84	11,6020786933927	0	Control	Control
33	primary	new	301	Control	4007	0	9	0	5	2018-03-09	2	1	17056	82	observed	6,5	5,8	5,1	1,43032502356024	4,9	0,563993989782798	7	6	2	6	5,67	2	1	5	6	5,5	83	5,15	Male	-2,49406087602079	T1	-5,67952858203415	-0,737899034892354	4,20638455827765	maart	3	5	Week	Friday	82	9,60207869339273	0	Control	Control
33	primary	new	301	Control	4007	0	9	0	5	2018-03-12	5	1	9541	40	observed	10,3	2,6	1,8	1,43032502356024	4,9	0,563993989782798	7	6	2	6	5,67	2	1	5	6	5,5	83	5,15	Male	-2,49406087602079	T1	-1,87952858203415	-3,93789903489235	0,906384558277654	maart	3	1	Week	Monday	85	12,6020786933927	0	Control	Control
33	primary	new	301	Control	4007	0	9	0	5	2018-03-10	3	1	19753	109	observed	11,4	1,8	6,6	1,43032502356024	4,9	0,563993989782798	7	6	2	6	5,67	2	1	5	6	5,5	83	5,15	Male	-2,49406087602079	T1	-0,77952858203415	-4,73789903489235	5,70638455827765	maart	3	6	Weekend	Saturday	89	16,6020786933927	0	Control	Control
33	primary	new	301	Control	4007	0	9	0	5	2018-03-11	4	1	15478	106	observed	10,2	2,5	1	1,43032502356024	4,9	0,563993989782798	7	6	2	6	5,67	2	1	5	6	5,5	83	5,15	Male	-2,49406087602079	T1	-1,97952858203415	-4,03789903489235	0,106384558277654	maart	3	0	Weekend	Sunday	91	18,6020786933927	0	Control	Control
33	primary	new	301	Control	4007	0	10	0	6	2018-05-25	2	1	14792	57	observed	20,6	10,5	0	1,43032502356024	4,9	0,563993989782798	4	1	4	6	6	1,33	2	6	6	6	100	6	Male	-1,49406087602079	T2	8,42047141796585	3,96210096510765	-0,893615441722346	mei	5	5	Week	Friday	73	0,602078693392727	0	Control	Control
33	primary	new	301	Control	4007	0	10	0	6	2018-05-24	1	1	14752	70	observed	18,3	3,1	0,7	1,43032502356024	4,9	0,563993989782798	4	1	4	6	6	1,33	2	6	6	6	100	6	Male	-1,49406087602079	T2	6,12047141796585	-3,43789903489235	-0,193615441722346	mei	5	4	Week	Thursday	69	-3,39792130660727	0	Control	Control
33	primary	new	301	Control	4007	0	10	0	6	2018-05-27	4	1	19302	190	observed	20,3	3,1	1,9	1,43032502356024	4,9	0,563993989782798	4	1	4	6	6	1,33	2	6	6	6	100	6	Male	-1,49406087602079	T2	8,12047141796585	-3,43789903489235	1,00638455827765	mei	5	0	Weekend	Sunday	71	-1,39792130660727	0	Control	Control
33	primary	new	301	Control	4007	0	10	0	6	2018-05-26	3	1	2247	0	observed	23	11,9	0	1,43032502356024	4,9	0,563993989782798	4	1	4	6	6	1,33	2	6	6	6	100	6	Male	-1,49406087602079	T2	10,8204714179658	5,36210096510765	-0,893615441722346	mei	5	6	Weekend	Saturday	59	-13,3979213066073	0	Control	Control
33	primary	new	301	Control	4007	0	10	0	7	2018-06-21	1	0	19430	12	imputed	14,4	8,1	0	1,43032502356024	4,9	0,563993989782798	NA	NA	NA	NA	NA	NA	NA	NA	NA	NA	NA	NA	Male	-1,49406087602079	T3	2,22047141796585	1,56210096510765	-0,893615441722346	juni	6	4	Week	Thursday	68	-4,39792130660727	0	Control	Control
33	primary	new	301	Control	4021	1	9	0	5	2018-03-10	3	1	1400	0	observed	11,4	1,8	6,6	-0,110210913369631	4	-0,336006010217202	2	1	1	3,5	5,67	2	1	1	2	1,5	70	4,5	Female	-2,49406087602079	T1	-0,77952858203415	-4,73789903489235	5,70638455827765	maart	3	6	Weekend	Saturday	89	16,6020786933927	0	Control	Control
33	primary	new	301	Control	4021	1	9	0	5	2018-03-09	2	1	1210	0	observed	6,5	5,8	5,1	-0,110210913369631	4	-0,336006010217202	2	1	1	3,5	5,67	2	1	1	2	1,5	70	4,5	Female	-2,49406087602079	T1	-5,67952858203415	-0,737899034892354	4,20638455827765	maart	3	5	Week	Friday	82	9,60207869339273	0	Control	Control
33	primary	new	301	Control	4021	1	9	0	5	2018-03-11	4	1	1010	0	observed	10,2	2,5	1	-0,110210913369631	4	-0,336006010217202	2	1	1	3,5	5,67	2	1	1	2	1,5	70	4,5	Female	-2,49406087602079	T1	-1,97952858203415	-4,03789903489235	0,106384558277654	maart	3	0	Weekend	Sunday	91	18,6020786933927	0	Control	Control
33	primary	new	301	Control	4021	1	9	0	5	2018-03-08	1	1	1290	0	observed	4,8	2	3,2	-0,110210913369631	4	-0,336006010217202	2	1	1	3,5	5,67	2	1	1	2	1,5	70	4,5	Female	-2,49406087602079	T1	-7,37952858203415	-4,53789903489235	2,30638455827765	maart	3	4	Week	Thursday	84	11,6020786933927	0	Control	Control
33	primary	new	301	Control	4010	0	9	0	5	2018-03-08	1	1	8826	18	observed	4,8	2	3,2	0,771013309252592	2,6	-1,7360060102172	0	0	2	5	5,33	1,33	1,33	2	5	3,5	75	4,75	Male	-2,49406087602079	T1	-7,37952858203415	-4,53789903489235	2,30638455827765	maart	3	4	Week	Thursday	84	11,6020786933927	0	Control	Control
33	primary	new	301	Control	4010	0	9	0	6	2018-05-25	2	1	13339	76	observed	20,6	10,5	0	0,771013309252592	2,6	-1,7360060102172	2	2	0	6	6	1	1	4	6	5	100	6	Male	-2,49406087602079	T2	8,42047141796585	3,96210096510765	-0,893615441722346	mei	5	5	Week	Friday	73	0,602078693392727	0	Control	Control
33	primary	new	301	Control	4010	0	9	0	6	2018-05-27	4	1	9395	41	observed	20,3	3,1	1,9	0,771013309252592	2,6	-1,7360060102172	2	2	0	6	6	1	1	4	6	5	100	6	Male	-2,49406087602079	T2	8,12047141796585	-3,43789903489235	1,00638455827765	mei	5	0	Weekend	Sunday	71	-1,39792130660727	0	Control	Control
33	primary	new	301	Control	4010	0	9	0	6	2018-05-26	3	1	18881	98	observed	23	11,9	0	0,771013309252592	2,6	-1,7360060102172	2	2	0	6	6	1	1	4	6	5	100	6	Male	-2,49406087602079	T2	10,8204714179658	5,36210096510765	-0,893615441722346	mei	5	6	Weekend	Saturday	59	-13,3979213066073	0	Control	Control
33	primary	new	301	Control	4010	0	9	0	6	2018-05-28	5	1	15092	76	observed	22,5	11,6	0,3	0,771013309252592	2,6	-1,7360060102172	2	2	0	6	6	1	1	4	6	5	100	6	Male	-2,49406087602079	T2	10,3204714179658	5,06210096510765	-0,593615441722346	mei	5	1	Week	Monday	69	-3,39792130660727	0	Control	Control
33	primary	new	301	Control	4010	0	9	0	6	2018-05-24	1	1	9333	21	observed	18,3	3,1	0,7	0,771013309252592	2,6	-1,7360060102172	2	2	0	6	6	1	1	4	6	5	100	6	Male	-2,49406087602079	T2	6,12047141796585	-3,43789903489235	-0,193615441722346	mei	5	4	Week	Thursday	69	-3,39792130660727	0	Control	Control
33	primary	new	301	Control	4010	0	9	0	7	2018-06-22	2	1	6474	44	observed	13,3	1,5	0	0,771013309252592	2,6	-1,7360060102172	NA	NA	NA	NA	NA	NA	NA	NA	NA	NA	100	6	Male	-2,49406087602079	T3	1,12047141796585	-5,03789903489235	-0,893615441722346	juni	6	5	Week	Friday	68	-4,39792130660727	0	Control	Control
33	primary	new	301	Control	4010	0	9	0	7	2018-06-21	1	1	11253	45	observed	14,4	8,1	0	0,771013309252592	2,6	-1,7360060102172	NA	NA	NA	NA	NA	NA	NA	NA	NA	NA	100	6	Male	-2,49406087602079	T3	2,22047141796585	1,56210096510765	-0,893615441722346	juni	6	4	Week	Thursday	68	-4,39792130660727	0	Control	Control
33	primary	new	301	Control	4010	0	9	0	7	2018-06-23	3	1	17979	81	imputed	15,1	4,9	0	0,771013309252592	2,6	-1,7360060102172	NA	NA	NA	NA	NA	NA	NA	NA	NA	NA	100	6	Male	-2,49406087602079	T3	2,92047141796585	-1,63789903489235	-0,893615441722346	juni	6	6	Weekend	Saturday	71	-1,39792130660727	0	Control	Control
33	primary	new	301	Control	4011	0	9	0	5	2018-03-09	2	1	8395	52	observed	6,5	5,8	5,1	2,76658655383061	3,3	-1,0360060102172	0	3	2	5,5	5,67	1	1	6	4	5	59	3,95	Male	-2,49406087602079	T1	-5,67952858203415	-0,737899034892354	4,20638455827765	maart	3	5	Week	Friday	82	9,60207869339273	0	Control	Control
33	primary	new	301	Control	4011	0	9	0	5	2018-03-08	1	1	11296	50	observed	4,8	2	3,2	2,76658655383061	3,3	-1,0360060102172	0	3	2	5,5	5,67	1	1	6	4	5	59	3,95	Male	-2,49406087602079	T1	-7,37952858203415	-4,53789903489235	2,30638455827765	maart	3	4	Week	Thursday	84	11,6020786933927	0	Control	Control
33	primary	new	301	Control	4011	0	9	0	5	2018-03-10	3	1	1000	18	imputed	11,4	1,8	6,6	2,76658655383061	3,3	-1,0360060102172	0	3	2	5,5	5,67	1	1	6	4	5	59	3,95	Male	-2,49406087602079	T1	-0,77952858203415	-4,73789903489235	5,70638455827765	maart	3	6	Weekend	Saturday	89	16,6020786933927	0	Control	Control
33	primary	new	301	Control	4011	0	9	0	6	2018-05-26	3	1	3463	5	observed	23	11,9	0	2,76658655383061	3,3	-1,0360060102172	4	5	4	5,5	3,33	5,67	2	5	2	3,5	61	4,05	Male	-2,49406087602079	T2	10,8204714179658	5,36210096510765	-0,893615441722346	mei	5	6	Weekend	Saturday	59	-13,3979213066073	0	Control	Control
33	primary	new	301	Control	4011	0	9	0	6	2018-05-24	1	1	13541	59	observed	18,3	3,1	0,7	2,76658655383061	3,3	-1,0360060102172	4	5	4	5,5	3,33	5,67	2	5	2	3,5	61	4,05	Male	-2,49406087602079	T2	6,12047141796585	-3,43789903489235	-0,193615441722346	mei	5	4	Week	Thursday	69	-3,39792130660727	0	Control	Control
33	primary	new	301	Control	4023	0	10	0	6	2018-05-24	1	1	12324	32	observed	18,3	3,1	0,7	-0,289591306817335	5,6	1,2639939897828	NA	NA	NA	NA	NA	NA	NA	NA	NA	NA	100	6	Male	-1,49406087602079	T2	6,12047141796585	-3,43789903489235	-0,193615441722346	mei	5	4	Week	Thursday	69	-3,39792130660727	0	Control	Control
33	primary	new	301	Control	4023	0	10	0	6	2018-05-27	4	1	16500	82	observed	20,3	3,1	1,9	-0,289591306817335	5,6	1,2639939897828	NA	NA	NA	NA	NA	NA	NA	NA	NA	NA	100	6	Male	-1,49406087602079	T2	8,12047141796585	-3,43789903489235	1,00638455827765	mei	5	0	Weekend	Sunday	71	-1,39792130660727	0	Control	Control
33	primary	new	301	Control	4023	0	10	0	6	2018-05-26	3	1	16207	131	imputed	23	11,9	0	-0,289591306817335	5,6	1,2639939897828	NA	NA	NA	NA	NA	NA	NA	NA	NA	NA	100	6	Male	-1,49406087602079	T2	10,8204714179658	5,36210096510765	-0,893615441722346	mei	5	6	Weekend	Saturday	59	-13,3979213066073	0	Control	Control
33	primary	new	301	Control	4023	0	10	0	6	2018-05-28	5	1	20047	150	observed	22,5	11,6	0,3	-0,289591306817335	5,6	1,2639939897828	NA	NA	NA	NA	NA	NA	NA	NA	NA	NA	100	6	Male	-1,49406087602079	T2	10,3204714179658	5,06210096510765	-0,593615441722346	mei	5	1	Week	Monday	69	-3,39792130660727	0	Control	Control
33	primary	new	301	Control	4023	0	10	0	7	2018-06-24	4	1	7951	31	observed	14,7	0,7	0	-0,289591306817335	5,6	1,2639939897828	7	5	0	3,5	6	1	1	5	3	4	100	6	Male	-1,49406087602079	T3	2,52047141796585	-5,83789903489235	-0,893615441722346	juni	6	0	Weekend	Sunday	78	5,60207869339273	0	Control	Control
33	primary	new	301	Control	4023	0	10	0	7	2018-06-21	1	1	15880	108	observed	14,4	8,1	0	-0,289591306817335	5,6	1,2639939897828	7	5	0	3,5	6	1	1	5	3	4	100	6	Male	-1,49406087602079	T3	2,22047141796585	1,56210096510765	-0,893615441722346	juni	6	4	Week	Thursday	68	-4,39792130660727	0	Control	Control
33	primary	new	301	Control	4023	0	10	0	7	2018-06-22	2	1	16029	77	observed	13,3	1,5	0	-0,289591306817335	5,6	1,2639939897828	7	5	0	3,5	6	1	1	5	3	4	100	6	Male	-1,49406087602079	T3	1,12047141796585	-5,03789903489235	-0,893615441722346	juni	6	5	Week	Friday	68	-4,39792130660727	0	Control	Control
33	primary	new	301	Control	4023	0	10	0	7	2018-06-25	5	1	12576	20	observed	16,5	9,6	0	-0,289591306817335	5,6	1,2639939897828	7	5	0	3,5	6	1	1	5	3	4	100	6	Male	-1,49406087602079	T3	4,32047141796585	3,06210096510765	-0,893615441722346	juni	6	1	Week	Monday	75	2,60207869339273	0	Control	Control
33	primary	new	301	Control	4023	0	10	0	7	2018-06-23	3	1	10687	77	observed	15,1	4,9	0	-0,289591306817335	5,6	1,2639939897828	7	5	0	3,5	6	1	1	5	3	4	100	6	Male	-1,49406087602079	T3	2,92047141796585	-1,63789903489235	-0,893615441722346	juni	6	6	Weekend	Saturday	71	-1,39792130660727	0	Control	Control
33	primary	new	301	Control	4024	1	9	0	5	2018-03-09	2	1	8845	18	observed	6,5	5,8	5,1	0,588462865225535	2,95	-1,3860060102172	7	3	1	4,5	5,67	1,33	1	5	5	5	91	5,55	Female	-2,49406087602079	T1	-5,67952858203415	-0,737899034892354	4,20638455827765	maart	3	5	Week	Friday	82	9,60207869339273	0	Control	Control
33	primary	new	301	Control	4024	1	9	0	5	2018-03-12	5	1	7112	31	observed	10,3	2,6	1,8	0,588462865225535	2,95	-1,3860060102172	7	3	1	4,5	5,67	1,33	1	5	5	5	91	5,55	Female	-2,49406087602079	T1	-1,87952858203415	-3,93789903489235	0,906384558277654	maart	3	1	Week	Monday	85	12,6020786933927	0	Control	Control
33	primary	new	301	Control	4024	1	9	0	5	2018-03-11	4	1	7567	10	observed	10,2	2,5	1	0,588462865225535	2,95	-1,3860060102172	7	3	1	4,5	5,67	1,33	1	5	5	5	91	5,55	Female	-2,49406087602079	T1	-1,97952858203415	-4,03789903489235	0,106384558277654	maart	3	0	Weekend	Sunday	91	18,6020786933927	0	Control	Control
33	primary	new	301	Control	4024	1	9	0	5	2018-03-08	1	1	9047	25	observed	4,8	2	3,2	0,588462865225535	2,95	-1,3860060102172	7	3	1	4,5	5,67	1,33	1	5	5	5	91	5,55	Female	-2,49406087602079	T1	-7,37952858203415	-4,53789903489235	2,30638455827765	maart	3	4	Week	Thursday	84	11,6020786933927	0	Control	Control
33	primary	new	301	Control	4024	1	9	0	5	2018-03-10	3	1	5252	0	observed	11,4	1,8	6,6	0,588462865225535	2,95	-1,3860060102172	7	3	1	4,5	5,67	1,33	1	5	5	5	91	5,55	Female	-2,49406087602079	T1	-0,77952858203415	-4,73789903489235	5,70638455827765	maart	3	6	Weekend	Saturday	89	16,6020786933927	0	Control	Control
33	primary	new	301	Control	4024	1	9	0	6	2018-05-26	3	1	6176	0	observed	23	11,9	0	0,588462865225535	2,95	-1,3860060102172	5	3	4	4,5	3,67	3	4	6	6	6	49	3,45	Female	-2,49406087602079	T2	10,8204714179658	5,36210096510765	-0,893615441722346	mei	5	6	Weekend	Saturday	59	-13,3979213066073	0	Control	Control
33	primary	new	301	Control	4024	1	9	0	6	2018-05-24	1	1	9921	8	observed	18,3	3,1	0,7	0,588462865225535	2,95	-1,3860060102172	5	3	4	4,5	3,67	3	4	6	6	6	49	3,45	Female	-2,49406087602079	T2	6,12047141796585	-3,43789903489235	-0,193615441722346	mei	5	4	Week	Thursday	69	-3,39792130660727	0	Control	Control
33	primary	new	301	Control	4024	1	9	0	6	2018-05-25	2	1	10433	41	observed	20,6	10,5	0	0,588462865225535	2,95	-1,3860060102172	5	3	4	4,5	3,67	3	4	6	6	6	49	3,45	Female	-2,49406087602079	T2	8,42047141796585	3,96210096510765	-0,893615441722346	mei	5	5	Week	Friday	73	0,602078693392727	0	Control	Control
33	primary	new	301	Control	4024	1	9	0	6	2018-05-27	4	1	4170	0	observed	20,3	3,1	1,9	0,588462865225535	2,95	-1,3860060102172	5	3	4	4,5	3,67	3	4	6	6	6	49	3,45	Female	-2,49406087602079	T2	8,12047141796585	-3,43789903489235	1,00638455827765	mei	5	0	Weekend	Sunday	71	-1,39792130660727	0	Control	Control
33	primary	new	301	Control	4024	1	9	0	6	2018-05-28	5	1	8283	10	observed	22,5	11,6	0,3	0,588462865225535	2,95	-1,3860060102172	5	3	4	4,5	3,67	3	4	6	6	6	49	3,45	Female	-2,49406087602079	T2	10,3204714179658	5,06210096510765	-0,593615441722346	mei	5	1	Week	Monday	69	-3,39792130660727	0	Control	Control
33	primary	new	301	Control	4024	1	10	0	7	2018-06-21	1	1	6674	31	observed	14,4	8,1	0	0,588462865225535	2,95	-1,3860060102172	2	1	2	3,5	3	3,67	2,67	4	3	3,5	0	1	Female	-1,49406087602079	T3	2,22047141796585	1,56210096510765	-0,893615441722346	juni	6	4	Week	Thursday	68	-4,39792130660727	0	Control	Control
33	primary	new	301	Control	4024	1	10	0	7	2018-06-22	2	1	11620	69	observed	13,3	1,5	0	0,588462865225535	2,95	-1,3860060102172	2	1	2	3,5	3	3,67	2,67	4	3	3,5	0	1	Female	-1,49406087602079	T3	1,12047141796585	-5,03789903489235	-0,893615441722346	juni	6	5	Week	Friday	68	-4,39792130660727	0	Control	Control
33	primary	new	301	Control	4024	1	10	0	7	2018-06-24	4	1	9441	31	observed	14,7	0,7	0	0,588462865225535	2,95	-1,3860060102172	2	1	2	3,5	3	3,67	2,67	4	3	3,5	0	1	Female	-1,49406087602079	T3	2,52047141796585	-5,83789903489235	-0,893615441722346	juni	6	0	Weekend	Sunday	78	5,60207869339273	0	Control	Control
33	primary	new	301	Control	4024	1	10	0	7	2018-06-23	3	1	6553	12	observed	15,1	4,9	0	0,588462865225535	2,95	-1,3860060102172	2	1	2	3,5	3	3,67	2,67	4	3	3,5	0	1	Female	-1,49406087602079	T3	2,92047141796585	-1,63789903489235	-0,893615441722346	juni	6	6	Weekend	Saturday	71	-1,39792130660727	0	Control	Control
33	primary	new	301	Control	4025	0	9	0	5	2018-03-11	4	1	6150	17	observed	10,2	2,5	1	-0,585535873208819	4,3	-0,0360060102172026	2	2	3	6	5,67	2,67	1,33	4	5	4,5	38	2,9	Male	-2,49406087602079	T1	-1,97952858203415	-4,03789903489235	0,106384558277654	maart	3	0	Weekend	Sunday	91	18,6020786933927	0	Control	Control
33	primary	new	301	Control	4025	0	9	0	5	2018-03-10	3	1	21883	230	observed	11,4	1,8	6,6	-0,585535873208819	4,3	-0,0360060102172026	2	2	3	6	5,67	2,67	1,33	4	5	4,5	38	2,9	Male	-2,49406087602079	T1	-0,77952858203415	-4,73789903489235	5,70638455827765	maart	3	6	Weekend	Saturday	89	16,6020786933927	0	Control	Control
33	primary	new	301	Control	4025	0	9	0	5	2018-03-12	5	1	8554	40	observed	10,3	2,6	1,8	-0,585535873208819	4,3	-0,0360060102172026	2	2	3	6	5,67	2,67	1,33	4	5	4,5	38	2,9	Male	-2,49406087602079	T1	-1,87952858203415	-3,93789903489235	0,906384558277654	maart	3	1	Week	Monday	85	12,6020786933927	0	Control	Control
33	primary	new	301	Control	4025	0	9	0	5	2018-03-09	2	1	15961	93	observed	6,5	5,8	5,1	-0,585535873208819	4,3	-0,0360060102172026	2	2	3	6	5,67	2,67	1,33	4	5	4,5	38	2,9	Male	-2,49406087602079	T1	-5,67952858203415	-0,737899034892354	4,20638455827765	maart	3	5	Week	Friday	82	9,60207869339273	0	Control	Control
33	primary	new	301	Control	4025	0	9	0	5	2018-03-08	1	1	9713	68	observed	4,8	2	3,2	-0,585535873208819	4,3	-0,0360060102172026	2	2	3	6	5,67	2,67	1,33	4	5	4,5	38	2,9	Male	-2,49406087602079	T1	-7,37952858203415	-4,53789903489235	2,30638455827765	maart	3	4	Week	Thursday	84	11,6020786933927	0	Control	Control
33	primary	new	301	Control	4013	1	9	0	5	2018-03-08	1	1	12687	62	observed	4,8	2	3,2	-1,01268116956191	4,65	0,313993989782798	2	2	0	5,5	6	1	1	5	6	5,5	100	6	Female	-2,49406087602079	T1	-7,37952858203415	-4,53789903489235	2,30638455827765	maart	3	4	Week	Thursday	84	11,6020786933927	0	Control	Control
33	primary	new	301	Control	4013	1	9	0	5	2018-03-12	5	1	10494	51	observed	10,3	2,6	1,8	-1,01268116956191	4,65	0,313993989782798	2	2	0	5,5	6	1	1	5	6	5,5	100	6	Female	-2,49406087602079	T1	-1,87952858203415	-3,93789903489235	0,906384558277654	maart	3	1	Week	Monday	85	12,6020786933927	0	Control	Control
33	primary	new	301	Control	4013	1	9	0	5	2018-03-09	2	1	14805	62	observed	6,5	5,8	5,1	-1,01268116956191	4,65	0,313993989782798	2	2	0	5,5	6	1	1	5	6	5,5	100	6	Female	-2,49406087602079	T1	-5,67952858203415	-0,737899034892354	4,20638455827765	maart	3	5	Week	Friday	82	9,60207869339273	0	Control	Control
33	primary	new	301	Control	4013	1	9	0	6	2018-05-25	2	1	10391	37	observed	20,6	10,5	0	-1,01268116956191	4,65	0,313993989782798	1	1	0	2,5	5,67	1	1	2	6	4	100	6	Female	-2,49406087602079	T2	8,42047141796585	3,96210096510765	-0,893615441722346	mei	5	5	Week	Friday	73	0,602078693392727	0	Control	Control
33	primary	new	301	Control	4013	1	9	0	6	2018-05-26	3	1	5469	8	observed	23	11,9	0	-1,01268116956191	4,65	0,313993989782798	1	1	0	2,5	5,67	1	1	2	6	4	100	6	Female	-2,49406087602079	T2	10,8204714179658	5,36210096510765	-0,893615441722346	mei	5	6	Weekend	Saturday	59	-13,3979213066073	0	Control	Control
33	primary	new	301	Control	4013	1	9	0	6	2018-05-24	1	1	13224	47	observed	18,3	3,1	0,7	-1,01268116956191	4,65	0,313993989782798	1	1	0	2,5	5,67	1	1	2	6	4	100	6	Female	-2,49406087602079	T2	6,12047141796585	-3,43789903489235	-0,193615441722346	mei	5	4	Week	Thursday	69	-3,39792130660727	0	Control	Control
33	primary	new	301	Control	4013	1	9	0	6	2018-05-28	5	1	18225	120	observed	22,5	11,6	0,3	-1,01268116956191	4,65	0,313993989782798	1	1	0	2,5	5,67	1	1	2	6	4	100	6	Female	-2,49406087602079	T2	10,3204714179658	5,06210096510765	-0,593615441722346	mei	5	1	Week	Monday	69	-3,39792130660727	0	Control	Control
33	primary	new	301	Control	4013	1	9	0	6	2018-05-27	4	1	6732	0	observed	20,3	3,1	1,9	-1,01268116956191	4,65	0,313993989782798	1	1	0	2,5	5,67	1	1	2	6	4	100	6	Female	-2,49406087602079	T2	8,12047141796585	-3,43789903489235	1,00638455827765	mei	5	0	Weekend	Sunday	71	-1,39792130660727	0	Control	Control
33	primary	new	301	Control	4013	1	9	0	7	2018-06-21	1	1	10374	17	observed	14,4	8,1	0	-1,01268116956191	4,65	0,313993989782798	3	4	3	1	6	1	1	1	6	3,5	100	6	Female	-2,49406087602079	T3	2,22047141796585	1,56210096510765	-0,893615441722346	juni	6	4	Week	Thursday	68	-4,39792130660727	0	Control	Control
33	primary	new	301	Control	4013	1	9	0	7	2018-06-25	5	1	9981	47	observed	16,5	9,6	0	-1,01268116956191	4,65	0,313993989782798	3	4	3	1	6	1	1	1	6	3,5	100	6	Female	-2,49406087602079	T3	4,32047141796585	3,06210096510765	-0,893615441722346	juni	6	1	Week	Monday	75	2,60207869339273	0	Control	Control
33	primary	new	301	Control	4013	1	9	0	7	2018-06-24	4	1	13741	104	observed	14,7	0,7	0	-1,01268116956191	4,65	0,313993989782798	3	4	3	1	6	1	1	1	6	3,5	100	6	Female	-2,49406087602079	T3	2,52047141796585	-5,83789903489235	-0,893615441722346	juni	6	0	Weekend	Sunday	78	5,60207869339273	0	Control	Control
33	primary	new	301	Control	4013	1	9	0	7	2018-06-22	2	1	7067	7	observed	13,3	1,5	0	-1,01268116956191	4,65	0,313993989782798	3	4	3	1	6	1	1	1	6	3,5	100	6	Female	-2,49406087602079	T3	1,12047141796585	-5,03789903489235	-0,893615441722346	juni	6	5	Week	Friday	68	-4,39792130660727	0	Control	Control
33	primary	new	301	Control	4013	1	9	0	7	2018-06-23	3	1	14272	60	observed	15,1	4,9	0	-1,01268116956191	4,65	0,313993989782798	3	4	3	1	6	1	1	1	6	3,5	100	6	Female	-2,49406087602079	T3	2,92047141796585	-1,63789903489235	-0,893615441722346	juni	6	6	Weekend	Saturday	71	-1,39792130660727	0	Control	Control
33	primary	new	301	Control	4015	0	10	0	5	2018-03-09	2	1	6445	34	observed	6,5	5,8	5,1	2,76664750724858	5,3	0,963993989782797	6	5	3	4	4	4	4	6	6	6	49	3,45	Male	-1,49406087602079	T1	-5,67952858203415	-0,737899034892354	4,20638455827765	maart	3	5	Week	Friday	82	9,60207869339273	0	Control	Control
33	primary	new	301	Control	4015	0	10	0	5	2018-03-10	3	1	9238	22	imputed	11,4	1,8	6,6	2,76664750724858	5,3	0,963993989782797	6	5	3	4	4	4	4	6	6	6	49	3,45	Male	-1,49406087602079	T1	-0,77952858203415	-4,73789903489235	5,70638455827765	maart	3	6	Weekend	Saturday	89	16,6020786933927	0	Control	Control
33	primary	new	301	Control	4015	0	10	0	5	2018-03-08	1	1	5617	25	observed	4,8	2	3,2	2,76664750724858	5,3	0,963993989782797	6	5	3	4	4	4	4	6	6	6	49	3,45	Male	-1,49406087602079	T1	-7,37952858203415	-4,53789903489235	2,30638455827765	maart	3	4	Week	Thursday	84	11,6020786933927	0	Control	Control
33	primary	new	301	Control	4015	0	11	0	6	2018-05-25	2	1	7779	0	imputed	20,6	10,5	0	2,76664750724858	5,3	0,963993989782797	NA	NA	NA	NA	NA	NA	NA	6	6	6	100	6	Male	-0,494060876020788	T2	8,42047141796585	3,96210096510765	-0,893615441722346	mei	5	5	Week	Friday	73	0,602078693392727	0	Control	Control
33	primary	new	301	Control	4015	0	11	0	6	2018-05-24	1	1	6015	6	observed	18,3	3,1	0,7	2,76664750724858	5,3	0,963993989782797	NA	NA	NA	NA	NA	NA	NA	6	6	6	100	6	Male	-0,494060876020788	T2	6,12047141796585	-3,43789903489235	-0,193615441722346	mei	5	4	Week	Thursday	69	-3,39792130660727	0	Control	Control
33	primary	new	301	Control	4015	0	11	0	6	2018-05-26	3	1	5394	25	imputed	23	11,9	0	2,76664750724858	5,3	0,963993989782797	NA	NA	NA	NA	NA	NA	NA	6	6	6	100	6	Male	-0,494060876020788	T2	10,8204714179658	5,36210096510765	-0,893615441722346	mei	5	6	Weekend	Saturday	59	-13,3979213066073	0	Control	Control
33	primary	new	301	Control	4015	0	11	0	7	2018-06-22	2	1	5045	0	imputed	13,3	1,5	0	2,76664750724858	5,3	0,963993989782797	NA	NA	NA	NA	NA	NA	NA	NA	NA	NA	NA	NA	Male	-0,494060876020788	T3	1,12047141796585	-5,03789903489235	-0,893615441722346	juni	6	5	Week	Friday	68	-4,39792130660727	0	Control	Control
33	primary	new	301	Control	4015	0	11	0	7	2018-06-23	3	1	1000	0	imputed	15,1	4,9	0	2,76664750724858	5,3	0,963993989782797	NA	NA	NA	NA	NA	NA	NA	NA	NA	NA	NA	NA	Male	-0,494060876020788	T3	2,92047141796585	-1,63789903489235	-0,893615441722346	juni	6	6	Weekend	Saturday	71	-1,39792130660727	0	Control	Control
33	primary	new	301	Control	4015	0	11	0	7	2018-06-21	1	1	14522	30	imputed	14,4	8,1	0	2,76664750724858	5,3	0,963993989782797	NA	NA	NA	NA	NA	NA	NA	NA	NA	NA	NA	NA	Male	-0,494060876020788	T3	2,22047141796585	1,56210096510765	-0,893615441722346	juni	6	4	Week	Thursday	68	-4,39792130660727	0	Control	Control
33	primary	new	301	Control	4016	0	10	0	5	2018-03-10	3	1	10755	13	observed	11,4	1,8	6,6	-0,169967813552548	5,5	1,1639939897828	7	2	4	5,5	5,67	2,67	1,67	6	1	3,5	100	6	Male	-1,49406087602079	T1	-0,77952858203415	-4,73789903489235	5,70638455827765	maart	3	6	Weekend	Saturday	89	16,6020786933927	0	Control	Control
33	primary	new	301	Control	4016	0	10	0	5	2018-03-08	1	1	10813	31	observed	4,8	2	3,2	-0,169967813552548	5,5	1,1639939897828	7	2	4	5,5	5,67	2,67	1,67	6	1	3,5	100	6	Male	-1,49406087602079	T1	-7,37952858203415	-4,53789903489235	2,30638455827765	maart	3	4	Week	Thursday	84	11,6020786933927	0	Control	Control
33	primary	new	301	Control	4016	0	10	0	5	2018-03-11	4	1	7249	0	observed	10,2	2,5	1	-0,169967813552548	5,5	1,1639939897828	7	2	4	5,5	5,67	2,67	1,67	6	1	3,5	100	6	Male	-1,49406087602079	T1	-1,97952858203415	-4,03789903489235	0,106384558277654	maart	3	0	Weekend	Sunday	91	18,6020786933927	0	Control	Control
33	primary	new	301	Control	4016	0	10	0	5	2018-03-09	2	1	14852	70	observed	6,5	5,8	5,1	-0,169967813552548	5,5	1,1639939897828	7	2	4	5,5	5,67	2,67	1,67	6	1	3,5	100	6	Male	-1,49406087602079	T1	-5,67952858203415	-0,737899034892354	4,20638455827765	maart	3	5	Week	Friday	82	9,60207869339273	0	Control	Control
33	primary	new	301	Control	4016	0	10	0	5	2018-03-12	5	1	19964	140	observed	10,3	2,6	1,8	-0,169967813552548	5,5	1,1639939897828	7	2	4	5,5	5,67	2,67	1,67	6	1	3,5	100	6	Male	-1,49406087602079	T1	-1,87952858203415	-3,93789903489235	0,906384558277654	maart	3	1	Week	Monday	85	12,6020786933927	0	Control	Control
33	primary	new	301	Control	4016	0	10	0	6	2018-05-25	2	1	15737	106	observed	20,6	10,5	0	-0,169967813552548	5,5	1,1639939897828	7	3	5	3,5	6	1	1	6	6	6	100	6	Male	-1,49406087602079	T2	8,42047141796585	3,96210096510765	-0,893615441722346	mei	5	5	Week	Friday	73	0,602078693392727	0	Control	Control
33	primary	new	301	Control	4016	0	10	0	6	2018-05-27	4	1	5157	0	observed	20,3	3,1	1,9	-0,169967813552548	5,5	1,1639939897828	7	3	5	3,5	6	1	1	6	6	6	100	6	Male	-1,49406087602079	T2	8,12047141796585	-3,43789903489235	1,00638455827765	mei	5	0	Weekend	Sunday	71	-1,39792130660727	0	Control	Control
33	primary	new	301	Control	4016	0	10	0	6	2018-05-26	3	1	4363	8	observed	23	11,9	0	-0,169967813552548	5,5	1,1639939897828	7	3	5	3,5	6	1	1	6	6	6	100	6	Male	-1,49406087602079	T2	10,8204714179658	5,36210096510765	-0,893615441722346	mei	5	6	Weekend	Saturday	59	-13,3979213066073	0	Control	Control
33	primary	new	301	Control	4016	0	10	0	6	2018-05-24	1	1	13330	73	observed	18,3	3,1	0,7	-0,169967813552548	5,5	1,1639939897828	7	3	5	3,5	6	1	1	6	6	6	100	6	Male	-1,49406087602079	T2	6,12047141796585	-3,43789903489235	-0,193615441722346	mei	5	4	Week	Thursday	69	-3,39792130660727	0	Control	Control
33	primary	new	301	Control	4016	0	10	0	6	2018-05-28	5	1	4598	37	observed	22,5	11,6	0,3	-0,169967813552548	5,5	1,1639939897828	7	3	5	3,5	6	1	1	6	6	6	100	6	Male	-1,49406087602079	T2	10,3204714179658	5,06210096510765	-0,593615441722346	mei	5	1	Week	Monday	69	-3,39792130660727	0	Control	Control
33	primary	new	301	Control	4016	0	10	0	7	2018-06-24	4	1	16008	135	observed	14,7	0,7	0	-0,169967813552548	5,5	1,1639939897828	3	3	4	3,5	4,33	1	1	6	1	3,5	100	6	Male	-1,49406087602079	T3	2,52047141796585	-5,83789903489235	-0,893615441722346	juni	6	0	Weekend	Sunday	78	5,60207869339273	0	Control	Control
33	primary	new	301	Control	4016	0	10	0	7	2018-06-22	2	1	14818	74	observed	13,3	1,5	0	-0,169967813552548	5,5	1,1639939897828	3	3	4	3,5	4,33	1	1	6	1	3,5	100	6	Male	-1,49406087602079	T3	1,12047141796585	-5,03789903489235	-0,893615441722346	juni	6	5	Week	Friday	68	-4,39792130660727	0	Control	Control
33	primary	new	301	Control	4016	0	10	0	7	2018-06-23	3	1	13877	64	observed	15,1	4,9	0	-0,169967813552548	5,5	1,1639939897828	3	3	4	3,5	4,33	1	1	6	1	3,5	100	6	Male	-1,49406087602079	T3	2,92047141796585	-1,63789903489235	-0,893615441722346	juni	6	6	Weekend	Saturday	71	-1,39792130660727	0	Control	Control
33	primary	new	301	Control	4016	0	10	0	7	2018-06-21	1	1	15364	85	observed	14,4	8,1	0	-0,169967813552548	5,5	1,1639939897828	3	3	4	3,5	4,33	1	1	6	1	3,5	100	6	Male	-1,49406087602079	T3	2,22047141796585	1,56210096510765	-0,893615441722346	juni	6	4	Week	Thursday	68	-4,39792130660727	0	Control	Control
33	primary	new	301	Control	4017	0	9	0	5	2018-03-09	2	1	12513	33	observed	6,5	5,8	5,1	-0,132569337537533	5,2	0,863993989782798	4	3	6	6	5,67	3,67	1	6	6	6	100	6	Male	-2,49406087602079	T1	-5,67952858203415	-0,737899034892354	4,20638455827765	maart	3	5	Week	Friday	82	9,60207869339273	0	Control	Control
33	primary	new	301	Control	4017	0	9	0	5	2018-03-08	1	1	10727	32	observed	4,8	2	3,2	-0,132569337537533	5,2	0,863993989782798	4	3	6	6	5,67	3,67	1	6	6	6	100	6	Male	-2,49406087602079	T1	-7,37952858203415	-4,53789903489235	2,30638455827765	maart	3	4	Week	Thursday	84	11,6020786933927	0	Control	Control
33	primary	new	301	Control	4017	0	9	0	5	2018-03-10	3	1	11769	14	observed	11,4	1,8	6,6	-0,132569337537533	5,2	0,863993989782798	4	3	6	6	5,67	3,67	1	6	6	6	100	6	Male	-2,49406087602079	T1	-0,77952858203415	-4,73789903489235	5,70638455827765	maart	3	6	Weekend	Saturday	89	16,6020786933927	0	Control	Control
33	primary	new	301	Control	4017	0	9	0	5	2018-03-12	5	1	13931	71	observed	10,3	2,6	1,8	-0,132569337537533	5,2	0,863993989782798	4	3	6	6	5,67	3,67	1	6	6	6	100	6	Male	-2,49406087602079	T1	-1,87952858203415	-3,93789903489235	0,906384558277654	maart	3	1	Week	Monday	85	12,6020786933927	0	Control	Control
33	primary	new	301	Control	4017	0	9	0	5	2018-03-11	4	1	6704	10	observed	10,2	2,5	1	-0,132569337537533	5,2	0,863993989782798	4	3	6	6	5,67	3,67	1	6	6	6	100	6	Male	-2,49406087602079	T1	-1,97952858203415	-4,03789903489235	0,106384558277654	maart	3	0	Weekend	Sunday	91	18,6020786933927	0	Control	Control
33	primary	new	301	Control	4017	0	9	0	6	2018-05-25	2	1	13710	45	observed	20,6	10,5	0	-0,132569337537533	5,2	0,863993989782798	2	2	1	6	6	2,67	1	6	6	6	100	6	Male	-2,49406087602079	T2	8,42047141796585	3,96210096510765	-0,893615441722346	mei	5	5	Week	Friday	73	0,602078693392727	0	Control	Control
33	primary	new	301	Control	4005	1	9	0	6	2018-05-28	5	1	6451	11	observed	22,5	11,6	0,3	0,52331268535746	4,3	-0,0360060102172026	1	3	4	4	6	1	1	1	1	1	100	6	Female	-2,49406087602079	T2	10,3204714179658	5,06210096510765	-0,593615441722346	mei	5	1	Week	Monday	69	-3,39792130660727	0	Control	Control
33	primary	new	301	Control	4005	1	9	0	7	2018-06-21	1	1	11898	44	observed	14,4	8,1	0	0,52331268535746	4,3	-0,0360060102172026	1	0	0	3,5	6	1	1	1	1	1	100	6	Female	-2,49406087602079	T3	2,22047141796585	1,56210096510765	-0,893615441722346	juni	6	4	Week	Thursday	68	-4,39792130660727	0	Control	Control
33	primary	new	301	Control	4005	1	9	0	7	2018-06-23	3	1	7145	37	observed	15,1	4,9	0	0,52331268535746	4,3	-0,0360060102172026	1	0	0	3,5	6	1	1	1	1	1	100	6	Female	-2,49406087602079	T3	2,92047141796585	-1,63789903489235	-0,893615441722346	juni	6	6	Weekend	Saturday	71	-1,39792130660727	0	Control	Control
33	primary	new	301	Control	4005	1	9	0	7	2018-06-22	2	1	17442	88	observed	13,3	1,5	0	0,52331268535746	4,3	-0,0360060102172026	1	0	0	3,5	6	1	1	1	1	1	100	6	Female	-2,49406087602079	T3	1,12047141796585	-5,03789903489235	-0,893615441722346	juni	6	5	Week	Friday	68	-4,39792130660727	0	Control	Control
33	primary	new	301	Control	4005	1	9	0	7	2018-06-24	4	1	14011	8	observed	14,7	0,7	0	0,52331268535746	4,3	-0,0360060102172026	1	0	0	3,5	6	1	1	1	1	1	100	6	Female	-2,49406087602079	T3	2,52047141796585	-5,83789903489235	-0,893615441722346	juni	6	0	Weekend	Sunday	78	5,60207869339273	0	Control	Control
33	primary	new	301	Control	4005	1	9	0	7	2018-06-25	5	1	14494	48	observed	16,5	9,6	0	0,52331268535746	4,3	-0,0360060102172026	1	0	0	3,5	6	1	1	1	1	1	100	6	Female	-2,49406087602079	T3	4,32047141796585	3,06210096510765	-0,893615441722346	juni	6	1	Week	Monday	75	2,60207869339273	0	Control	Control
33	primary	new	301	Control	4006	1	10	0	5	2018-03-10	3	1	13024	97	imputed	11,4	1,8	6,6	-0,0256805181183002	4,9	0,563993989782798	NA	NA	NA	4	6	1	1	5	5	5	84	5,2	Female	-1,49406087602079	T1	-0,77952858203415	-4,73789903489235	5,70638455827765	maart	3	6	Weekend	Saturday	89	16,6020786933927	0	Control	Control
33	primary	new	301	Control	4006	1	10	0	5	2018-03-08	1	1	9288	32	observed	4,8	2	3,2	-0,0256805181183002	4,9	0,563993989782798	NA	NA	NA	4	6	1	1	5	5	5	84	5,2	Female	-1,49406087602079	T1	-7,37952858203415	-4,53789903489235	2,30638455827765	maart	3	4	Week	Thursday	84	11,6020786933927	0	Control	Control
33	primary	new	301	Control	4006	1	10	0	5	2018-03-09	2	1	10005	33	observed	6,5	5,8	5,1	-0,0256805181183002	4,9	0,563993989782798	NA	NA	NA	4	6	1	1	5	5	5	84	5,2	Female	-1,49406087602079	T1	-5,67952858203415	-0,737899034892354	4,20638455827765	maart	3	5	Week	Friday	82	9,60207869339273	0	Control	Control
33	primary	new	301	Control	4019	0	10	0	5	2018-03-10	3	1	13345	50	observed	11,4	1,8	6,6	0,22415154513302	4,7	0,363993989782798	2	1	1	5	5,67	1,67	1	3	6	4,5	100	6	Male	-1,49406087602079	T1	-0,77952858203415	-4,73789903489235	5,70638455827765	maart	3	6	Weekend	Saturday	89	16,6020786933927	0	Control	Control
33	primary	new	301	Control	4006	1	10	0	6	2018-05-28	5	1	14374	83	observed	22,5	11,6	0,3	-0,0256805181183002	4,9	0,563993989782798	3	3	4	5	6	1	1	6	6	6	100	6	Female	-1,49406087602079	T2	10,3204714179658	5,06210096510765	-0,593615441722346	mei	5	1	Week	Monday	69	-3,39792130660727	0	Control	Control
33	primary	new	301	Control	4006	1	10	0	6	2018-05-27	4	1	11565	71	observed	20,3	3,1	1,9	-0,0256805181183002	4,9	0,563993989782798	3	3	4	5	6	1	1	6	6	6	100	6	Female	-1,49406087602079	T2	8,12047141796585	-3,43789903489235	1,00638455827765	mei	5	0	Weekend	Sunday	71	-1,39792130660727	0	Control	Control
33	primary	new	301	Control	4006	1	10	0	6	2018-05-25	2	1	16205	108	observed	20,6	10,5	0	-0,0256805181183002	4,9	0,563993989782798	3	3	4	5	6	1	1	6	6	6	100	6	Female	-1,49406087602079	T2	8,42047141796585	3,96210096510765	-0,893615441722346	mei	5	5	Week	Friday	73	0,602078693392727	0	Control	Control
33	primary	new	301	Control	4006	1	10	0	6	2018-05-26	3	1	16218	91	observed	23	11,9	0	-0,0256805181183002	4,9	0,563993989782798	3	3	4	5	6	1	1	6	6	6	100	6	Female	-1,49406087602079	T2	10,8204714179658	5,36210096510765	-0,893615441722346	mei	5	6	Weekend	Saturday	59	-13,3979213066073	0	Control	Control
33	primary	new	301	Control	4006	1	10	0	7	2018-06-25	5	1	9944	18	observed	16,5	9,6	0	-0,0256805181183002	4,9	0,563993989782798	5	6	4	3	6	1	1	6	6	6	100	6	Female	-1,49406087602079	T3	4,32047141796585	3,06210096510765	-0,893615441722346	juni	6	1	Week	Monday	75	2,60207869339273	0	Control	Control
33	primary	new	301	Control	4006	1	10	0	7	2018-06-23	3	1	8688	12	observed	15,1	4,9	0	-0,0256805181183002	4,9	0,563993989782798	5	6	4	3	6	1	1	6	6	6	100	6	Female	-1,49406087602079	T3	2,92047141796585	-1,63789903489235	-0,893615441722346	juni	6	6	Weekend	Saturday	71	-1,39792130660727	0	Control	Control
33	primary	new	301	Control	4019	0	10	0	7	2018-06-23	3	1	15096	31	imputed	15,1	4,9	0	0,22415154513302	4,7	0,363993989782798	NA	NA	NA	NA	NA	NA	NA	NA	NA	NA	100	6	Male	-1,49406087602079	T3	2,92047141796585	-1,63789903489235	-0,893615441722346	juni	6	6	Weekend	Saturday	71	-1,39792130660727	0	Control	Control
33	primary	new	301	Control	4020	0	9	0	5	2018-03-10	3	1	17500	98	observed	11,4	1,8	6,6	0,186283778723098	5,5	1,1639939897828	4	2	2	6	6	1,67	1	6	1	3,5	100	6	Male	-2,49406087602079	T1	-0,77952858203415	-4,73789903489235	5,70638455827765	maart	3	6	Weekend	Saturday	89	16,6020786933927	0	Control	Control
33	primary	new	301	Control	4020	0	9	0	5	2018-03-11	4	1	7568	34	observed	10,2	2,5	1	0,186283778723098	5,5	1,1639939897828	4	2	2	6	6	1,67	1	6	1	3,5	100	6	Male	-2,49406087602079	T1	-1,97952858203415	-4,03789903489235	0,106384558277654	maart	3	0	Weekend	Sunday	91	18,6020786933927	0	Control	Control
33	primary	new	301	Control	4020	0	9	0	5	2018-03-09	2	1	12570	49	observed	6,5	5,8	5,1	0,186283778723098	5,5	1,1639939897828	4	2	2	6	6	1,67	1	6	1	3,5	100	6	Male	-2,49406087602079	T1	-5,67952858203415	-0,737899034892354	4,20638455827765	maart	3	5	Week	Friday	82	9,60207869339273	0	Control	Control
33	primary	new	301	Control	4020	0	9	0	5	2018-03-12	5	1	10590	70	observed	10,3	2,6	1,8	0,186283778723098	5,5	1,1639939897828	4	2	2	6	6	1,67	1	6	1	3,5	100	6	Male	-2,49406087602079	T1	-1,87952858203415	-3,93789903489235	0,906384558277654	maart	3	1	Week	Monday	85	12,6020786933927	0	Control	Control
33	primary	new	301	Control	4020	0	9	0	5	2018-03-08	1	1	18228	128	observed	4,8	2	3,2	0,186283778723098	5,5	1,1639939897828	4	2	2	6	6	1,67	1	6	1	3,5	100	6	Male	-2,49406087602079	T1	-7,37952858203415	-4,53789903489235	2,30638455827765	maart	3	4	Week	Thursday	84	11,6020786933927	0	Control	Control
33	primary	new	301	Control	4020	0	9	0	6	2018-05-28	5	1	12218	69	observed	22,5	11,6	0,3	0,186283778723098	5,5	1,1639939897828	5	2	7	3,5	6	1	1	6	1	3,5	100	6	Male	-2,49406087602079	T2	10,3204714179658	5,06210096510765	-0,593615441722346	mei	5	1	Week	Monday	69	-3,39792130660727	0	Control	Control
33	primary	new	301	Control	4020	0	9	0	6	2018-05-25	2	1	11168	40	imputed	20,6	10,5	0	0,186283778723098	5,5	1,1639939897828	5	2	7	3,5	6	1	1	6	1	3,5	100	6	Male	-2,49406087602079	T2	8,42047141796585	3,96210096510765	-0,893615441722346	mei	5	5	Week	Friday	73	0,602078693392727	0	Control	Control
33	primary	new	301	Control	4020	0	9	0	6	2018-05-24	1	1	13210	89	observed	18,3	3,1	0,7	0,186283778723098	5,5	1,1639939897828	5	2	7	3,5	6	1	1	6	1	3,5	100	6	Male	-2,49406087602079	T2	6,12047141796585	-3,43789903489235	-0,193615441722346	mei	5	4	Week	Thursday	69	-3,39792130660727	0	Control	Control
33	primary	new	301	Control	4020	0	9	0	6	2018-05-26	3	1	8548	77	imputed	23	11,9	0	0,186283778723098	5,5	1,1639939897828	5	2	7	3,5	6	1	1	6	1	3,5	100	6	Male	-2,49406087602079	T2	10,8204714179658	5,36210096510765	-0,893615441722346	mei	5	6	Weekend	Saturday	59	-13,3979213066073	0	Control	Control
33	primary	new	301	Control	4020	0	9	0	7	2018-06-23	3	1	12941	91	observed	15,1	4,9	0	0,186283778723098	5,5	1,1639939897828	6	6	7	6	6	1	1	1	1	1	100	6	Male	-2,49406087602079	T3	2,92047141796585	-1,63789903489235	-0,893615441722346	juni	6	6	Weekend	Saturday	71	-1,39792130660727	0	Control	Control
33	primary	new	301	Control	4020	0	9	0	7	2018-06-22	2	1	15859	104	observed	13,3	1,5	0	0,186283778723098	5,5	1,1639939897828	6	6	7	6	6	1	1	1	1	1	100	6	Male	-2,49406087602079	T3	1,12047141796585	-5,03789903489235	-0,893615441722346	juni	6	5	Week	Friday	68	-4,39792130660727	0	Control	Control
33	primary	new	301	Control	4020	0	9	0	7	2018-06-21	1	1	12558	90	observed	14,4	8,1	0	0,186283778723098	5,5	1,1639939897828	6	6	7	6	6	1	1	1	1	1	100	6	Male	-2,49406087602079	T3	2,22047141796585	1,56210096510765	-0,893615441722346	juni	6	4	Week	Thursday	68	-4,39792130660727	0	Control	Control
33	primary	new	301	Control	4028	0	10	0	6	2018-05-28	5	1	19266	120	observed	22,5	11,6	0,3	-1,15476167500372	4,45	0,113993989782798	3	2	2	5	6	1,33	1	6	4	5	78	4,9	Male	-1,49406087602079	T2	10,3204714179658	5,06210096510765	-0,593615441722346	mei	5	1	Week	Monday	69	-3,39792130660727	0	Control	Control
33	primary	new	301	Control	4028	0	10	0	6	2018-05-24	1	1	7730	38	observed	18,3	3,1	0,7	-1,15476167500372	4,45	0,113993989782798	3	2	2	5	6	1,33	1	6	4	5	78	4,9	Male	-1,49406087602079	T2	6,12047141796585	-3,43789903489235	-0,193615441722346	mei	5	4	Week	Thursday	69	-3,39792130660727	0	Control	Control
33	primary	new	301	Control	4028	0	10	0	6	2018-05-26	3	1	9439	8	observed	23	11,9	0	-1,15476167500372	4,45	0,113993989782798	3	2	2	5	6	1,33	1	6	4	5	78	4,9	Male	-1,49406087602079	T2	10,8204714179658	5,36210096510765	-0,893615441722346	mei	5	6	Weekend	Saturday	59	-13,3979213066073	0	Control	Control
33	primary	new	301	Control	4028	0	11	0	7	2018-06-22	2	1	7837	0	imputed	13,3	1,5	0	-1,15476167500372	4,45	0,113993989782798	4	2	1	5	6	1	1	6	6	6	100	6	Male	-0,494060876020788	T3	1,12047141796585	-5,03789903489235	-0,893615441722346	juni	6	5	Week	Friday	68	-4,39792130660727	0	Control	Control
33	primary	new	301	Control	4028	0	11	0	7	2018-06-23	3	1	15637	31	imputed	15,1	4,9	0	-1,15476167500372	4,45	0,113993989782798	4	2	1	5	6	1	1	6	6	6	100	6	Male	-0,494060876020788	T3	2,92047141796585	-1,63789903489235	-0,893615441722346	juni	6	6	Weekend	Saturday	71	-1,39792130660727	0	Control	Control
33	primary	new	301	Control	4021	1	9	0	6	2018-05-26	3	1	7796	9	observed	23	11,9	0	-0,110210913369631	4	-0,336006010217202	2	2	2	3,5	5,67	1	1	6	6	6	100	6	Female	-2,49406087602079	T2	10,8204714179658	5,36210096510765	-0,893615441722346	mei	5	6	Weekend	Saturday	59	-13,3979213066073	0	Control	Control
33	primary	new	301	Control	4021	1	9	0	6	2018-05-24	1	1	11445	17	observed	18,3	3,1	0,7	-0,110210913369631	4	-0,336006010217202	2	2	2	3,5	5,67	1	1	6	6	6	100	6	Female	-2,49406087602079	T2	6,12047141796585	-3,43789903489235	-0,193615441722346	mei	5	4	Week	Thursday	69	-3,39792130660727	0	Control	Control
33	primary	new	301	Control	4021	1	9	0	6	2018-05-28	5	1	8680	33	observed	22,5	11,6	0,3	-0,110210913369631	4	-0,336006010217202	2	2	2	3,5	5,67	1	1	6	6	6	100	6	Female	-2,49406087602079	T2	10,3204714179658	5,06210096510765	-0,593615441722346	mei	5	1	Week	Monday	69	-3,39792130660727	0	Control	Control
33	primary	new	301	Control	4021	1	9	0	6	2018-05-25	2	1	9535	10	observed	20,6	10,5	0	-0,110210913369631	4	-0,336006010217202	2	2	2	3,5	5,67	1	1	6	6	6	100	6	Female	-2,49406087602079	T2	8,42047141796585	3,96210096510765	-0,893615441722346	mei	5	5	Week	Friday	73	0,602078693392727	0	Control	Control
33	primary	new	301	Control	4021	1	9	0	7	2018-06-22	2	1	4177	0	imputed	13,3	1,5	0	-0,110210913369631	4	-0,336006010217202	4	0	2	6	6	6	4,33	5	6	5,5	36	2,8	Female	-2,49406087602079	T3	1,12047141796585	-5,03789903489235	-0,893615441722346	juni	6	5	Week	Friday	68	-4,39792130660727	0	Control	Control
33	primary	new	301	Control	4021	1	9	0	7	2018-06-23	3	1	2307	0	imputed	15,1	4,9	0	-0,110210913369631	4	-0,336006010217202	4	0	2	6	6	6	4,33	5	6	5,5	36	2,8	Female	-2,49406087602079	T3	2,92047141796585	-1,63789903489235	-0,893615441722346	juni	6	6	Weekend	Saturday	71	-1,39792130660727	0	Control	Control
33	primary	new	301	Control	4021	1	9	0	7	2018-06-21	1	1	5195	0	observed	14,4	8,1	0	-0,110210913369631	4	-0,336006010217202	4	0	2	6	6	6	4,33	5	6	5,5	36	2,8	Female	-2,49406087602079	T3	2,22047141796585	1,56210096510765	-0,893615441722346	juni	6	4	Week	Thursday	68	-4,39792130660727	0	Control	Control
33	primary	new	301	Control	4021	1	9	0	7	2018-06-25	5	1	1043	0	observed	16,5	9,6	0	-0,110210913369631	4	-0,336006010217202	4	0	2	6	6	6	4,33	5	6	5,5	36	2,8	Female	-2,49406087602079	T3	4,32047141796585	3,06210096510765	-0,893615441722346	juni	6	1	Week	Monday	75	2,60207869339273	0	Control	Control
33	primary	new	301	Control	4023	0	9	0	5	2018-03-09	2	1	11577	42	observed	6,5	5,8	5,1	-0,289591306817335	5,6	1,2639939897828	5	1	0	5	5,33	2,67	1,33	6	4	5	100	6	Male	-2,49406087602079	T1	-5,67952858203415	-0,737899034892354	4,20638455827765	maart	3	5	Week	Friday	82	9,60207869339273	0	Control	Control
33	primary	new	301	Control	4023	0	9	0	5	2018-03-10	3	1	15200	66	observed	11,4	1,8	6,6	-0,289591306817335	5,6	1,2639939897828	5	1	0	5	5,33	2,67	1,33	6	4	5	100	6	Male	-2,49406087602079	T1	-0,77952858203415	-4,73789903489235	5,70638455827765	maart	3	6	Weekend	Saturday	89	16,6020786933927	0	Control	Control
33	primary	new	301	Control	4023	0	9	0	5	2018-03-12	5	1	15921	102	observed	10,3	2,6	1,8	-0,289591306817335	5,6	1,2639939897828	5	1	0	5	5,33	2,67	1,33	6	4	5	100	6	Male	-2,49406087602079	T1	-1,87952858203415	-3,93789903489235	0,906384558277654	maart	3	1	Week	Monday	85	12,6020786933927	0	Control	Control
33	primary	new	301	Control	4023	0	9	0	5	2018-03-08	1	1	14972	75	observed	4,8	2	3,2	-0,289591306817335	5,6	1,2639939897828	5	1	0	5	5,33	2,67	1,33	6	4	5	100	6	Male	-2,49406087602079	T1	-7,37952858203415	-4,53789903489235	2,30638455827765	maart	3	4	Week	Thursday	84	11,6020786933927	0	Control	Control
33	primary	new	301	Control	4023	0	9	0	5	2018-03-11	4	1	7310	0	observed	10,2	2,5	1	-0,289591306817335	5,6	1,2639939897828	5	1	0	5	5,33	2,67	1,33	6	4	5	100	6	Male	-2,49406087602079	T1	-1,97952858203415	-4,03789903489235	0,106384558277654	maart	3	0	Weekend	Sunday	91	18,6020786933927	0	Control	Control
33	primary	new	301	Control	4023	0	10	0	6	2018-05-25	2	1	17401	78	observed	20,6	10,5	0	-0,289591306817335	5,6	1,2639939897828	NA	NA	NA	NA	NA	NA	NA	NA	NA	NA	100	6	Male	-1,49406087602079	T2	8,42047141796585	3,96210096510765	-0,893615441722346	mei	5	5	Week	Friday	73	0,602078693392727	0	Control	Control
33	primary	new	301	Control	4026	0	10	0	5	2018-03-11	4	1	8595	29	observed	10,2	2,5	1	-0,825707218983914	4,1	-0,236006010217203	1	4	5	3	4,67	3	3	6	6	6	55	3,75	Male	-1,49406087602079	T1	-1,97952858203415	-4,03789903489235	0,106384558277654	maart	3	0	Weekend	Sunday	91	18,6020786933927	0	Control	Control
33	primary	new	301	Control	4026	0	10	0	5	2018-03-09	2	1	11424	44	observed	6,5	5,8	5,1	-0,825707218983914	4,1	-0,236006010217203	1	4	5	3	4,67	3	3	6	6	6	55	3,75	Male	-1,49406087602079	T1	-5,67952858203415	-0,737899034892354	4,20638455827765	maart	3	5	Week	Friday	82	9,60207869339273	0	Control	Control
33	primary	new	301	Control	4026	0	10	0	6	2018-05-28	5	1	8775	52	observed	22,5	11,6	0,3	-0,825707218983914	4,1	-0,236006010217203	2	1	1	6	6	6	6	5	5	5	77	4,85	Male	-1,49406087602079	T2	10,3204714179658	5,06210096510765	-0,593615441722346	mei	5	1	Week	Monday	69	-3,39792130660727	0	Control	Control
33	primary	new	301	Control	4026	0	10	0	6	2018-05-27	4	1	6620	33	observed	20,3	3,1	1,9	-0,825707218983914	4,1	-0,236006010217203	2	1	1	6	6	6	6	5	5	5	77	4,85	Male	-1,49406087602079	T2	8,12047141796585	-3,43789903489235	1,00638455827765	mei	5	0	Weekend	Sunday	71	-1,39792130660727	0	Control	Control
33	primary	new	301	Control	4026	0	10	0	6	2018-05-24	1	1	10564	64	observed	18,3	3,1	0,7	-0,825707218983914	4,1	-0,236006010217203	2	1	1	6	6	6	6	5	5	5	77	4,85	Male	-1,49406087602079	T2	6,12047141796585	-3,43789903489235	-0,193615441722346	mei	5	4	Week	Thursday	69	-3,39792130660727	0	Control	Control
33	primary	new	301	Control	4026	0	10	0	6	2018-05-26	3	1	7903	15	observed	23	11,9	0	-0,825707218983914	4,1	-0,236006010217203	2	1	1	6	6	6	6	5	5	5	77	4,85	Male	-1,49406087602079	T2	10,8204714179658	5,36210096510765	-0,893615441722346	mei	5	6	Weekend	Saturday	59	-13,3979213066073	0	Control	Control
33	primary	new	301	Control	4026	0	10	0	6	2018-05-25	2	1	16340	82	observed	20,6	10,5	0	-0,825707218983914	4,1	-0,236006010217203	2	1	1	6	6	6	6	5	5	5	77	4,85	Male	-1,49406087602079	T2	8,42047141796585	3,96210096510765	-0,893615441722346	mei	5	5	Week	Friday	73	0,602078693392727	0	Control	Control
33	primary	new	301	Control	4026	0	10	0	7	2018-06-23	3	1	2639	0	observed	15,1	4,9	0	-0,825707218983914	4,1	-0,236006010217203	3	2	3	6	6	5,67	1	6	6	6	76	4,8	Male	-1,49406087602079	T3	2,92047141796585	-1,63789903489235	-0,893615441722346	juni	6	6	Weekend	Saturday	71	-1,39792130660727	0	Control	Control
33	primary	new	301	Control	4026	0	10	0	7	2018-06-21	1	1	8686	40	observed	14,4	8,1	0	-0,825707218983914	4,1	-0,236006010217203	3	2	3	6	6	5,67	1	6	6	6	76	4,8	Male	-1,49406087602079	T3	2,22047141796585	1,56210096510765	-0,893615441722346	juni	6	4	Week	Thursday	68	-4,39792130660727	0	Control	Control
33	primary	new	301	Control	4026	0	10	0	7	2018-06-22	2	1	13717	83	observed	13,3	1,5	0	-0,825707218983914	4,1	-0,236006010217203	3	2	3	6	6	5,67	1	6	6	6	76	4,8	Male	-1,49406087602079	T3	1,12047141796585	-5,03789903489235	-0,893615441722346	juni	6	5	Week	Friday	68	-4,39792130660727	0	Control	Control
33	primary	new	301	Control	4026	0	10	0	7	2018-06-24	4	1	5849	0	observed	14,7	0,7	0	-0,825707218983914	4,1	-0,236006010217203	3	2	3	6	6	5,67	1	6	6	6	76	4,8	Male	-1,49406087602079	T3	2,52047141796585	-5,83789903489235	-0,893615441722346	juni	6	0	Weekend	Sunday	78	5,60207869339273	0	Control	Control
33	primary	new	301	Control	4026	0	10	0	7	2018-06-25	5	1	13529	56	observed	16,5	9,6	0	-0,825707218983914	4,1	-0,236006010217203	3	2	3	6	6	5,67	1	6	6	6	76	4,8	Male	-1,49406087602079	T3	4,32047141796585	3,06210096510765	-0,893615441722346	juni	6	1	Week	Monday	75	2,60207869339273	0	Control	Control
33	primary	new	301	Control	4028	0	10	0	5	2018-03-08	1	1	11980	45	observed	4,8	2	3,2	-1,15476167500372	4,45	0,113993989782798	5	4	0	5	5,67	2,67	2	4	5	4,5	85	5,25	Male	-1,49406087602079	T1	-7,37952858203415	-4,53789903489235	2,30638455827765	maart	3	4	Week	Thursday	84	11,6020786933927	0	Control	Control
33	primary	new	301	Control	4028	0	10	0	5	2018-03-11	4	1	8120	13	observed	10,2	2,5	1	-1,15476167500372	4,45	0,113993989782798	5	4	0	5	5,67	2,67	2	4	5	4,5	85	5,25	Male	-1,49406087602079	T1	-1,97952858203415	-4,03789903489235	0,106384558277654	maart	3	0	Weekend	Sunday	91	18,6020786933927	0	Control	Control
33	primary	new	301	Control	4028	0	10	0	5	2018-03-09	2	1	10008	43	observed	6,5	5,8	5,1	-1,15476167500372	4,45	0,113993989782798	5	4	0	5	5,67	2,67	2	4	5	4,5	85	5,25	Male	-1,49406087602079	T1	-5,67952858203415	-0,737899034892354	4,20638455827765	maart	3	5	Week	Friday	82	9,60207869339273	0	Control	Control
33	primary	new	301	Control	4028	0	10	0	5	2018-03-10	3	1	17517	116	observed	11,4	1,8	6,6	-1,15476167500372	4,45	0,113993989782798	5	4	0	5	5,67	2,67	2	4	5	4,5	85	5,25	Male	-1,49406087602079	T1	-0,77952858203415	-4,73789903489235	5,70638455827765	maart	3	6	Weekend	Saturday	89	16,6020786933927	0	Control	Control
33	primary	new	301	Control	4028	0	10	0	5	2018-03-12	5	1	12990	68	observed	10,3	2,6	1,8	-1,15476167500372	4,45	0,113993989782798	5	4	0	5	5,67	2,67	2	4	5	4,5	85	5,25	Male	-1,49406087602079	T1	-1,87952858203415	-3,93789903489235	0,906384558277654	maart	3	1	Week	Monday	85	12,6020786933927	0	Control	Control
33	primary	new	301	Control	4028	0	10	0	6	2018-05-25	2	1	13566	71	observed	20,6	10,5	0	-1,15476167500372	4,45	0,113993989782798	3	2	2	5	6	1,33	1	6	4	5	78	4,9	Male	-1,49406087602079	T2	8,42047141796585	3,96210096510765	-0,893615441722346	mei	5	5	Week	Friday	73	0,602078693392727	0	Control	Control
33	primary	new	301	Control	4028	0	10	0	6	2018-05-27	4	1	8013	35	observed	20,3	3,1	1,9	-1,15476167500372	4,45	0,113993989782798	3	2	2	5	6	1,33	1	6	4	5	78	4,9	Male	-1,49406087602079	T2	8,12047141796585	-3,43789903489235	1,00638455827765	mei	5	0	Weekend	Sunday	71	-1,39792130660727	0	Control	Control
33	primary	new	301	Control	4025	0	9	0	7	2018-06-21	1	1	11519	75	observed	14,4	8,1	0	-0,585535873208819	4,3	-0,0360060102172026	1	2	1	1,5	3,67	1	1,33	4	4	4	52	3,6	Male	-2,49406087602079	T3	2,22047141796585	1,56210096510765	-0,893615441722346	juni	6	4	Week	Thursday	68	-4,39792130660727	0	Control	Control
33	primary	new	301	Control	4025	0	9	0	7	2018-06-22	2	1	8880	53	observed	13,3	1,5	0	-0,585535873208819	4,3	-0,0360060102172026	1	2	1	1,5	3,67	1	1,33	4	4	4	52	3,6	Male	-2,49406087602079	T3	1,12047141796585	-5,03789903489235	-0,893615441722346	juni	6	5	Week	Friday	68	-4,39792130660727	0	Control	Control
33	primary	new	301	Control	4025	0	9	0	7	2018-06-24	4	1	1204	0	observed	14,7	0,7	0	-0,585535873208819	4,3	-0,0360060102172026	1	2	1	1,5	3,67	1	1,33	4	4	4	52	3,6	Male	-2,49406087602079	T3	2,52047141796585	-5,83789903489235	-0,893615441722346	juni	6	0	Weekend	Sunday	78	5,60207869339273	0	Control	Control
33	primary	new	301	Control	4026	0	10	0	5	2018-03-10	3	1	4758	8	observed	11,4	1,8	6,6	-0,825707218983914	4,1	-0,236006010217203	1	4	5	3	4,67	3	3	6	6	6	55	3,75	Male	-1,49406087602079	T1	-0,77952858203415	-4,73789903489235	5,70638455827765	maart	3	6	Weekend	Saturday	89	16,6020786933927	0	Control	Control
33	primary	new	301	Control	4026	0	10	0	5	2018-03-12	5	1	13138	51	observed	10,3	2,6	1,8	-0,825707218983914	4,1	-0,236006010217203	1	4	5	3	4,67	3	3	6	6	6	55	3,75	Male	-1,49406087602079	T1	-1,87952858203415	-3,93789903489235	0,906384558277654	maart	3	1	Week	Monday	85	12,6020786933927	0	Control	Control
33	primary	new	301	Control	4028	0	11	0	7	2018-06-21	1	1	12989	25	imputed	14,4	8,1	0	-1,15476167500372	4,45	0,113993989782798	4	2	1	5	6	1	1	6	6	6	100	6	Male	-0,494060876020788	T3	2,22047141796585	1,56210096510765	-0,893615441722346	juni	6	4	Week	Thursday	68	-4,39792130660727	0	Control	Control
33	primary	new	301	Control	4029	0	10	0	5	2018-03-10	3	1	2788	0	observed	11,4	1,8	6,6	1,59925706761455	4,8	0,463993989782798	3	3	3	5,5	5,67	2,33	1	6	6	6	75	4,75	Male	-1,49406087602079	T1	-0,77952858203415	-4,73789903489235	5,70638455827765	maart	3	6	Weekend	Saturday	89	16,6020786933927	0	Control	Control
33	primary	new	301	Control	4029	0	10	0	5	2018-03-09	2	1	1877	0	observed	6,5	5,8	5,1	1,59925706761455	4,8	0,463993989782798	3	3	3	5,5	5,67	2,33	1	6	6	6	75	4,75	Male	-1,49406087602079	T1	-5,67952858203415	-0,737899034892354	4,20638455827765	maart	3	5	Week	Friday	82	9,60207869339273	0	Control	Control
33	primary	new	301	Control	4025	0	9	0	6	2018-05-26	3	1	2520	0	observed	23	11,9	0	-0,585535873208819	4,3	-0,0360060102172026	1	2	1	3,5	4,33	1	1	4	6	5	58	3,9	Male	-2,49406087602079	T2	10,8204714179658	5,36210096510765	-0,893615441722346	mei	5	6	Weekend	Saturday	59	-13,3979213066073	0	Control	Control
33	primary	new	301	Control	4025	0	9	0	6	2018-05-25	2	1	6738	0	observed	20,6	10,5	0	-0,585535873208819	4,3	-0,0360060102172026	1	2	1	3,5	4,33	1	1	4	6	5	58	3,9	Male	-2,49406087602079	T2	8,42047141796585	3,96210096510765	-0,893615441722346	mei	5	5	Week	Friday	73	0,602078693392727	0	Control	Control
33	primary	new	301	Control	4025	0	9	0	6	2018-05-24	1	1	10700	84	observed	18,3	3,1	0,7	-0,585535873208819	4,3	-0,0360060102172026	1	2	1	3,5	4,33	1	1	4	6	5	58	3,9	Male	-2,49406087602079	T2	6,12047141796585	-3,43789903489235	-0,193615441722346	mei	5	4	Week	Thursday	69	-3,39792130660727	0	Control	Control
33	primary	new	301	Control	4025	0	9	0	6	2018-05-27	4	1	3394	0	observed	20,3	3,1	1,9	-0,585535873208819	4,3	-0,0360060102172026	1	2	1	3,5	4,33	1	1	4	6	5	58	3,9	Male	-2,49406087602079	T2	8,12047141796585	-3,43789903489235	1,00638455827765	mei	5	0	Weekend	Sunday	71	-1,39792130660727	0	Control	Control
33	primary	new	301	Control	4025	0	9	0	7	2018-06-23	3	1	12438	66	observed	15,1	4,9	0	-0,585535873208819	4,3	-0,0360060102172026	1	2	1	1,5	3,67	1	1,33	4	4	4	52	3,6	Male	-2,49406087602079	T3	2,92047141796585	-1,63789903489235	-0,893615441722346	juni	6	6	Weekend	Saturday	71	-1,39792130660727	0	Control	Control
33	primary	new	301	Control	4019	0	10	0	7	2018-06-21	1	1	12422	14	imputed	14,4	8,1	0	0,22415154513302	4,7	0,363993989782798	NA	NA	NA	NA	NA	NA	NA	NA	NA	NA	100	6	Male	-1,49406087602079	T3	2,22047141796585	1,56210096510765	-0,893615441722346	juni	6	4	Week	Thursday	68	-4,39792130660727	0	Control	Control
33	primary	new	301	Control	4017	0	9	0	7	2018-06-23	3	1	7815	45	imputed	15,1	4,9	0	-0,132569337537533	5,2	0,863993989782798	NA	NA	NA	NA	NA	NA	NA	NA	NA	NA	100	6	Male	-2,49406087602079	T3	2,92047141796585	-1,63789903489235	-0,893615441722346	juni	6	6	Weekend	Saturday	71	-1,39792130660727	0	Control	Control
33	primary	new	301	Control	4017	0	9	0	7	2018-06-22	2	1	9454	69	observed	13,3	1,5	0	-0,132569337537533	5,2	0,863993989782798	NA	NA	NA	NA	NA	NA	NA	NA	NA	NA	100	6	Male	-2,49406087602079	T3	1,12047141796585	-5,03789903489235	-0,893615441722346	juni	6	5	Week	Friday	68	-4,39792130660727	0	Control	Control
33	primary	new	301	Control	4019	0	10	0	5	2018-03-09	2	1	8526	30	observed	6,5	5,8	5,1	0,22415154513302	4,7	0,363993989782798	2	1	1	5	5,67	1,67	1	3	6	4,5	100	6	Male	-1,49406087602079	T1	-5,67952858203415	-0,737899034892354	4,20638455827765	maart	3	5	Week	Friday	82	9,60207869339273	0	Control	Control
33	primary	new	301	Control	4019	0	10	0	5	2018-03-12	5	1	11968	22	observed	10,3	2,6	1,8	0,22415154513302	4,7	0,363993989782798	2	1	1	5	5,67	1,67	1	3	6	4,5	100	6	Male	-1,49406087602079	T1	-1,87952858203415	-3,93789903489235	0,906384558277654	maart	3	1	Week	Monday	85	12,6020786933927	0	Control	Control
33	primary	new	301	Control	4026	0	10	0	5	2018-03-08	1	1	11069	42	observed	4,8	2	3,2	-0,825707218983914	4,1	-0,236006010217203	1	4	5	3	4,67	3	3	6	6	6	55	3,75	Male	-1,49406087602079	T1	-7,37952858203415	-4,53789903489235	2,30638455827765	maart	3	4	Week	Thursday	84	11,6020786933927	0	Control	Control
33	primary	new	301	Control	4029	0	10	0	7	2018-06-23	3	1	16417	0	imputed	15,1	4,9	0	1,59925706761455	4,8	0,463993989782798	5	4	3	5	4,67	4,33	5	4	5	4,5	100	6	Male	-1,49406087602079	T3	2,92047141796585	-1,63789903489235	-0,893615441722346	juni	6	6	Weekend	Saturday	71	-1,39792130660727	0	Control	Control
33	primary	new	301	Control	4019	0	10	0	6	2018-05-24	1	1	16258	96	observed	18,3	3,1	0,7	0,22415154513302	4,7	0,363993989782798	4	1	1	4,5	4	1	1,33	4	5	4,5	100	6	Male	-1,49406087602079	T2	6,12047141796585	-3,43789903489235	-0,193615441722346	mei	5	4	Week	Thursday	69	-3,39792130660727	0	Control	Control
33	primary	new	301	Control	4019	0	10	0	6	2018-05-26	3	1	11764	15	observed	23	11,9	0	0,22415154513302	4,7	0,363993989782798	4	1	1	4,5	4	1	1,33	4	5	4,5	100	6	Male	-1,49406087602079	T2	10,8204714179658	5,36210096510765	-0,893615441722346	mei	5	6	Weekend	Saturday	59	-13,3979213066073	0	Control	Control
33	primary	new	301	Control	4019	0	10	0	6	2018-05-27	4	1	9674	34	observed	20,3	3,1	1,9	0,22415154513302	4,7	0,363993989782798	4	1	1	4,5	4	1	1,33	4	5	4,5	100	6	Male	-1,49406087602079	T2	8,12047141796585	-3,43789903489235	1,00638455827765	mei	5	0	Weekend	Sunday	71	-1,39792130660727	0	Control	Control
33	primary	new	301	Control	4019	0	10	0	6	2018-05-28	5	1	15311	80	observed	22,5	11,6	0,3	0,22415154513302	4,7	0,363993989782798	4	1	1	4,5	4	1	1,33	4	5	4,5	100	6	Male	-1,49406087602079	T2	10,3204714179658	5,06210096510765	-0,593615441722346	mei	5	1	Week	Monday	69	-3,39792130660727	0	Control	Control
33	primary	new	301	Control	4019	0	10	0	6	2018-05-25	2	1	14473	59	observed	20,6	10,5	0	0,22415154513302	4,7	0,363993989782798	4	1	1	4,5	4	1	1,33	4	5	4,5	100	6	Male	-1,49406087602079	T2	8,42047141796585	3,96210096510765	-0,893615441722346	mei	5	5	Week	Friday	73	0,602078693392727	0	Control	Control
33	primary	new	301	Control	4019	0	10	0	7	2018-06-22	2	1	15402	64	imputed	13,3	1,5	0	0,22415154513302	4,7	0,363993989782798	NA	NA	NA	NA	NA	NA	NA	NA	NA	NA	100	6	Male	-1,49406087602079	T3	1,12047141796585	-5,03789903489235	-0,893615441722346	juni	6	5	Week	Friday	68	-4,39792130660727	0	Control	Control
33	primary	new	301	Control	4017	0	9	0	7	2018-06-21	1	1	13049	66	observed	14,4	8,1	0	-0,132569337537533	5,2	0,863993989782798	NA	NA	NA	NA	NA	NA	NA	NA	NA	NA	100	6	Male	-2,49406087602079	T3	2,22047141796585	1,56210096510765	-0,893615441722346	juni	6	4	Week	Thursday	68	-4,39792130660727	0	Control	Control
33	primary	new	301	Control	4029	0	10	0	6	2018-05-27	4	1	10300	21	observed	20,3	3,1	1,9	1,59925706761455	4,8	0,463993989782798	7	4	3	4	5	1	1	6	1	3,5	67	4,35	Male	-1,49406087602079	T2	8,12047141796585	-3,43789903489235	1,00638455827765	mei	5	0	Weekend	Sunday	71	-1,39792130660727	0	Control	Control
33	primary	new	301	Control	4029	0	10	0	6	2018-05-25	2	1	9691	14	observed	20,6	10,5	0	1,59925706761455	4,8	0,463993989782798	7	4	3	4	5	1	1	6	1	3,5	67	4,35	Male	-1,49406087602079	T2	8,42047141796585	3,96210096510765	-0,893615441722346	mei	5	5	Week	Friday	73	0,602078693392727	0	Control	Control
33	primary	new	301	Control	4029	0	10	0	6	2018-05-24	1	1	16823	102	observed	18,3	3,1	0,7	1,59925706761455	4,8	0,463993989782798	7	4	3	4	5	1	1	6	1	3,5	67	4,35	Male	-1,49406087602079	T2	6,12047141796585	-3,43789903489235	-0,193615441722346	mei	5	4	Week	Thursday	69	-3,39792130660727	0	Control	Control
33	primary	new	301	Control	4029	0	10	0	6	2018-05-28	5	1	10826	20	observed	22,5	11,6	0,3	1,59925706761455	4,8	0,463993989782798	7	4	3	4	5	1	1	6	1	3,5	67	4,35	Male	-1,49406087602079	T2	10,3204714179658	5,06210096510765	-0,593615441722346	mei	5	1	Week	Monday	69	-3,39792130660727	0	Control	Control
33	primary	new	301	Control	4019	0	10	0	5	2018-03-08	1	1	9777	36	observed	4,8	2	3,2	0,22415154513302	4,7	0,363993989782798	2	1	1	5	5,67	1,67	1	3	6	4,5	100	6	Male	-1,49406087602079	T1	-7,37952858203415	-4,53789903489235	2,30638455827765	maart	3	4	Week	Thursday	84	11,6020786933927	0	Control	Control
33	primary	new	301	Control	4019	0	10	0	5	2018-03-11	4	1	12153	59	observed	10,2	2,5	1	0,22415154513302	4,7	0,363993989782798	2	1	1	5	5,67	1,67	1	3	6	4,5	100	6	Male	-1,49406087602079	T1	-1,97952858203415	-4,03789903489235	0,106384558277654	maart	3	0	Weekend	Sunday	91	18,6020786933927	0	Control	Control
33	primary	new	301	Control	4029	0	10	0	7	2018-06-24	4	1	1256	0	observed	14,7	0,7	0	1,59925706761455	4,8	0,463993989782798	5	4	3	5	4,67	4,33	5	4	5	4,5	100	6	Male	-1,49406087602079	T3	2,52047141796585	-5,83789903489235	-0,893615441722346	juni	6	0	Weekend	Sunday	78	5,60207869339273	0	Control	Control
33	primary	new	301	Control	4029	0	10	0	7	2018-06-21	1	1	14158	100	imputed	14,4	8,1	0	1,59925706761455	4,8	0,463993989782798	5	4	3	5	4,67	4,33	5	4	5	4,5	100	6	Male	-1,49406087602079	T3	2,22047141796585	1,56210096510765	-0,893615441722346	juni	6	4	Week	Thursday	68	-4,39792130660727	0	Control	Control
33	primary	new	301	Control	4029	0	10	0	5	2018-03-08	1	1	1640	0	observed	4,8	2	3,2	1,59925706761455	4,8	0,463993989782798	3	3	3	5,5	5,67	2,33	1	6	6	6	75	4,75	Male	-1,49406087602079	T1	-7,37952858203415	-4,53789903489235	2,30638455827765	maart	3	4	Week	Thursday	84	11,6020786933927	0	Control	Control
33	primary	new	301	Control	4017	0	9	0	6	2018-05-24	1	1	10066	23	observed	18,3	3,1	0,7	-0,132569337537533	5,2	0,863993989782798	2	2	1	6	6	2,67	1	6	6	6	100	6	Male	-2,49406087602079	T2	6,12047141796585	-3,43789903489235	-0,193615441722346	mei	5	4	Week	Thursday	69	-3,39792130660727	0	Control	Control
33	primary	new	301	Control	4017	0	9	0	6	2018-05-27	4	1	4887	0	observed	20,3	3,1	1,9	-0,132569337537533	5,2	0,863993989782798	2	2	1	6	6	2,67	1	6	6	6	100	6	Male	-2,49406087602079	T2	8,12047141796585	-3,43789903489235	1,00638455827765	mei	5	0	Weekend	Sunday	71	-1,39792130660727	0	Control	Control
33	primary	new	301	Control	4017	0	9	0	6	2018-05-26	3	1	5201	0	observed	23	11,9	0	-0,132569337537533	5,2	0,863993989782798	2	2	1	6	6	2,67	1	6	6	6	100	6	Male	-2,49406087602079	T2	10,8204714179658	5,36210096510765	-0,893615441722346	mei	5	6	Weekend	Saturday	59	-13,3979213066073	0	Control	Control
33	primary	new	301	Control	4029	0	10	0	6	2018-05-26	3	1	4337	0	observed	23	11,9	0	1,59925706761455	4,8	0,463993989782798	7	4	3	4	5	1	1	6	1	3,5	67	4,35	Male	-1,49406087602079	T2	10,8204714179658	5,36210096510765	-0,893615441722346	mei	5	6	Weekend	Saturday	59	-13,3979213066073	0	Control	Control
33	primary	new	301	Control	4029	0	10	0	7	2018-06-22	2	1	1735	0	imputed	13,3	1,5	0	1,59925706761455	4,8	0,463993989782798	5	4	3	5	4,67	4,33	5	4	5	4,5	100	6	Male	-1,49406087602079	T3	1,12047141796585	-5,03789903489235	-0,893615441722346	juni	6	5	Week	Friday	68	-4,39792130660727	0	Control	Control
33	primary	new	301	Control	4029	0	10	0	7	2018-06-25	5	1	16571	116	observed	16,5	9,6	0	1,59925706761455	4,8	0,463993989782798	5	4	3	5	4,67	4,33	5	4	5	4,5	100	6	Male	-1,49406087602079	T3	4,32047141796585	3,06210096510765	-0,893615441722346	juni	6	1	Week	Monday	75	2,60207869339273	0	Control	Control
34	primary	old	103	PA_SNI	341	1	12	0	7	2018-06-30	2	1	12916	29	imputed	21,3	15,3	0	-2,02363285715646	4,3	-0,0360060102172026	NA	NA	NA	NA	NA	NA	NA	NA	NA	NA	NA	NA	Female	0,505939123979212	T3	9,12047141796585	8,76210096510765	-0,893615441722346	juni	6	6	Weekend	Saturday	51	-21,3979213066073	0	PA_SNI	PA_SNI
34	primary	old	103	PA_SNI	340	0	12	0	7	2018-07-01	3	1	15951	0	imputed	21,3	15,3	0	-0,698463978366325	3,47362416386066	-0,862381846356546	NA	NA	NA	NA	NA	NA	NA	NA	NA	NA	NA	NA	Male	0,505939123979212	T3	9,12047141796585	8,76210096510765	-0,893615441722346	juli	7	0	Weekend	Sunday	36	-36,3979213066073	0	PA_SNI	PA_SNI
34	primary	old	103	PA_SNI	342	1	11	0	7	2018-06-30	2	1	5226	61	imputed	21,3	15,3	0	-1,89242145172206	4,5	0,163993989782798	NA	NA	NA	NA	NA	NA	NA	NA	NA	NA	76	4,8	Female	-0,494060876020788	T3	9,12047141796585	8,76210096510765	-0,893615441722346	juni	6	6	Weekend	Saturday	51	-21,3979213066073	0	PA_SNI	PA_SNI
34	primary	old	103	PA_SNI	340	0	12	0	6	2018-06-01	1	1	22079	78	imputed	17,6	1,2	1,5	-0,698463978366325	3,47362416386066	-0,862381846356546	NA	NA	NA	NA	NA	NA	NA	NA	NA	NA	NA	NA	Male	0,505939123979212	T2	5,42047141796585	-5,33789903489235	0,606384558277654	juni	6	5	Week	Friday	90	17,6020786933927	0	PA_SNI	PA_SNI
34	primary	old	103	PA_SNI	342	1	11	0	7	2018-06-29	1	1	6962	34	imputed	19,5	15,3	0	-1,89242145172206	4,5	0,163993989782798	NA	NA	NA	NA	NA	NA	NA	NA	NA	NA	76	4,8	Female	-0,494060876020788	T3	7,32047141796585	8,76210096510765	-0,893615441722346	juni	6	5	Week	Friday	66	-6,39792130660727	0	PA_SNI	PA_SNI
34	primary	old	103	PA_SNI	342	1	11	0	5	2018-03-12	3	1	7393	11	observed	10,3	2,6	1,8	-1,89242145172206	4,5	0,163993989782798	1	1	2	5	5,67	1,67	1	2	4	3	88	5,4	Female	-0,494060876020788	T1	-1,87952858203415	-3,93789903489235	0,906384558277654	maart	3	1	Week	Monday	85	12,6020786933927	0	PA_SNI	PA_SNI
34	primary	old	103	PA_SNI	342	1	11	0	5	2018-03-10	1	1	6011	0	observed	11,4	1,8	6,6	-1,89242145172206	4,5	0,163993989782798	1	1	2	5	5,67	1,67	1	2	4	3	88	5,4	Female	-0,494060876020788	T1	-0,77952858203415	-4,73789903489235	5,70638455827765	maart	3	6	Weekend	Saturday	89	16,6020786933927	0	PA_SNI	PA_SNI
34	primary	old	103	PA_SNI	342	1	11	0	5	2018-03-14	5	1	6763	24	observed	5,8	9,4	0	-1,89242145172206	4,5	0,163993989782798	1	1	2	5	5,67	1,67	1	2	4	3	88	5,4	Female	-0,494060876020788	T1	-6,37952858203415	2,86210096510765	-0,893615441722346	maart	3	3	Week	Wednesday	80	7,60207869339273	0	PA_SNI	PA_SNI
34	primary	old	103	PA_SNI	340	0	12	0	5	2018-03-13	4	1	1887	9	observed	5,6	0	7,6	-0,698463978366325	3,47362416386066	-0,862381846356546	NA	NA	NA	NA	NA	NA	NA	NA	NA	NA	NA	NA	Male	0,505939123979212	T1	-6,57952858203415	-6,53789903489235	6,70638455827765	maart	3	2	Week	Tuesday	92	19,6020786933927	0	PA_SNI	PA_SNI
34	primary	old	103	PA_SNI	343	1	11	0	5	2018-03-10	1	1	4913	0	observed	11,4	1,8	6,6	2,37637348212247	3,4	-0,936006010217203	6	4	5	5	5	5	5	5	5	5	79	4,95	Female	-0,494060876020788	T1	-0,77952858203415	-4,73789903489235	5,70638455827765	maart	3	6	Weekend	Saturday	89	16,6020786933927	0	PA_SNI	PA_SNI
34	primary	old	103	PA_SNI	340	0	12	0	6	2018-06-03	3	1	3905	140	imputed	19,3	4,6	0	-0,698463978366325	3,47362416386066	-0,862381846356546	NA	NA	NA	NA	NA	NA	NA	NA	NA	NA	NA	NA	Male	0,505939123979212	T2	7,12047141796585	-1,93789903489235	-0,893615441722346	juni	6	0	Weekend	Sunday	79	6,60207869339273	0	PA_SNI	PA_SNI
34	primary	old	103	PA_SNI	340	0	12	0	6	2018-06-02	2	1	1000	115	imputed	17	0,1	1,2	-0,698463978366325	3,47362416386066	-0,862381846356546	NA	NA	NA	NA	NA	NA	NA	NA	NA	NA	NA	NA	Male	0,505939123979212	T2	4,82047141796585	-6,43789903489235	0,306384558277654	juni	6	6	Weekend	Saturday	89	16,6020786933927	0	PA_SNI	PA_SNI
34	primary	old	103	PA_SNI	341	1	12	0	5	2018-03-13	4	1	9673	22	observed	5,6	0	7,6	-2,02363285715646	4,3	-0,0360060102172026	3	6	6	6	6	6	6	6	6	6	95	5,75	Female	0,505939123979212	T1	-6,57952858203415	-6,53789903489235	6,70638455827765	maart	3	2	Week	Tuesday	92	19,6020786933927	0	PA_SNI	PA_SNI
34	primary	old	103	PA_SNI	340	0	12	0	5	2018-03-12	3	1	1000	0	imputed	10,3	2,6	1,8	-0,698463978366325	3,47362416386066	-0,862381846356546	NA	NA	NA	NA	NA	NA	NA	NA	NA	NA	NA	NA	Male	0,505939123979212	T1	-1,87952858203415	-3,93789903489235	0,906384558277654	maart	3	1	Week	Monday	85	12,6020786933927	0	PA_SNI	PA_SNI
34	primary	old	103	PA_SNI	340	0	12	0	7	2018-06-29	1	1	3851	77	imputed	19,5	15,3	0	-0,698463978366325	3,47362416386066	-0,862381846356546	NA	NA	NA	NA	NA	NA	NA	NA	NA	NA	NA	NA	Male	0,505939123979212	T3	7,32047141796585	8,76210096510765	-0,893615441722346	juni	6	5	Week	Friday	66	-6,39792130660727	0	PA_SNI	PA_SNI
34	primary	old	103	PA_SNI	340	0	12	0	7	2018-06-30	2	1	3667	96	imputed	21,3	15,3	0	-0,698463978366325	3,47362416386066	-0,862381846356546	NA	NA	NA	NA	NA	NA	NA	NA	NA	NA	NA	NA	Male	0,505939123979212	T3	9,12047141796585	8,76210096510765	-0,893615441722346	juni	6	6	Weekend	Saturday	51	-21,3979213066073	0	PA_SNI	PA_SNI
34	primary	old	103	PA_SNI	339	0	12	0	7	2018-06-29	1	1	4026	85	imputed	19,5	15,3	0	0,469036834449826	4,78512862276547	0,449122612548267	NA	NA	NA	NA	NA	NA	NA	NA	NA	NA	NA	NA	Male	0,505939123979212	T3	7,32047141796585	8,76210096510765	-0,893615441722346	juni	6	5	Week	Friday	66	-6,39792130660727	0	PA_SNI	PA_SNI
34	primary	old	103	PA_SNI	341	1	12	0	5	2018-03-11	2	1	7100	26	observed	10,2	2,5	1	-2,02363285715646	4,3	-0,0360060102172026	3	6	6	6	6	6	6	6	6	6	95	5,75	Female	0,505939123979212	T1	-1,97952858203415	-4,03789903489235	0,106384558277654	maart	3	0	Weekend	Sunday	91	18,6020786933927	0	PA_SNI	PA_SNI
34	primary	old	103	PA_SNI	339	0	12	0	6	2018-06-03	3	1	5782	135	imputed	19,3	4,6	0	0,469036834449826	4,78512862276547	0,449122612548267	NA	NA	NA	NA	NA	NA	NA	NA	NA	NA	NA	NA	Male	0,505939123979212	T2	7,12047141796585	-1,93789903489235	-0,893615441722346	juni	6	0	Weekend	Sunday	79	6,60207869339273	0	PA_SNI	PA_SNI
34	primary	old	103	PA_SNI	339	0	12	0	7	2018-06-30	2	1	12990	26	imputed	21,3	15,3	0	0,469036834449826	4,78512862276547	0,449122612548267	NA	NA	NA	NA	NA	NA	NA	NA	NA	NA	NA	NA	Male	0,505939123979212	T3	9,12047141796585	8,76210096510765	-0,893615441722346	juni	6	6	Weekend	Saturday	51	-21,3979213066073	0	PA_SNI	PA_SNI
34	primary	old	103	PA_SNI	350	0	11	0	7	2018-07-01	3	1	25718	40	imputed	21,3	15,3	0	0,0870521786891658	4,1	-0,236006010217203	NA	NA	NA	NA	NA	NA	NA	NA	NA	NA	NA	NA	Male	-0,494060876020788	T3	9,12047141796585	8,76210096510765	-0,893615441722346	juli	7	0	Weekend	Sunday	36	-36,3979213066073	0	PA_SNI	PA_SNI
34	primary	old	103	PA_SNI	2929	1	12	0	5	2018-03-10	1	1	4471	21	observed	11,4	1,8	6,6	0,463272695373057	3,8	-0,536006010217203	2	3	4	5,5	6	5	1	6	5	5,5	100	6	Female	0,505939123979212	T1	-0,77952858203415	-4,73789903489235	5,70638455827765	maart	3	6	Weekend	Saturday	89	16,6020786933927	0	PA_SNI	PA_SNI
34	primary	old	103	PA_SNI	341	1	12	0	6	2018-06-02	2	1	5378	0	observed	17	0,1	1,2	-2,02363285715646	4,3	-0,0360060102172026	NA	NA	NA	NA	NA	NA	NA	5	5	5	85	5,25	Female	0,505939123979212	T2	4,82047141796585	-6,43789903489235	0,306384558277654	juni	6	6	Weekend	Saturday	89	16,6020786933927	0	PA_SNI	PA_SNI
34	primary	old	103	PA_SNI	350	0	11	0	7	2018-06-29	1	1	26016	26	imputed	19,5	15,3	0	0,0870521786891658	4,1	-0,236006010217203	NA	NA	NA	NA	NA	NA	NA	NA	NA	NA	NA	NA	Male	-0,494060876020788	T3	7,32047141796585	8,76210096510765	-0,893615441722346	juni	6	5	Week	Friday	66	-6,39792130660727	0	PA_SNI	PA_SNI
34	primary	old	103	PA_SNI	341	1	12	0	7	2018-06-29	1	1	9492	53	imputed	19,5	15,3	0	-2,02363285715646	4,3	-0,0360060102172026	NA	NA	NA	NA	NA	NA	NA	NA	NA	NA	NA	NA	Female	0,505939123979212	T3	7,32047141796585	8,76210096510765	-0,893615441722346	juni	6	5	Week	Friday	66	-6,39792130660727	0	PA_SNI	PA_SNI
34	primary	old	103	PA_SNI	341	1	12	0	7	2018-07-01	3	1	12363	80	imputed	21,3	15,3	0	-2,02363285715646	4,3	-0,0360060102172026	NA	NA	NA	NA	NA	NA	NA	NA	NA	NA	NA	NA	Female	0,505939123979212	T3	9,12047141796585	8,76210096510765	-0,893615441722346	juli	7	0	Weekend	Sunday	36	-36,3979213066073	0	PA_SNI	PA_SNI
34	primary	old	103	PA_SNI	2929	1	12	0	6	2018-06-03	3	1	6656	5	imputed	19,3	4,6	0	0,463272695373057	3,8	-0,536006010217203	6	5	7	5,5	5,33	6	3,33	5	5	5	68	4,4	Female	0,505939123979212	T2	7,12047141796585	-1,93789903489235	-0,893615441722346	juni	6	0	Weekend	Sunday	79	6,60207869339273	0	PA_SNI	PA_SNI
34	primary	old	103	PA_SNI	341	1	12	0	6	2018-06-01	1	1	14212	59	observed	17,6	1,2	1,5	-2,02363285715646	4,3	-0,0360060102172026	NA	NA	NA	NA	NA	NA	NA	5	5	5	85	5,25	Female	0,505939123979212	T2	5,42047141796585	-5,33789903489235	0,606384558277654	juni	6	5	Week	Friday	90	17,6020786933927	0	PA_SNI	PA_SNI
34	primary	old	103	PA_SNI	342	1	11	0	5	2018-03-13	4	1	5686	8	observed	5,6	0	7,6	-1,89242145172206	4,5	0,163993989782798	1	1	2	5	5,67	1,67	1	2	4	3	88	5,4	Female	-0,494060876020788	T1	-6,57952858203415	-6,53789903489235	6,70638455827765	maart	3	2	Week	Tuesday	92	19,6020786933927	0	PA_SNI	PA_SNI
34	primary	old	103	PA_SNI	342	1	11	0	5	2018-03-11	2	1	6115	28	observed	10,2	2,5	1	-1,89242145172206	4,5	0,163993989782798	1	1	2	5	5,67	1,67	1	2	4	3	88	5,4	Female	-0,494060876020788	T1	-1,97952858203415	-4,03789903489235	0,106384558277654	maart	3	0	Weekend	Sunday	91	18,6020786933927	0	PA_SNI	PA_SNI
34	primary	old	103	PA_SNI	339	0	12	0	7	2018-07-01	3	1	11845	17	imputed	21,3	15,3	0	0,469036834449826	4,78512862276547	0,449122612548267	NA	NA	NA	NA	NA	NA	NA	NA	NA	NA	NA	NA	Male	0,505939123979212	T3	9,12047141796585	8,76210096510765	-0,893615441722346	juli	7	0	Weekend	Sunday	36	-36,3979213066073	0	PA_SNI	PA_SNI
34	primary	old	103	PA_SNI	2929	1	12	0	7	2018-07-01	3	1	1000	0	imputed	21,3	15,3	0	0,463272695373057	3,8	-0,536006010217203	3	6	5	5	4,67	6	5,67	5	2	3,5	65	4,25	Female	0,505939123979212	T3	9,12047141796585	8,76210096510765	-0,893615441722346	juli	7	0	Weekend	Sunday	36	-36,3979213066073	0	PA_SNI	PA_SNI
34	primary	old	103	PA_SNI	352	1	11	0	5	2018-03-10	1	1	6306	0	observed	11,4	1,8	6,6	-0,0928355181878055	2,87100043927714	-1,46500557094006	5	3	3	5	6	1	1	6	6	6	100	6	Female	-0,494060876020788	T1	-0,77952858203415	-4,73789903489235	5,70638455827765	maart	3	6	Weekend	Saturday	89	16,6020786933927	0	PA_SNI	PA_SNI
34	primary	old	103	PA_SNI	352	1	11	0	6	2018-06-03	3	1	9418	62	imputed	19,3	4,6	0	-0,0928355181878055	2,87100043927714	-1,46500557094006	NA	NA	NA	NA	NA	NA	NA	NA	NA	NA	100	6	Female	-0,494060876020788	T2	7,12047141796585	-1,93789903489235	-0,893615441722346	juni	6	0	Weekend	Sunday	79	6,60207869339273	0	PA_SNI	PA_SNI
34	primary	old	103	PA_SNI	352	1	11	0	6	2018-06-01	1	1	4038	20	imputed	17,6	1,2	1,5	-0,0928355181878055	2,87100043927714	-1,46500557094006	NA	NA	NA	NA	NA	NA	NA	NA	NA	NA	100	6	Female	-0,494060876020788	T2	5,42047141796585	-5,33789903489235	0,606384558277654	juni	6	5	Week	Friday	90	17,6020786933927	0	PA_SNI	PA_SNI
34	primary	old	103	PA_SNI	347	0	11	0	5	2018-03-10	1	1	8778	36	imputed	11,4	1,8	6,6	-0,484796390011347	3,6	-0,736006010217202	NA	NA	NA	NA	NA	NA	NA	NA	NA	NA	100	6	Male	-0,494060876020788	T1	-0,77952858203415	-4,73789903489235	5,70638455827765	maart	3	6	Weekend	Saturday	89	16,6020786933927	0	PA_SNI	PA_SNI
34	primary	old	103	PA_SNI	347	0	11	0	5	2018-03-11	2	1	15576	55	imputed	10,2	2,5	1	-0,484796390011347	3,6	-0,736006010217202	NA	NA	NA	NA	NA	NA	NA	NA	NA	NA	100	6	Male	-0,494060876020788	T1	-1,97952858203415	-4,03789903489235	0,106384558277654	maart	3	0	Weekend	Sunday	91	18,6020786933927	0	PA_SNI	PA_SNI
34	primary	old	103	PA_SNI	347	0	11	0	5	2018-03-12	3	1	11236	96	imputed	10,3	2,6	1,8	-0,484796390011347	3,6	-0,736006010217202	NA	NA	NA	NA	NA	NA	NA	NA	NA	NA	100	6	Male	-0,494060876020788	T1	-1,87952858203415	-3,93789903489235	0,906384558277654	maart	3	1	Week	Monday	85	12,6020786933927	0	PA_SNI	PA_SNI
34	primary	old	103	PA_SNI	343	1	11	0	5	2018-03-12	3	1	1000	0	imputed	10,3	2,6	1,8	2,37637348212247	3,4	-0,936006010217203	6	4	5	5	5	5	5	5	5	5	79	4,95	Female	-0,494060876020788	T1	-1,87952858203415	-3,93789903489235	0,906384558277654	maart	3	1	Week	Monday	85	12,6020786933927	0	PA_SNI	PA_SNI
34	primary	old	103	PA_SNI	343	1	12	0	6	2018-06-03	3	1	1009	0	imputed	19,3	4,6	0	2,37637348212247	3,4	-0,936006010217203	NA	NA	NA	NA	NA	NA	NA	4	4	4	92	5,6	Female	0,505939123979212	T2	7,12047141796585	-1,93789903489235	-0,893615441722346	juni	6	0	Weekend	Sunday	79	6,60207869339273	0	PA_SNI	PA_SNI
34	primary	old	103	PA_SNI	339	0	12	0	6	2018-06-02	2	1	2051	96	imputed	17	0,1	1,2	0,469036834449826	4,78512862276547	0,449122612548267	NA	NA	NA	NA	NA	NA	NA	NA	NA	NA	NA	NA	Male	0,505939123979212	T2	4,82047141796585	-6,43789903489235	0,306384558277654	juni	6	6	Weekend	Saturday	89	16,6020786933927	0	PA_SNI	PA_SNI
34	primary	old	103	PA_SNI	343	1	12	0	6	2018-06-02	2	1	4269	18	imputed	17	0,1	1,2	2,37637348212247	3,4	-0,936006010217203	NA	NA	NA	NA	NA	NA	NA	4	4	4	92	5,6	Female	0,505939123979212	T2	4,82047141796585	-6,43789903489235	0,306384558277654	juni	6	6	Weekend	Saturday	89	16,6020786933927	0	PA_SNI	PA_SNI
34	primary	old	103	PA_SNI	343	1	12	0	7	2018-06-29	1	1	3301	0	imputed	19,5	15,3	0	2,37637348212247	3,4	-0,936006010217203	NA	NA	NA	NA	NA	NA	NA	NA	NA	NA	NA	NA	Female	0,505939123979212	T3	7,32047141796585	8,76210096510765	-0,893615441722346	juni	6	5	Week	Friday	66	-6,39792130660727	0	PA_SNI	PA_SNI
34	primary	old	103	PA_SNI	343	1	12	0	7	2018-07-01	3	1	1614	14	imputed	21,3	15,3	0	2,37637348212247	3,4	-0,936006010217203	NA	NA	NA	NA	NA	NA	NA	NA	NA	NA	NA	NA	Female	0,505939123979212	T3	9,12047141796585	8,76210096510765	-0,893615441722346	juli	7	0	Weekend	Sunday	36	-36,3979213066073	0	PA_SNI	PA_SNI
34	primary	old	103	PA_SNI	343	1	12	0	7	2018-06-30	2	1	1000	0	imputed	21,3	15,3	0	2,37637348212247	3,4	-0,936006010217203	NA	NA	NA	NA	NA	NA	NA	NA	NA	NA	NA	NA	Female	0,505939123979212	T3	9,12047141796585	8,76210096510765	-0,893615441722346	juni	6	6	Weekend	Saturday	51	-21,3979213066073	0	PA_SNI	PA_SNI
34	primary	old	103	PA_SNI	340	0	12	0	5	2018-03-11	2	1	14742	150	imputed	10,2	2,5	1	-0,698463978366325	3,47362416386066	-0,862381846356546	NA	NA	NA	NA	NA	NA	NA	NA	NA	NA	NA	NA	Male	0,505939123979212	T1	-1,97952858203415	-4,03789903489235	0,106384558277654	maart	3	0	Weekend	Sunday	91	18,6020786933927	0	PA_SNI	PA_SNI
34	primary	old	103	PA_SNI	340	0	12	0	5	2018-03-14	5	1	1737	0	observed	5,8	9,4	0	-0,698463978366325	3,47362416386066	-0,862381846356546	NA	NA	NA	NA	NA	NA	NA	NA	NA	NA	NA	NA	Male	0,505939123979212	T1	-6,37952858203415	2,86210096510765	-0,893615441722346	maart	3	3	Week	Wednesday	80	7,60207869339273	0	PA_SNI	PA_SNI
34	primary	old	103	PA_SNI	340	0	12	0	5	2018-03-10	1	1	16119	120	imputed	11,4	1,8	6,6	-0,698463978366325	3,47362416386066	-0,862381846356546	NA	NA	NA	NA	NA	NA	NA	NA	NA	NA	NA	NA	Male	0,505939123979212	T1	-0,77952858203415	-4,73789903489235	5,70638455827765	maart	3	6	Weekend	Saturday	89	16,6020786933927	0	PA_SNI	PA_SNI
34	primary	old	103	PA_SNI	344	1	11	1	5	2018-03-10	1	1	3724	10	observed	11,4	1,8	6,6	-0,0751978081860919	5,1	0,763993989782797	4	4	3	5	5	1	1	6	6	6	88	5,4	Female	-0,494060876020788	T1	-0,77952858203415	-4,73789903489235	5,70638455827765	maart	3	6	Weekend	Saturday	89	16,6020786933927	0	PA_SNI	PA_SNI
34	primary	old	103	PA_SNI	344	1	11	1	6	2018-06-04	4	1	23626	194	observed	18,2	4,9	0	-0,0751978081860919	5,1	0,763993989782797	5	5	5	6	6	1	1	6	6	6	84	5,2	Female	-0,494060876020788	T2	6,02047141796585	-1,63789903489235	-0,893615441722346	juni	6	1	Week	Monday	82	9,60207869339273	0	PA_SNI	PA_SNI
34	primary	old	103	PA_SNI	348	0	11	0	6	2018-06-02	2	1	11877	80	imputed	17	0,1	1,2	1,79684451334136	4,72602248181474	0,390016471597537	NA	NA	NA	NA	NA	NA	NA	NA	NA	NA	NA	NA	Male	-0,494060876020788	T2	4,82047141796585	-6,43789903489235	0,306384558277654	juni	6	6	Weekend	Saturday	89	16,6020786933927	0	PA_SNI	PA_SNI
34	primary	old	103	PA_SNI	344	1	11	1	6	2018-06-02	2	1	10793	18	observed	17	0,1	1,2	-0,0751978081860919	5,1	0,763993989782797	5	5	5	6	6	1	1	6	6	6	84	5,2	Female	-0,494060876020788	T2	4,82047141796585	-6,43789903489235	0,306384558277654	juni	6	6	Weekend	Saturday	89	16,6020786933927	0	PA_SNI	PA_SNI
34	primary	old	103	PA_SNI	344	1	11	1	6	2018-06-03	3	1	4176	20	observed	19,3	4,6	0	-0,0751978081860919	5,1	0,763993989782797	5	5	5	6	6	1	1	6	6	6	84	5,2	Female	-0,494060876020788	T2	7,12047141796585	-1,93789903489235	-0,893615441722346	juni	6	0	Weekend	Sunday	79	6,60207869339273	0	PA_SNI	PA_SNI
34	primary	old	103	PA_SNI	344	1	11	1	6	2018-06-01	1	1	10787	10	observed	17,6	1,2	1,5	-0,0751978081860919	5,1	0,763993989782797	5	5	5	6	6	1	1	6	6	6	84	5,2	Female	-0,494060876020788	T2	5,42047141796585	-5,33789903489235	0,606384558277654	juni	6	5	Week	Friday	90	17,6020786933927	0	PA_SNI	PA_SNI
34	primary	old	103	PA_SNI	341	1	12	0	5	2018-03-10	1	1	6406	0	observed	11,4	1,8	6,6	-2,02363285715646	4,3	-0,0360060102172026	3	6	6	6	6	6	6	6	6	6	95	5,75	Female	0,505939123979212	T1	-0,77952858203415	-4,73789903489235	5,70638455827765	maart	3	6	Weekend	Saturday	89	16,6020786933927	0	PA_SNI	PA_SNI
34	primary	old	103	PA_SNI	341	1	12	0	5	2018-03-14	5	1	14624	88	observed	5,8	9,4	0	-2,02363285715646	4,3	-0,0360060102172026	3	6	6	6	6	6	6	6	6	6	95	5,75	Female	0,505939123979212	T1	-6,37952858203415	2,86210096510765	-0,893615441722346	maart	3	3	Week	Wednesday	80	7,60207869339273	0	PA_SNI	PA_SNI
34	primary	old	103	PA_SNI	341	1	12	0	5	2018-03-12	3	1	11977	47	observed	10,3	2,6	1,8	-2,02363285715646	4,3	-0,0360060102172026	3	6	6	6	6	6	6	6	6	6	95	5,75	Female	0,505939123979212	T1	-1,87952858203415	-3,93789903489235	0,906384558277654	maart	3	1	Week	Monday	85	12,6020786933927	0	PA_SNI	PA_SNI
34	primary	old	103	PA_SNI	341	1	12	0	6	2018-06-03	3	1	4885	27	observed	19,3	4,6	0	-2,02363285715646	4,3	-0,0360060102172026	NA	NA	NA	NA	NA	NA	NA	5	5	5	85	5,25	Female	0,505939123979212	T2	7,12047141796585	-1,93789903489235	-0,893615441722346	juni	6	0	Weekend	Sunday	79	6,60207869339273	0	PA_SNI	PA_SNI
34	primary	old	103	PA_SNI	345	0	12	1	5	2018-03-10	1	1	13597	78	observed	11,4	1,8	6,6	0,852236442630897	4,89312868844266	0,557122678225461	NA	NA	NA	NA	NA	NA	NA	NA	NA	NA	74	4,7	Male	0,505939123979212	T1	-0,77952858203415	-4,73789903489235	5,70638455827765	maart	3	6	Weekend	Saturday	89	16,6020786933927	0	PA_SNI	PA_SNI
34	primary	old	103	PA_SNI	345	0	12	1	5	2018-03-11	2	1	3302	0	observed	10,2	2,5	1	0,852236442630897	4,89312868844266	0,557122678225461	NA	NA	NA	NA	NA	NA	NA	NA	NA	NA	74	4,7	Male	0,505939123979212	T1	-1,97952858203415	-4,03789903489235	0,106384558277654	maart	3	0	Weekend	Sunday	91	18,6020786933927	0	PA_SNI	PA_SNI
34	primary	old	103	PA_SNI	345	0	12	1	6	2018-06-03	3	1	10887	37	imputed	19,3	4,6	0	0,852236442630897	4,89312868844266	0,557122678225461	NA	NA	NA	NA	NA	NA	NA	NA	NA	NA	NA	NA	Male	0,505939123979212	T2	7,12047141796585	-1,93789903489235	-0,893615441722346	juni	6	0	Weekend	Sunday	79	6,60207869339273	0	PA_SNI	PA_SNI
34	primary	old	103	PA_SNI	345	0	12	1	6	2018-06-01	1	1	1000	101	imputed	17,6	1,2	1,5	0,852236442630897	4,89312868844266	0,557122678225461	NA	NA	NA	NA	NA	NA	NA	NA	NA	NA	NA	NA	Male	0,505939123979212	T2	5,42047141796585	-5,33789903489235	0,606384558277654	juni	6	5	Week	Friday	90	17,6020786933927	0	PA_SNI	PA_SNI
34	primary	old	103	PA_SNI	2929	1	12	0	5	2018-03-11	2	1	1178	0	observed	10,2	2,5	1	0,463272695373057	3,8	-0,536006010217203	2	3	4	5,5	6	5	1	6	5	5,5	100	6	Female	0,505939123979212	T1	-1,97952858203415	-4,03789903489235	0,106384558277654	maart	3	0	Weekend	Sunday	91	18,6020786933927	0	PA_SNI	PA_SNI
34	primary	old	103	PA_SNI	2929	1	12	0	5	2018-03-12	3	1	1780	0	observed	10,3	2,6	1,8	0,463272695373057	3,8	-0,536006010217203	2	3	4	5,5	6	5	1	6	5	5,5	100	6	Female	0,505939123979212	T1	-1,87952858203415	-3,93789903489235	0,906384558277654	maart	3	1	Week	Monday	85	12,6020786933927	0	PA_SNI	PA_SNI
34	primary	old	103	PA_SNI	2929	1	12	0	6	2018-06-01	1	1	3980	9	observed	17,6	1,2	1,5	0,463272695373057	3,8	-0,536006010217203	6	5	7	5,5	5,33	6	3,33	5	5	5	68	4,4	Female	0,505939123979212	T2	5,42047141796585	-5,33789903489235	0,606384558277654	juni	6	5	Week	Friday	90	17,6020786933927	0	PA_SNI	PA_SNI
34	primary	old	103	PA_SNI	2929	1	12	0	6	2018-06-02	2	1	2056	17	observed	17	0,1	1,2	0,463272695373057	3,8	-0,536006010217203	6	5	7	5,5	5,33	6	3,33	5	5	5	68	4,4	Female	0,505939123979212	T2	4,82047141796585	-6,43789903489235	0,306384558277654	juni	6	6	Weekend	Saturday	89	16,6020786933927	0	PA_SNI	PA_SNI
34	primary	old	103	PA_SNI	346	0	11	0	5	2018-03-11	2	1	7694	16	observed	10,2	2,5	1	2,16942527895243	3,2	-1,1360060102172	3	4	3	4,5	5	2	1	5	5	5	69	4,45	Male	-0,494060876020788	T1	-1,97952858203415	-4,03789903489235	0,106384558277654	maart	3	0	Weekend	Sunday	91	18,6020786933927	0	PA_SNI	PA_SNI
34	primary	old	103	PA_SNI	346	0	11	0	5	2018-03-14	5	1	10364	74	observed	5,8	9,4	0	2,16942527895243	3,2	-1,1360060102172	3	4	3	4,5	5	2	1	5	5	5	69	4,45	Male	-0,494060876020788	T1	-6,37952858203415	2,86210096510765	-0,893615441722346	maart	3	3	Week	Wednesday	80	7,60207869339273	0	PA_SNI	PA_SNI
34	primary	old	103	PA_SNI	2929	1	12	0	7	2018-06-29	1	1	1000	0	imputed	19,5	15,3	0	0,463272695373057	3,8	-0,536006010217203	3	6	5	5	4,67	6	5,67	5	2	3,5	65	4,25	Female	0,505939123979212	T3	7,32047141796585	8,76210096510765	-0,893615441722346	juni	6	5	Week	Friday	66	-6,39792130660727	0	PA_SNI	PA_SNI
34	primary	old	103	PA_SNI	2929	1	12	0	7	2018-06-30	2	1	1000	0	imputed	21,3	15,3	0	0,463272695373057	3,8	-0,536006010217203	3	6	5	5	4,67	6	5,67	5	2	3,5	65	4,25	Female	0,505939123979212	T3	9,12047141796585	8,76210096510765	-0,893615441722346	juni	6	6	Weekend	Saturday	51	-21,3979213066073	0	PA_SNI	PA_SNI
34	primary	old	103	PA_SNI	351	0	13	0	7	2018-07-01	3	1	2788	18	observed	21,3	15,3	0	-0,742343378304728	4,26316248340505	-0,0728435268121572	NA	NA	NA	NA	NA	NA	NA	NA	NA	NA	NA	NA	Male	1,50593912397921	T3	9,12047141796585	8,76210096510765	-0,893615441722346	juli	7	0	Weekend	Sunday	36	-36,3979213066073	0	PA_SNI	PA_SNI
34	primary	old	103	PA_SNI	342	1	11	0	6	2018-06-02	2	1	10456	0	imputed	17	0,1	1,2	-1,89242145172206	4,5	0,163993989782798	3	2	2	5	5,33	1	1	2	4	3	79	4,95	Female	-0,494060876020788	T2	4,82047141796585	-6,43789903489235	0,306384558277654	juni	6	6	Weekend	Saturday	89	16,6020786933927	0	PA_SNI	PA_SNI
34	primary	old	103	PA_SNI	342	1	11	0	6	2018-06-03	3	1	4507	0	imputed	19,3	4,6	0	-1,89242145172206	4,5	0,163993989782798	3	2	2	5	5,33	1	1	2	4	3	79	4,95	Female	-0,494060876020788	T2	7,12047141796585	-1,93789903489235	-0,893615441722346	juni	6	0	Weekend	Sunday	79	6,60207869339273	0	PA_SNI	PA_SNI
34	primary	old	103	PA_SNI	342	1	11	0	6	2018-06-01	1	1	4300	0	observed	17,6	1,2	1,5	-1,89242145172206	4,5	0,163993989782798	3	2	2	5	5,33	1	1	2	4	3	79	4,95	Female	-0,494060876020788	T2	5,42047141796585	-5,33789903489235	0,606384558277654	juni	6	5	Week	Friday	90	17,6020786933927	0	PA_SNI	PA_SNI
34	primary	old	103	PA_SNI	342	1	11	0	7	2018-07-01	3	1	7439	70	imputed	21,3	15,3	0	-1,89242145172206	4,5	0,163993989782798	NA	NA	NA	NA	NA	NA	NA	NA	NA	NA	76	4,8	Female	-0,494060876020788	T3	9,12047141796585	8,76210096510765	-0,893615441722346	juli	7	0	Weekend	Sunday	36	-36,3979213066073	0	PA_SNI	PA_SNI
34	primary	old	103	PA_SNI	339	0	12	0	5	2018-03-10	1	1	2819	75	imputed	11,4	1,8	6,6	0,469036834449826	4,78512862276547	0,449122612548267	4	4	4	4	4	4	4	5	5	5	58	3,9	Male	0,505939123979212	T1	-0,77952858203415	-4,73789903489235	5,70638455827765	maart	3	6	Weekend	Saturday	89	16,6020786933927	0	PA_SNI	PA_SNI
34	primary	old	103	PA_SNI	352	1	11	0	6	2018-06-02	2	1	18873	26	imputed	17	0,1	1,2	-0,0928355181878055	2,87100043927714	-1,46500557094006	NA	NA	NA	NA	NA	NA	NA	NA	NA	NA	100	6	Female	-0,494060876020788	T2	4,82047141796585	-6,43789903489235	0,306384558277654	juni	6	6	Weekend	Saturday	89	16,6020786933927	0	PA_SNI	PA_SNI
34	primary	old	103	PA_SNI	352	1	11	0	7	2018-06-30	2	1	2096	79	imputed	21,3	15,3	0	-0,0928355181878055	2,87100043927714	-1,46500557094006	NA	NA	NA	NA	NA	NA	NA	NA	NA	NA	NA	NA	Female	-0,494060876020788	T3	9,12047141796585	8,76210096510765	-0,893615441722346	juni	6	6	Weekend	Saturday	51	-21,3979213066073	0	PA_SNI	PA_SNI
34	primary	old	103	PA_SNI	352	1	11	0	7	2018-07-01	3	1	7043	95	imputed	21,3	15,3	0	-0,0928355181878055	2,87100043927714	-1,46500557094006	NA	NA	NA	NA	NA	NA	NA	NA	NA	NA	NA	NA	Female	-0,494060876020788	T3	9,12047141796585	8,76210096510765	-0,893615441722346	juli	7	0	Weekend	Sunday	36	-36,3979213066073	0	PA_SNI	PA_SNI
34	primary	old	103	PA_SNI	352	1	11	0	7	2018-06-29	1	1	5771	103	imputed	19,5	15,3	0	-0,0928355181878055	2,87100043927714	-1,46500557094006	NA	NA	NA	NA	NA	NA	NA	NA	NA	NA	NA	NA	Female	-0,494060876020788	T3	7,32047141796585	8,76210096510765	-0,893615441722346	juni	6	5	Week	Friday	66	-6,39792130660727	0	PA_SNI	PA_SNI
34	primary	old	103	PA_SNI	343	1	12	0	6	2018-06-01	1	1	1897	76	imputed	17,6	1,2	1,5	2,37637348212247	3,4	-0,936006010217203	NA	NA	NA	NA	NA	NA	NA	4	4	4	92	5,6	Female	0,505939123979212	T2	5,42047141796585	-5,33789903489235	0,606384558277654	juni	6	5	Week	Friday	90	17,6020786933927	0	PA_SNI	PA_SNI
34	primary	old	103	PA_SNI	343	1	11	0	5	2018-03-11	2	1	2014	0	imputed	10,2	2,5	1	2,37637348212247	3,4	-0,936006010217203	6	4	5	5	5	5	5	5	5	5	79	4,95	Female	-0,494060876020788	T1	-1,97952858203415	-4,03789903489235	0,106384558277654	maart	3	0	Weekend	Sunday	91	18,6020786933927	0	PA_SNI	PA_SNI
34	primary	old	103	PA_SNI	347	0	12	0	7	2018-07-01	3	1	10671	47	imputed	21,3	15,3	0	-0,484796390011347	3,6	-0,736006010217202	3	7	3	3,5	3,33	3	3,33	2	3	2,5	22	2,1	Male	0,505939123979212	T3	9,12047141796585	8,76210096510765	-0,893615441722346	juli	7	0	Weekend	Sunday	36	-36,3979213066073	0	PA_SNI	PA_SNI
34	primary	old	103	PA_SNI	347	0	12	0	7	2018-06-30	2	1	9550	105	imputed	21,3	15,3	0	-0,484796390011347	3,6	-0,736006010217202	3	7	3	3,5	3,33	3	3,33	2	3	2,5	22	2,1	Male	0,505939123979212	T3	9,12047141796585	8,76210096510765	-0,893615441722346	juni	6	6	Weekend	Saturday	51	-21,3979213066073	0	PA_SNI	PA_SNI
34	primary	old	103	PA_SNI	347	0	12	0	7	2018-06-29	1	1	18495	22	imputed	19,5	15,3	0	-0,484796390011347	3,6	-0,736006010217202	3	7	3	3,5	3,33	3	3,33	2	3	2,5	22	2,1	Male	0,505939123979212	T3	7,32047141796585	8,76210096510765	-0,893615441722346	juni	6	5	Week	Friday	66	-6,39792130660727	0	PA_SNI	PA_SNI
34	primary	old	103	PA_SNI	344	1	11	1	5	2018-03-11	2	1	2166	0	observed	10,2	2,5	1	-0,0751978081860919	5,1	0,763993989782797	4	4	3	5	5	1	1	6	6	6	88	5,4	Female	-0,494060876020788	T1	-1,97952858203415	-4,03789903489235	0,106384558277654	maart	3	0	Weekend	Sunday	91	18,6020786933927	0	PA_SNI	PA_SNI
34	primary	old	103	PA_SNI	344	1	11	1	5	2018-03-14	5	1	4074	37	observed	5,8	9,4	0	-0,0751978081860919	5,1	0,763993989782797	4	4	3	5	5	1	1	6	6	6	88	5,4	Female	-0,494060876020788	T1	-6,37952858203415	2,86210096510765	-0,893615441722346	maart	3	3	Week	Wednesday	80	7,60207869339273	0	PA_SNI	PA_SNI
34	primary	old	103	PA_SNI	344	1	11	1	5	2018-03-12	3	1	4830	0	imputed	10,3	2,6	1,8	-0,0751978081860919	5,1	0,763993989782797	4	4	3	5	5	1	1	6	6	6	88	5,4	Female	-0,494060876020788	T1	-1,87952858203415	-3,93789903489235	0,906384558277654	maart	3	1	Week	Monday	85	12,6020786933927	0	PA_SNI	PA_SNI
34	primary	old	103	PA_SNI	348	0	11	0	5	2018-03-11	2	1	9358	97	imputed	10,2	2,5	1	1,79684451334136	4,72602248181474	0,390016471597537	NA	NA	NA	NA	NA	NA	NA	NA	NA	NA	NA	NA	Male	-0,494060876020788	T1	-1,97952858203415	-4,03789903489235	0,106384558277654	maart	3	0	Weekend	Sunday	91	18,6020786933927	0	PA_SNI	PA_SNI
34	primary	old	103	PA_SNI	348	0	11	0	6	2018-06-03	3	1	11694	64	imputed	19,3	4,6	0	1,79684451334136	4,72602248181474	0,390016471597537	NA	NA	NA	NA	NA	NA	NA	NA	NA	NA	NA	NA	Male	-0,494060876020788	T2	7,12047141796585	-1,93789903489235	-0,893615441722346	juni	6	0	Weekend	Sunday	79	6,60207869339273	0	PA_SNI	PA_SNI
34	primary	old	103	PA_SNI	345	0	12	1	7	2018-07-01	3	1	8720	0	imputed	21,3	15,3	0	0,852236442630897	4,89312868844266	0,557122678225461	NA	NA	NA	NA	NA	NA	NA	NA	NA	NA	NA	NA	Male	0,505939123979212	T3	9,12047141796585	8,76210096510765	-0,893615441722346	juli	7	0	Weekend	Sunday	36	-36,3979213066073	0	PA_SNI	PA_SNI
34	primary	old	103	PA_SNI	348	0	11	0	6	2018-06-01	1	1	2926	61	imputed	17,6	1,2	1,5	1,79684451334136	4,72602248181474	0,390016471597537	NA	NA	NA	NA	NA	NA	NA	NA	NA	NA	NA	NA	Male	-0,494060876020788	T2	5,42047141796585	-5,33789903489235	0,606384558277654	juni	6	5	Week	Friday	90	17,6020786933927	0	PA_SNI	PA_SNI
34	primary	old	103	PA_SNI	348	0	11	0	7	2018-07-01	3	0	7743	0	imputed	21,3	15,3	0	1,79684451334136	4,72602248181474	0,390016471597537	NA	NA	NA	NA	NA	NA	NA	NA	NA	NA	NA	NA	Male	-0,494060876020788	T3	9,12047141796585	8,76210096510765	-0,893615441722346	juli	7	0	Weekend	Sunday	36	-36,3979213066073	0	PA_SNI	PA_SNI
34	primary	old	103	PA_SNI	348	0	11	0	7	2018-06-29	1	0	4521	12	imputed	19,5	15,3	0	1,79684451334136	4,72602248181474	0,390016471597537	NA	NA	NA	NA	NA	NA	NA	NA	NA	NA	NA	NA	Male	-0,494060876020788	T3	7,32047141796585	8,76210096510765	-0,893615441722346	juni	6	5	Week	Friday	66	-6,39792130660727	0	PA_SNI	PA_SNI
34	primary	old	103	PA_SNI	344	1	12	1	7	2018-06-30	2	1	19389	101	imputed	21,3	15,3	0	-0,0751978081860919	5,1	0,763993989782797	NA	NA	NA	NA	NA	NA	NA	NA	NA	NA	85	5,25	Female	0,505939123979212	T3	9,12047141796585	8,76210096510765	-0,893615441722346	juni	6	6	Weekend	Saturday	51	-21,3979213066073	0	PA_SNI	PA_SNI
34	primary	old	103	PA_SNI	344	1	12	1	7	2018-07-01	3	1	11422	91	imputed	21,3	15,3	0	-0,0751978081860919	5,1	0,763993989782797	NA	NA	NA	NA	NA	NA	NA	NA	NA	NA	85	5,25	Female	0,505939123979212	T3	9,12047141796585	8,76210096510765	-0,893615441722346	juli	7	0	Weekend	Sunday	36	-36,3979213066073	0	PA_SNI	PA_SNI
34	primary	old	103	PA_SNI	344	1	12	1	7	2018-06-29	1	1	11358	87	imputed	19,5	15,3	0	-0,0751978081860919	5,1	0,763993989782797	NA	NA	NA	NA	NA	NA	NA	NA	NA	NA	85	5,25	Female	0,505939123979212	T3	7,32047141796585	8,76210096510765	-0,893615441722346	juni	6	5	Week	Friday	66	-6,39792130660727	0	PA_SNI	PA_SNI
34	primary	old	103	PA_SNI	345	0	12	1	5	2018-03-12	3	1	1303	0	observed	10,3	2,6	1,8	0,852236442630897	4,89312868844266	0,557122678225461	NA	NA	NA	NA	NA	NA	NA	NA	NA	NA	74	4,7	Male	0,505939123979212	T1	-1,87952858203415	-3,93789903489235	0,906384558277654	maart	3	1	Week	Monday	85	12,6020786933927	0	PA_SNI	PA_SNI
34	primary	old	103	PA_SNI	337	0	11	1	5	2018-03-10	1	1	21915	12	imputed	11,4	1,8	6,6	-0,340455388827224	4,49285377955147	0,156847769334264	7	5	5	6	5,67	3,67	1	6	6	6	94	5,7	Male	-0,494060876020788	T1	-0,77952858203415	-4,73789903489235	5,70638455827765	maart	3	6	Weekend	Saturday	89	16,6020786933927	0	PA_SNI	PA_SNI
34	primary	old	103	PA_SNI	337	0	11	1	5	2018-03-12	3	1	23501	122	imputed	10,3	2,6	1,8	-0,340455388827224	4,49285377955147	0,156847769334264	7	5	5	6	5,67	3,67	1	6	6	6	94	5,7	Male	-0,494060876020788	T1	-1,87952858203415	-3,93789903489235	0,906384558277654	maart	3	1	Week	Monday	85	12,6020786933927	0	PA_SNI	PA_SNI
34	primary	old	103	PA_SNI	337	0	11	1	5	2018-03-11	2	1	1000	52	imputed	10,2	2,5	1	-0,340455388827224	4,49285377955147	0,156847769334264	7	5	5	6	5,67	3,67	1	6	6	6	94	5,7	Male	-0,494060876020788	T1	-1,97952858203415	-4,03789903489235	0,106384558277654	maart	3	0	Weekend	Sunday	91	18,6020786933927	0	PA_SNI	PA_SNI
34	primary	old	103	PA_SNI	337	0	12	1	6	2018-06-01	1	1	3773	129	imputed	17,6	1,2	1,5	-0,340455388827224	4,49285377955147	0,156847769334264	NA	NA	NA	NA	NA	NA	NA	NA	NA	NA	NA	NA	Male	0,505939123979212	T2	5,42047141796585	-5,33789903489235	0,606384558277654	juni	6	5	Week	Friday	90	17,6020786933927	0	PA_SNI	PA_SNI
34	primary	old	103	PA_SNI	345	0	12	1	6	2018-06-02	2	1	5791	12	imputed	17	0,1	1,2	0,852236442630897	4,89312868844266	0,557122678225461	NA	NA	NA	NA	NA	NA	NA	NA	NA	NA	NA	NA	Male	0,505939123979212	T2	4,82047141796585	-6,43789903489235	0,306384558277654	juni	6	6	Weekend	Saturday	89	16,6020786933927	0	PA_SNI	PA_SNI
34	primary	old	103	PA_SNI	346	0	11	0	7	2018-06-29	1	1	12480	20	imputed	19,5	15,3	0	2,16942527895243	3,2	-1,1360060102172	NA	NA	NA	NA	NA	NA	NA	NA	NA	NA	NA	NA	Male	-0,494060876020788	T3	7,32047141796585	8,76210096510765	-0,893615441722346	juni	6	5	Week	Friday	66	-6,39792130660727	0	PA_SNI	PA_SNI
34	primary	old	103	PA_SNI	345	0	12	1	7	2018-06-29	1	1	8664	0	imputed	19,5	15,3	0	0,852236442630897	4,89312868844266	0,557122678225461	NA	NA	NA	NA	NA	NA	NA	NA	NA	NA	NA	NA	Male	0,505939123979212	T3	7,32047141796585	8,76210096510765	-0,893615441722346	juni	6	5	Week	Friday	66	-6,39792130660727	0	PA_SNI	PA_SNI
34	primary	old	103	PA_SNI	345	0	12	1	7	2018-06-30	2	1	14077	55	imputed	21,3	15,3	0	0,852236442630897	4,89312868844266	0,557122678225461	NA	NA	NA	NA	NA	NA	NA	NA	NA	NA	NA	NA	Male	0,505939123979212	T3	9,12047141796585	8,76210096510765	-0,893615441722346	juni	6	6	Weekend	Saturday	51	-21,3979213066073	0	PA_SNI	PA_SNI
34	primary	old	103	PA_SNI	337	0	12	1	7	2018-06-29	1	1	7788	20	imputed	19,5	15,3	0	-0,340455388827224	4,49285377955147	0,156847769334264	NA	NA	NA	NA	NA	NA	NA	NA	NA	NA	NA	NA	Male	0,505939123979212	T3	7,32047141796585	8,76210096510765	-0,893615441722346	juni	6	5	Week	Friday	66	-6,39792130660727	0	PA_SNI	PA_SNI
34	primary	old	103	PA_SNI	338	0	11	0	5	2018-03-11	2	0	1638	42	imputed	10,2	2,5	1	1,00730731709621	4,1215620712453	-0,214443938971904	NA	NA	NA	NA	NA	NA	NA	NA	NA	NA	NA	NA	Male	-0,494060876020788	T1	-1,97952858203415	-4,03789903489235	0,106384558277654	maart	3	0	Weekend	Sunday	91	18,6020786933927	0	PA_SNI	PA_SNI
34	primary	old	103	PA_SNI	338	0	11	0	5	2018-03-10	1	0	7359	8	imputed	11,4	1,8	6,6	1,00730731709621	4,1215620712453	-0,214443938971904	NA	NA	NA	NA	NA	NA	NA	NA	NA	NA	NA	NA	Male	-0,494060876020788	T1	-0,77952858203415	-4,73789903489235	5,70638455827765	maart	3	6	Weekend	Saturday	89	16,6020786933927	0	PA_SNI	PA_SNI
34	primary	old	103	PA_SNI	338	0	11	0	5	2018-03-12	3	0	5714	25	imputed	10,3	2,6	1,8	1,00730731709621	4,1215620712453	-0,214443938971904	NA	NA	NA	NA	NA	NA	NA	NA	NA	NA	NA	NA	Male	-0,494060876020788	T1	-1,87952858203415	-3,93789903489235	0,906384558277654	maart	3	1	Week	Monday	85	12,6020786933927	0	PA_SNI	PA_SNI
34	primary	old	103	PA_SNI	338	0	12	0	6	2018-06-01	1	0	15093	13	imputed	17,6	1,2	1,5	1,00730731709621	4,1215620712453	-0,214443938971904	NA	NA	NA	NA	NA	NA	NA	NA	NA	NA	NA	NA	Male	0,505939123979212	T2	5,42047141796585	-5,33789903489235	0,606384558277654	juni	6	5	Week	Friday	90	17,6020786933927	0	PA_SNI	PA_SNI
34	primary	old	103	PA_SNI	352	1	11	0	5	2018-03-12	3	1	8210	61	imputed	10,3	2,6	1,8	-0,0928355181878055	2,87100043927714	-1,46500557094006	5	3	3	5	6	1	1	6	6	6	100	6	Female	-0,494060876020788	T1	-1,87952858203415	-3,93789903489235	0,906384558277654	maart	3	1	Week	Monday	85	12,6020786933927	0	PA_SNI	PA_SNI
34	primary	old	103	PA_SNI	352	1	11	0	5	2018-03-11	2	1	4981	0	observed	10,2	2,5	1	-0,0928355181878055	2,87100043927714	-1,46500557094006	5	3	3	5	6	1	1	6	6	6	100	6	Female	-0,494060876020788	T1	-1,97952858203415	-4,03789903489235	0,106384558277654	maart	3	0	Weekend	Sunday	91	18,6020786933927	0	PA_SNI	PA_SNI
34	primary	old	103	PA_SNI	338	0	12	0	7	2018-07-01	3	0	2852	0	imputed	21,3	15,3	0	1,00730731709621	4,1215620712453	-0,214443938971904	NA	NA	NA	NA	NA	NA	NA	NA	NA	NA	NA	NA	Male	0,505939123979212	T3	9,12047141796585	8,76210096510765	-0,893615441722346	juli	7	0	Weekend	Sunday	36	-36,3979213066073	0	PA_SNI	PA_SNI
34	primary	old	103	PA_SNI	338	0	12	0	7	2018-06-30	2	0	10411	86	imputed	21,3	15,3	0	1,00730731709621	4,1215620712453	-0,214443938971904	NA	NA	NA	NA	NA	NA	NA	NA	NA	NA	NA	NA	Male	0,505939123979212	T3	9,12047141796585	8,76210096510765	-0,893615441722346	juni	6	6	Weekend	Saturday	51	-21,3979213066073	0	PA_SNI	PA_SNI
34	primary	old	103	PA_SNI	346	0	11	0	7	2018-07-01	3	1	6943	25	imputed	21,3	15,3	0	2,16942527895243	3,2	-1,1360060102172	NA	NA	NA	NA	NA	NA	NA	NA	NA	NA	NA	NA	Male	-0,494060876020788	T3	9,12047141796585	8,76210096510765	-0,893615441722346	juli	7	0	Weekend	Sunday	36	-36,3979213066073	0	PA_SNI	PA_SNI
34	primary	old	103	PA_SNI	337	0	12	1	6	2018-06-03	3	1	1000	77	imputed	19,3	4,6	0	-0,340455388827224	4,49285377955147	0,156847769334264	NA	NA	NA	NA	NA	NA	NA	NA	NA	NA	NA	NA	Male	0,505939123979212	T2	7,12047141796585	-1,93789903489235	-0,893615441722346	juni	6	0	Weekend	Sunday	79	6,60207869339273	0	PA_SNI	PA_SNI
34	primary	old	103	PA_SNI	2875	1	11	0	5	2018-03-12	3	1	5619	0	imputed	10,3	2,6	1,8	0,376521120528399	4,45	0,113993989782798	7	7	0	5,5	6	1	1	6	4	5	86	5,3	Female	-0,494060876020788	T1	-1,87952858203415	-3,93789903489235	0,906384558277654	maart	3	1	Week	Monday	85	12,6020786933927	0	PA_SNI	PA_SNI
34	primary	old	103	PA_SNI	2875	1	11	0	5	2018-03-11	2	1	2450	4	imputed	10,2	2,5	1	0,376521120528399	4,45	0,113993989782798	7	7	0	5,5	6	1	1	6	4	5	86	5,3	Female	-0,494060876020788	T1	-1,97952858203415	-4,03789903489235	0,106384558277654	maart	3	0	Weekend	Sunday	91	18,6020786933927	0	PA_SNI	PA_SNI
34	primary	old	103	PA_SNI	347	0	12	0	6	2018-06-01	1	1	4705	43	imputed	17,6	1,2	1,5	-0,484796390011347	3,6	-0,736006010217202	NA	NA	NA	NA	NA	NA	NA	NA	NA	NA	80	5	Male	0,505939123979212	T2	5,42047141796585	-5,33789903489235	0,606384558277654	juni	6	5	Week	Friday	90	17,6020786933927	0	PA_SNI	PA_SNI
34	primary	old	103	PA_SNI	339	0	12	0	6	2018-06-01	1	1	8703	93	imputed	17,6	1,2	1,5	0,469036834449826	4,78512862276547	0,449122612548267	NA	NA	NA	NA	NA	NA	NA	NA	NA	NA	NA	NA	Male	0,505939123979212	T2	5,42047141796585	-5,33789903489235	0,606384558277654	juni	6	5	Week	Friday	90	17,6020786933927	0	PA_SNI	PA_SNI
34	primary	old	103	PA_SNI	347	0	12	0	6	2018-06-02	2	1	16426	84	imputed	17	0,1	1,2	-0,484796390011347	3,6	-0,736006010217202	NA	NA	NA	NA	NA	NA	NA	NA	NA	NA	80	5	Male	0,505939123979212	T2	4,82047141796585	-6,43789903489235	0,306384558277654	juni	6	6	Weekend	Saturday	89	16,6020786933927	0	PA_SNI	PA_SNI
34	primary	old	103	PA_SNI	2875	1	11	0	6	2018-06-03	3	1	3577	3	imputed	19,3	4,6	0	0,376521120528399	4,45	0,113993989782798	7	7	7	6	6	1	1	2	1	1,5	100	6	Female	-0,494060876020788	T2	7,12047141796585	-1,93789903489235	-0,893615441722346	juni	6	0	Weekend	Sunday	79	6,60207869339273	0	PA_SNI	PA_SNI
34	primary	old	103	PA_SNI	2875	1	11	0	6	2018-06-01	1	1	10614	4	imputed	17,6	1,2	1,5	0,376521120528399	4,45	0,113993989782798	7	7	7	6	6	1	1	2	1	1,5	100	6	Female	-0,494060876020788	T2	5,42047141796585	-5,33789903489235	0,606384558277654	juni	6	5	Week	Friday	90	17,6020786933927	0	PA_SNI	PA_SNI
34	primary	old	103	PA_SNI	2875	1	11	0	7	2018-06-29	1	1	7271	0	imputed	19,5	15,3	0	0,376521120528399	4,45	0,113993989782798	5	7	7	5,5	6	1	1	5	4	4,5	97	5,85	Female	-0,494060876020788	T3	7,32047141796585	8,76210096510765	-0,893615441722346	juni	6	5	Week	Friday	66	-6,39792130660727	0	PA_SNI	PA_SNI
34	primary	old	103	PA_SNI	2875	1	11	0	7	2018-07-01	3	1	8652	0	imputed	21,3	15,3	0	0,376521120528399	4,45	0,113993989782798	5	7	7	5,5	6	1	1	5	4	4,5	97	5,85	Female	-0,494060876020788	T3	9,12047141796585	8,76210096510765	-0,893615441722346	juli	7	0	Weekend	Sunday	36	-36,3979213066073	0	PA_SNI	PA_SNI
34	primary	old	103	PA_SNI	2875	1	11	0	7	2018-06-30	2	1	8658	0	imputed	21,3	15,3	0	0,376521120528399	4,45	0,113993989782798	5	7	7	5,5	6	1	1	5	4	4,5	97	5,85	Female	-0,494060876020788	T3	9,12047141796585	8,76210096510765	-0,893615441722346	juni	6	6	Weekend	Saturday	51	-21,3979213066073	0	PA_SNI	PA_SNI
34	primary	old	103	PA_SNI	348	0	11	0	5	2018-03-12	3	1	6686	61	imputed	10,3	2,6	1,8	1,79684451334136	4,72602248181474	0,390016471597537	NA	NA	NA	NA	NA	NA	NA	NA	NA	NA	NA	NA	Male	-0,494060876020788	T1	-1,87952858203415	-3,93789903489235	0,906384558277654	maart	3	1	Week	Monday	85	12,6020786933927	0	PA_SNI	PA_SNI
34	primary	old	103	PA_SNI	348	0	11	0	5	2018-03-10	1	1	3667	77	imputed	11,4	1,8	6,6	1,79684451334136	4,72602248181474	0,390016471597537	NA	NA	NA	NA	NA	NA	NA	NA	NA	NA	NA	NA	Male	-0,494060876020788	T1	-0,77952858203415	-4,73789903489235	5,70638455827765	maart	3	6	Weekend	Saturday	89	16,6020786933927	0	PA_SNI	PA_SNI
34	primary	old	103	PA_SNI	346	0	11	0	7	2018-06-30	2	1	9138	70	imputed	21,3	15,3	0	2,16942527895243	3,2	-1,1360060102172	NA	NA	NA	NA	NA	NA	NA	NA	NA	NA	NA	NA	Male	-0,494060876020788	T3	9,12047141796585	8,76210096510765	-0,893615441722346	juni	6	6	Weekend	Saturday	51	-21,3979213066073	0	PA_SNI	PA_SNI
34	primary	old	103	PA_SNI	337	0	12	1	6	2018-06-02	2	1	12129	60	imputed	17	0,1	1,2	-0,340455388827224	4,49285377955147	0,156847769334264	NA	NA	NA	NA	NA	NA	NA	NA	NA	NA	NA	NA	Male	0,505939123979212	T2	4,82047141796585	-6,43789903489235	0,306384558277654	juni	6	6	Weekend	Saturday	89	16,6020786933927	0	PA_SNI	PA_SNI
34	primary	old	103	PA_SNI	337	0	12	1	7	2018-07-01	3	1	16624	39	imputed	21,3	15,3	0	-0,340455388827224	4,49285377955147	0,156847769334264	NA	NA	NA	NA	NA	NA	NA	NA	NA	NA	NA	NA	Male	0,505939123979212	T3	9,12047141796585	8,76210096510765	-0,893615441722346	juli	7	0	Weekend	Sunday	36	-36,3979213066073	0	PA_SNI	PA_SNI
34	primary	old	103	PA_SNI	337	0	12	1	7	2018-06-30	2	1	7908	125	imputed	21,3	15,3	0	-0,340455388827224	4,49285377955147	0,156847769334264	NA	NA	NA	NA	NA	NA	NA	NA	NA	NA	NA	NA	Male	0,505939123979212	T3	9,12047141796585	8,76210096510765	-0,893615441722346	juni	6	6	Weekend	Saturday	51	-21,3979213066073	0	PA_SNI	PA_SNI
34	primary	old	103	PA_SNI	351	0	12	0	5	2018-03-12	3	1	10338	52	imputed	10,3	2,6	1,8	-0,742343378304728	4,26316248340505	-0,0728435268121572	NA	NA	NA	NA	NA	NA	NA	NA	NA	NA	100	6	Male	0,505939123979212	T1	-1,87952858203415	-3,93789903489235	0,906384558277654	maart	3	1	Week	Monday	85	12,6020786933927	0	PA_SNI	PA_SNI
34	primary	old	103	PA_SNI	351	0	12	0	5	2018-03-11	2	1	11927	100	imputed	10,2	2,5	1	-0,742343378304728	4,26316248340505	-0,0728435268121572	NA	NA	NA	NA	NA	NA	NA	NA	NA	NA	100	6	Male	0,505939123979212	T1	-1,97952858203415	-4,03789903489235	0,106384558277654	maart	3	0	Weekend	Sunday	91	18,6020786933927	0	PA_SNI	PA_SNI
34	primary	old	103	PA_SNI	348	0	11	0	7	2018-06-30	2	0	14351	0	imputed	21,3	15,3	0	1,79684451334136	4,72602248181474	0,390016471597537	NA	NA	NA	NA	NA	NA	NA	NA	NA	NA	NA	NA	Male	-0,494060876020788	T3	9,12047141796585	8,76210096510765	-0,893615441722346	juni	6	6	Weekend	Saturday	51	-21,3979213066073	0	PA_SNI	PA_SNI
34	primary	old	103	PA_SNI	350	0	11	0	5	2018-03-12	3	1	1400	0	observed	10,3	2,6	1,8	0,0870521786891658	4,1	-0,236006010217203	6	6	4	5	3,67	4,33	4	4	5	4,5	100	6	Male	-0,494060876020788	T1	-1,87952858203415	-3,93789903489235	0,906384558277654	maart	3	1	Week	Monday	85	12,6020786933927	0	PA_SNI	PA_SNI
34	primary	old	103	PA_SNI	350	0	11	0	5	2018-03-11	2	1	14873	0	imputed	10,2	2,5	1	0,0870521786891658	4,1	-0,236006010217203	6	6	4	5	3,67	4,33	4	4	5	4,5	100	6	Male	-0,494060876020788	T1	-1,97952858203415	-4,03789903489235	0,106384558277654	maart	3	0	Weekend	Sunday	91	18,6020786933927	0	PA_SNI	PA_SNI
34	primary	old	103	PA_SNI	350	0	11	0	5	2018-03-10	1	1	12094	91	observed	11,4	1,8	6,6	0,0870521786891658	4,1	-0,236006010217203	6	6	4	5	3,67	4,33	4	4	5	4,5	100	6	Male	-0,494060876020788	T1	-0,77952858203415	-4,73789903489235	5,70638455827765	maart	3	6	Weekend	Saturday	89	16,6020786933927	0	PA_SNI	PA_SNI
34	primary	old	103	PA_SNI	350	0	11	0	6	2018-06-01	1	1	16831	45	observed	17,6	1,2	1,5	0,0870521786891658	4,1	-0,236006010217203	NA	NA	NA	NA	NA	NA	NA	NA	NA	NA	NA	NA	Male	-0,494060876020788	T2	5,42047141796585	-5,33789903489235	0,606384558277654	juni	6	5	Week	Friday	90	17,6020786933927	0	PA_SNI	PA_SNI
34	primary	old	103	PA_SNI	350	0	11	0	6	2018-06-02	2	1	2917	24	observed	17	0,1	1,2	0,0870521786891658	4,1	-0,236006010217203	NA	NA	NA	NA	NA	NA	NA	NA	NA	NA	NA	NA	Male	-0,494060876020788	T2	4,82047141796585	-6,43789903489235	0,306384558277654	juni	6	6	Weekend	Saturday	89	16,6020786933927	0	PA_SNI	PA_SNI
34	primary	old	103	PA_SNI	350	0	11	0	6	2018-06-03	3	1	19107	63	imputed	19,3	4,6	0	0,0870521786891658	4,1	-0,236006010217203	NA	NA	NA	NA	NA	NA	NA	NA	NA	NA	NA	NA	Male	-0,494060876020788	T2	7,12047141796585	-1,93789903489235	-0,893615441722346	juni	6	0	Weekend	Sunday	79	6,60207869339273	0	PA_SNI	PA_SNI
34	primary	old	103	PA_SNI	351	0	13	0	7	2018-06-29	1	1	5015	11	observed	19,5	15,3	0	-0,742343378304728	4,26316248340505	-0,0728435268121572	NA	NA	NA	NA	NA	NA	NA	NA	NA	NA	NA	NA	Male	1,50593912397921	T3	7,32047141796585	8,76210096510765	-0,893615441722346	juni	6	5	Week	Friday	66	-6,39792130660727	0	PA_SNI	PA_SNI
34	primary	old	103	PA_SNI	339	0	12	0	5	2018-03-11	2	1	6113	35	imputed	10,2	2,5	1	0,469036834449826	4,78512862276547	0,449122612548267	4	4	4	4	4	4	4	5	5	5	58	3,9	Male	0,505939123979212	T1	-1,97952858203415	-4,03789903489235	0,106384558277654	maart	3	0	Weekend	Sunday	91	18,6020786933927	0	PA_SNI	PA_SNI
34	primary	old	103	PA_SNI	351	0	12	0	5	2018-03-10	1	1	14360	101	observed	11,4	1,8	6,6	-0,742343378304728	4,26316248340505	-0,0728435268121572	NA	NA	NA	NA	NA	NA	NA	NA	NA	NA	100	6	Male	0,505939123979212	T1	-0,77952858203415	-4,73789903489235	5,70638455827765	maart	3	6	Weekend	Saturday	89	16,6020786933927	0	PA_SNI	PA_SNI
34	primary	old	103	PA_SNI	346	0	11	0	5	2018-03-13	4	1	7874	28	observed	5,6	0	7,6	2,16942527895243	3,2	-1,1360060102172	3	4	3	4,5	5	2	1	5	5	5	69	4,45	Male	-0,494060876020788	T1	-6,57952858203415	-6,53789903489235	6,70638455827765	maart	3	2	Week	Tuesday	92	19,6020786933927	0	PA_SNI	PA_SNI
34	primary	old	103	PA_SNI	339	0	12	0	5	2018-03-12	3	1	12343	73	imputed	10,3	2,6	1,8	0,469036834449826	4,78512862276547	0,449122612548267	4	4	4	4	4	4	4	5	5	5	58	3,9	Male	0,505939123979212	T1	-1,87952858203415	-3,93789903489235	0,906384558277654	maart	3	1	Week	Monday	85	12,6020786933927	0	PA_SNI	PA_SNI
34	primary	old	103	PA_SNI	338	0	12	0	6	2018-06-02	2	0	18437	16	imputed	17	0,1	1,2	1,00730731709621	4,1215620712453	-0,214443938971904	NA	NA	NA	NA	NA	NA	NA	NA	NA	NA	NA	NA	Male	0,505939123979212	T2	4,82047141796585	-6,43789903489235	0,306384558277654	juni	6	6	Weekend	Saturday	89	16,6020786933927	0	PA_SNI	PA_SNI
34	primary	old	103	PA_SNI	338	0	12	0	6	2018-06-03	3	0	8118	24	imputed	19,3	4,6	0	1,00730731709621	4,1215620712453	-0,214443938971904	NA	NA	NA	NA	NA	NA	NA	NA	NA	NA	NA	NA	Male	0,505939123979212	T2	7,12047141796585	-1,93789903489235	-0,893615441722346	juni	6	0	Weekend	Sunday	79	6,60207869339273	0	PA_SNI	PA_SNI
34	primary	old	103	PA_SNI	338	0	12	0	7	2018-06-29	1	0	9103	64	imputed	19,5	15,3	0	1,00730731709621	4,1215620712453	-0,214443938971904	NA	NA	NA	NA	NA	NA	NA	NA	NA	NA	NA	NA	Male	0,505939123979212	T3	7,32047141796585	8,76210096510765	-0,893615441722346	juni	6	5	Week	Friday	66	-6,39792130660727	0	PA_SNI	PA_SNI
34	primary	old	103	PA_SNI	346	0	11	0	5	2018-03-12	3	1	9957	32	observed	10,3	2,6	1,8	2,16942527895243	3,2	-1,1360060102172	3	4	3	4,5	5	2	1	5	5	5	69	4,45	Male	-0,494060876020788	T1	-1,87952858203415	-3,93789903489235	0,906384558277654	maart	3	1	Week	Monday	85	12,6020786933927	0	PA_SNI	PA_SNI
34	primary	old	103	PA_SNI	350	0	11	0	7	2018-06-30	2	1	7634	0	imputed	21,3	15,3	0	0,0870521786891658	4,1	-0,236006010217203	NA	NA	NA	NA	NA	NA	NA	NA	NA	NA	NA	NA	Male	-0,494060876020788	T3	9,12047141796585	8,76210096510765	-0,893615441722346	juni	6	6	Weekend	Saturday	51	-21,3979213066073	0	PA_SNI	PA_SNI
34	primary	old	103	PA_SNI	351	0	13	0	6	2018-06-02	2	1	6258	48	imputed	17	0,1	1,2	-0,742343378304728	4,26316248340505	-0,0728435268121572	NA	NA	NA	NA	NA	NA	NA	NA	NA	NA	NA	NA	Male	1,50593912397921	T2	4,82047141796585	-6,43789903489235	0,306384558277654	juni	6	6	Weekend	Saturday	89	16,6020786933927	0	PA_SNI	PA_SNI
34	primary	old	103	PA_SNI	347	0	12	0	6	2018-06-03	3	1	15732	61	imputed	19,3	4,6	0	-0,484796390011347	3,6	-0,736006010217202	NA	NA	NA	NA	NA	NA	NA	NA	NA	NA	80	5	Male	0,505939123979212	T2	7,12047141796585	-1,93789903489235	-0,893615441722346	juni	6	0	Weekend	Sunday	79	6,60207869339273	0	PA_SNI	PA_SNI
34	primary	old	103	PA_SNI	346	0	11	0	6	2018-06-03	3	1	10325	44	imputed	19,3	4,6	0	2,16942527895243	3,2	-1,1360060102172	NA	NA	NA	NA	NA	NA	NA	6	5	5,5	49	3,45	Male	-0,494060876020788	T2	7,12047141796585	-1,93789903489235	-0,893615441722346	juni	6	0	Weekend	Sunday	79	6,60207869339273	0	PA_SNI	PA_SNI
34	primary	old	103	PA_SNI	351	0	13	0	6	2018-06-03	3	1	5093	63	imputed	19,3	4,6	0	-0,742343378304728	4,26316248340505	-0,0728435268121572	NA	NA	NA	NA	NA	NA	NA	NA	NA	NA	NA	NA	Male	1,50593912397921	T2	7,12047141796585	-1,93789903489235	-0,893615441722346	juni	6	0	Weekend	Sunday	79	6,60207869339273	0	PA_SNI	PA_SNI
34	primary	old	103	PA_SNI	351	0	13	0	7	2018-06-30	2	1	1657	0	observed	21,3	15,3	0	-0,742343378304728	4,26316248340505	-0,0728435268121572	NA	NA	NA	NA	NA	NA	NA	NA	NA	NA	NA	NA	Male	1,50593912397921	T3	9,12047141796585	8,76210096510765	-0,893615441722346	juni	6	6	Weekend	Saturday	51	-21,3979213066073	0	PA_SNI	PA_SNI
34	primary	old	103	PA_SNI	346	0	11	0	5	2018-03-10	1	1	10504	38	observed	11,4	1,8	6,6	2,16942527895243	3,2	-1,1360060102172	3	4	3	4,5	5	2	1	5	5	5	69	4,45	Male	-0,494060876020788	T1	-0,77952858203415	-4,73789903489235	5,70638455827765	maart	3	6	Weekend	Saturday	89	16,6020786933927	0	PA_SNI	PA_SNI
34	primary	old	103	PA_SNI	2875	1	11	0	6	2018-06-02	2	1	9586	65	observed	17	0,1	1,2	0,376521120528399	4,45	0,113993989782798	7	7	7	6	6	1	1	2	1	1,5	100	6	Female	-0,494060876020788	T2	4,82047141796585	-6,43789903489235	0,306384558277654	juni	6	6	Weekend	Saturday	89	16,6020786933927	0	PA_SNI	PA_SNI
34	primary	old	103	PA_SNI	346	0	11	0	6	2018-06-01	1	1	7739	8	observed	17,6	1,2	1,5	2,16942527895243	3,2	-1,1360060102172	NA	NA	NA	NA	NA	NA	NA	6	5	5,5	49	3,45	Male	-0,494060876020788	T2	5,42047141796585	-5,33789903489235	0,606384558277654	juni	6	5	Week	Friday	90	17,6020786933927	0	PA_SNI	PA_SNI
34	primary	old	103	PA_SNI	346	0	11	0	6	2018-06-02	2	1	2965	0	observed	17	0,1	1,2	2,16942527895243	3,2	-1,1360060102172	NA	NA	NA	NA	NA	NA	NA	6	5	5,5	49	3,45	Male	-0,494060876020788	T2	4,82047141796585	-6,43789903489235	0,306384558277654	juni	6	6	Weekend	Saturday	89	16,6020786933927	0	PA_SNI	PA_SNI
34	primary	old	103	PA_SNI	351	0	13	0	6	2018-06-01	1	1	10296	108	imputed	17,6	1,2	1,5	-0,742343378304728	4,26316248340505	-0,0728435268121572	NA	NA	NA	NA	NA	NA	NA	NA	NA	NA	NA	NA	Male	1,50593912397921	T2	5,42047141796585	-5,33789903489235	0,606384558277654	juni	6	5	Week	Friday	90	17,6020786933927	0	PA_SNI	PA_SNI
34	primary	old	103	PA_SNI	2875	1	11	0	5	2018-03-10	1	1	2992	8	imputed	11,4	1,8	6,6	0,376521120528399	4,45	0,113993989782798	7	7	0	5,5	6	1	1	6	4	5	86	5,3	Female	-0,494060876020788	T1	-0,77952858203415	-4,73789903489235	5,70638455827765	maart	3	6	Weekend	Saturday	89	16,6020786933927	0	PA_SNI	PA_SNI
34	primary	new	250	PA_SNI	2907	0	10	0	6	2018-06-01	1	1	13063	66	observed	17,6	1,2	1,5	2,0095715524814	3	-1,3360060102172	3	2	3	3	3,33	2,33	1	4	4	4	61	4,05	Male	-1,49406087602079	T2	5,42047141796585	-5,33789903489235	0,606384558277654	juni	6	5	Week	Friday	90	17,6020786933927	0	PA_SNI	PA_SNI
34	primary	new	250	PA_SNI	2908	1	10	0	7	2018-07-02	4	1	3428	0	observed	20,6	15,3	0	1,75577518686517	3,85	-0,486006010217202	2	2	2	5,5	5,33	2	1	6	6	6	91	5,55	Female	-1,49406087602079	T3	8,42047141796585	8,76210096510765	-0,893615441722346	juli	7	1	Week	Monday	40	-32,3979213066073	0	PA_SNI	PA_SNI
34	primary	new	250	PA_SNI	2908	1	10	0	7	2018-07-03	5	1	10869	31	observed	19,6	15,3	0	1,75577518686517	3,85	-0,486006010217202	2	2	2	5,5	5,33	2	1	6	6	6	91	5,55	Female	-1,49406087602079	T3	7,42047141796585	8,76210096510765	-0,893615441722346	juli	7	2	Week	Tuesday	60	-12,3979213066073	0	PA_SNI	PA_SNI
34	primary	new	250	PA_SNI	2908	1	10	0	5	2018-03-14	5	1	9732	47	observed	5,8	9,4	0	1,75577518686517	3,85	-0,486006010217202	1	1	1	5,5	5,67	2,33	1	6	6	6	85	5,25	Female	-1,49406087602079	T1	-6,37952858203415	2,86210096510765	-0,893615441722346	maart	3	3	Week	Wednesday	80	7,60207869339273	0	PA_SNI	PA_SNI
34	primary	new	250	PA_SNI	2908	1	10	0	5	2018-03-12	3	1	5459	11	observed	10,3	2,6	1,8	1,75577518686517	3,85	-0,486006010217202	1	1	1	5,5	5,67	2,33	1	6	6	6	85	5,25	Female	-1,49406087602079	T1	-1,87952858203415	-3,93789903489235	0,906384558277654	maart	3	1	Week	Monday	85	12,6020786933927	0	PA_SNI	PA_SNI
34	primary	new	250	PA_SNI	2908	1	10	0	6	2018-06-02	2	1	8200	33	observed	17	0,1	1,2	1,75577518686517	3,85	-0,486006010217202	1	1	1	5,5	5,67	1,33	1	6	6	6	80	5	Female	-1,49406087602079	T2	4,82047141796585	-6,43789903489235	0,306384558277654	juni	6	6	Weekend	Saturday	89	16,6020786933927	0	PA_SNI	PA_SNI
34	primary	new	250	PA_SNI	2908	1	10	0	6	2018-06-03	3	1	6081	0	observed	19,3	4,6	0	1,75577518686517	3,85	-0,486006010217202	1	1	1	5,5	5,67	1,33	1	6	6	6	80	5	Female	-1,49406087602079	T2	7,12047141796585	-1,93789903489235	-0,893615441722346	juni	6	0	Weekend	Sunday	79	6,60207869339273	0	PA_SNI	PA_SNI
34	primary	new	250	PA_SNI	2905	0	10	1	6	2018-06-04	4	1	20937	140	observed	18,2	4,9	0	-0,0289469378503758	4,65	0,313993989782798	7	3	7	4,5	5,33	1,67	1	6	6	6	100	6	Male	-1,49406087602079	T2	6,02047141796585	-1,63789903489235	-0,893615441722346	juni	6	1	Week	Monday	82	9,60207869339273	0	PA_SNI	PA_SNI
34	primary	new	250	PA_SNI	2905	0	10	1	6	2018-06-03	3	1	16466	90	observed	19,3	4,6	0	-0,0289469378503758	4,65	0,313993989782798	7	3	7	4,5	5,33	1,67	1	6	6	6	100	6	Male	-1,49406087602079	T2	7,12047141796585	-1,93789903489235	-0,893615441722346	juni	6	0	Weekend	Sunday	79	6,60207869339273	0	PA_SNI	PA_SNI
34	primary	new	250	PA_SNI	2908	1	10	0	6	2018-06-04	4	1	22837	138	observed	18,2	4,9	0	1,75577518686517	3,85	-0,486006010217202	1	1	1	5,5	5,67	1,33	1	6	6	6	80	5	Female	-1,49406087602079	T2	6,02047141796585	-1,63789903489235	-0,893615441722346	juni	6	1	Week	Monday	82	9,60207869339273	0	PA_SNI	PA_SNI
34	primary	new	250	PA_SNI	2907	0	10	0	6	2018-06-02	2	1	17344	103	observed	17	0,1	1,2	2,0095715524814	3	-1,3360060102172	3	2	3	3	3,33	2,33	1	4	4	4	61	4,05	Male	-1,49406087602079	T2	4,82047141796585	-6,43789903489235	0,306384558277654	juni	6	6	Weekend	Saturday	89	16,6020786933927	0	PA_SNI	PA_SNI
34	primary	new	250	PA_SNI	2905	0	10	1	6	2018-06-05	5	1	18967	120	observed	16,7	7,9	0	-0,0289469378503758	4,65	0,313993989782798	7	3	7	4,5	5,33	1,67	1	6	6	6	100	6	Male	-1,49406087602079	T2	4,52047141796585	1,36210096510765	-0,893615441722346	juni	6	2	Week	Tuesday	76	3,60207869339273	0	PA_SNI	PA_SNI
34	primary	new	250	PA_SNI	2905	0	10	1	6	2018-06-02	2	1	18678	161	observed	17	0,1	1,2	-0,0289469378503758	4,65	0,313993989782798	7	3	7	4,5	5,33	1,67	1	6	6	6	100	6	Male	-1,49406087602079	T2	4,82047141796585	-6,43789903489235	0,306384558277654	juni	6	6	Weekend	Saturday	89	16,6020786933927	0	PA_SNI	PA_SNI
34	primary	new	250	PA_SNI	2907	0	10	0	7	2018-06-30	2	1	13381	75	imputed	21,3	15,3	0	2,0095715524814	3	-1,3360060102172	NA	NA	NA	NA	NA	NA	NA	NA	NA	NA	NA	NA	Male	-1,49406087602079	T3	9,12047141796585	8,76210096510765	-0,893615441722346	juni	6	6	Weekend	Saturday	51	-21,3979213066073	0	PA_SNI	PA_SNI
34	primary	new	250	PA_SNI	2908	1	10	0	6	2018-06-05	5	1	23976	160	observed	16,7	7,9	0	1,75577518686517	3,85	-0,486006010217202	1	1	1	5,5	5,67	1,33	1	6	6	6	80	5	Female	-1,49406087602079	T2	4,52047141796585	1,36210096510765	-0,893615441722346	juni	6	2	Week	Tuesday	76	3,60207869339273	0	PA_SNI	PA_SNI
34	primary	new	250	PA_SNI	2905	0	10	1	5	2018-03-11	2	1	8928	36	observed	10,2	2,5	1	-0,0289469378503758	4,65	0,313993989782798	7	3	0	2	3	3,67	1	1	2	1,5	90	5,5	Male	-1,49406087602079	T1	-1,97952858203415	-4,03789903489235	0,106384558277654	maart	3	0	Weekend	Sunday	91	18,6020786933927	0	PA_SNI	PA_SNI
34	primary	new	250	PA_SNI	2905	0	10	1	5	2018-03-14	5	1	16026	77	observed	5,8	9,4	0	-0,0289469378503758	4,65	0,313993989782798	7	3	0	2	3	3,67	1	1	2	1,5	90	5,5	Male	-1,49406087602079	T1	-6,37952858203415	2,86210096510765	-0,893615441722346	maart	3	3	Week	Wednesday	80	7,60207869339273	0	PA_SNI	PA_SNI
34	primary	new	250	PA_SNI	2905	0	10	1	5	2018-03-10	1	1	14895	96	observed	11,4	1,8	6,6	-0,0289469378503758	4,65	0,313993989782798	7	3	0	2	3	3,67	1	1	2	1,5	90	5,5	Male	-1,49406087602079	T1	-0,77952858203415	-4,73789903489235	5,70638455827765	maart	3	6	Weekend	Saturday	89	16,6020786933927	0	PA_SNI	PA_SNI
34	primary	new	250	PA_SNI	2905	0	10	1	5	2018-03-13	4	1	7938	50	observed	5,6	0	7,6	-0,0289469378503758	4,65	0,313993989782798	7	3	0	2	3	3,67	1	1	2	1,5	90	5,5	Male	-1,49406087602079	T1	-6,57952858203415	-6,53789903489235	6,70638455827765	maart	3	2	Week	Tuesday	92	19,6020786933927	0	PA_SNI	PA_SNI
34	primary	new	250	PA_SNI	2908	1	10	0	6	2018-06-01	1	1	6476	0	observed	17,6	1,2	1,5	1,75577518686517	3,85	-0,486006010217202	1	1	1	5,5	5,67	1,33	1	6	6	6	80	5	Female	-1,49406087602079	T2	5,42047141796585	-5,33789903489235	0,606384558277654	juni	6	5	Week	Friday	90	17,6020786933927	0	PA_SNI	PA_SNI
34	primary	new	250	PA_SNI	2911	1	9	0	5	2018-03-13	4	1	11990	23	observed	5,6	0	7,6	-1,06900570816536	4,1	-0,236006010217203	5	4	5	6	6	1	1	6	6	6	97	5,85	Female	-2,49406087602079	T1	-6,57952858203415	-6,53789903489235	6,70638455827765	maart	3	2	Week	Tuesday	92	19,6020786933927	0	PA_SNI	PA_SNI
34	primary	new	250	PA_SNI	2911	1	9	0	6	2018-06-02	2	1	16011	109	observed	17	0,1	1,2	-1,06900570816536	4,1	-0,236006010217203	1	1	0	5,5	4,33	4,33	5,33	6	6	6	99	5,95	Female	-2,49406087602079	T2	4,82047141796585	-6,43789903489235	0,306384558277654	juni	6	6	Weekend	Saturday	89	16,6020786933927	0	PA_SNI	PA_SNI
34	primary	new	250	PA_SNI	2911	1	9	0	6	2018-06-01	1	1	1911	0	observed	17,6	1,2	1,5	-1,06900570816536	4,1	-0,236006010217203	1	1	0	5,5	4,33	4,33	5,33	6	6	6	99	5,95	Female	-2,49406087602079	T2	5,42047141796585	-5,33789903489235	0,606384558277654	juni	6	5	Week	Friday	90	17,6020786933927	0	PA_SNI	PA_SNI
34	primary	new	250	PA_SNI	2911	1	9	0	6	2018-06-03	3	1	15333	123	imputed	19,3	4,6	0	-1,06900570816536	4,1	-0,236006010217203	1	1	0	5,5	4,33	4,33	5,33	6	6	6	99	5,95	Female	-2,49406087602079	T2	7,12047141796585	-1,93789903489235	-0,893615441722346	juni	6	0	Weekend	Sunday	79	6,60207869339273	0	PA_SNI	PA_SNI
34	primary	new	250	PA_SNI	2907	0	10	0	6	2018-06-04	4	1	16327	80	observed	18,2	4,9	0	2,0095715524814	3	-1,3360060102172	3	2	3	3	3,33	2,33	1	4	4	4	61	4,05	Male	-1,49406087602079	T2	6,02047141796585	-1,63789903489235	-0,893615441722346	juni	6	1	Week	Monday	82	9,60207869339273	0	PA_SNI	PA_SNI
34	primary	new	250	PA_SNI	2910	1	10	0	6	2018-06-03	3	1	1509	0	observed	19,3	4,6	0	0,182041091357701	3,07711757945695	-1,25888843076025	1	4	4	6	6	6	6	6	6	6	49	3,45	Female	-1,49406087602079	T2	7,12047141796585	-1,93789903489235	-0,893615441722346	juni	6	0	Weekend	Sunday	79	6,60207869339273	0	PA_SNI	PA_SNI
34	primary	new	250	PA_SNI	2905	0	10	1	6	2018-06-01	1	1	15067	84	observed	17,6	1,2	1,5	-0,0289469378503758	4,65	0,313993989782798	7	3	7	4,5	5,33	1,67	1	6	6	6	100	6	Male	-1,49406087602079	T2	5,42047141796585	-5,33789903489235	0,606384558277654	juni	6	5	Week	Friday	90	17,6020786933927	0	PA_SNI	PA_SNI
34	primary	new	250	PA_SNI	2907	0	10	0	7	2018-07-01	3	1	14182	61	imputed	21,3	15,3	0	2,0095715524814	3	-1,3360060102172	NA	NA	NA	NA	NA	NA	NA	NA	NA	NA	NA	NA	Male	-1,49406087602079	T3	9,12047141796585	8,76210096510765	-0,893615441722346	juli	7	0	Weekend	Sunday	36	-36,3979213066073	0	PA_SNI	PA_SNI
34	primary	new	250	PA_SNI	2907	0	10	0	7	2018-06-29	1	1	13437	37	imputed	19,5	15,3	0	2,0095715524814	3	-1,3360060102172	NA	NA	NA	NA	NA	NA	NA	NA	NA	NA	NA	NA	Male	-1,49406087602079	T3	7,32047141796585	8,76210096510765	-0,893615441722346	juni	6	5	Week	Friday	66	-6,39792130660727	0	PA_SNI	PA_SNI
34	primary	new	250	PA_SNI	2908	1	10	0	5	2018-03-13	4	1	6931	9	observed	5,6	0	7,6	1,75577518686517	3,85	-0,486006010217202	1	1	1	5,5	5,67	2,33	1	6	6	6	85	5,25	Female	-1,49406087602079	T1	-6,57952858203415	-6,53789903489235	6,70638455827765	maart	3	2	Week	Tuesday	92	19,6020786933927	0	PA_SNI	PA_SNI
34	primary	new	250	PA_SNI	2908	1	10	0	5	2018-03-11	2	1	4782	10	observed	10,2	2,5	1	1,75577518686517	3,85	-0,486006010217202	1	1	1	5,5	5,67	2,33	1	6	6	6	85	5,25	Female	-1,49406087602079	T1	-1,97952858203415	-4,03789903489235	0,106384558277654	maart	3	0	Weekend	Sunday	91	18,6020786933927	0	PA_SNI	PA_SNI
34	primary	new	250	PA_SNI	2908	1	10	0	5	2018-03-10	1	1	6346	10	observed	11,4	1,8	6,6	1,75577518686517	3,85	-0,486006010217202	1	1	1	5,5	5,67	2,33	1	6	6	6	85	5,25	Female	-1,49406087602079	T1	-0,77952858203415	-4,73789903489235	5,70638455827765	maart	3	6	Weekend	Saturday	89	16,6020786933927	0	PA_SNI	PA_SNI
34	primary	new	250	PA_SNI	2905	0	10	1	5	2018-03-12	3	1	13356	89	observed	10,3	2,6	1,8	-0,0289469378503758	4,65	0,313993989782798	7	3	0	2	3	3,67	1	1	2	1,5	90	5,5	Male	-1,49406087602079	T1	-1,87952858203415	-3,93789903489235	0,906384558277654	maart	3	1	Week	Monday	85	12,6020786933927	0	PA_SNI	PA_SNI
34	primary	new	250	PA_SNI	2907	0	9	0	5	2018-03-11	2	1	10495	72	observed	10,2	2,5	1	2,0095715524814	3	-1,3360060102172	3	3	5	4	3,67	3	2,33	5	3	4	58	3,9	Male	-2,49406087602079	T1	-1,97952858203415	-4,03789903489235	0,106384558277654	maart	3	0	Weekend	Sunday	91	18,6020786933927	0	PA_SNI	PA_SNI
34	primary	new	250	PA_SNI	2907	0	9	0	5	2018-03-13	4	1	13244	53	observed	5,6	0	7,6	2,0095715524814	3	-1,3360060102172	3	3	5	4	3,67	3	2,33	5	3	4	58	3,9	Male	-2,49406087602079	T1	-6,57952858203415	-6,53789903489235	6,70638455827765	maart	3	2	Week	Tuesday	92	19,6020786933927	0	PA_SNI	PA_SNI
34	primary	new	250	PA_SNI	2907	0	9	0	5	2018-03-10	1	1	23204	169	observed	11,4	1,8	6,6	2,0095715524814	3	-1,3360060102172	3	3	5	4	3,67	3	2,33	5	3	4	58	3,9	Male	-2,49406087602079	T1	-0,77952858203415	-4,73789903489235	5,70638455827765	maart	3	6	Weekend	Saturday	89	16,6020786933927	0	PA_SNI	PA_SNI
34	primary	new	250	PA_SNI	2907	0	10	0	6	2018-06-03	3	1	17911	101	observed	19,3	4,6	0	2,0095715524814	3	-1,3360060102172	3	2	3	3	3,33	2,33	1	4	4	4	61	4,05	Male	-1,49406087602079	T2	7,12047141796585	-1,93789903489235	-0,893615441722346	juni	6	0	Weekend	Sunday	79	6,60207869339273	0	PA_SNI	PA_SNI
34	primary	new	250	PA_SNI	2907	0	10	0	6	2018-06-05	5	1	15654	85	observed	16,7	7,9	0	2,0095715524814	3	-1,3360060102172	3	2	3	3	3,33	2,33	1	4	4	4	61	4,05	Male	-1,49406087602079	T2	4,52047141796585	1,36210096510765	-0,893615441722346	juni	6	2	Week	Tuesday	76	3,60207869339273	0	PA_SNI	PA_SNI
34	primary	new	250	PA_SNI	2911	1	9	0	7	2018-07-01	3	1	4964	237	imputed	21,3	15,3	0	-1,06900570816536	4,1	-0,236006010217203	3	5	1	5	5	5	5	5	5	5	82	5,1	Female	-2,49406087602079	T3	9,12047141796585	8,76210096510765	-0,893615441722346	juli	7	0	Weekend	Sunday	36	-36,3979213066073	0	PA_SNI	PA_SNI
34	primary	new	250	PA_SNI	2910	1	10	0	6	2018-06-01	1	1	4144	0	observed	17,6	1,2	1,5	0,182041091357701	3,07711757945695	-1,25888843076025	1	4	4	6	6	6	6	6	6	6	49	3,45	Female	-1,49406087602079	T2	5,42047141796585	-5,33789903489235	0,606384558277654	juni	6	5	Week	Friday	90	17,6020786933927	0	PA_SNI	PA_SNI
34	primary	new	250	PA_SNI	2910	1	10	0	7	2018-06-29	1	1	3548	18	observed	19,5	15,3	0	0,182041091357701	3,07711757945695	-1,25888843076025	NA	NA	NA	NA	NA	NA	NA	NA	NA	NA	96	5,8	Female	-1,49406087602079	T3	7,32047141796585	8,76210096510765	-0,893615441722346	juni	6	5	Week	Friday	66	-6,39792130660727	0	PA_SNI	PA_SNI
34	primary	new	250	PA_SNI	2910	1	10	0	7	2018-07-01	3	1	1000	88	imputed	21,3	15,3	0	0,182041091357701	3,07711757945695	-1,25888843076025	NA	NA	NA	NA	NA	NA	NA	NA	NA	NA	96	5,8	Female	-1,49406087602079	T3	9,12047141796585	8,76210096510765	-0,893615441722346	juli	7	0	Weekend	Sunday	36	-36,3979213066073	0	PA_SNI	PA_SNI
34	primary	new	250	PA_SNI	2910	1	10	0	7	2018-06-30	2	1	1000	43	imputed	21,3	15,3	0	0,182041091357701	3,07711757945695	-1,25888843076025	NA	NA	NA	NA	NA	NA	NA	NA	NA	NA	96	5,8	Female	-1,49406087602079	T3	9,12047141796585	8,76210096510765	-0,893615441722346	juni	6	6	Weekend	Saturday	51	-21,3979213066073	0	PA_SNI	PA_SNI
34	primary	new	250	PA_SNI	2911	1	9	0	5	2018-03-12	3	1	6452	13	observed	10,3	2,6	1,8	-1,06900570816536	4,1	-0,236006010217203	5	4	5	6	6	1	1	6	6	6	97	5,85	Female	-2,49406087602079	T1	-1,87952858203415	-3,93789903489235	0,906384558277654	maart	3	1	Week	Monday	85	12,6020786933927	0	PA_SNI	PA_SNI
34	primary	new	250	PA_SNI	2911	1	9	0	5	2018-03-10	1	1	23695	214	observed	11,4	1,8	6,6	-1,06900570816536	4,1	-0,236006010217203	5	4	5	6	6	1	1	6	6	6	97	5,85	Female	-2,49406087602079	T1	-0,77952858203415	-4,73789903489235	5,70638455827765	maart	3	6	Weekend	Saturday	89	16,6020786933927	0	PA_SNI	PA_SNI
34	primary	new	250	PA_SNI	2911	1	9	0	5	2018-03-11	2	1	15940	128	observed	10,2	2,5	1	-1,06900570816536	4,1	-0,236006010217203	5	4	5	6	6	1	1	6	6	6	97	5,85	Female	-2,49406087602079	T1	-1,97952858203415	-4,03789903489235	0,106384558277654	maart	3	0	Weekend	Sunday	91	18,6020786933927	0	PA_SNI	PA_SNI
34	primary	new	250	PA_SNI	2913	1	10	0	6	2018-06-04	4	1	5713	21	observed	18,2	4,9	0	-1,35080896029337	4,2	-0,136006010217202	NA	NA	NA	NA	NA	NA	NA	NA	NA	NA	74	4,7	Female	-1,49406087602079	T2	6,02047141796585	-1,63789903489235	-0,893615441722346	juni	6	1	Week	Monday	82	9,60207869339273	0	PA_SNI	PA_SNI
34	primary	new	250	PA_SNI	2909	0	9	0	5	2018-03-13	4	1	11658	70	observed	5,6	0	7,6	1,10922091580064	4,2	-0,136006010217202	1	7	7	3	2,67	2,67	1	6	6	6	0	1	Male	-2,49406087602079	T1	-6,57952858203415	-6,53789903489235	6,70638455827765	maart	3	2	Week	Tuesday	92	19,6020786933927	0	PA_SNI	PA_SNI
34	primary	new	250	PA_SNI	2909	0	9	0	5	2018-03-14	5	1	9600	43	observed	5,8	9,4	0	1,10922091580064	4,2	-0,136006010217202	1	7	7	3	2,67	2,67	1	6	6	6	0	1	Male	-2,49406087602079	T1	-6,37952858203415	2,86210096510765	-0,893615441722346	maart	3	3	Week	Wednesday	80	7,60207869339273	0	PA_SNI	PA_SNI
34	primary	new	250	PA_SNI	2909	0	9	0	5	2018-03-10	1	1	22108	207	observed	11,4	1,8	6,6	1,10922091580064	4,2	-0,136006010217202	1	7	7	3	2,67	2,67	1	6	6	6	0	1	Male	-2,49406087602079	T1	-0,77952858203415	-4,73789903489235	5,70638455827765	maart	3	6	Weekend	Saturday	89	16,6020786933927	0	PA_SNI	PA_SNI
34	primary	new	250	PA_SNI	2909	0	9	0	5	2018-03-11	2	1	5106	10	observed	10,2	2,5	1	1,10922091580064	4,2	-0,136006010217202	1	7	7	3	2,67	2,67	1	6	6	6	0	1	Male	-2,49406087602079	T1	-1,97952858203415	-4,03789903489235	0,106384558277654	maart	3	0	Weekend	Sunday	91	18,6020786933927	0	PA_SNI	PA_SNI
34	primary	new	250	PA_SNI	2910	1	10	0	6	2018-06-02	2	1	8413	25	observed	17	0,1	1,2	0,182041091357701	3,07711757945695	-1,25888843076025	1	4	4	6	6	6	6	6	6	6	49	3,45	Female	-1,49406087602079	T2	4,82047141796585	-6,43789903489235	0,306384558277654	juni	6	6	Weekend	Saturday	89	16,6020786933927	0	PA_SNI	PA_SNI
34	primary	new	250	PA_SNI	2911	1	9	0	7	2018-06-30	2	1	1000	109	imputed	21,3	15,3	0	-1,06900570816536	4,1	-0,236006010217203	3	5	1	5	5	5	5	5	5	5	82	5,1	Female	-2,49406087602079	T3	9,12047141796585	8,76210096510765	-0,893615441722346	juni	6	6	Weekend	Saturday	51	-21,3979213066073	0	PA_SNI	PA_SNI
34	primary	new	250	PA_SNI	2911	1	9	0	7	2018-06-29	1	1	11532	259	imputed	19,5	15,3	0	-1,06900570816536	4,1	-0,236006010217203	3	5	1	5	5	5	5	5	5	5	82	5,1	Female	-2,49406087602079	T3	7,32047141796585	8,76210096510765	-0,893615441722346	juni	6	5	Week	Friday	66	-6,39792130660727	0	PA_SNI	PA_SNI
34	primary	new	250	PA_SNI	2913	1	9	0	5	2018-03-12	3	1	6273	25	imputed	10,3	2,6	1,8	-1,35080896029337	4,2	-0,136006010217202	6	6	6	2,5	2	1	1	1	1	1	52	3,6	Female	-2,49406087602079	T1	-1,87952858203415	-3,93789903489235	0,906384558277654	maart	3	1	Week	Monday	85	12,6020786933927	0	PA_SNI	PA_SNI
34	primary	new	250	PA_SNI	2908	1	10	0	7	2018-06-30	2	1	8516	0	observed	21,3	15,3	0	1,75577518686517	3,85	-0,486006010217202	2	2	2	5,5	5,33	2	1	6	6	6	91	5,55	Female	-1,49406087602079	T3	9,12047141796585	8,76210096510765	-0,893615441722346	juni	6	6	Weekend	Saturday	51	-21,3979213066073	0	PA_SNI	PA_SNI
34	primary	new	250	PA_SNI	2908	1	10	0	7	2018-06-29	1	1	17612	60	observed	19,5	15,3	0	1,75577518686517	3,85	-0,486006010217202	2	2	2	5,5	5,33	2	1	6	6	6	91	5,55	Female	-1,49406087602079	T3	7,32047141796585	8,76210096510765	-0,893615441722346	juni	6	5	Week	Friday	66	-6,39792130660727	0	PA_SNI	PA_SNI
34	primary	new	250	PA_SNI	2908	1	10	0	7	2018-07-01	3	1	4621	7	observed	21,3	15,3	0	1,75577518686517	3,85	-0,486006010217202	2	2	2	5,5	5,33	2	1	6	6	6	91	5,55	Female	-1,49406087602079	T3	9,12047141796585	8,76210096510765	-0,893615441722346	juli	7	0	Weekend	Sunday	36	-36,3979213066073	0	PA_SNI	PA_SNI
34	primary	new	250	PA_SNI	2911	1	9	0	5	2018-03-14	5	1	6133	0	observed	5,8	9,4	0	-1,06900570816536	4,1	-0,236006010217203	5	4	5	6	6	1	1	6	6	6	97	5,85	Female	-2,49406087602079	T1	-6,37952858203415	2,86210096510765	-0,893615441722346	maart	3	3	Week	Wednesday	80	7,60207869339273	0	PA_SNI	PA_SNI
34	primary	new	250	PA_SNI	2906	1	10	1	7	2018-06-29	1	1	8601	12	imputed	19,5	15,3	0	-0,636263995012639	3,9	-0,436006010217203	NA	NA	NA	NA	NA	NA	NA	NA	NA	NA	NA	NA	Female	-1,49406087602079	T3	7,32047141796585	8,76210096510765	-0,893615441722346	juni	6	5	Week	Friday	66	-6,39792130660727	0	PA_SNI	PA_SNI
34	primary	new	250	PA_SNI	2907	0	9	0	5	2018-03-12	3	1	10006	65	observed	10,3	2,6	1,8	2,0095715524814	3	-1,3360060102172	3	3	5	4	3,67	3	2,33	5	3	4	58	3,9	Male	-2,49406087602079	T1	-1,87952858203415	-3,93789903489235	0,906384558277654	maart	3	1	Week	Monday	85	12,6020786933927	0	PA_SNI	PA_SNI
34	primary	new	250	PA_SNI	2907	0	9	0	5	2018-03-14	5	1	10454	31	observed	5,8	9,4	0	2,0095715524814	3	-1,3360060102172	3	3	5	4	3,67	3	2,33	5	3	4	58	3,9	Male	-2,49406087602079	T1	-6,37952858203415	2,86210096510765	-0,893615441722346	maart	3	3	Week	Wednesday	80	7,60207869339273	0	PA_SNI	PA_SNI
34	primary	new	250	PA_SNI	2910	1	10	0	5	2018-03-11	2	1	7162	0	imputed	10,2	2,5	1	0,182041091357701	3,07711757945695	-1,25888843076025	NA	NA	NA	NA	NA	NA	NA	NA	NA	NA	NA	NA	Female	-1,49406087602079	T1	-1,97952858203415	-4,03789903489235	0,106384558277654	maart	3	0	Weekend	Sunday	91	18,6020786933927	0	PA_SNI	PA_SNI
34	primary	new	250	PA_SNI	2910	1	10	0	5	2018-03-10	1	1	3830	0	imputed	11,4	1,8	6,6	0,182041091357701	3,07711757945695	-1,25888843076025	NA	NA	NA	NA	NA	NA	NA	NA	NA	NA	NA	NA	Female	-1,49406087602079	T1	-0,77952858203415	-4,73789903489235	5,70638455827765	maart	3	6	Weekend	Saturday	89	16,6020786933927	0	PA_SNI	PA_SNI
34	primary	new	250	PA_SNI	2909	0	9	0	5	2018-03-12	3	1	19045	126	observed	10,3	2,6	1,8	1,10922091580064	4,2	-0,136006010217202	1	7	7	3	2,67	2,67	1	6	6	6	0	1	Male	-2,49406087602079	T1	-1,87952858203415	-3,93789903489235	0,906384558277654	maart	3	1	Week	Monday	85	12,6020786933927	0	PA_SNI	PA_SNI
34	primary	new	250	PA_SNI	2913	1	10	0	7	2018-07-02	4	1	1750	11	observed	20,6	15,3	0	-1,35080896029337	4,2	-0,136006010217202	NA	NA	NA	NA	NA	NA	NA	NA	NA	NA	NA	NA	Female	-1,49406087602079	T3	8,42047141796585	8,76210096510765	-0,893615441722346	juli	7	1	Week	Monday	40	-32,3979213066073	0	PA_SNI	PA_SNI
34	primary	new	250	PA_SNI	2909	0	9	0	6	2018-06-03	3	1	8478	32	observed	19,3	4,6	0	1,10922091580064	4,2	-0,136006010217202	7	4	4	6	6	4	5,33	6	6	6	100	6	Male	-2,49406087602079	T2	7,12047141796585	-1,93789903489235	-0,893615441722346	juni	6	0	Weekend	Sunday	79	6,60207869339273	0	PA_SNI	PA_SNI
34	primary	new	250	PA_SNI	2909	0	9	0	6	2018-06-05	5	1	6227	12	observed	16,7	7,9	0	1,10922091580064	4,2	-0,136006010217202	7	4	4	6	6	4	5,33	6	6	6	100	6	Male	-2,49406087602079	T2	4,52047141796585	1,36210096510765	-0,893615441722346	juni	6	2	Week	Tuesday	76	3,60207869339273	0	PA_SNI	PA_SNI
34	primary	new	250	PA_SNI	2909	0	9	0	6	2018-06-01	1	1	8960	12	observed	17,6	1,2	1,5	1,10922091580064	4,2	-0,136006010217202	7	4	4	6	6	4	5,33	6	6	6	100	6	Male	-2,49406087602079	T2	5,42047141796585	-5,33789903489235	0,606384558277654	juni	6	5	Week	Friday	90	17,6020786933927	0	PA_SNI	PA_SNI
34	primary	new	250	PA_SNI	2913	1	9	0	5	2018-03-11	2	1	11653	0	imputed	10,2	2,5	1	-1,35080896029337	4,2	-0,136006010217202	6	6	6	2,5	2	1	1	1	1	1	52	3,6	Female	-2,49406087602079	T1	-1,97952858203415	-4,03789903489235	0,106384558277654	maart	3	0	Weekend	Sunday	91	18,6020786933927	0	PA_SNI	PA_SNI
34	primary	new	250	PA_SNI	2913	1	9	0	5	2018-03-10	1	1	9863	9	observed	11,4	1,8	6,6	-1,35080896029337	4,2	-0,136006010217202	6	6	6	2,5	2	1	1	1	1	1	52	3,6	Female	-2,49406087602079	T1	-0,77952858203415	-4,73789903489235	5,70638455827765	maart	3	6	Weekend	Saturday	89	16,6020786933927	0	PA_SNI	PA_SNI
34	primary	new	250	PA_SNI	2913	1	10	0	6	2018-06-02	2	1	10292	37	imputed	17	0,1	1,2	-1,35080896029337	4,2	-0,136006010217202	NA	NA	NA	NA	NA	NA	NA	NA	NA	NA	74	4,7	Female	-1,49406087602079	T2	4,82047141796585	-6,43789903489235	0,306384558277654	juni	6	6	Weekend	Saturday	89	16,6020786933927	0	PA_SNI	PA_SNI
34	primary	new	250	PA_SNI	2905	0	10	1	7	2018-06-29	1	1	29732	224	observed	19,5	15,3	0	-0,0289469378503758	4,65	0,313993989782798	7	7	7	6	6	5	4,33	6	6	6	100	6	Male	-1,49406087602079	T3	7,32047141796585	8,76210096510765	-0,893615441722346	juni	6	5	Week	Friday	66	-6,39792130660727	1	PA_SNI	PA_SNI
34	primary	new	250	PA_SNI	2905	0	10	1	7	2018-06-30	2	1	8348	24	observed	21,3	15,3	0	-0,0289469378503758	4,65	0,313993989782798	7	7	7	6	6	5	4,33	6	6	6	100	6	Male	-1,49406087602079	T3	9,12047141796585	8,76210096510765	-0,893615441722346	juni	6	6	Weekend	Saturday	51	-21,3979213066073	0	PA_SNI	PA_SNI
34	primary	new	250	PA_SNI	2913	1	10	0	6	2018-06-03	3	1	12114	15	imputed	19,3	4,6	0	-1,35080896029337	4,2	-0,136006010217202	NA	NA	NA	NA	NA	NA	NA	NA	NA	NA	74	4,7	Female	-1,49406087602079	T2	7,12047141796585	-1,93789903489235	-0,893615441722346	juni	6	0	Weekend	Sunday	79	6,60207869339273	0	PA_SNI	PA_SNI
34	primary	new	250	PA_SNI	2913	1	10	0	6	2018-06-01	1	1	14297	0	imputed	17,6	1,2	1,5	-1,35080896029337	4,2	-0,136006010217202	NA	NA	NA	NA	NA	NA	NA	NA	NA	NA	74	4,7	Female	-1,49406087602079	T2	5,42047141796585	-5,33789903489235	0,606384558277654	juni	6	5	Week	Friday	90	17,6020786933927	0	PA_SNI	PA_SNI
34	primary	new	250	PA_SNI	2913	1	10	0	7	2018-06-30	2	1	11147	0	imputed	21,3	15,3	0	-1,35080896029337	4,2	-0,136006010217202	NA	NA	NA	NA	NA	NA	NA	NA	NA	NA	NA	NA	Female	-1,49406087602079	T3	9,12047141796585	8,76210096510765	-0,893615441722346	juni	6	6	Weekend	Saturday	51	-21,3979213066073	0	PA_SNI	PA_SNI
34	primary	new	250	PA_SNI	2910	1	10	0	5	2018-03-12	3	1	4999	0	imputed	10,3	2,6	1,8	0,182041091357701	3,07711757945695	-1,25888843076025	NA	NA	NA	NA	NA	NA	NA	NA	NA	NA	NA	NA	Female	-1,49406087602079	T1	-1,87952858203415	-3,93789903489235	0,906384558277654	maart	3	1	Week	Monday	85	12,6020786933927	0	PA_SNI	PA_SNI
34	primary	new	250	PA_SNI	2906	1	10	1	5	2018-03-10	1	1	17203	117	observed	11,4	1,8	6,6	-0,636263995012639	3,9	-0,436006010217203	4	4	3	5	5,33	3,67	1	6	5	5,5	81	5,05	Female	-1,49406087602079	T1	-0,77952858203415	-4,73789903489235	5,70638455827765	maart	3	6	Weekend	Saturday	89	16,6020786933927	0	PA_SNI	PA_SNI
34	primary	new	250	PA_SNI	2906	1	10	1	5	2018-03-11	2	1	5571	0	observed	10,2	2,5	1	-0,636263995012639	3,9	-0,436006010217203	4	4	3	5	5,33	3,67	1	6	5	5,5	81	5,05	Female	-1,49406087602079	T1	-1,97952858203415	-4,03789903489235	0,106384558277654	maart	3	0	Weekend	Sunday	91	18,6020786933927	0	PA_SNI	PA_SNI
34	primary	new	250	PA_SNI	2913	1	10	0	7	2018-07-03	5	1	2455	22	observed	19,6	15,3	0	-1,35080896029337	4,2	-0,136006010217202	NA	NA	NA	NA	NA	NA	NA	NA	NA	NA	NA	NA	Female	-1,49406087602079	T3	7,42047141796585	8,76210096510765	-0,893615441722346	juli	7	2	Week	Tuesday	60	-12,3979213066073	0	PA_SNI	PA_SNI
34	primary	new	250	PA_SNI	2913	1	10	0	7	2018-07-01	3	1	8965	4	imputed	21,3	15,3	0	-1,35080896029337	4,2	-0,136006010217202	NA	NA	NA	NA	NA	NA	NA	NA	NA	NA	NA	NA	Female	-1,49406087602079	T3	9,12047141796585	8,76210096510765	-0,893615441722346	juli	7	0	Weekend	Sunday	36	-36,3979213066073	0	PA_SNI	PA_SNI
34	primary	new	250	PA_SNI	2909	0	9	0	6	2018-06-04	4	1	22491	147	observed	18,2	4,9	0	1,10922091580064	4,2	-0,136006010217202	7	4	4	6	6	4	5,33	6	6	6	100	6	Male	-2,49406087602079	T2	6,02047141796585	-1,63789903489235	-0,893615441722346	juni	6	1	Week	Monday	82	9,60207869339273	0	PA_SNI	PA_SNI
34	primary	new	250	PA_SNI	2905	0	10	1	7	2018-07-03	5	1	23885	176	observed	19,6	15,3	0	-0,0289469378503758	4,65	0,313993989782798	7	7	7	6	6	5	4,33	6	6	6	100	6	Male	-1,49406087602079	T3	7,42047141796585	8,76210096510765	-0,893615441722346	juli	7	2	Week	Tuesday	60	-12,3979213066073	0	PA_SNI	PA_SNI
34	primary	new	250	PA_SNI	2905	0	10	1	7	2018-07-01	3	1	12631	34	observed	21,3	15,3	0	-0,0289469378503758	4,65	0,313993989782798	7	7	7	6	6	5	4,33	6	6	6	100	6	Male	-1,49406087602079	T3	9,12047141796585	8,76210096510765	-0,893615441722346	juli	7	0	Weekend	Sunday	36	-36,3979213066073	0	PA_SNI	PA_SNI
34	primary	new	250	PA_SNI	2909	0	9	0	7	2018-06-29	1	1	22487	193	observed	19,5	15,3	0	1,10922091580064	4,2	-0,136006010217202	7	7	7	6	5,67	1	1,67	6	6	6	100	6	Male	-2,49406087602079	T3	7,32047141796585	8,76210096510765	-0,893615441722346	juni	6	5	Week	Friday	66	-6,39792130660727	0	PA_SNI	PA_SNI
34	primary	new	250	PA_SNI	2909	0	9	0	7	2018-07-01	3	1	8337	20	observed	21,3	15,3	0	1,10922091580064	4,2	-0,136006010217202	7	7	7	6	5,67	1	1,67	6	6	6	100	6	Male	-2,49406087602079	T3	9,12047141796585	8,76210096510765	-0,893615441722346	juli	7	0	Weekend	Sunday	36	-36,3979213066073	0	PA_SNI	PA_SNI
34	primary	new	250	PA_SNI	2909	0	9	0	7	2018-07-03	5	1	15552	67	observed	19,6	15,3	0	1,10922091580064	4,2	-0,136006010217202	7	7	7	6	5,67	1	1,67	6	6	6	100	6	Male	-2,49406087602079	T3	7,42047141796585	8,76210096510765	-0,893615441722346	juli	7	2	Week	Tuesday	60	-12,3979213066073	0	PA_SNI	PA_SNI
34	primary	new	250	PA_SNI	2909	0	9	0	7	2018-07-02	4	1	12862	60	observed	20,6	15,3	0	1,10922091580064	4,2	-0,136006010217202	7	7	7	6	5,67	1	1,67	6	6	6	100	6	Male	-2,49406087602079	T3	8,42047141796585	8,76210096510765	-0,893615441722346	juli	7	1	Week	Monday	40	-32,3979213066073	0	PA_SNI	PA_SNI
34	primary	new	250	PA_SNI	2906	1	10	1	5	2018-03-14	5	1	11713	84	observed	5,8	9,4	0	-0,636263995012639	3,9	-0,436006010217203	4	4	3	5	5,33	3,67	1	6	5	5,5	81	5,05	Female	-1,49406087602079	T1	-6,37952858203415	2,86210096510765	-0,893615441722346	maart	3	3	Week	Wednesday	80	7,60207869339273	0	PA_SNI	PA_SNI
34	primary	new	250	PA_SNI	2913	1	10	0	7	2018-06-29	1	1	5256	32	imputed	19,5	15,3	0	-1,35080896029337	4,2	-0,136006010217202	NA	NA	NA	NA	NA	NA	NA	NA	NA	NA	NA	NA	Female	-1,49406087602079	T3	7,32047141796585	8,76210096510765	-0,893615441722346	juni	6	5	Week	Friday	66	-6,39792130660727	0	PA_SNI	PA_SNI
34	primary	new	250	PA_SNI	2906	1	10	1	6	2018-06-03	3	1	8609	11	observed	19,3	4,6	0	-0,636263995012639	3,9	-0,436006010217203	3	3	3	4,5	4,33	1,33	1	4	4	4	61	4,05	Female	-1,49406087602079	T2	7,12047141796585	-1,93789903489235	-0,893615441722346	juni	6	0	Weekend	Sunday	79	6,60207869339273	0	PA_SNI	PA_SNI
34	primary	new	250	PA_SNI	2909	0	9	0	6	2018-06-02	2	1	20133	118	observed	17	0,1	1,2	1,10922091580064	4,2	-0,136006010217202	7	4	4	6	6	4	5,33	6	6	6	100	6	Male	-2,49406087602079	T2	4,82047141796585	-6,43789903489235	0,306384558277654	juni	6	6	Weekend	Saturday	89	16,6020786933927	0	PA_SNI	PA_SNI
34	primary	new	250	PA_SNI	2909	0	9	0	7	2018-06-30	2	1	20057	76	imputed	21,3	15,3	0	1,10922091580064	4,2	-0,136006010217202	7	7	7	6	5,67	1	1,67	6	6	6	100	6	Male	-2,49406087602079	T3	9,12047141796585	8,76210096510765	-0,893615441722346	juni	6	6	Weekend	Saturday	51	-21,3979213066073	0	PA_SNI	PA_SNI
34	primary	new	250	PA_SNI	2906	1	10	1	6	2018-06-05	5	1	12459	49	observed	16,7	7,9	0	-0,636263995012639	3,9	-0,436006010217203	3	3	3	4,5	4,33	1,33	1	4	4	4	61	4,05	Female	-1,49406087602079	T2	4,52047141796585	1,36210096510765	-0,893615441722346	juni	6	2	Week	Tuesday	76	3,60207869339273	0	PA_SNI	PA_SNI
34	primary	new	250	PA_SNI	2906	1	10	1	7	2018-06-30	2	1	22238	17	imputed	21,3	15,3	0	-0,636263995012639	3,9	-0,436006010217203	NA	NA	NA	NA	NA	NA	NA	NA	NA	NA	NA	NA	Female	-1,49406087602079	T3	9,12047141796585	8,76210096510765	-0,893615441722346	juni	6	6	Weekend	Saturday	51	-21,3979213066073	0	PA_SNI	PA_SNI
34	primary	new	250	PA_SNI	2906	1	10	1	7	2018-07-01	3	1	15137	65	imputed	21,3	15,3	0	-0,636263995012639	3,9	-0,436006010217203	NA	NA	NA	NA	NA	NA	NA	NA	NA	NA	NA	NA	Female	-1,49406087602079	T3	9,12047141796585	8,76210096510765	-0,893615441722346	juli	7	0	Weekend	Sunday	36	-36,3979213066073	0	PA_SNI	PA_SNI
34	primary	new	250	PA_SNI	2905	0	10	1	7	2018-07-02	4	1	14013	71	observed	20,6	15,3	0	-0,0289469378503758	4,65	0,313993989782798	7	7	7	6	6	5	4,33	6	6	6	100	6	Male	-1,49406087602079	T3	8,42047141796585	8,76210096510765	-0,893615441722346	juli	7	1	Week	Monday	40	-32,3979213066073	0	PA_SNI	PA_SNI
34	primary	new	250	PA_SNI	2906	1	10	1	6	2018-06-04	4	1	20482	98	observed	18,2	4,9	0	-0,636263995012639	3,9	-0,436006010217203	3	3	3	4,5	4,33	1,33	1	4	4	4	61	4,05	Female	-1,49406087602079	T2	6,02047141796585	-1,63789903489235	-0,893615441722346	juni	6	1	Week	Monday	82	9,60207869339273	0	PA_SNI	PA_SNI
34	primary	new	250	PA_SNI	2906	1	10	1	5	2018-03-13	4	1	11404	17	observed	5,6	0	7,6	-0,636263995012639	3,9	-0,436006010217203	4	4	3	5	5,33	3,67	1	6	5	5,5	81	5,05	Female	-1,49406087602079	T1	-6,57952858203415	-6,53789903489235	6,70638455827765	maart	3	2	Week	Tuesday	92	19,6020786933927	0	PA_SNI	PA_SNI
34	primary	new	250	PA_SNI	2906	1	10	1	5	2018-03-12	3	1	22263	149	observed	10,3	2,6	1,8	-0,636263995012639	3,9	-0,436006010217203	4	4	3	5	5,33	3,67	1	6	5	5,5	81	5,05	Female	-1,49406087602079	T1	-1,87952858203415	-3,93789903489235	0,906384558277654	maart	3	1	Week	Monday	85	12,6020786933927	0	PA_SNI	PA_SNI
34	primary	new	250	PA_SNI	2906	1	10	1	6	2018-06-01	1	1	9136	7	observed	17,6	1,2	1,5	-0,636263995012639	3,9	-0,436006010217203	3	3	3	4,5	4,33	1,33	1	4	4	4	61	4,05	Female	-1,49406087602079	T2	5,42047141796585	-5,33789903489235	0,606384558277654	juni	6	5	Week	Friday	90	17,6020786933927	0	PA_SNI	PA_SNI
34	primary	new	250	PA_SNI	2906	1	10	1	6	2018-06-02	2	1	10112	15	observed	17	0,1	1,2	-0,636263995012639	3,9	-0,436006010217203	3	3	3	4,5	4,33	1,33	1	4	4	4	61	4,05	Female	-1,49406087602079	T2	4,82047141796585	-6,43789903489235	0,306384558277654	juni	6	6	Weekend	Saturday	89	16,6020786933927	0	PA_SNI	PA_SNI
34	primary	new	251	PA_SNI	2916	0	11	0	7	2018-06-29	1	1	19583	176	observed	19,5	15,3	0	-0,395217659039999	5,2	0,863993989782798	NA	NA	NA	NA	NA	NA	NA	NA	NA	NA	NA	NA	Male	-0,494060876020788	T3	7,32047141796585	8,76210096510765	-0,893615441722346	juni	6	5	Week	Friday	66	-6,39792130660727	0	PA_SNI	PA_SNI
34	primary	new	251	PA_SNI	2916	0	11	0	6	2018-06-01	1	1	9635	0	imputed	17,6	1,2	1,5	-0,395217659039999	5,2	0,863993989782798	NA	NA	NA	NA	NA	NA	NA	NA	NA	NA	100	6	Male	-0,494060876020788	T2	5,42047141796585	-5,33789903489235	0,606384558277654	juni	6	5	Week	Friday	90	17,6020786933927	0	PA_SNI	PA_SNI
34	primary	new	251	PA_SNI	2916	0	11	0	6	2018-06-03	3	1	13020	91	imputed	19,3	4,6	0	-0,395217659039999	5,2	0,863993989782798	NA	NA	NA	NA	NA	NA	NA	NA	NA	NA	100	6	Male	-0,494060876020788	T2	7,12047141796585	-1,93789903489235	-0,893615441722346	juni	6	0	Weekend	Sunday	79	6,60207869339273	0	PA_SNI	PA_SNI
34	primary	new	251	PA_SNI	2920	1	10	0	7	2018-06-29	1	1	16766	116	observed	19,5	15,3	0	-2,84234697570394	5,1	0,763993989782797	NA	NA	NA	NA	NA	NA	NA	NA	NA	NA	91	5,55	Female	-1,49406087602079	T3	7,32047141796585	8,76210096510765	-0,893615441722346	juni	6	5	Week	Friday	66	-6,39792130660727	0	PA_SNI	PA_SNI
34	primary	new	251	PA_SNI	2921	0	11	0	5	2018-03-11	2	1	4383	8	observed	10,2	2,5	1	0,673401160382321	4,1	-0,236006010217203	2	4	0	5	4	4	1,67	6	6	6	100	6	Male	-0,494060876020788	T1	-1,97952858203415	-4,03789903489235	0,106384558277654	maart	3	0	Weekend	Sunday	91	18,6020786933927	0	PA_SNI	PA_SNI
34	primary	new	251	PA_SNI	2921	0	11	0	5	2018-03-12	3	1	8532	40	observed	10,3	2,6	1,8	0,673401160382321	4,1	-0,236006010217203	2	4	0	5	4	4	1,67	6	6	6	100	6	Male	-0,494060876020788	T1	-1,87952858203415	-3,93789903489235	0,906384558277654	maart	3	1	Week	Monday	85	12,6020786933927	0	PA_SNI	PA_SNI
34	primary	new	251	PA_SNI	2916	0	11	0	6	2018-06-02	2	1	14579	0	imputed	17	0,1	1,2	-0,395217659039999	5,2	0,863993989782798	NA	NA	NA	NA	NA	NA	NA	NA	NA	NA	100	6	Male	-0,494060876020788	T2	4,82047141796585	-6,43789903489235	0,306384558277654	juni	6	6	Weekend	Saturday	89	16,6020786933927	0	PA_SNI	PA_SNI
34	primary	new	251	PA_SNI	2921	0	11	0	5	2018-03-14	5	1	11489	80	observed	5,8	9,4	0	0,673401160382321	4,1	-0,236006010217203	2	4	0	5	4	4	1,67	6	6	6	100	6	Male	-0,494060876020788	T1	-6,37952858203415	2,86210096510765	-0,893615441722346	maart	3	3	Week	Wednesday	80	7,60207869339273	0	PA_SNI	PA_SNI
34	primary	new	251	PA_SNI	2920	1	10	0	6	2018-06-04	4	1	21636	128	observed	18,2	4,9	0	-2,84234697570394	5,1	0,763993989782797	4	2	1	5	6	2,67	1,67	5	5	5	92	5,6	Female	-1,49406087602079	T2	6,02047141796585	-1,63789903489235	-0,893615441722346	juni	6	1	Week	Monday	82	9,60207869339273	0	PA_SNI	PA_SNI
34	primary	new	251	PA_SNI	2920	1	10	0	6	2018-06-02	2	1	14571	84	observed	17	0,1	1,2	-2,84234697570394	5,1	0,763993989782797	4	2	1	5	6	2,67	1,67	5	5	5	92	5,6	Female	-1,49406087602079	T2	4,82047141796585	-6,43789903489235	0,306384558277654	juni	6	6	Weekend	Saturday	89	16,6020786933927	0	PA_SNI	PA_SNI
34	primary	new	251	PA_SNI	2921	0	11	0	5	2018-03-10	1	1	12652	106	observed	11,4	1,8	6,6	0,673401160382321	4,1	-0,236006010217203	2	4	0	5	4	4	1,67	6	6	6	100	6	Male	-0,494060876020788	T1	-0,77952858203415	-4,73789903489235	5,70638455827765	maart	3	6	Weekend	Saturday	89	16,6020786933927	0	PA_SNI	PA_SNI
34	primary	new	251	PA_SNI	2920	1	10	0	7	2018-07-01	3	1	6820	16	observed	21,3	15,3	0	-2,84234697570394	5,1	0,763993989782797	NA	NA	NA	NA	NA	NA	NA	NA	NA	NA	91	5,55	Female	-1,49406087602079	T3	9,12047141796585	8,76210096510765	-0,893615441722346	juli	7	0	Weekend	Sunday	36	-36,3979213066073	0	PA_SNI	PA_SNI
34	primary	new	251	PA_SNI	2917	1	10	0	6	2018-06-03	3	1	10354	0	imputed	19,3	4,6	0	1,06810300991198	3,75966898918759	-0,576337021029614	NA	NA	NA	NA	NA	NA	NA	NA	NA	NA	100	6	Female	-1,49406087602079	T2	7,12047141796585	-1,93789903489235	-0,893615441722346	juni	6	0	Weekend	Sunday	79	6,60207869339273	0	PA_SNI	PA_SNI
34	primary	new	251	PA_SNI	2917	1	10	0	7	2018-06-30	2	1	17813	0	imputed	21,3	15,3	0	1,06810300991198	3,75966898918759	-0,576337021029614	NA	NA	NA	NA	NA	NA	NA	NA	NA	NA	NA	NA	Female	-1,49406087602079	T3	9,12047141796585	8,76210096510765	-0,893615441722346	juni	6	6	Weekend	Saturday	51	-21,3979213066073	0	PA_SNI	PA_SNI
34	primary	new	251	PA_SNI	2919	1	11	0	6	2018-06-01	1	1	10200	39	imputed	17,6	1,2	1,5	0,28847591575575	4,4	0,0639939897827979	2	1	1	4	4,67	1	1	6	2	4	72	4,6	Female	-0,494060876020788	T2	5,42047141796585	-5,33789903489235	0,606384558277654	juni	6	5	Week	Friday	90	17,6020786933927	0	PA_SNI	PA_SNI
34	primary	new	251	PA_SNI	2919	1	11	0	7	2018-07-01	3	1	4000	0	observed	21,3	15,3	0	0,28847591575575	4,4	0,0639939897827979	1	1	1	2,5	4,67	1	1	2	4	3	66	4,3	Female	-0,494060876020788	T3	9,12047141796585	8,76210096510765	-0,893615441722346	juli	7	0	Weekend	Sunday	36	-36,3979213066073	0	PA_SNI	PA_SNI
34	primary	new	251	PA_SNI	2919	1	11	0	7	2018-06-29	1	1	16166	77	observed	19,5	15,3	0	0,28847591575575	4,4	0,0639939897827979	1	1	1	2,5	4,67	1	1	2	4	3	66	4,3	Female	-0,494060876020788	T3	7,32047141796585	8,76210096510765	-0,893615441722346	juni	6	5	Week	Friday	66	-6,39792130660727	0	PA_SNI	PA_SNI
34	primary	new	251	PA_SNI	2919	1	11	0	7	2018-06-30	2	1	2768	54	imputed	21,3	15,3	0	0,28847591575575	4,4	0,0639939897827979	1	1	1	2,5	4,67	1	1	2	4	3	66	4,3	Female	-0,494060876020788	T3	9,12047141796585	8,76210096510765	-0,893615441722346	juni	6	6	Weekend	Saturday	51	-21,3979213066073	0	PA_SNI	PA_SNI
34	primary	new	251	PA_SNI	2916	0	11	0	7	2018-07-01	3	1	9227	25	observed	21,3	15,3	0	-0,395217659039999	5,2	0,863993989782798	NA	NA	NA	NA	NA	NA	NA	NA	NA	NA	NA	NA	Male	-0,494060876020788	T3	9,12047141796585	8,76210096510765	-0,893615441722346	juli	7	0	Weekend	Sunday	36	-36,3979213066073	0	PA_SNI	PA_SNI
34	primary	new	251	PA_SNI	2916	0	11	0	7	2018-06-30	2	1	8518	23	observed	21,3	15,3	0	-0,395217659039999	5,2	0,863993989782798	NA	NA	NA	NA	NA	NA	NA	NA	NA	NA	NA	NA	Male	-0,494060876020788	T3	9,12047141796585	8,76210096510765	-0,893615441722346	juni	6	6	Weekend	Saturday	51	-21,3979213066073	0	PA_SNI	PA_SNI
34	primary	new	251	PA_SNI	2917	1	10	0	5	2018-03-12	3	1	18699	0	imputed	10,3	2,6	1,8	1,06810300991198	3,75966898918759	-0,576337021029614	NA	NA	NA	NA	NA	NA	NA	NA	NA	NA	NA	NA	Female	-1,49406087602079	T1	-1,87952858203415	-3,93789903489235	0,906384558277654	maart	3	1	Week	Monday	85	12,6020786933927	0	PA_SNI	PA_SNI
34	primary	new	251	PA_SNI	2917	1	10	0	5	2018-03-10	1	1	7981	0	imputed	11,4	1,8	6,6	1,06810300991198	3,75966898918759	-0,576337021029614	NA	NA	NA	NA	NA	NA	NA	NA	NA	NA	NA	NA	Female	-1,49406087602079	T1	-0,77952858203415	-4,73789903489235	5,70638455827765	maart	3	6	Weekend	Saturday	89	16,6020786933927	0	PA_SNI	PA_SNI
34	primary	new	251	PA_SNI	2917	1	10	0	5	2018-03-11	2	1	7930	0	imputed	10,2	2,5	1	1,06810300991198	3,75966898918759	-0,576337021029614	NA	NA	NA	NA	NA	NA	NA	NA	NA	NA	NA	NA	Female	-1,49406087602079	T1	-1,97952858203415	-4,03789903489235	0,106384558277654	maart	3	0	Weekend	Sunday	91	18,6020786933927	0	PA_SNI	PA_SNI
34	primary	new	251	PA_SNI	2920	1	10	0	7	2018-06-30	2	1	7424	38	observed	21,3	15,3	0	-2,84234697570394	5,1	0,763993989782797	NA	NA	NA	NA	NA	NA	NA	NA	NA	NA	91	5,55	Female	-1,49406087602079	T3	9,12047141796585	8,76210096510765	-0,893615441722346	juni	6	6	Weekend	Saturday	51	-21,3979213066073	0	PA_SNI	PA_SNI
34	primary	new	251	PA_SNI	2917	1	10	0	6	2018-06-01	1	1	12237	0	imputed	17,6	1,2	1,5	1,06810300991198	3,75966898918759	-0,576337021029614	NA	NA	NA	NA	NA	NA	NA	NA	NA	NA	100	6	Female	-1,49406087602079	T2	5,42047141796585	-5,33789903489235	0,606384558277654	juni	6	5	Week	Friday	90	17,6020786933927	0	PA_SNI	PA_SNI
34	primary	new	251	PA_SNI	2920	1	10	0	6	2018-06-01	1	1	9010	12	observed	17,6	1,2	1,5	-2,84234697570394	5,1	0,763993989782797	4	2	1	5	6	2,67	1,67	5	5	5	92	5,6	Female	-1,49406087602079	T2	5,42047141796585	-5,33789903489235	0,606384558277654	juni	6	5	Week	Friday	90	17,6020786933927	0	PA_SNI	PA_SNI
34	primary	new	251	PA_SNI	2926	1	11	1	7	2018-06-29	1	1	6342	227	imputed	19,5	15,3	0	-0,956860263894222	3,1	-1,2360060102172	NA	NA	NA	NA	NA	NA	NA	NA	NA	NA	NA	NA	Female	-0,494060876020788	T3	7,32047141796585	8,76210096510765	-0,893615441722346	juni	6	5	Week	Friday	66	-6,39792130660727	0	PA_SNI	PA_SNI
34	primary	new	251	PA_SNI	2926	1	11	1	7	2018-07-01	3	1	7290	87	imputed	21,3	15,3	0	-0,956860263894222	3,1	-1,2360060102172	NA	NA	NA	NA	NA	NA	NA	NA	NA	NA	NA	NA	Female	-0,494060876020788	T3	9,12047141796585	8,76210096510765	-0,893615441722346	juli	7	0	Weekend	Sunday	36	-36,3979213066073	0	PA_SNI	PA_SNI
34	primary	new	251	PA_SNI	2926	1	11	1	7	2018-06-30	2	1	15688	107	imputed	21,3	15,3	0	-0,956860263894222	3,1	-1,2360060102172	NA	NA	NA	NA	NA	NA	NA	NA	NA	NA	NA	NA	Female	-0,494060876020788	T3	9,12047141796585	8,76210096510765	-0,893615441722346	juni	6	6	Weekend	Saturday	51	-21,3979213066073	0	PA_SNI	PA_SNI
34	primary	new	251	PA_SNI	2927	0	11	0	5	2018-03-10	1	1	18967	141	observed	11,4	1,8	6,6	-0,777470482678948	4,1	-0,236006010217203	7	6	5	5,5	5,67	2,67	1,67	4	6	5	63	4,15	Male	-0,494060876020788	T1	-0,77952858203415	-4,73789903489235	5,70638455827765	maart	3	6	Weekend	Saturday	89	16,6020786933927	0	PA_SNI	PA_SNI
34	primary	new	251	PA_SNI	2927	0	11	0	5	2018-03-12	3	1	15050	58	observed	10,3	2,6	1,8	-0,777470482678948	4,1	-0,236006010217203	7	6	5	5,5	5,67	2,67	1,67	4	6	5	63	4,15	Male	-0,494060876020788	T1	-1,87952858203415	-3,93789903489235	0,906384558277654	maart	3	1	Week	Monday	85	12,6020786933927	0	PA_SNI	PA_SNI
34	primary	new	251	PA_SNI	2920	1	10	0	5	2018-03-11	2	1	9474	67	observed	10,2	2,5	1	-2,84234697570394	5,1	0,763993989782797	3	1	2	6	6	1,33	1	6	6	6	99	5,95	Female	-1,49406087602079	T1	-1,97952858203415	-4,03789903489235	0,106384558277654	maart	3	0	Weekend	Sunday	91	18,6020786933927	0	PA_SNI	PA_SNI
34	primary	new	251	PA_SNI	2920	1	10	0	5	2018-03-13	4	1	9219	23	observed	5,6	0	7,6	-2,84234697570394	5,1	0,763993989782797	3	1	2	6	6	1,33	1	6	6	6	99	5,95	Female	-1,49406087602079	T1	-6,57952858203415	-6,53789903489235	6,70638455827765	maart	3	2	Week	Tuesday	92	19,6020786933927	0	PA_SNI	PA_SNI
34	primary	new	251	PA_SNI	2920	1	10	0	5	2018-03-12	3	1	12188	49	observed	10,3	2,6	1,8	-2,84234697570394	5,1	0,763993989782797	3	1	2	6	6	1,33	1	6	6	6	99	5,95	Female	-1,49406087602079	T1	-1,87952858203415	-3,93789903489235	0,906384558277654	maart	3	1	Week	Monday	85	12,6020786933927	0	PA_SNI	PA_SNI
34	primary	new	251	PA_SNI	2920	1	10	0	5	2018-03-10	1	1	17496	112	observed	11,4	1,8	6,6	-2,84234697570394	5,1	0,763993989782797	3	1	2	6	6	1,33	1	6	6	6	99	5,95	Female	-1,49406087602079	T1	-0,77952858203415	-4,73789903489235	5,70638455827765	maart	3	6	Weekend	Saturday	89	16,6020786933927	0	PA_SNI	PA_SNI
34	primary	new	251	PA_SNI	2920	1	10	0	5	2018-03-14	5	1	13529	46	observed	5,8	9,4	0	-2,84234697570394	5,1	0,763993989782797	3	1	2	6	6	1,33	1	6	6	6	99	5,95	Female	-1,49406087602079	T1	-6,37952858203415	2,86210096510765	-0,893615441722346	maart	3	3	Week	Wednesday	80	7,60207869339273	0	PA_SNI	PA_SNI
34	primary	new	251	PA_SNI	2917	1	10	0	6	2018-06-02	2	1	15610	0	imputed	17	0,1	1,2	1,06810300991198	3,75966898918759	-0,576337021029614	NA	NA	NA	NA	NA	NA	NA	NA	NA	NA	100	6	Female	-1,49406087602079	T2	4,82047141796585	-6,43789903489235	0,306384558277654	juni	6	6	Weekend	Saturday	89	16,6020786933927	0	PA_SNI	PA_SNI
34	primary	new	251	PA_SNI	2920	1	10	0	6	2018-06-03	3	1	8421	17	observed	19,3	4,6	0	-2,84234697570394	5,1	0,763993989782797	4	2	1	5	6	2,67	1,67	5	5	5	92	5,6	Female	-1,49406087602079	T2	7,12047141796585	-1,93789903489235	-0,893615441722346	juni	6	0	Weekend	Sunday	79	6,60207869339273	0	PA_SNI	PA_SNI
34	primary	new	251	PA_SNI	2919	1	11	0	6	2018-06-03	3	1	1000	15	imputed	19,3	4,6	0	0,28847591575575	4,4	0,0639939897827979	2	1	1	4	4,67	1	1	6	2	4	72	4,6	Female	-0,494060876020788	T2	7,12047141796585	-1,93789903489235	-0,893615441722346	juni	6	0	Weekend	Sunday	79	6,60207869339273	0	PA_SNI	PA_SNI
34	primary	new	251	PA_SNI	2919	1	11	0	6	2018-06-02	2	1	1229	0	imputed	17	0,1	1,2	0,28847591575575	4,4	0,0639939897827979	2	1	1	4	4,67	1	1	6	2	4	72	4,6	Female	-0,494060876020788	T2	4,82047141796585	-6,43789903489235	0,306384558277654	juni	6	6	Weekend	Saturday	89	16,6020786933927	0	PA_SNI	PA_SNI
34	primary	new	251	PA_SNI	2919	1	11	0	6	2018-06-04	4	1	2118	0	observed	18,2	4,9	0	0,28847591575575	4,4	0,0639939897827979	2	1	1	4	4,67	1	1	6	2	4	72	4,6	Female	-0,494060876020788	T2	6,02047141796585	-1,63789903489235	-0,893615441722346	juni	6	1	Week	Monday	82	9,60207869339273	0	PA_SNI	PA_SNI
34	primary	new	251	PA_SNI	2916	0	10	0	5	2018-03-10	1	1	17461	105	observed	11,4	1,8	6,6	-0,395217659039999	5,2	0,863993989782798	3	3	3	5	5,33	1,67	1	6	6	6	96	5,8	Male	-1,49406087602079	T1	-0,77952858203415	-4,73789903489235	5,70638455827765	maart	3	6	Weekend	Saturday	89	16,6020786933927	0	PA_SNI	PA_SNI
34	primary	new	251	PA_SNI	2916	0	10	0	5	2018-03-11	2	1	3859	0	observed	10,2	2,5	1	-0,395217659039999	5,2	0,863993989782798	3	3	3	5	5,33	1,67	1	6	6	6	96	5,8	Male	-1,49406087602079	T1	-1,97952858203415	-4,03789903489235	0,106384558277654	maart	3	0	Weekend	Sunday	91	18,6020786933927	0	PA_SNI	PA_SNI
34	primary	new	251	PA_SNI	2925	0	11	0	7	2018-06-30	2	1	6911	31	observed	21,3	15,3	0	-2,79360393253533	4,15	-0,186006010217202	5	3	5	3	3,67	1,33	1,33	3	2	2,5	88	5,4	Male	-0,494060876020788	T3	9,12047141796585	8,76210096510765	-0,893615441722346	juni	6	6	Weekend	Saturday	51	-21,3979213066073	0	PA_SNI	PA_SNI
34	primary	new	251	PA_SNI	2917	1	10	0	7	2018-06-29	1	1	9802	0	imputed	19,5	15,3	0	1,06810300991198	3,75966898918759	-0,576337021029614	NA	NA	NA	NA	NA	NA	NA	NA	NA	NA	NA	NA	Female	-1,49406087602079	T3	7,32047141796585	8,76210096510765	-0,893615441722346	juni	6	5	Week	Friday	66	-6,39792130660727	0	PA_SNI	PA_SNI
34	primary	new	251	PA_SNI	2926	1	10	1	5	2018-03-11	2	1	3101	294	imputed	10,2	2,5	1	-0,956860263894222	3,1	-1,2360060102172	2	2	2	6	5,33	1	1	6	6	6	61	4,05	Female	-1,49406087602079	T1	-1,97952858203415	-4,03789903489235	0,106384558277654	maart	3	0	Weekend	Sunday	91	18,6020786933927	0	PA_SNI	PA_SNI
34	primary	new	251	PA_SNI	2926	1	10	1	5	2018-03-13	4	1	8543	12	observed	5,6	0	7,6	-0,956860263894222	3,1	-1,2360060102172	2	2	2	6	5,33	1	1	6	6	6	61	4,05	Female	-1,49406087602079	T1	-6,57952858203415	-6,53789903489235	6,70638455827765	maart	3	2	Week	Tuesday	92	19,6020786933927	0	PA_SNI	PA_SNI
34	primary	new	251	PA_SNI	2926	1	10	1	5	2018-03-12	3	1	2975	144	imputed	10,3	2,6	1,8	-0,956860263894222	3,1	-1,2360060102172	2	2	2	6	5,33	1	1	6	6	6	61	4,05	Female	-1,49406087602079	T1	-1,87952858203415	-3,93789903489235	0,906384558277654	maart	3	1	Week	Monday	85	12,6020786933927	0	PA_SNI	PA_SNI
34	primary	new	251	PA_SNI	2926	1	11	1	6	2018-06-03	3	1	1000	91	imputed	19,3	4,6	0	-0,956860263894222	3,1	-1,2360060102172	5	3	5	6	6	1	1	6	6	6	94	5,7	Female	-0,494060876020788	T2	7,12047141796585	-1,93789903489235	-0,893615441722346	juni	6	0	Weekend	Sunday	79	6,60207869339273	0	PA_SNI	PA_SNI
34	primary	new	251	PA_SNI	2920	1	10	0	6	2018-06-05	5	1	15715	86	observed	16,7	7,9	0	-2,84234697570394	5,1	0,763993989782797	4	2	1	5	6	2,67	1,67	5	5	5	92	5,6	Female	-1,49406087602079	T2	4,52047141796585	1,36210096510765	-0,893615441722346	juni	6	2	Week	Tuesday	76	3,60207869339273	0	PA_SNI	PA_SNI
34	primary	new	251	PA_SNI	2926	1	11	1	6	2018-06-01	1	1	7517	21	observed	17,6	1,2	1,5	-0,956860263894222	3,1	-1,2360060102172	5	3	5	6	6	1	1	6	6	6	94	5,7	Female	-0,494060876020788	T2	5,42047141796585	-5,33789903489235	0,606384558277654	juni	6	5	Week	Friday	90	17,6020786933927	0	PA_SNI	PA_SNI
34	primary	new	251	PA_SNI	2926	1	11	1	6	2018-06-02	2	1	19302	183	imputed	17	0,1	1,2	-0,956860263894222	3,1	-1,2360060102172	5	3	5	6	6	1	1	6	6	6	94	5,7	Female	-0,494060876020788	T2	4,82047141796585	-6,43789903489235	0,306384558277654	juni	6	6	Weekend	Saturday	89	16,6020786933927	0	PA_SNI	PA_SNI
34	primary	new	251	PA_SNI	2926	1	11	1	6	2018-06-04	4	1	27209	192	observed	18,2	4,9	0	-0,956860263894222	3,1	-1,2360060102172	5	3	5	6	6	1	1	6	6	6	94	5,7	Female	-0,494060876020788	T2	6,02047141796585	-1,63789903489235	-0,893615441722346	juni	6	1	Week	Monday	82	9,60207869339273	0	PA_SNI	PA_SNI
34	primary	new	251	PA_SNI	2923	0	11	0	6	2018-06-01	1	1	6431	17	observed	17,6	1,2	1,5	1,40360644680509	2,95	-1,3860060102172	2	6	4	5	4	1	1	4	4	4	74	4,7	Male	-0,494060876020788	T2	5,42047141796585	-5,33789903489235	0,606384558277654	juni	6	5	Week	Friday	90	17,6020786933927	0	PA_SNI	PA_SNI
34	primary	new	251	PA_SNI	2923	0	11	0	6	2018-06-05	5	1	14638	99	observed	16,7	7,9	0	1,40360644680509	2,95	-1,3860060102172	2	6	4	5	4	1	1	4	4	4	74	4,7	Male	-0,494060876020788	T2	4,52047141796585	1,36210096510765	-0,893615441722346	juni	6	2	Week	Tuesday	76	3,60207869339273	0	PA_SNI	PA_SNI
34	primary	new	251	PA_SNI	2923	0	11	0	6	2018-06-02	2	1	7745	74	observed	17	0,1	1,2	1,40360644680509	2,95	-1,3860060102172	2	6	4	5	4	1	1	4	4	4	74	4,7	Male	-0,494060876020788	T2	4,82047141796585	-6,43789903489235	0,306384558277654	juni	6	6	Weekend	Saturday	89	16,6020786933927	0	PA_SNI	PA_SNI
34	primary	new	251	PA_SNI	2923	0	11	0	6	2018-06-03	3	1	11327	72	imputed	19,3	4,6	0	1,40360644680509	2,95	-1,3860060102172	2	6	4	5	4	1	1	4	4	4	74	4,7	Male	-0,494060876020788	T2	7,12047141796585	-1,93789903489235	-0,893615441722346	juni	6	0	Weekend	Sunday	79	6,60207869339273	0	PA_SNI	PA_SNI
34	primary	new	251	PA_SNI	2926	1	10	1	5	2018-03-10	1	1	9269	29	observed	11,4	1,8	6,6	-0,956860263894222	3,1	-1,2360060102172	2	2	2	6	5,33	1	1	6	6	6	61	4,05	Female	-1,49406087602079	T1	-0,77952858203415	-4,73789903489235	5,70638455827765	maart	3	6	Weekend	Saturday	89	16,6020786933927	0	PA_SNI	PA_SNI
34	primary	new	251	PA_SNI	2923	0	11	0	7	2018-07-02	4	1	5025	17	observed	20,6	15,3	0	1,40360644680509	2,95	-1,3860060102172	7	6	3	4	4	4	4	4	3	3,5	100	6	Male	-0,494060876020788	T3	8,42047141796585	8,76210096510765	-0,893615441722346	juli	7	1	Week	Monday	40	-32,3979213066073	0	PA_SNI	PA_SNI
34	primary	new	251	PA_SNI	2923	0	11	0	7	2018-06-30	2	1	13796	36	imputed	21,3	15,3	0	1,40360644680509	2,95	-1,3860060102172	7	6	3	4	4	4	4	4	3	3,5	100	6	Male	-0,494060876020788	T3	9,12047141796585	8,76210096510765	-0,893615441722346	juni	6	6	Weekend	Saturday	51	-21,3979213066073	0	PA_SNI	PA_SNI
34	primary	new	251	PA_SNI	2921	0	11	0	5	2018-03-13	4	1	14905	117	observed	5,6	0	7,6	0,673401160382321	4,1	-0,236006010217203	2	4	0	5	4	4	1,67	6	6	6	100	6	Male	-0,494060876020788	T1	-6,57952858203415	-6,53789903489235	6,70638455827765	maart	3	2	Week	Tuesday	92	19,6020786933927	0	PA_SNI	PA_SNI
34	primary	new	251	PA_SNI	2921	0	11	0	6	2018-06-01	1	1	11856	92	observed	17,6	1,2	1,5	0,673401160382321	4,1	-0,236006010217203	4	7	7	6	6	6	6	6	6	6	100	6	Male	-0,494060876020788	T2	5,42047141796585	-5,33789903489235	0,606384558277654	juni	6	5	Week	Friday	90	17,6020786933927	0	PA_SNI	PA_SNI
34	primary	new	251	PA_SNI	2926	1	11	1	6	2018-06-05	5	1	27096	222	observed	16,7	7,9	0	-0,956860263894222	3,1	-1,2360060102172	5	3	5	6	6	1	1	6	6	6	94	5,7	Female	-0,494060876020788	T2	4,52047141796585	1,36210096510765	-0,893615441722346	juni	6	2	Week	Tuesday	76	3,60207869339273	0	PA_SNI	PA_SNI
34	primary	new	251	PA_SNI	2919	1	11	0	5	2018-03-12	3	1	12057	52	observed	10,3	2,6	1,8	0,28847591575575	4,4	0,0639939897827979	7	3	7	4	3,33	1	1	5	4	4,5	67	4,35	Female	-0,494060876020788	T1	-1,87952858203415	-3,93789903489235	0,906384558277654	maart	3	1	Week	Monday	85	12,6020786933927	0	PA_SNI	PA_SNI
34	primary	new	251	PA_SNI	2919	1	11	0	5	2018-03-10	1	1	2503	0	observed	11,4	1,8	6,6	0,28847591575575	4,4	0,0639939897827979	7	3	7	4	3,33	1	1	5	4	4,5	67	4,35	Female	-0,494060876020788	T1	-0,77952858203415	-4,73789903489235	5,70638455827765	maart	3	6	Weekend	Saturday	89	16,6020786933927	0	PA_SNI	PA_SNI
34	primary	new	251	PA_SNI	2919	1	11	0	5	2018-03-11	2	1	3597	0	observed	10,2	2,5	1	0,28847591575575	4,4	0,0639939897827979	7	3	7	4	3,33	1	1	5	4	4,5	67	4,35	Female	-0,494060876020788	T1	-1,97952858203415	-4,03789903489235	0,106384558277654	maart	3	0	Weekend	Sunday	91	18,6020786933927	0	PA_SNI	PA_SNI
34	primary	new	251	PA_SNI	2922	0	11	0	6	2018-06-01	1	1	17927	111	observed	17,6	1,2	1,5	0,329275984036322	3	-1,3360060102172	7	7	1	3	3	3	3	4	3	3,5	62	4,1	Male	-0,494060876020788	T2	5,42047141796585	-5,33789903489235	0,606384558277654	juni	6	5	Week	Friday	90	17,6020786933927	0	PA_SNI	PA_SNI
34	primary	new	251	PA_SNI	2922	0	11	0	6	2018-06-04	4	1	22429	139	observed	18,2	4,9	0	0,329275984036322	3	-1,3360060102172	7	7	1	3	3	3	3	4	3	3,5	62	4,1	Male	-0,494060876020788	T2	6,02047141796585	-1,63789903489235	-0,893615441722346	juni	6	1	Week	Monday	82	9,60207869339273	0	PA_SNI	PA_SNI
34	primary	new	251	PA_SNI	2922	0	11	0	6	2018-06-03	3	1	13661	81	observed	19,3	4,6	0	0,329275984036322	3	-1,3360060102172	7	7	1	3	3	3	3	4	3	3,5	62	4,1	Male	-0,494060876020788	T2	7,12047141796585	-1,93789903489235	-0,893615441722346	juni	6	0	Weekend	Sunday	79	6,60207869339273	0	PA_SNI	PA_SNI
34	primary	new	251	PA_SNI	2922	0	11	0	6	2018-06-02	2	1	23632	168	observed	17	0,1	1,2	0,329275984036322	3	-1,3360060102172	7	7	1	3	3	3	3	4	3	3,5	62	4,1	Male	-0,494060876020788	T2	4,82047141796585	-6,43789903489235	0,306384558277654	juni	6	6	Weekend	Saturday	89	16,6020786933927	0	PA_SNI	PA_SNI
34	primary	new	251	PA_SNI	2923	0	11	0	7	2018-06-29	1	1	14152	56	imputed	19,5	15,3	0	1,40360644680509	2,95	-1,3860060102172	7	6	3	4	4	4	4	4	3	3,5	100	6	Male	-0,494060876020788	T3	7,32047141796585	8,76210096510765	-0,893615441722346	juni	6	5	Week	Friday	66	-6,39792130660727	0	PA_SNI	PA_SNI
34	primary	new	251	PA_SNI	2922	0	11	0	7	2018-07-01	3	1	6513	252	imputed	21,3	15,3	0	0,329275984036322	3	-1,3360060102172	NA	NA	NA	NA	NA	NA	NA	NA	NA	NA	58	3,9	Male	-0,494060876020788	T3	9,12047141796585	8,76210096510765	-0,893615441722346	juli	7	0	Weekend	Sunday	36	-36,3979213066073	0	PA_SNI	PA_SNI
34	primary	new	251	PA_SNI	2922	0	11	0	7	2018-06-30	2	1	4626	198	imputed	21,3	15,3	0	0,329275984036322	3	-1,3360060102172	NA	NA	NA	NA	NA	NA	NA	NA	NA	NA	58	3,9	Male	-0,494060876020788	T3	9,12047141796585	8,76210096510765	-0,893615441722346	juni	6	6	Weekend	Saturday	51	-21,3979213066073	0	PA_SNI	PA_SNI
34	primary	new	251	PA_SNI	2922	0	11	0	7	2018-06-29	1	1	23579	230	observed	19,5	15,3	0	0,329275984036322	3	-1,3360060102172	NA	NA	NA	NA	NA	NA	NA	NA	NA	NA	58	3,9	Male	-0,494060876020788	T3	7,32047141796585	8,76210096510765	-0,893615441722346	juni	6	5	Week	Friday	66	-6,39792130660727	0	PA_SNI	PA_SNI
34	primary	new	251	PA_SNI	2923	0	11	0	5	2018-03-13	4	1	12506	100	observed	5,6	0	7,6	1,40360644680509	2,95	-1,3860060102172	2	7	0	6	5,67	1	2,33	5	5	5	85	5,25	Male	-0,494060876020788	T1	-6,57952858203415	-6,53789903489235	6,70638455827765	maart	3	2	Week	Tuesday	92	19,6020786933927	0	PA_SNI	PA_SNI
34	primary	new	251	PA_SNI	2921	0	11	0	6	2018-06-05	5	1	29997	214	observed	16,7	7,9	0	0,673401160382321	4,1	-0,236006010217203	4	7	7	6	6	6	6	6	6	6	100	6	Male	-0,494060876020788	T2	4,52047141796585	1,36210096510765	-0,893615441722346	juni	6	2	Week	Tuesday	76	3,60207869339273	1	PA_SNI	PA_SNI
34	primary	new	251	PA_SNI	2923	0	11	0	5	2018-03-10	1	1	14618	127	observed	11,4	1,8	6,6	1,40360644680509	2,95	-1,3860060102172	2	7	0	6	5,67	1	2,33	5	5	5	85	5,25	Male	-0,494060876020788	T1	-0,77952858203415	-4,73789903489235	5,70638455827765	maart	3	6	Weekend	Saturday	89	16,6020786933927	0	PA_SNI	PA_SNI
34	primary	new	251	PA_SNI	2923	0	11	0	5	2018-03-14	5	1	11088	66	observed	5,8	9,4	0	1,40360644680509	2,95	-1,3860060102172	2	7	0	6	5,67	1	2,33	5	5	5	85	5,25	Male	-0,494060876020788	T1	-6,37952858203415	2,86210096510765	-0,893615441722346	maart	3	3	Week	Wednesday	80	7,60207869339273	0	PA_SNI	PA_SNI
34	primary	new	251	PA_SNI	2923	0	11	0	5	2018-03-11	2	1	5687	38	observed	10,2	2,5	1	1,40360644680509	2,95	-1,3860060102172	2	7	0	6	5,67	1	2,33	5	5	5	85	5,25	Male	-0,494060876020788	T1	-1,97952858203415	-4,03789903489235	0,106384558277654	maart	3	0	Weekend	Sunday	91	18,6020786933927	0	PA_SNI	PA_SNI
34	primary	new	251	PA_SNI	2923	0	11	0	6	2018-06-04	4	1	15359	102	observed	18,2	4,9	0	1,40360644680509	2,95	-1,3860060102172	2	6	4	5	4	1	1	4	4	4	74	4,7	Male	-0,494060876020788	T2	6,02047141796585	-1,63789903489235	-0,893615441722346	juni	6	1	Week	Monday	82	9,60207869339273	0	PA_SNI	PA_SNI
34	primary	new	251	PA_SNI	2921	0	11	0	6	2018-06-03	3	1	10730	67	observed	19,3	4,6	0	0,673401160382321	4,1	-0,236006010217203	4	7	7	6	6	6	6	6	6	6	100	6	Male	-0,494060876020788	T2	7,12047141796585	-1,93789903489235	-0,893615441722346	juni	6	0	Weekend	Sunday	79	6,60207869339273	0	PA_SNI	PA_SNI
34	primary	new	251	PA_SNI	2921	0	11	0	6	2018-06-02	2	1	9944	34	observed	17	0,1	1,2	0,673401160382321	4,1	-0,236006010217203	4	7	7	6	6	6	6	6	6	6	100	6	Male	-0,494060876020788	T2	4,82047141796585	-6,43789903489235	0,306384558277654	juni	6	6	Weekend	Saturday	89	16,6020786933927	0	PA_SNI	PA_SNI
34	primary	new	251	PA_SNI	2921	0	11	0	6	2018-06-04	4	1	32166	224	observed	18,2	4,9	0	0,673401160382321	4,1	-0,236006010217203	4	7	7	6	6	6	6	6	6	6	100	6	Male	-0,494060876020788	T2	6,02047141796585	-1,63789903489235	-0,893615441722346	juni	6	1	Week	Monday	82	9,60207869339273	1	PA_SNI	PA_SNI
34	primary	new	251	PA_SNI	2922	0	11	0	6	2018-06-05	5	1	23506	181	observed	16,7	7,9	0	0,329275984036322	3	-1,3360060102172	7	7	1	3	3	3	3	4	3	3,5	62	4,1	Male	-0,494060876020788	T2	4,52047141796585	1,36210096510765	-0,893615441722346	juni	6	2	Week	Tuesday	76	3,60207869339273	0	PA_SNI	PA_SNI
34	primary	new	251	PA_SNI	2915	0	11	0	5	2018-03-10	1	1	9397	49	observed	11,4	1,8	6,6	-1,44808429866362	4,5	0,163993989782798	4	3	6	5,5	5,67	2,33	2,67	5	4	4,5	98	5,9	Male	-0,494060876020788	T1	-0,77952858203415	-4,73789903489235	5,70638455827765	maart	3	6	Weekend	Saturday	89	16,6020786933927	0	PA_SNI	PA_SNI
34	primary	new	251	PA_SNI	2915	0	11	0	5	2018-03-12	3	1	1392	0	observed	10,3	2,6	1,8	-1,44808429866362	4,5	0,163993989782798	4	3	6	5,5	5,67	2,33	2,67	5	4	4,5	98	5,9	Male	-0,494060876020788	T1	-1,87952858203415	-3,93789903489235	0,906384558277654	maart	3	1	Week	Monday	85	12,6020786933927	0	PA_SNI	PA_SNI
34	primary	new	251	PA_SNI	2927	0	11	0	5	2018-03-11	2	1	12899	100	observed	10,2	2,5	1	-0,777470482678948	4,1	-0,236006010217203	7	6	5	5,5	5,67	2,67	1,67	4	6	5	63	4,15	Male	-0,494060876020788	T1	-1,97952858203415	-4,03789903489235	0,106384558277654	maart	3	0	Weekend	Sunday	91	18,6020786933927	0	PA_SNI	PA_SNI
34	primary	new	251	PA_SNI	2923	0	11	0	7	2018-07-01	3	1	8067	19	imputed	21,3	15,3	0	1,40360644680509	2,95	-1,3860060102172	7	6	3	4	4	4	4	4	3	3,5	100	6	Male	-0,494060876020788	T3	9,12047141796585	8,76210096510765	-0,893615441722346	juli	7	0	Weekend	Sunday	36	-36,3979213066073	0	PA_SNI	PA_SNI
34	primary	new	251	PA_SNI	2923	0	11	0	5	2018-03-12	3	1	11458	82	observed	10,3	2,6	1,8	1,40360644680509	2,95	-1,3860060102172	2	7	0	6	5,67	1	2,33	5	5	5	85	5,25	Male	-0,494060876020788	T1	-1,87952858203415	-3,93789903489235	0,906384558277654	maart	3	1	Week	Monday	85	12,6020786933927	0	PA_SNI	PA_SNI
34	primary	new	251	PA_SNI	2924	0	10	0	5	2018-03-13	4	1	13840	109	observed	5,6	0	7,6	-0,380291741347582	4,9	0,563993989782798	3	4	5	5	5,33	2,67	2,33	3	4	3,5	59	3,95	Male	-1,49406087602079	T1	-6,57952858203415	-6,53789903489235	6,70638455827765	maart	3	2	Week	Tuesday	92	19,6020786933927	0	PA_SNI	PA_SNI
34	primary	new	251	PA_SNI	2924	0	10	0	5	2018-03-11	2	1	9814	60	observed	10,2	2,5	1	-0,380291741347582	4,9	0,563993989782798	3	4	5	5	5,33	2,67	2,33	3	4	3,5	59	3,95	Male	-1,49406087602079	T1	-1,97952858203415	-4,03789903489235	0,106384558277654	maart	3	0	Weekend	Sunday	91	18,6020786933927	0	PA_SNI	PA_SNI
34	primary	new	251	PA_SNI	2924	0	10	0	5	2018-03-12	3	1	20268	175	observed	10,3	2,6	1,8	-0,380291741347582	4,9	0,563993989782798	3	4	5	5	5,33	2,67	2,33	3	4	3,5	59	3,95	Male	-1,49406087602079	T1	-1,87952858203415	-3,93789903489235	0,906384558277654	maart	3	1	Week	Monday	85	12,6020786933927	0	PA_SNI	PA_SNI
34	primary	new	251	PA_SNI	2924	0	11	0	6	2018-06-03	3	1	22701	197	imputed	19,3	4,6	0	-0,380291741347582	4,9	0,563993989782798	5	5	6	5	5	5	5,33	5	6	5,5	89	5,45	Male	-0,494060876020788	T2	7,12047141796585	-1,93789903489235	-0,893615441722346	juni	6	0	Weekend	Sunday	79	6,60207869339273	0	PA_SNI	PA_SNI
34	primary	new	251	PA_SNI	2915	0	12	0	7	2018-06-29	1	1	12019	240	imputed	19,5	15,3	0	-1,44808429866362	4,5	0,163993989782798	3	4	4	3,5	4	4	4,33	3	4	3,5	55	3,75	Male	0,505939123979212	T3	7,32047141796585	8,76210096510765	-0,893615441722346	juni	6	5	Week	Friday	66	-6,39792130660727	0	PA_SNI	PA_SNI
34	primary	new	251	PA_SNI	2916	0	10	0	5	2018-03-12	3	1	8089	66	observed	10,3	2,6	1,8	-0,395217659039999	5,2	0,863993989782798	3	3	3	5	5,33	1,67	1	6	6	6	96	5,8	Male	-1,49406087602079	T1	-1,87952858203415	-3,93789903489235	0,906384558277654	maart	3	1	Week	Monday	85	12,6020786933927	0	PA_SNI	PA_SNI
34	primary	new	251	PA_SNI	2916	0	10	0	5	2018-03-13	4	1	9198	55	observed	5,6	0	7,6	-0,395217659039999	5,2	0,863993989782798	3	3	3	5	5,33	1,67	1	6	6	6	96	5,8	Male	-1,49406087602079	T1	-6,57952858203415	-6,53789903489235	6,70638455827765	maart	3	2	Week	Tuesday	92	19,6020786933927	0	PA_SNI	PA_SNI
34	primary	new	251	PA_SNI	2925	0	11	0	7	2018-07-02	4	1	12382	68	observed	20,6	15,3	0	-2,79360393253533	4,15	-0,186006010217202	5	3	5	3	3,67	1,33	1,33	3	2	2,5	88	5,4	Male	-0,494060876020788	T3	8,42047141796585	8,76210096510765	-0,893615441722346	juli	7	1	Week	Monday	40	-32,3979213066073	0	PA_SNI	PA_SNI
34	primary	new	251	PA_SNI	2925	0	11	0	7	2018-07-03	5	1	14778	104	observed	19,6	15,3	0	-2,79360393253533	4,15	-0,186006010217202	5	3	5	3	3,67	1,33	1,33	3	2	2,5	88	5,4	Male	-0,494060876020788	T3	7,42047141796585	8,76210096510765	-0,893615441722346	juli	7	2	Week	Tuesday	60	-12,3979213066073	0	PA_SNI	PA_SNI
34	primary	new	251	PA_SNI	2921	0	11	0	7	2018-07-02	4	1	10136	54	observed	20,6	15,3	0	0,673401160382321	4,1	-0,236006010217203	3	3	0	6	4,33	2,67	1	6	6	6	100	6	Male	-0,494060876020788	T3	8,42047141796585	8,76210096510765	-0,893615441722346	juli	7	1	Week	Monday	40	-32,3979213066073	0	PA_SNI	PA_SNI
34	primary	new	251	PA_SNI	2915	0	11	0	5	2018-03-11	2	1	7866	20	observed	10,2	2,5	1	-1,44808429866362	4,5	0,163993989782798	4	3	6	5,5	5,67	2,33	2,67	5	4	4,5	98	5,9	Male	-0,494060876020788	T1	-1,97952858203415	-4,03789903489235	0,106384558277654	maart	3	0	Weekend	Sunday	91	18,6020786933927	0	PA_SNI	PA_SNI
34	primary	new	251	PA_SNI	2915	0	12	0	6	2018-06-01	1	1	9011	195	imputed	17,6	1,2	1,5	-1,44808429866362	4,5	0,163993989782798	4	5	2	4	5,33	4,67	5	5	5	5	77	4,85	Male	0,505939123979212	T2	5,42047141796585	-5,33789903489235	0,606384558277654	juni	6	5	Week	Friday	90	17,6020786933927	0	PA_SNI	PA_SNI
34	primary	new	251	PA_SNI	2924	0	10	0	5	2018-03-10	1	1	2865	18	observed	11,4	1,8	6,6	-0,380291741347582	4,9	0,563993989782798	3	4	5	5	5,33	2,67	2,33	3	4	3,5	59	3,95	Male	-1,49406087602079	T1	-0,77952858203415	-4,73789903489235	5,70638455827765	maart	3	6	Weekend	Saturday	89	16,6020786933927	0	PA_SNI	PA_SNI
34	primary	new	251	PA_SNI	2922	0	11	0	5	2018-03-13	4	1	17228	109	observed	5,6	0	7,6	0,329275984036322	3	-1,3360060102172	2	2	3	3,5	2,33	1,33	1,33	5	4	4,5	76	4,8	Male	-0,494060876020788	T1	-6,57952858203415	-6,53789903489235	6,70638455827765	maart	3	2	Week	Tuesday	92	19,6020786933927	0	PA_SNI	PA_SNI
34	primary	new	251	PA_SNI	2922	0	11	0	5	2018-03-10	1	1	17639	139	observed	11,4	1,8	6,6	0,329275984036322	3	-1,3360060102172	2	2	3	3,5	2,33	1,33	1,33	5	4	4,5	76	4,8	Male	-0,494060876020788	T1	-0,77952858203415	-4,73789903489235	5,70638455827765	maart	3	6	Weekend	Saturday	89	16,6020786933927	0	PA_SNI	PA_SNI
34	primary	new	251	PA_SNI	2922	0	11	0	5	2018-03-14	5	1	2736	13	observed	5,8	9,4	0	0,329275984036322	3	-1,3360060102172	2	2	3	3,5	2,33	1,33	1,33	5	4	4,5	76	4,8	Male	-0,494060876020788	T1	-6,37952858203415	2,86210096510765	-0,893615441722346	maart	3	3	Week	Wednesday	80	7,60207869339273	0	PA_SNI	PA_SNI
34	primary	new	251	PA_SNI	2922	0	11	0	5	2018-03-11	2	1	8745	35	observed	10,2	2,5	1	0,329275984036322	3	-1,3360060102172	2	2	3	3,5	2,33	1,33	1,33	5	4	4,5	76	4,8	Male	-0,494060876020788	T1	-1,97952858203415	-4,03789903489235	0,106384558277654	maart	3	0	Weekend	Sunday	91	18,6020786933927	0	PA_SNI	PA_SNI
34	primary	new	251	PA_SNI	2918	1	11	0	5	2018-03-11	2	1	5957	0	observed	10,2	2,5	1	2,94	3,3	-1,0360060102172	5	5	6	4,5	4,67	5	5	5	6	5,5	61	4,05	Female	-0,494060876020788	T1	-1,97952858203415	-4,03789903489235	0,106384558277654	maart	3	0	Weekend	Sunday	91	18,6020786933927	0	PA_SNI	PA_SNI
34	primary	new	251	PA_SNI	2924	0	11	0	6	2018-06-01	1	1	5025	172	imputed	17,6	1,2	1,5	-0,380291741347582	4,9	0,563993989782798	5	5	6	5	5	5	5,33	5	6	5,5	89	5,45	Male	-0,494060876020788	T2	5,42047141796585	-5,33789903489235	0,606384558277654	juni	6	5	Week	Friday	90	17,6020786933927	0	PA_SNI	PA_SNI
34	primary	new	251	PA_SNI	2924	0	11	0	6	2018-06-02	2	1	8810	130	imputed	17	0,1	1,2	-0,380291741347582	4,9	0,563993989782798	5	5	6	5	5	5	5,33	5	6	5,5	89	5,45	Male	-0,494060876020788	T2	4,82047141796585	-6,43789903489235	0,306384558277654	juni	6	6	Weekend	Saturday	89	16,6020786933927	0	PA_SNI	PA_SNI
34	primary	new	251	PA_SNI	2924	0	11	0	7	2018-07-01	3	1	29483	116	imputed	21,3	15,3	0	-0,380291741347582	4,9	0,563993989782798	NA	NA	NA	NA	NA	NA	NA	NA	NA	NA	77	4,85	Male	-0,494060876020788	T3	9,12047141796585	8,76210096510765	-0,893615441722346	juli	7	0	Weekend	Sunday	36	-36,3979213066073	1	PA_SNI	PA_SNI
34	primary	new	251	PA_SNI	2921	0	11	0	7	2018-06-29	1	1	44560	397	observed	19,5	15,3	0	0,673401160382321	4,1	-0,236006010217203	3	3	0	6	4,33	2,67	1	6	6	6	100	6	Male	-0,494060876020788	T3	7,32047141796585	8,76210096510765	-0,893615441722346	juni	6	5	Week	Friday	66	-6,39792130660727	1	PA_SNI	PA_SNI
34	primary	new	251	PA_SNI	2924	0	11	0	7	2018-06-29	1	1	3233	70	imputed	19,5	15,3	0	-0,380291741347582	4,9	0,563993989782798	NA	NA	NA	NA	NA	NA	NA	NA	NA	NA	77	4,85	Male	-0,494060876020788	T3	7,32047141796585	8,76210096510765	-0,893615441722346	juni	6	5	Week	Friday	66	-6,39792130660727	0	PA_SNI	PA_SNI
34	primary	new	251	PA_SNI	2921	0	11	0	7	2018-06-30	2	1	32707	216	observed	21,3	15,3	0	0,673401160382321	4,1	-0,236006010217203	3	3	0	6	4,33	2,67	1	6	6	6	100	6	Male	-0,494060876020788	T3	9,12047141796585	8,76210096510765	-0,893615441722346	juni	6	6	Weekend	Saturday	51	-21,3979213066073	1	PA_SNI	PA_SNI
34	primary	new	251	PA_SNI	2921	0	11	0	7	2018-07-01	3	1	11719	73	observed	21,3	15,3	0	0,673401160382321	4,1	-0,236006010217203	3	3	0	6	4,33	2,67	1	6	6	6	100	6	Male	-0,494060876020788	T3	9,12047141796585	8,76210096510765	-0,893615441722346	juli	7	0	Weekend	Sunday	36	-36,3979213066073	0	PA_SNI	PA_SNI
34	primary	new	251	PA_SNI	2917	1	10	0	7	2018-07-01	3	1	12966	0	imputed	21,3	15,3	0	1,06810300991198	3,75966898918759	-0,576337021029614	NA	NA	NA	NA	NA	NA	NA	NA	NA	NA	NA	NA	Female	-1,49406087602079	T3	9,12047141796585	8,76210096510765	-0,893615441722346	juli	7	0	Weekend	Sunday	36	-36,3979213066073	0	PA_SNI	PA_SNI
34	primary	new	251	PA_SNI	2918	1	11	0	5	2018-03-12	3	1	8136	8	observed	10,3	2,6	1,8	2,94	3,3	-1,0360060102172	5	5	6	4,5	4,67	5	5	5	6	5,5	61	4,05	Female	-0,494060876020788	T1	-1,87952858203415	-3,93789903489235	0,906384558277654	maart	3	1	Week	Monday	85	12,6020786933927	0	PA_SNI	PA_SNI
34	primary	new	251	PA_SNI	2918	1	11	0	5	2018-03-10	1	1	14501	57	observed	11,4	1,8	6,6	2,94	3,3	-1,0360060102172	5	5	6	4,5	4,67	5	5	5	6	5,5	61	4,05	Female	-0,494060876020788	T1	-0,77952858203415	-4,73789903489235	5,70638455827765	maart	3	6	Weekend	Saturday	89	16,6020786933927	0	PA_SNI	PA_SNI
34	primary	new	251	PA_SNI	2918	1	11	0	5	2018-03-14	5	1	10753	7	observed	5,8	9,4	0	2,94	3,3	-1,0360060102172	5	5	6	4,5	4,67	5	5	5	6	5,5	61	4,05	Female	-0,494060876020788	T1	-6,37952858203415	2,86210096510765	-0,893615441722346	maart	3	3	Week	Wednesday	80	7,60207869339273	0	PA_SNI	PA_SNI
34	primary	new	251	PA_SNI	2918	1	11	0	5	2018-03-13	4	1	10078	27	observed	5,6	0	7,6	2,94	3,3	-1,0360060102172	5	5	6	4,5	4,67	5	5	5	6	5,5	61	4,05	Female	-0,494060876020788	T1	-6,57952858203415	-6,53789903489235	6,70638455827765	maart	3	2	Week	Tuesday	92	19,6020786933927	0	PA_SNI	PA_SNI
34	primary	new	251	PA_SNI	2915	0	12	0	7	2018-06-30	2	1	1000	157	imputed	21,3	15,3	0	-1,44808429866362	4,5	0,163993989782798	3	4	4	3,5	4	4	4,33	3	4	3,5	55	3,75	Male	0,505939123979212	T3	9,12047141796585	8,76210096510765	-0,893615441722346	juni	6	6	Weekend	Saturday	51	-21,3979213066073	0	PA_SNI	PA_SNI
34	primary	new	251	PA_SNI	2925	0	10	0	6	2018-06-03	3	1	15217	102	observed	19,3	4,6	0	-2,79360393253533	4,15	-0,186006010217202	1	5	4	4	5	2,67	1	4	4	4	95	5,75	Male	-1,49406087602079	T2	7,12047141796585	-1,93789903489235	-0,893615441722346	juni	6	0	Weekend	Sunday	79	6,60207869339273	0	PA_SNI	PA_SNI
34	primary	new	251	PA_SNI	2925	0	10	0	6	2018-06-04	4	1	6382	20	observed	18,2	4,9	0	-2,79360393253533	4,15	-0,186006010217202	1	5	4	4	5	2,67	1	4	4	4	95	5,75	Male	-1,49406087602079	T2	6,02047141796585	-1,63789903489235	-0,893615441722346	juni	6	1	Week	Monday	82	9,60207869339273	0	PA_SNI	PA_SNI
34	primary	new	251	PA_SNI	2925	0	11	0	7	2018-06-29	1	1	19851	188	observed	19,5	15,3	0	-2,79360393253533	4,15	-0,186006010217202	5	3	5	3	3,67	1,33	1,33	3	2	2,5	88	5,4	Male	-0,494060876020788	T3	7,32047141796585	8,76210096510765	-0,893615441722346	juni	6	5	Week	Friday	66	-6,39792130660727	0	PA_SNI	PA_SNI
34	primary	new	251	PA_SNI	2925	0	11	0	7	2018-07-01	3	1	9367	37	observed	21,3	15,3	0	-2,79360393253533	4,15	-0,186006010217202	5	3	5	3	3,67	1,33	1,33	3	2	2,5	88	5,4	Male	-0,494060876020788	T3	9,12047141796585	8,76210096510765	-0,893615441722346	juli	7	0	Weekend	Sunday	36	-36,3979213066073	0	PA_SNI	PA_SNI
34	primary	new	251	PA_SNI	2927	0	11	0	7	2018-06-30	2	1	5869	0	observed	21,3	15,3	0	-0,777470482678948	4,1	-0,236006010217203	NA	NA	NA	NA	NA	NA	NA	NA	NA	NA	NA	NA	Male	-0,494060876020788	T3	9,12047141796585	8,76210096510765	-0,893615441722346	juni	6	6	Weekend	Saturday	51	-21,3979213066073	0	PA_SNI	PA_SNI
34	primary	new	251	PA_SNI	2924	0	11	0	7	2018-06-30	2	1	11966	93	imputed	21,3	15,3	0	-0,380291741347582	4,9	0,563993989782798	NA	NA	NA	NA	NA	NA	NA	NA	NA	NA	77	4,85	Male	-0,494060876020788	T3	9,12047141796585	8,76210096510765	-0,893615441722346	juni	6	6	Weekend	Saturday	51	-21,3979213066073	0	PA_SNI	PA_SNI
34	primary	new	251	PA_SNI	2925	0	10	0	5	2018-03-10	1	1	6264	47	observed	11,4	1,8	6,6	-2,79360393253533	4,15	-0,186006010217202	5	5	5	3,5	5	1,33	1,33	4	4	4	94	5,7	Male	-1,49406087602079	T1	-0,77952858203415	-4,73789903489235	5,70638455827765	maart	3	6	Weekend	Saturday	89	16,6020786933927	0	PA_SNI	PA_SNI
34	primary	new	251	PA_SNI	2921	0	11	0	7	2018-07-03	5	1	17297	99	observed	19,6	15,3	0	0,673401160382321	4,1	-0,236006010217203	3	3	0	6	4,33	2,67	1	6	6	6	100	6	Male	-0,494060876020788	T3	7,42047141796585	8,76210096510765	-0,893615441722346	juli	7	2	Week	Tuesday	60	-12,3979213066073	0	PA_SNI	PA_SNI
34	primary	new	251	PA_SNI	2922	0	11	0	5	2018-03-12	3	1	14191	82	observed	10,3	2,6	1,8	0,329275984036322	3	-1,3360060102172	2	2	3	3,5	2,33	1,33	1,33	5	4	4,5	76	4,8	Male	-0,494060876020788	T1	-1,87952858203415	-3,93789903489235	0,906384558277654	maart	3	1	Week	Monday	85	12,6020786933927	0	PA_SNI	PA_SNI
34	primary	new	251	PA_SNI	2915	0	12	0	6	2018-06-03	3	1	9877	118	imputed	19,3	4,6	0	-1,44808429866362	4,5	0,163993989782798	4	5	2	4	5,33	4,67	5	5	5	5	77	4,85	Male	0,505939123979212	T2	7,12047141796585	-1,93789903489235	-0,893615441722346	juni	6	0	Weekend	Sunday	79	6,60207869339273	0	PA_SNI	PA_SNI
34	primary	new	251	PA_SNI	2915	0	12	0	6	2018-06-02	2	1	5948	160	imputed	17	0,1	1,2	-1,44808429866362	4,5	0,163993989782798	4	5	2	4	5,33	4,67	5	5	5	5	77	4,85	Male	0,505939123979212	T2	4,82047141796585	-6,43789903489235	0,306384558277654	juni	6	6	Weekend	Saturday	89	16,6020786933927	0	PA_SNI	PA_SNI
34	primary	new	251	PA_SNI	2915	0	12	0	7	2018-07-01	3	1	8691	135	imputed	21,3	15,3	0	-1,44808429866362	4,5	0,163993989782798	3	4	4	3,5	4	4	4,33	3	4	3,5	55	3,75	Male	0,505939123979212	T3	9,12047141796585	8,76210096510765	-0,893615441722346	juli	7	0	Weekend	Sunday	36	-36,3979213066073	0	PA_SNI	PA_SNI
34	primary	new	251	PA_SNI	2927	0	11	0	6	2018-06-01	1	1	12464	52	observed	17,6	1,2	1,5	-0,777470482678948	4,1	-0,236006010217203	4	4	4	5,5	6	1,33	2	5	5	5	84	5,2	Male	-0,494060876020788	T2	5,42047141796585	-5,33789903489235	0,606384558277654	juni	6	5	Week	Friday	90	17,6020786933927	0	PA_SNI	PA_SNI
34	primary	new	251	PA_SNI	2927	0	11	0	6	2018-06-02	2	1	34877	327	observed	17	0,1	1,2	-0,777470482678948	4,1	-0,236006010217203	4	4	4	5,5	6	1,33	2	5	5	5	84	5,2	Male	-0,494060876020788	T2	4,82047141796585	-6,43789903489235	0,306384558277654	juni	6	6	Weekend	Saturday	89	16,6020786933927	1	PA_SNI	PA_SNI
34	primary	new	251	PA_SNI	2918	1	11	0	6	2018-06-04	4	1	12395	30	observed	18,2	4,9	0	2,94	3,3	-1,0360060102172	5	7	6	6	5,67	4,33	2	6	6	6	81	5,05	Female	-0,494060876020788	T2	6,02047141796585	-1,63789903489235	-0,893615441722346	juni	6	1	Week	Monday	82	9,60207869339273	0	PA_SNI	PA_SNI
34	primary	new	251	PA_SNI	2918	1	11	0	6	2018-06-02	2	1	21761	127	observed	17	0,1	1,2	2,94	3,3	-1,0360060102172	5	7	6	6	5,67	4,33	2	6	6	6	81	5,05	Female	-0,494060876020788	T2	4,82047141796585	-6,43789903489235	0,306384558277654	juni	6	6	Weekend	Saturday	89	16,6020786933927	0	PA_SNI	PA_SNI
34	primary	new	251	PA_SNI	2918	1	11	0	6	2018-06-03	3	1	10646	21	observed	19,3	4,6	0	2,94	3,3	-1,0360060102172	5	7	6	6	5,67	4,33	2	6	6	6	81	5,05	Female	-0,494060876020788	T2	7,12047141796585	-1,93789903489235	-0,893615441722346	juni	6	0	Weekend	Sunday	79	6,60207869339273	0	PA_SNI	PA_SNI
34	primary	new	251	PA_SNI	2925	0	10	0	5	2018-03-11	2	1	7612	47	observed	10,2	2,5	1	-2,79360393253533	4,15	-0,186006010217202	5	5	5	3,5	5	1,33	1,33	4	4	4	94	5,7	Male	-1,49406087602079	T1	-1,97952858203415	-4,03789903489235	0,106384558277654	maart	3	0	Weekend	Sunday	91	18,6020786933927	0	PA_SNI	PA_SNI
34	primary	new	251	PA_SNI	2927	0	11	0	7	2018-06-29	1	1	6200	19	observed	19,5	15,3	0	-0,777470482678948	4,1	-0,236006010217203	NA	NA	NA	NA	NA	NA	NA	NA	NA	NA	NA	NA	Male	-0,494060876020788	T3	7,32047141796585	8,76210096510765	-0,893615441722346	juni	6	5	Week	Friday	66	-6,39792130660727	0	PA_SNI	PA_SNI
34	primary	new	251	PA_SNI	2918	1	11	0	6	2018-06-01	1	1	12396	22	observed	17,6	1,2	1,5	2,94	3,3	-1,0360060102172	5	7	6	6	5,67	4,33	2	6	6	6	81	5,05	Female	-0,494060876020788	T2	5,42047141796585	-5,33789903489235	0,606384558277654	juni	6	5	Week	Friday	90	17,6020786933927	0	PA_SNI	PA_SNI
34	primary	new	251	PA_SNI	2925	0	10	0	5	2018-03-12	3	1	6318	44	observed	10,3	2,6	1,8	-2,79360393253533	4,15	-0,186006010217202	5	5	5	3,5	5	1,33	1,33	4	4	4	94	5,7	Male	-1,49406087602079	T1	-1,87952858203415	-3,93789903489235	0,906384558277654	maart	3	1	Week	Monday	85	12,6020786933927	0	PA_SNI	PA_SNI
34	primary	new	251	PA_SNI	2925	0	10	0	6	2018-06-02	2	1	33810	299	observed	17	0,1	1,2	-2,79360393253533	4,15	-0,186006010217202	1	5	4	4	5	2,67	1	4	4	4	95	5,75	Male	-1,49406087602079	T2	4,82047141796585	-6,43789903489235	0,306384558277654	juni	6	6	Weekend	Saturday	89	16,6020786933927	1	PA_SNI	PA_SNI
34	primary	new	251	PA_SNI	2925	0	10	0	5	2018-03-13	4	1	6502	38	observed	5,6	0	7,6	-2,79360393253533	4,15	-0,186006010217202	5	5	5	3,5	5	1,33	1,33	4	4	4	94	5,7	Male	-1,49406087602079	T1	-6,57952858203415	-6,53789903489235	6,70638455827765	maart	3	2	Week	Tuesday	92	19,6020786933927	0	PA_SNI	PA_SNI
34	primary	new	251	PA_SNI	2927	0	11	0	6	2018-06-03	3	1	3050	18	observed	19,3	4,6	0	-0,777470482678948	4,1	-0,236006010217203	4	4	4	5,5	6	1,33	2	5	5	5	84	5,2	Male	-0,494060876020788	T2	7,12047141796585	-1,93789903489235	-0,893615441722346	juni	6	0	Weekend	Sunday	79	6,60207869339273	0	PA_SNI	PA_SNI
34	primary	new	251	PA_SNI	2927	0	11	0	6	2018-06-05	5	1	15423	107	observed	16,7	7,9	0	-0,777470482678948	4,1	-0,236006010217203	4	4	4	5,5	6	1,33	2	5	5	5	84	5,2	Male	-0,494060876020788	T2	4,52047141796585	1,36210096510765	-0,893615441722346	juni	6	2	Week	Tuesday	76	3,60207869339273	0	PA_SNI	PA_SNI
34	primary	new	251	PA_SNI	2927	0	11	0	7	2018-07-01	3	1	2351	22	imputed	21,3	15,3	0	-0,777470482678948	4,1	-0,236006010217203	NA	NA	NA	NA	NA	NA	NA	NA	NA	NA	NA	NA	Male	-0,494060876020788	T3	9,12047141796585	8,76210096510765	-0,893615441722346	juli	7	0	Weekend	Sunday	36	-36,3979213066073	0	PA_SNI	PA_SNI
34	primary	new	251	PA_SNI	2925	0	10	0	6	2018-06-01	1	1	9576	42	observed	17,6	1,2	1,5	-2,79360393253533	4,15	-0,186006010217202	1	5	4	4	5	2,67	1	4	4	4	95	5,75	Male	-1,49406087602079	T2	5,42047141796585	-5,33789903489235	0,606384558277654	juni	6	5	Week	Friday	90	17,6020786933927	0	PA_SNI	PA_SNI
34	primary	new	251	PA_SNI	2918	1	11	0	7	2018-06-29	1	1	5509	51	imputed	19,5	15,3	0	2,94	3,3	-1,0360060102172	NA	NA	NA	NA	NA	NA	NA	NA	NA	NA	47	3,35	Female	-0,494060876020788	T3	7,32047141796585	8,76210096510765	-0,893615441722346	juni	6	5	Week	Friday	66	-6,39792130660727	0	PA_SNI	PA_SNI
34	primary	new	251	PA_SNI	2927	0	11	0	6	2018-06-04	4	1	8813	79	observed	18,2	4,9	0	-0,777470482678948	4,1	-0,236006010217203	4	4	4	5,5	6	1,33	2	5	5	5	84	5,2	Male	-0,494060876020788	T2	6,02047141796585	-1,63789903489235	-0,893615441722346	juni	6	1	Week	Monday	82	9,60207869339273	0	PA_SNI	PA_SNI
34	primary	new	251	PA_SNI	2918	1	11	0	6	2018-06-05	5	1	7383	0	observed	16,7	7,9	0	2,94	3,3	-1,0360060102172	5	7	6	6	5,67	4,33	2	6	6	6	81	5,05	Female	-0,494060876020788	T2	4,52047141796585	1,36210096510765	-0,893615441722346	juni	6	2	Week	Tuesday	76	3,60207869339273	0	PA_SNI	PA_SNI
34	primary	new	251	PA_SNI	2918	1	11	0	7	2018-07-03	5	1	1908	0	observed	19,6	15,3	0	2,94	3,3	-1,0360060102172	NA	NA	NA	NA	NA	NA	NA	NA	NA	NA	47	3,35	Female	-0,494060876020788	T3	7,42047141796585	8,76210096510765	-0,893615441722346	juli	7	2	Week	Tuesday	60	-12,3979213066073	0	PA_SNI	PA_SNI
34	primary	new	251	PA_SNI	2918	1	11	0	7	2018-07-01	3	1	4047	94	imputed	21,3	15,3	0	2,94	3,3	-1,0360060102172	NA	NA	NA	NA	NA	NA	NA	NA	NA	NA	47	3,35	Female	-0,494060876020788	T3	9,12047141796585	8,76210096510765	-0,893615441722346	juli	7	0	Weekend	Sunday	36	-36,3979213066073	0	PA_SNI	PA_SNI
34	primary	new	251	PA_SNI	2919	1	11	0	5	2018-03-13	4	1	5797	0	observed	5,6	0	7,6	0,28847591575575	4,4	0,0639939897827979	7	3	7	4	3,33	1	1	5	4	4,5	67	4,35	Female	-0,494060876020788	T1	-6,57952858203415	-6,53789903489235	6,70638455827765	maart	3	2	Week	Tuesday	92	19,6020786933927	0	PA_SNI	PA_SNI
34	primary	new	251	PA_SNI	2925	0	10	0	5	2018-03-14	5	1	4217	38	observed	5,8	9,4	0	-2,79360393253533	4,15	-0,186006010217202	5	5	5	3,5	5	1,33	1,33	4	4	4	94	5,7	Male	-1,49406087602079	T1	-6,37952858203415	2,86210096510765	-0,893615441722346	maart	3	3	Week	Wednesday	80	7,60207869339273	0	PA_SNI	PA_SNI
34	primary	new	251	PA_SNI	2918	1	11	0	7	2018-07-02	4	1	6179	9	observed	20,6	15,3	0	2,94	3,3	-1,0360060102172	NA	NA	NA	NA	NA	NA	NA	NA	NA	NA	47	3,35	Female	-0,494060876020788	T3	8,42047141796585	8,76210096510765	-0,893615441722346	juli	7	1	Week	Monday	40	-32,3979213066073	0	PA_SNI	PA_SNI
34	primary	new	251	PA_SNI	2918	1	11	0	7	2018-06-30	2	1	6432	7	imputed	21,3	15,3	0	2,94	3,3	-1,0360060102172	NA	NA	NA	NA	NA	NA	NA	NA	NA	NA	47	3,35	Female	-0,494060876020788	T3	9,12047141796585	8,76210096510765	-0,893615441722346	juni	6	6	Weekend	Saturday	51	-21,3979213066073	0	PA_SNI	PA_SNI
39	primary	old	125	PA_MASS	902	0	13	0	5	2018-02-28	1	1	8484	74	observed	-6,6	7,3	0	1,98438244608787	2,992423178834	-1,3435828313832	3	3	3	5	5	5	5	4	4	4	51	3,55	Male	1,50593912397921	T1	-18,7795285820341	0,762100965107646	-0,893615441722346	februari	2	3	Week	Wednesday	69	-3,39792130660727	0	PA_MASS	PA_MASS
39	primary	old	125	PA_MASS	901	0	12	0	7	2018-06-16	3	1	1000	13	imputed	17,5	3,2	0	0,974826706318002	4,8	0,463993989782797	NA	NA	NA	NA	NA	NA	NA	NA	NA	NA	NA	NA	Male	0,505939123979212	T3	5,32047141796585	-3,33789903489235	-0,893615441722346	juni	6	6	Weekend	Saturday	65	-7,39792130660727	0	PA_MASS	PA_MASS
39	primary	old	125	PA_MASS	887	1	11	0	5	2018-03-01	2	1	17477	87	observed	-4,7	5,4	0	1,20613093199713	3,95	-0,386006010217203	2	3	0	4,5	4,67	1	1	5	3	4	63	4,15	Female	-0,494060876020788	T1	-16,8795285820342	-1,13789903489235	-0,893615441722346	maart	3	4	Week	Thursday	50	-22,3979213066073	0	PA_MASS	PA_MASS
39	primary	old	125	PA_MASS	902	0	13	0	5	2018-03-02	3	1	6459	33	imputed	-3,7	6,8	0	1,98438244608787	2,992423178834	-1,3435828313832	3	3	3	5	5	5	5	4	4	4	51	3,55	Male	1,50593912397921	T1	-15,8795285820342	0,262100965107646	-0,893615441722346	maart	3	5	Week	Friday	52	-20,3979213066073	0	PA_MASS	PA_MASS
39	primary	old	125	PA_MASS	902	0	13	0	6	2018-05-20	3	1	2894	49	imputed	15,4	12,7	0	1,98438244608787	2,992423178834	-1,3435828313832	NA	NA	NA	NA	NA	NA	NA	NA	NA	NA	0	1	Male	1,50593912397921	T2	3,22047141796585	6,16210096510765	-0,893615441722346	mei	5	0	Weekend	Sunday	70	-2,39792130660727	0	PA_MASS	PA_MASS
39	primary	old	125	PA_MASS	904	1	12	0	6	2018-05-18	1	1	11232	31	observed	10,9	4,8	0	-0,680566403301576	6	1,6639939897828	NA	NA	NA	NA	NA	NA	NA	NA	NA	NA	NA	NA	Female	0,505939123979212	T2	-1,27952858203415	-1,73789903489235	-0,893615441722346	mei	5	5	Week	Friday	69	-3,39792130660727	0	PA_MASS	PA_MASS
39	primary	old	125	PA_MASS	902	0	13	0	5	2018-03-01	2	1	1000	8	imputed	-4,7	5,4	0	1,98438244608787	2,992423178834	-1,3435828313832	3	3	3	5	5	5	5	4	4	4	51	3,55	Male	1,50593912397921	T1	-16,8795285820342	-1,13789903489235	-0,893615441722346	maart	3	4	Week	Thursday	50	-22,3979213066073	0	PA_MASS	PA_MASS
39	primary	old	125	PA_MASS	900	1	11	0	7	2018-06-15	2	1	30157	206	observed	18,8	8,3	0	0,766016222388216	3,7	-0,636006010217202	3	3	3	6	6	2,33	1	6	5	5,5	100	6	Female	-0,494060876020788	T3	6,62047141796585	1,76210096510765	-0,893615441722346	juni	6	5	Week	Friday	72	-0,397921306607273	1	PA_MASS	PA_MASS
39	primary	old	125	PA_MASS	901	0	12	0	7	2018-06-14	1	1	18257	127	imputed	15,7	3,2	1,2	0,974826706318002	4,8	0,463993989782797	NA	NA	NA	NA	NA	NA	NA	NA	NA	NA	NA	NA	Male	0,505939123979212	T3	3,52047141796585	-3,33789903489235	0,306384558277654	juni	6	4	Week	Thursday	80	7,60207869339273	0	PA_MASS	PA_MASS
39	primary	old	125	PA_MASS	904	1	12	0	6	2018-05-20	3	1	7538	17	observed	15,4	12,7	0	-0,680566403301576	6	1,6639939897828	NA	NA	NA	NA	NA	NA	NA	NA	NA	NA	NA	NA	Female	0,505939123979212	T2	3,22047141796585	6,16210096510765	-0,893615441722346	mei	5	0	Weekend	Sunday	70	-2,39792130660727	0	PA_MASS	PA_MASS
39	primary	old	125	PA_MASS	905	1	12	0	6	2018-05-21	4	1	12954	93	observed	19,2	11,5	0	-0,918037769209912	5,21272618358619	0,876720173368989	NA	NA	NA	NA	NA	NA	NA	NA	NA	NA	56	3,8	Female	0,505939123979212	T2	7,02047141796585	4,96210096510765	-0,893615441722346	mei	5	1	Week	Monday	50	-22,3979213066073	0	PA_MASS	PA_MASS
39	primary	old	125	PA_MASS	904	1	12	0	6	2018-05-19	2	1	13075	39	observed	11	0,1	0	-0,680566403301576	6	1,6639939897828	NA	NA	NA	NA	NA	NA	NA	NA	NA	NA	NA	NA	Female	0,505939123979212	T2	-1,17952858203415	-6,43789903489235	-0,893615441722346	mei	5	6	Weekend	Saturday	83	10,6020786933927	0	PA_MASS	PA_MASS
39	primary	old	125	PA_MASS	887	1	11	0	5	2018-03-03	4	1	12784	50	observed	-1,7	1,8	0	1,20613093199713	3,95	-0,386006010217203	2	3	0	4,5	4,67	1	1	5	3	4	63	4,15	Female	-0,494060876020788	T1	-13,8795285820341	-4,73789903489235	-0,893615441722346	maart	3	6	Weekend	Saturday	64	-8,39792130660727	0	PA_MASS	PA_MASS
39	primary	old	125	PA_MASS	887	1	12	0	6	2018-05-20	3	1	9067	38	observed	15,4	12,7	0	1,20613093199713	3,95	-0,386006010217203	5	5	1	5,5	4	2,67	1,33	5	4	4,5	70	4,5	Female	0,505939123979212	T2	3,22047141796585	6,16210096510765	-0,893615441722346	mei	5	0	Weekend	Sunday	70	-2,39792130660727	0	PA_MASS	PA_MASS
39	primary	old	125	PA_MASS	901	0	12	0	5	2018-02-28	1	1	10597	69	observed	-6,6	7,3	0	0,974826706318002	4,8	0,463993989782797	3	3	4	6	6	1	1	6	6	6	100	6	Male	0,505939123979212	T1	-18,7795285820341	0,762100965107646	-0,893615441722346	februari	2	3	Week	Wednesday	69	-3,39792130660727	0	PA_MASS	PA_MASS
39	primary	old	125	PA_MASS	904	1	12	0	6	2018-05-21	4	1	7309	0	observed	19,2	11,5	0	-0,680566403301576	6	1,6639939897828	NA	NA	NA	NA	NA	NA	NA	NA	NA	NA	NA	NA	Female	0,505939123979212	T2	7,02047141796585	4,96210096510765	-0,893615441722346	mei	5	1	Week	Monday	50	-22,3979213066073	0	PA_MASS	PA_MASS
39	primary	old	125	PA_MASS	901	0	12	0	5	2018-03-01	2	1	10980	81	observed	-4,7	5,4	0	0,974826706318002	4,8	0,463993989782797	3	3	4	6	6	1	1	6	6	6	100	6	Male	0,505939123979212	T1	-16,8795285820342	-1,13789903489235	-0,893615441722346	maart	3	4	Week	Thursday	50	-22,3979213066073	0	PA_MASS	PA_MASS
39	primary	old	125	PA_MASS	901	0	12	0	6	2018-05-22	5	1	7236	11	observed	18,3	3,5	0,6	0,974826706318002	4,8	0,463993989782797	NA	NA	NA	NA	NA	NA	NA	NA	NA	NA	85	5,25	Male	0,505939123979212	T2	6,12047141796585	-3,03789903489235	-0,293615441722346	mei	5	2	Week	Tuesday	68	-4,39792130660727	0	PA_MASS	PA_MASS
39	primary	old	125	PA_MASS	901	0	12	0	6	2018-05-19	2	1	9978	78	observed	11	0,1	0	0,974826706318002	4,8	0,463993989782797	NA	NA	NA	NA	NA	NA	NA	NA	NA	NA	85	5,25	Male	0,505939123979212	T2	-1,17952858203415	-6,43789903489235	-0,893615441722346	mei	5	6	Weekend	Saturday	83	10,6020786933927	0	PA_MASS	PA_MASS
39	primary	old	125	PA_MASS	902	0	13	0	6	2018-05-18	1	1	15144	0	imputed	10,9	4,8	0	1,98438244608787	2,992423178834	-1,3435828313832	NA	NA	NA	NA	NA	NA	NA	NA	NA	NA	0	1	Male	1,50593912397921	T2	-1,27952858203415	-1,73789903489235	-0,893615441722346	mei	5	5	Week	Friday	69	-3,39792130660727	0	PA_MASS	PA_MASS
39	primary	old	125	PA_MASS	901	0	12	0	7	2018-06-15	2	1	8776	87	imputed	18,8	8,3	0	0,974826706318002	4,8	0,463993989782797	NA	NA	NA	NA	NA	NA	NA	NA	NA	NA	NA	NA	Male	0,505939123979212	T3	6,62047141796585	1,76210096510765	-0,893615441722346	juni	6	5	Week	Friday	72	-0,397921306607273	0	PA_MASS	PA_MASS
39	primary	old	125	PA_MASS	901	0	12	0	6	2018-05-21	4	1	16521	113	observed	19,2	11,5	0	0,974826706318002	4,8	0,463993989782797	NA	NA	NA	NA	NA	NA	NA	NA	NA	NA	85	5,25	Male	0,505939123979212	T2	7,02047141796585	4,96210096510765	-0,893615441722346	mei	5	1	Week	Monday	50	-22,3979213066073	0	PA_MASS	PA_MASS
39	primary	old	125	PA_MASS	905	1	12	0	6	2018-05-22	5	1	10051	35	observed	18,3	3,5	0,6	-0,918037769209912	5,21272618358619	0,876720173368989	NA	NA	NA	NA	NA	NA	NA	NA	NA	NA	56	3,8	Female	0,505939123979212	T2	6,12047141796585	-3,03789903489235	-0,293615441722346	mei	5	2	Week	Tuesday	68	-4,39792130660727	0	PA_MASS	PA_MASS
39	primary	old	125	PA_MASS	903	0	12	0	5	2018-02-28	1	1	14434	91	observed	-6,6	7,3	0	2,25212795325592	4	-0,336006010217202	7	6	6	6	6	6	4,33	6	6	6	100	6	Male	0,505939123979212	T1	-18,7795285820341	0,762100965107646	-0,893615441722346	februari	2	3	Week	Wednesday	69	-3,39792130660727	0	PA_MASS	PA_MASS
39	primary	old	125	PA_MASS	887	1	11	0	5	2018-02-28	1	1	13541	70	observed	-6,6	7,3	0	1,20613093199713	3,95	-0,386006010217203	2	3	0	4,5	4,67	1	1	5	3	4	63	4,15	Female	-0,494060876020788	T1	-18,7795285820341	0,762100965107646	-0,893615441722346	februari	2	3	Week	Wednesday	69	-3,39792130660727	0	PA_MASS	PA_MASS
39	primary	old	125	PA_MASS	903	0	12	0	6	2018-05-19	2	1	4248	8	observed	11	0,1	0	2,25212795325592	4	-0,336006010217202	NA	NA	NA	NA	NA	NA	NA	NA	NA	NA	NA	NA	Male	0,505939123979212	T2	-1,17952858203415	-6,43789903489235	-0,893615441722346	mei	5	6	Weekend	Saturday	83	10,6020786933927	0	PA_MASS	PA_MASS
39	primary	old	125	PA_MASS	903	0	12	0	6	2018-05-20	3	1	26434	209	observed	15,4	12,7	0	2,25212795325592	4	-0,336006010217202	NA	NA	NA	NA	NA	NA	NA	NA	NA	NA	NA	NA	Male	0,505939123979212	T2	3,22047141796585	6,16210096510765	-0,893615441722346	mei	5	0	Weekend	Sunday	70	-2,39792130660727	0	PA_MASS	PA_MASS
39	primary	old	125	PA_MASS	887	1	12	0	6	2018-05-19	2	1	7032	0	observed	11	0,1	0	1,20613093199713	3,95	-0,386006010217203	5	5	1	5,5	4	2,67	1,33	5	4	4,5	70	4,5	Female	0,505939123979212	T2	-1,17952858203415	-6,43789903489235	-0,893615441722346	mei	5	6	Weekend	Saturday	83	10,6020786933927	0	PA_MASS	PA_MASS
39	primary	old	125	PA_MASS	903	0	12	0	7	2018-06-15	2	1	5501	39	imputed	18,8	8,3	0	2,25212795325592	4	-0,336006010217202	NA	NA	NA	NA	NA	NA	NA	NA	NA	NA	100	6	Male	0,505939123979212	T3	6,62047141796585	1,76210096510765	-0,893615441722346	juni	6	5	Week	Friday	72	-0,397921306607273	0	PA_MASS	PA_MASS
39	primary	old	125	PA_MASS	902	0	13	0	6	2018-05-19	2	1	12062	0	imputed	11	0,1	0	1,98438244608787	2,992423178834	-1,3435828313832	NA	NA	NA	NA	NA	NA	NA	NA	NA	NA	0	1	Male	1,50593912397921	T2	-1,17952858203415	-6,43789903489235	-0,893615441722346	mei	5	6	Weekend	Saturday	83	10,6020786933927	0	PA_MASS	PA_MASS
39	primary	old	125	PA_MASS	902	0	13	0	7	2018-06-15	2	1	5531	0	imputed	18,8	8,3	0	1,98438244608787	2,992423178834	-1,3435828313832	NA	NA	NA	NA	NA	NA	NA	NA	NA	NA	74	4,7	Male	1,50593912397921	T3	6,62047141796585	1,76210096510765	-0,893615441722346	juni	6	5	Week	Friday	72	-0,397921306607273	0	PA_MASS	PA_MASS
39	primary	old	125	PA_MASS	902	0	13	0	7	2018-06-16	3	1	8077	0	imputed	17,5	3,2	0	1,98438244608787	2,992423178834	-1,3435828313832	NA	NA	NA	NA	NA	NA	NA	NA	NA	NA	74	4,7	Male	1,50593912397921	T3	5,32047141796585	-3,33789903489235	-0,893615441722346	juni	6	6	Weekend	Saturday	65	-7,39792130660727	0	PA_MASS	PA_MASS
39	primary	old	125	PA_MASS	901	0	12	0	6	2018-05-20	3	1	10341	75	observed	15,4	12,7	0	0,974826706318002	4,8	0,463993989782797	NA	NA	NA	NA	NA	NA	NA	NA	NA	NA	85	5,25	Male	0,505939123979212	T2	3,22047141796585	6,16210096510765	-0,893615441722346	mei	5	0	Weekend	Sunday	70	-2,39792130660727	0	PA_MASS	PA_MASS
39	primary	old	125	PA_MASS	901	0	12	0	6	2018-05-18	1	1	19306	156	observed	10,9	4,8	0	0,974826706318002	4,8	0,463993989782797	NA	NA	NA	NA	NA	NA	NA	NA	NA	NA	85	5,25	Male	0,505939123979212	T2	-1,27952858203415	-1,73789903489235	-0,893615441722346	mei	5	5	Week	Friday	69	-3,39792130660727	0	PA_MASS	PA_MASS
39	primary	old	125	PA_MASS	887	1	12	0	7	2018-06-18	5	1	2543	11	observed	16,7	2,1	0	1,20613093199713	3,95	-0,386006010217203	2	3	0	6	4,33	1	1	4	4	4	53	3,65	Female	0,505939123979212	T3	4,52047141796585	-4,43789903489235	-0,893615441722346	juni	6	1	Week	Monday	81	8,60207869339273	0	PA_MASS	PA_MASS
39	primary	old	125	PA_MASS	903	0	12	0	5	2018-03-02	3	1	12476	16	imputed	-3,7	6,8	0	2,25212795325592	4	-0,336006010217202	7	6	6	6	6	6	4,33	6	6	6	100	6	Male	0,505939123979212	T1	-15,8795285820342	0,262100965107646	-0,893615441722346	maart	3	5	Week	Friday	52	-20,3979213066073	0	PA_MASS	PA_MASS
39	primary	old	125	PA_MASS	900	1	11	0	6	2018-05-22	5	1	17827	105	observed	18,3	3,5	0,6	0,766016222388216	3,7	-0,636006010217202	3	5	4	6	6	1,33	1,67	6	5	5,5	100	6	Female	-0,494060876020788	T2	6,12047141796585	-3,03789903489235	-0,293615441722346	mei	5	2	Week	Tuesday	68	-4,39792130660727	0	PA_MASS	PA_MASS
39	primary	old	125	PA_MASS	886	0	11	0	5	2018-03-03	4	1	1084	0	observed	-1,7	1,8	0	1,31040207237821	3,4	-0,936006010217203	0	2	0	3,5	3	1	1	4	4	4	0	1	Male	-0,494060876020788	T1	-13,8795285820341	-4,73789903489235	-0,893615441722346	maart	3	6	Weekend	Saturday	64	-8,39792130660727	0	PA_MASS	PA_MASS
39	primary	old	125	PA_MASS	900	1	11	0	7	2018-06-14	1	1	10986	32	observed	15,7	3,2	1,2	0,766016222388216	3,7	-0,636006010217202	3	3	3	6	6	2,33	1	6	5	5,5	100	6	Female	-0,494060876020788	T3	3,52047141796585	-3,33789903489235	0,306384558277654	juni	6	4	Week	Thursday	80	7,60207869339273	0	PA_MASS	PA_MASS
39	primary	old	125	PA_MASS	900	1	11	0	7	2018-06-16	3	1	13032	37	imputed	17,5	3,2	0	0,766016222388216	3,7	-0,636006010217202	3	3	3	6	6	2,33	1	6	5	5,5	100	6	Female	-0,494060876020788	T3	5,32047141796585	-3,33789903489235	-0,893615441722346	juni	6	6	Weekend	Saturday	65	-7,39792130660727	0	PA_MASS	PA_MASS
39	primary	old	125	PA_MASS	903	0	12	0	6	2018-05-22	5	1	11061	45	observed	18,3	3,5	0,6	2,25212795325592	4	-0,336006010217202	NA	NA	NA	NA	NA	NA	NA	NA	NA	NA	NA	NA	Male	0,505939123979212	T2	6,12047141796585	-3,03789903489235	-0,293615441722346	mei	5	2	Week	Tuesday	68	-4,39792130660727	0	PA_MASS	PA_MASS
39	primary	old	125	PA_MASS	904	1	12	0	7	2018-06-16	3	1	12213	76	imputed	17,5	3,2	0	-0,680566403301576	6	1,6639939897828	NA	NA	NA	NA	NA	NA	NA	NA	NA	NA	100	6	Female	0,505939123979212	T3	5,32047141796585	-3,33789903489235	-0,893615441722346	juni	6	6	Weekend	Saturday	65	-7,39792130660727	0	PA_MASS	PA_MASS
39	primary	old	125	PA_MASS	901	0	12	0	5	2018-03-02	3	1	12064	81	observed	-3,7	6,8	0	0,974826706318002	4,8	0,463993989782797	3	3	4	6	6	1	1	6	6	6	100	6	Male	0,505939123979212	T1	-15,8795285820342	0,262100965107646	-0,893615441722346	maart	3	5	Week	Friday	52	-20,3979213066073	0	PA_MASS	PA_MASS
39	primary	old	125	PA_MASS	905	1	12	0	5	2018-03-02	3	1	9885	30	imputed	-3,7	6,8	0	-0,918037769209912	5,21272618358619	0,876720173368989	NA	NA	NA	5	4,67	1	1	NA	NA	NA	44	3,2	Female	0,505939123979212	T1	-15,8795285820342	0,262100965107646	-0,893615441722346	maart	3	5	Week	Friday	52	-20,3979213066073	0	PA_MASS	PA_MASS
39	primary	old	125	PA_MASS	905	1	12	0	5	2018-03-01	2	1	12941	34	imputed	-4,7	5,4	0	-0,918037769209912	5,21272618358619	0,876720173368989	NA	NA	NA	5	4,67	1	1	NA	NA	NA	44	3,2	Female	0,505939123979212	T1	-16,8795285820342	-1,13789903489235	-0,893615441722346	maart	3	4	Week	Thursday	50	-22,3979213066073	0	PA_MASS	PA_MASS
39	primary	old	125	PA_MASS	902	0	13	0	7	2018-06-14	1	1	9015	0	imputed	15,7	3,2	1,2	1,98438244608787	2,992423178834	-1,3435828313832	NA	NA	NA	NA	NA	NA	NA	NA	NA	NA	74	4,7	Male	1,50593912397921	T3	3,52047141796585	-3,33789903489235	0,306384558277654	juni	6	4	Week	Thursday	80	7,60207869339273	0	PA_MASS	PA_MASS
39	primary	old	125	PA_MASS	903	0	12	0	5	2018-03-01	2	1	14267	115	observed	-4,7	5,4	0	2,25212795325592	4	-0,336006010217202	7	6	6	6	6	6	4,33	6	6	6	100	6	Male	0,505939123979212	T1	-16,8795285820342	-1,13789903489235	-0,893615441722346	maart	3	4	Week	Thursday	50	-22,3979213066073	0	PA_MASS	PA_MASS
39	primary	old	125	PA_MASS	905	1	12	0	6	2018-05-19	2	1	7587	26	observed	11	0,1	0	-0,918037769209912	5,21272618358619	0,876720173368989	NA	NA	NA	NA	NA	NA	NA	NA	NA	NA	56	3,8	Female	0,505939123979212	T2	-1,17952858203415	-6,43789903489235	-0,893615441722346	mei	5	6	Weekend	Saturday	83	10,6020786933927	0	PA_MASS	PA_MASS
39	primary	old	125	PA_MASS	905	1	12	0	6	2018-05-18	1	1	15722	50	observed	10,9	4,8	0	-0,918037769209912	5,21272618358619	0,876720173368989	NA	NA	NA	NA	NA	NA	NA	NA	NA	NA	56	3,8	Female	0,505939123979212	T2	-1,27952858203415	-1,73789903489235	-0,893615441722346	mei	5	5	Week	Friday	69	-3,39792130660727	0	PA_MASS	PA_MASS
39	primary	old	125	PA_MASS	886	0	12	0	7	2018-06-15	2	1	3892	48	imputed	18,8	8,3	0	1,31040207237821	3,4	-0,936006010217203	NA	NA	NA	NA	NA	NA	NA	NA	NA	NA	NA	NA	Male	0,505939123979212	T3	6,62047141796585	1,76210096510765	-0,893615441722346	juni	6	5	Week	Friday	72	-0,397921306607273	0	PA_MASS	PA_MASS
39	primary	old	125	PA_MASS	887	1	11	0	5	2018-03-04	5	1	5605	0	observed	5	5	2,2	1,20613093199713	3,95	-0,386006010217203	2	3	0	4,5	4,67	1	1	5	3	4	63	4,15	Female	-0,494060876020788	T1	-7,17952858203415	-1,53789903489235	1,30638455827765	maart	3	0	Weekend	Sunday	78	5,60207869339273	0	PA_MASS	PA_MASS
39	primary	old	125	PA_MASS	887	1	11	0	5	2018-03-02	3	1	9458	33	observed	-3,7	6,8	0	1,20613093199713	3,95	-0,386006010217203	2	3	0	4,5	4,67	1	1	5	3	4	63	4,15	Female	-0,494060876020788	T1	-15,8795285820342	0,262100965107646	-0,893615441722346	maart	3	5	Week	Friday	52	-20,3979213066073	0	PA_MASS	PA_MASS
39	primary	old	125	PA_MASS	892	1	12	0	5	2018-03-02	3	1	5041	17	observed	-3,7	6,8	0	-1,17211394345462	4,07226092879254	-0,263745081424667	3	3	3	6	6	3,67	1	6	6	6	100	6	Female	0,505939123979212	T1	-15,8795285820342	0,262100965107646	-0,893615441722346	maart	3	5	Week	Friday	52	-20,3979213066073	0	PA_MASS	PA_MASS
39	primary	old	125	PA_MASS	892	1	12	0	5	2018-03-01	2	1	8872	54	observed	-4,7	5,4	0	-1,17211394345462	4,07226092879254	-0,263745081424667	3	3	3	6	6	3,67	1	6	6	6	100	6	Female	0,505939123979212	T1	-16,8795285820342	-1,13789903489235	-0,893615441722346	maart	3	4	Week	Thursday	50	-22,3979213066073	0	PA_MASS	PA_MASS
39	primary	old	125	PA_MASS	892	1	12	0	6	2018-05-20	3	1	3178	40	imputed	15,4	12,7	0	-1,17211394345462	4,07226092879254	-0,263745081424667	NA	NA	NA	NA	NA	NA	NA	NA	NA	NA	91	5,55	Female	0,505939123979212	T2	3,22047141796585	6,16210096510765	-0,893615441722346	mei	5	0	Weekend	Sunday	70	-2,39792130660727	0	PA_MASS	PA_MASS
39	primary	old	125	PA_MASS	887	1	12	0	6	2018-05-21	4	1	9727	34	observed	19,2	11,5	0	1,20613093199713	3,95	-0,386006010217203	5	5	1	5,5	4	2,67	1,33	5	4	4,5	70	4,5	Female	0,505939123979212	T2	7,02047141796585	4,96210096510765	-0,893615441722346	mei	5	1	Week	Monday	50	-22,3979213066073	0	PA_MASS	PA_MASS
39	primary	old	125	PA_MASS	887	1	12	0	6	2018-05-18	1	1	14456	38	observed	10,9	4,8	0	1,20613093199713	3,95	-0,386006010217203	5	5	1	5,5	4	2,67	1,33	5	4	4,5	70	4,5	Female	0,505939123979212	T2	-1,27952858203415	-1,73789903489235	-0,893615441722346	mei	5	5	Week	Friday	69	-3,39792130660727	0	PA_MASS	PA_MASS
39	primary	old	125	PA_MASS	887	1	12	0	7	2018-06-16	3	1	5546	14	observed	17,5	3,2	0	1,20613093199713	3,95	-0,386006010217203	2	3	0	6	4,33	1	1	4	4	4	53	3,65	Female	0,505939123979212	T3	5,32047141796585	-3,33789903489235	-0,893615441722346	juni	6	6	Weekend	Saturday	65	-7,39792130660727	0	PA_MASS	PA_MASS
39	primary	old	125	PA_MASS	905	1	12	0	5	2018-02-28	1	1	6898	45	observed	-6,6	7,3	0	-0,918037769209912	5,21272618358619	0,876720173368989	NA	NA	NA	5	4,67	1	1	NA	NA	NA	44	3,2	Female	0,505939123979212	T1	-18,7795285820341	0,762100965107646	-0,893615441722346	februari	2	3	Week	Wednesday	69	-3,39792130660727	0	PA_MASS	PA_MASS
39	primary	old	125	PA_MASS	905	1	12	0	6	2018-05-20	3	1	16445	105	observed	15,4	12,7	0	-0,918037769209912	5,21272618358619	0,876720173368989	NA	NA	NA	NA	NA	NA	NA	NA	NA	NA	56	3,8	Female	0,505939123979212	T2	3,22047141796585	6,16210096510765	-0,893615441722346	mei	5	0	Weekend	Sunday	70	-2,39792130660727	0	PA_MASS	PA_MASS
39	primary	old	125	PA_MASS	887	1	12	0	7	2018-06-15	2	1	5637	0	imputed	18,8	8,3	0	1,20613093199713	3,95	-0,386006010217203	2	3	0	6	4,33	1	1	4	4	4	53	3,65	Female	0,505939123979212	T3	6,62047141796585	1,76210096510765	-0,893615441722346	juni	6	5	Week	Friday	72	-0,397921306607273	0	PA_MASS	PA_MASS
39	primary	old	125	PA_MASS	894	0	12	0	5	2018-03-01	2	1	14839	83	observed	-4,7	5,4	0	1,55286004544127	4,02069880459644	-0,31530720562076	7	7	6	2	3,67	5	5	4	4	4	100	6	Male	0,505939123979212	T1	-16,8795285820342	-1,13789903489235	-0,893615441722346	maart	3	4	Week	Thursday	50	-22,3979213066073	0	PA_MASS	PA_MASS
39	primary	old	125	PA_MASS	894	0	12	0	5	2018-03-03	4	1	11424	82	observed	-1,7	1,8	0	1,55286004544127	4,02069880459644	-0,31530720562076	7	7	6	2	3,67	5	5	4	4	4	100	6	Male	0,505939123979212	T1	-13,8795285820341	-4,73789903489235	-0,893615441722346	maart	3	6	Weekend	Saturday	64	-8,39792130660727	0	PA_MASS	PA_MASS
39	primary	old	125	PA_MASS	894	0	12	0	5	2018-03-04	5	1	6605	7	observed	5	5	2,2	1,55286004544127	4,02069880459644	-0,31530720562076	7	7	6	2	3,67	5	5	4	4	4	100	6	Male	0,505939123979212	T1	-7,17952858203415	-1,53789903489235	1,30638455827765	maart	3	0	Weekend	Sunday	78	5,60207869339273	0	PA_MASS	PA_MASS
39	primary	old	125	PA_MASS	903	0	12	0	6	2018-05-18	1	1	17981	125	observed	10,9	4,8	0	2,25212795325592	4	-0,336006010217202	NA	NA	NA	NA	NA	NA	NA	NA	NA	NA	NA	NA	Male	0,505939123979212	T2	-1,27952858203415	-1,73789903489235	-0,893615441722346	mei	5	5	Week	Friday	69	-3,39792130660727	0	PA_MASS	PA_MASS
39	primary	old	125	PA_MASS	903	0	12	0	6	2018-05-21	4	1	4735	12	observed	19,2	11,5	0	2,25212795325592	4	-0,336006010217202	NA	NA	NA	NA	NA	NA	NA	NA	NA	NA	NA	NA	Male	0,505939123979212	T2	7,02047141796585	4,96210096510765	-0,893615441722346	mei	5	1	Week	Monday	50	-22,3979213066073	0	PA_MASS	PA_MASS
39	primary	old	125	PA_MASS	890	1	12	0	5	2018-02-28	1	1	11773	38	observed	-6,6	7,3	0	1,61355220228402	4,95	0,613993989782797	3	3	3	6	6	2	1	6	6	6	100	6	Female	0,505939123979212	T1	-18,7795285820341	0,762100965107646	-0,893615441722346	februari	2	3	Week	Wednesday	69	-3,39792130660727	0	PA_MASS	PA_MASS
39	primary	old	125	PA_MASS	890	1	12	0	6	2018-05-19	2	1	3211	0	observed	11	0,1	0	1,61355220228402	4,95	0,613993989782797	2	4	3	6	6	1,67	1	6	6	6	100	6	Female	0,505939123979212	T2	-1,17952858203415	-6,43789903489235	-0,893615441722346	mei	5	6	Weekend	Saturday	83	10,6020786933927	0	PA_MASS	PA_MASS
39	primary	old	125	PA_MASS	890	1	12	0	6	2018-05-22	5	1	5609	18	observed	18,3	3,5	0,6	1,61355220228402	4,95	0,613993989782797	2	4	3	6	6	1,67	1	6	6	6	100	6	Female	0,505939123979212	T2	6,12047141796585	-3,03789903489235	-0,293615441722346	mei	5	2	Week	Tuesday	68	-4,39792130660727	0	PA_MASS	PA_MASS
39	primary	old	125	PA_MASS	903	0	12	0	7	2018-06-16	3	1	5884	162	imputed	17,5	3,2	0	2,25212795325592	4	-0,336006010217202	NA	NA	NA	NA	NA	NA	NA	NA	NA	NA	100	6	Male	0,505939123979212	T3	5,32047141796585	-3,33789903489235	-0,893615441722346	juni	6	6	Weekend	Saturday	65	-7,39792130660727	0	PA_MASS	PA_MASS
39	primary	old	125	PA_MASS	903	0	12	0	7	2018-06-14	1	1	2724	21	observed	15,7	3,2	1,2	2,25212795325592	4	-0,336006010217202	NA	NA	NA	NA	NA	NA	NA	NA	NA	NA	100	6	Male	0,505939123979212	T3	3,52047141796585	-3,33789903489235	0,306384558277654	juni	6	4	Week	Thursday	80	7,60207869339273	0	PA_MASS	PA_MASS
39	primary	old	125	PA_MASS	887	1	12	0	7	2018-06-14	1	1	9083	32	observed	15,7	3,2	1,2	1,20613093199713	3,95	-0,386006010217203	2	3	0	6	4,33	1	1	4	4	4	53	3,65	Female	0,505939123979212	T3	3,52047141796585	-3,33789903489235	0,306384558277654	juni	6	4	Week	Thursday	80	7,60207869339273	0	PA_MASS	PA_MASS
39	primary	old	125	PA_MASS	887	1	12	0	7	2018-06-17	4	1	6107	0	observed	15,6	0,4	0	1,20613093199713	3,95	-0,386006010217203	2	3	0	6	4,33	1	1	4	4	4	53	3,65	Female	0,505939123979212	T3	3,42047141796585	-6,13789903489235	-0,893615441722346	juni	6	0	Weekend	Sunday	75	2,60207869339273	0	PA_MASS	PA_MASS
39	primary	old	125	PA_MASS	904	1	12	0	5	2018-03-02	3	1	14515	58	imputed	-3,7	6,8	0	-0,680566403301576	6	1,6639939897828	NA	NA	NA	6	6	1	1	NA	NA	NA	100	6	Female	0,505939123979212	T1	-15,8795285820342	0,262100965107646	-0,893615441722346	maart	3	5	Week	Friday	52	-20,3979213066073	0	PA_MASS	PA_MASS
39	primary	old	125	PA_MASS	904	1	12	0	5	2018-03-01	2	1	6976	34	observed	-4,7	5,4	0	-0,680566403301576	6	1,6639939897828	NA	NA	NA	6	6	1	1	NA	NA	NA	100	6	Female	0,505939123979212	T1	-16,8795285820342	-1,13789903489235	-0,893615441722346	maart	3	4	Week	Thursday	50	-22,3979213066073	0	PA_MASS	PA_MASS
39	primary	old	125	PA_MASS	904	1	12	0	6	2018-05-22	5	1	7558	35	observed	18,3	3,5	0,6	-0,680566403301576	6	1,6639939897828	NA	NA	NA	NA	NA	NA	NA	NA	NA	NA	NA	NA	Female	0,505939123979212	T2	6,12047141796585	-3,03789903489235	-0,293615441722346	mei	5	2	Week	Tuesday	68	-4,39792130660727	0	PA_MASS	PA_MASS
39	primary	old	125	PA_MASS	890	1	12	0	7	2018-06-16	3	1	6326	0	imputed	17,5	3,2	0	1,61355220228402	4,95	0,613993989782797	3	4	3	6	6	1,33	1	6	6	6	100	6	Female	0,505939123979212	T3	5,32047141796585	-3,33789903489235	-0,893615441722346	juni	6	6	Weekend	Saturday	65	-7,39792130660727	0	PA_MASS	PA_MASS
39	primary	old	125	PA_MASS	891	0	11	0	5	2018-02-28	1	1	13917	108	observed	-6,6	7,3	0	2,47762485042185	3,45	-0,886006010217202	7	4	7	6	6	1	1	6	6	6	100	6	Male	-0,494060876020788	T1	-18,7795285820341	0,762100965107646	-0,893615441722346	februari	2	3	Week	Wednesday	69	-3,39792130660727	0	PA_MASS	PA_MASS
39	primary	old	125	PA_MASS	891	0	11	0	5	2018-03-01	2	1	12435	86	observed	-4,7	5,4	0	2,47762485042185	3,45	-0,886006010217202	7	4	7	6	6	1	1	6	6	6	100	6	Male	-0,494060876020788	T1	-16,8795285820342	-1,13789903489235	-0,893615441722346	maart	3	4	Week	Thursday	50	-22,3979213066073	0	PA_MASS	PA_MASS
39	primary	old	125	PA_MASS	891	0	11	0	5	2018-03-02	3	1	15691	139	observed	-3,7	6,8	0	2,47762485042185	3,45	-0,886006010217202	7	4	7	6	6	1	1	6	6	6	100	6	Male	-0,494060876020788	T1	-15,8795285820342	0,262100965107646	-0,893615441722346	maart	3	5	Week	Friday	52	-20,3979213066073	0	PA_MASS	PA_MASS
39	primary	old	125	PA_MASS	901	0	12	0	5	2018-03-04	5	1	3713	0	observed	5	5	2,2	0,974826706318002	4,8	0,463993989782797	3	3	4	6	6	1	1	6	6	6	100	6	Male	0,505939123979212	T1	-7,17952858203415	-1,53789903489235	1,30638455827765	maart	3	0	Weekend	Sunday	78	5,60207869339273	0	PA_MASS	PA_MASS
39	primary	old	125	PA_MASS	901	0	12	0	5	2018-03-03	4	1	5844	0	observed	-1,7	1,8	0	0,974826706318002	4,8	0,463993989782797	3	3	4	6	6	1	1	6	6	6	100	6	Male	0,505939123979212	T1	-13,8795285820341	-4,73789903489235	-0,893615441722346	maart	3	6	Weekend	Saturday	64	-8,39792130660727	0	PA_MASS	PA_MASS
39	primary	old	125	PA_MASS	904	1	12	0	7	2018-06-14	1	1	1685	0	observed	15,7	3,2	1,2	-0,680566403301576	6	1,6639939897828	NA	NA	NA	NA	NA	NA	NA	NA	NA	NA	100	6	Female	0,505939123979212	T3	3,52047141796585	-3,33789903489235	0,306384558277654	juni	6	4	Week	Thursday	80	7,60207869339273	0	PA_MASS	PA_MASS
39	primary	old	125	PA_MASS	886	0	12	0	6	2018-05-22	5	1	10111	6	observed	18,3	3,5	0,6	1,31040207237821	3,4	-0,936006010217203	NA	NA	NA	NA	NA	NA	NA	NA	NA	NA	NA	NA	Male	0,505939123979212	T2	6,12047141796585	-3,03789903489235	-0,293615441722346	mei	5	2	Week	Tuesday	68	-4,39792130660727	0	PA_MASS	PA_MASS
39	primary	old	125	PA_MASS	886	0	12	0	6	2018-05-21	4	1	4659	28	observed	19,2	11,5	0	1,31040207237821	3,4	-0,936006010217203	NA	NA	NA	NA	NA	NA	NA	NA	NA	NA	NA	NA	Male	0,505939123979212	T2	7,02047141796585	4,96210096510765	-0,893615441722346	mei	5	1	Week	Monday	50	-22,3979213066073	0	PA_MASS	PA_MASS
39	primary	old	125	PA_MASS	886	0	12	0	6	2018-05-18	1	1	13146	42	observed	10,9	4,8	0	1,31040207237821	3,4	-0,936006010217203	NA	NA	NA	NA	NA	NA	NA	NA	NA	NA	NA	NA	Male	0,505939123979212	T2	-1,27952858203415	-1,73789903489235	-0,893615441722346	mei	5	5	Week	Friday	69	-3,39792130660727	0	PA_MASS	PA_MASS
39	primary	old	125	PA_MASS	886	0	12	0	6	2018-05-19	2	1	8027	13	observed	11	0,1	0	1,31040207237821	3,4	-0,936006010217203	NA	NA	NA	NA	NA	NA	NA	NA	NA	NA	NA	NA	Male	0,505939123979212	T2	-1,17952858203415	-6,43789903489235	-0,893615441722346	mei	5	6	Weekend	Saturday	83	10,6020786933927	0	PA_MASS	PA_MASS
39	primary	old	125	PA_MASS	886	0	12	0	7	2018-06-14	1	1	2458	0	observed	15,7	3,2	1,2	1,31040207237821	3,4	-0,936006010217203	NA	NA	NA	NA	NA	NA	NA	NA	NA	NA	NA	NA	Male	0,505939123979212	T3	3,52047141796585	-3,33789903489235	0,306384558277654	juni	6	4	Week	Thursday	80	7,60207869339273	0	PA_MASS	PA_MASS
39	primary	old	125	PA_MASS	886	0	12	0	7	2018-06-16	3	1	10210	14	imputed	17,5	3,2	0	1,31040207237821	3,4	-0,936006010217203	NA	NA	NA	NA	NA	NA	NA	NA	NA	NA	NA	NA	Male	0,505939123979212	T3	5,32047141796585	-3,33789903489235	-0,893615441722346	juni	6	6	Weekend	Saturday	65	-7,39792130660727	0	PA_MASS	PA_MASS
39	primary	old	125	PA_MASS	891	0	12	0	7	2018-06-14	1	1	11014	60	observed	15,7	3,2	1,2	2,47762485042185	3,45	-0,886006010217202	6	5	5	3,5	4,33	3,33	3,33	5	5	5	100	6	Male	0,505939123979212	T3	3,52047141796585	-3,33789903489235	0,306384558277654	juni	6	4	Week	Thursday	80	7,60207869339273	0	PA_MASS	PA_MASS
39	primary	old	125	PA_MASS	891	0	12	0	7	2018-06-16	3	1	14790	69	observed	17,5	3,2	0	2,47762485042185	3,45	-0,886006010217202	6	5	5	3,5	4,33	3,33	3,33	5	5	5	100	6	Male	0,505939123979212	T3	5,32047141796585	-3,33789903489235	-0,893615441722346	juni	6	6	Weekend	Saturday	65	-7,39792130660727	0	PA_MASS	PA_MASS
39	primary	old	125	PA_MASS	892	1	12	0	5	2018-02-28	1	1	12998	58	observed	-6,6	7,3	0	-1,17211394345462	4,07226092879254	-0,263745081424667	3	3	3	6	6	3,67	1	6	6	6	100	6	Female	0,505939123979212	T1	-18,7795285820341	0,762100965107646	-0,893615441722346	februari	2	3	Week	Wednesday	69	-3,39792130660727	0	PA_MASS	PA_MASS
39	primary	old	125	PA_MASS	898	1	12	0	7	2018-06-18	5	1	2319	9	observed	16,7	2,1	0	0,382378564840133	3,5	-0,836006010217202	NA	NA	NA	NA	NA	NA	NA	NA	NA	NA	76	4,8	Female	0,505939123979212	T3	4,52047141796585	-4,43789903489235	-0,893615441722346	juni	6	1	Week	Monday	81	8,60207869339273	0	PA_MASS	PA_MASS
39	primary	old	125	PA_MASS	898	1	12	0	7	2018-06-15	2	1	9371	22	observed	18,8	8,3	0	0,382378564840133	3,5	-0,836006010217202	NA	NA	NA	NA	NA	NA	NA	NA	NA	NA	76	4,8	Female	0,505939123979212	T3	6,62047141796585	1,76210096510765	-0,893615441722346	juni	6	5	Week	Friday	72	-0,397921306607273	0	PA_MASS	PA_MASS
39	primary	old	125	PA_MASS	898	1	12	0	7	2018-06-14	1	1	3538	15	observed	15,7	3,2	1,2	0,382378564840133	3,5	-0,836006010217202	NA	NA	NA	NA	NA	NA	NA	NA	NA	NA	76	4,8	Female	0,505939123979212	T3	3,52047141796585	-3,33789903489235	0,306384558277654	juni	6	4	Week	Thursday	80	7,60207869339273	0	PA_MASS	PA_MASS
39	primary	old	125	PA_MASS	892	1	12	0	6	2018-05-18	1	1	11765	47	observed	10,9	4,8	0	-1,17211394345462	4,07226092879254	-0,263745081424667	NA	NA	NA	NA	NA	NA	NA	NA	NA	NA	91	5,55	Female	0,505939123979212	T2	-1,27952858203415	-1,73789903489235	-0,893615441722346	mei	5	5	Week	Friday	69	-3,39792130660727	0	PA_MASS	PA_MASS
39	primary	old	125	PA_MASS	892	1	12	0	6	2018-05-19	2	1	4628	56	imputed	11	0,1	0	-1,17211394345462	4,07226092879254	-0,263745081424667	NA	NA	NA	NA	NA	NA	NA	NA	NA	NA	91	5,55	Female	0,505939123979212	T2	-1,17952858203415	-6,43789903489235	-0,893615441722346	mei	5	6	Weekend	Saturday	83	10,6020786933927	0	PA_MASS	PA_MASS
39	primary	old	125	PA_MASS	892	1	12	0	7	2018-06-15	2	1	12916	34	imputed	18,8	8,3	0	-1,17211394345462	4,07226092879254	-0,263745081424667	NA	NA	NA	NA	NA	NA	NA	NA	NA	NA	NA	NA	Female	0,505939123979212	T3	6,62047141796585	1,76210096510765	-0,893615441722346	juni	6	5	Week	Friday	72	-0,397921306607273	0	PA_MASS	PA_MASS
39	primary	old	125	PA_MASS	892	1	12	0	7	2018-06-16	3	1	2061	28	imputed	17,5	3,2	0	-1,17211394345462	4,07226092879254	-0,263745081424667	NA	NA	NA	NA	NA	NA	NA	NA	NA	NA	NA	NA	Female	0,505939123979212	T3	5,32047141796585	-3,33789903489235	-0,893615441722346	juni	6	6	Weekend	Saturday	65	-7,39792130660727	0	PA_MASS	PA_MASS
39	primary	old	125	PA_MASS	892	1	12	0	7	2018-06-14	1	1	1053	0	observed	15,7	3,2	1,2	-1,17211394345462	4,07226092879254	-0,263745081424667	NA	NA	NA	NA	NA	NA	NA	NA	NA	NA	NA	NA	Female	0,505939123979212	T3	3,52047141796585	-3,33789903489235	0,306384558277654	juni	6	4	Week	Thursday	80	7,60207869339273	0	PA_MASS	PA_MASS
39	primary	old	125	PA_MASS	894	0	12	0	5	2018-02-28	1	1	19716	157	observed	-6,6	7,3	0	1,55286004544127	4,02069880459644	-0,31530720562076	7	7	6	2	3,67	5	5	4	4	4	100	6	Male	0,505939123979212	T1	-18,7795285820341	0,762100965107646	-0,893615441722346	februari	2	3	Week	Wednesday	69	-3,39792130660727	0	PA_MASS	PA_MASS
[truncated: 4,070 more rows]
[truncated: 2 more columns]
