# Supplementary material for: Testing a Social Network Intervention Using Vlogs to Promote Physical Activity Among Adolescents: A Randomized Controlled Trial
Source: Front Psychol. 2020 Jan 10;10:2913. doi: 10.3389/fpsyg.2019.02913 (PMC6967297; doi:10.3389/fpsyg.2019.02913)
Supplement: DATA SHEET S1 — Supporting data and syntax. [file Data_Sheet_1.ZIP › Exposure.csv]

Participant	School	Class	Child	PI	Format	Name	Exposure	Time_exposure	Likes	Shares_class	Shares_indiv	Day	Wave	WaveF
4227905561	42	279	3561	0	video	BoysVsGirls	0	0	0	0	0	4	6	Intervention measure
4227905562	42	279	3562	0	video	BoysVsGirls	1	61	0	0	0	4	6	Intervention measure
4227905563	42	279	3563	0	video	BoysVsGirls	1	65	0	0	0	4	6	Intervention measure
4227905564	42	279	3564	0	video	BoysVsGirls	0	0	0	0	0	4	6	Intervention measure
4227905567	42	279	3567	0	video	BoysVsGirls	0	0	0	0	0	4	6	Intervention measure
4227905568	42	279	3568	0	video	BoysVsGirls	0	0	0	0	0	4	6	Intervention measure
4227905570	42	279	3570	0	video	BoysVsGirls	0	0	0	0	0	4	6	Intervention measure
4227905571	42	279	3571	0	video	BoysVsGirls	0	0	0	0	0	4	6	Intervention measure
4227905572	42	279	3572	0	video	BoysVsGirls	0	0	0	0	0	4	6	Intervention measure
4227905573	42	279	3573	0	video	BoysVsGirls	1	65	0	0	0	4	6	Intervention measure
4227905575	42	279	3575	0	video	BoysVsGirls	0	0	0	0	0	4	6	Intervention measure
4227905580	42	279	3580	0	video	BoysVsGirls	0	0	0	0	0	4	6	Intervention measure
4227905581	42	279	3581	0	video	BoysVsGirls	1	62	0	0	0	4	6	Intervention measure
4227905582	42	279	3582	0	video	BoysVsGirls	0	0	0	0	0	4	6	Intervention measure
4227905584	42	279	3584	0	video	BoysVsGirls	0	0	0	0	0	4	6	Intervention measure
4227905586	42	279	3586	0	video	BoysVsGirls	1	65	0	0	0	4	6	Intervention measure
4227905587	42	279	3587	0	video	BoysVsGirls	1	64	0	0	0	4	6	Intervention measure
4227905561	42	279	3561	0	video	Challange	1	13	0	0	0	3	6	Intervention measure
4227905562	42	279	3562	0	video	Challange	0	0	0	0	0	3	6	Intervention measure
4227905563	42	279	3563	0	video	Challange	2	44	0	0	0	3	6	Intervention measure
4227905564	42	279	3564	0	video	Challange	0	0	0	0	0	3	6	Intervention measure
4227905567	42	279	3567	0	video	Challange	0	0	0	0	0	3	6	Intervention measure
4227905568	42	279	3568	0	video	Challange	0	0	0	0	0	3	6	Intervention measure
4227905570	42	279	3570	0	video	Challange	0	0	0	0	0	3	6	Intervention measure
4227905571	42	279	3571	0	video	Challange	0	0	0	0	0	3	6	Intervention measure
4227905572	42	279	3572	0	video	Challange	0	0	0	0	0	3	6	Intervention measure
4227905573	42	279	3573	0	video	Challange	0	0	0	0	0	3	6	Intervention measure
4227905575	42	279	3575	0	video	Challange	0	0	0	0	0	3	6	Intervention measure
4227905580	42	279	3580	0	video	Challange	0	0	0	0	0	3	6	Intervention measure
4227905581	42	279	3581	0	video	Challange	0	0	0	0	0	3	6	Intervention measure
4227905582	42	279	3582	0	video	Challange	0	0	0	0	0	3	6	Intervention measure
4227905584	42	279	3584	0	video	Challange	0	0	0	0	0	3	6	Intervention measure
4227905586	42	279	3586	0	video	Challange	3	43	0	0	0	3	6	Intervention measure
4227905587	42	279	3587	0	video	Challange	2	80	0	0	0	3	6	Intervention measure
4227905561	42	279	3561	0	video	CouchPotato	0	0	0	0	0	5	6	Intervention measure
4227905562	42	279	3562	0	video	CouchPotato	0	0	0	0	0	5	6	Intervention measure
4227905563	42	279	3563	0	video	CouchPotato	1	43	0	0	0	5	6	Intervention measure
4227905564	42	279	3564	0	video	CouchPotato	0	0	0	0	0	5	6	Intervention measure
4227905567	42	279	3567	0	video	CouchPotato	0	0	0	0	0	5	6	Intervention measure
4227905568	42	279	3568	0	video	CouchPotato	0	0	0	0	0	5	6	Intervention measure
4227905570	42	279	3570	0	video	CouchPotato	0	0	0	0	0	5	6	Intervention measure
4227905571	42	279	3571	0	video	CouchPotato	0	0	0	0	0	5	6	Intervention measure
4227905572	42	279	3572	0	video	CouchPotato	0	0	0	0	0	5	6	Intervention measure
4227905573	42	279	3573	0	video	CouchPotato	1	43	0	0	0	5	6	Intervention measure
4227905575	42	279	3575	0	video	CouchPotato	0	0	0	0	0	5	6	Intervention measure
4227905580	42	279	3580	0	video	CouchPotato	0	0	0	0	0	5	6	Intervention measure
4227905581	42	279	3581	0	video	CouchPotato	0	0	0	0	0	5	6	Intervention measure
4227905582	42	279	3582	0	video	CouchPotato	0	0	0	0	0	5	6	Intervention measure
4227905584	42	279	3584	0	video	CouchPotato	0	0	0	0	0	5	6	Intervention measure
4227905586	42	279	3586	0	video	CouchPotato	1	43	0	0	0	5	6	Intervention measure
4227905587	42	279	3587	0	video	CouchPotato	1	43	0	0	0	5	6	Intervention measure
4227905561	42	279	3561	0	video	Motivate	0	0	0	0	0	2	6	Intervention measure
4227905562	42	279	3562	0	video	Motivate	0	0	0	0	0	2	6	Intervention measure
4227905563	42	279	3563	0	video	Motivate	1	79	0	0	0	2	6	Intervention measure
4227905564	42	279	3564	0	video	Motivate	0	0	0	0	0	2	6	Intervention measure
4227905567	42	279	3567	0	video	Motivate	0	0	0	0	0	2	6	Intervention measure
4227905568	42	279	3568	0	video	Motivate	0	0	0	0	0	2	6	Intervention measure
4227905570	42	279	3570	0	video	Motivate	0	0	0	0	0	2	6	Intervention measure
4227905571	42	279	3571	0	video	Motivate	0	0	0	0	0	2	6	Intervention measure
4227905572	42	279	3572	0	video	Motivate	0	0	0	0	0	2	6	Intervention measure
4227905573	42	279	3573	0	video	Motivate	0	0	0	0	0	2	6	Intervention measure
4227905575	42	279	3575	0	video	Motivate	1	63	0	0	0	2	6	Intervention measure
4227905580	42	279	3580	0	video	Motivate	0	0	0	0	0	2	6	Intervention measure
4227905581	42	279	3581	0	video	Motivate	0	0	0	0	0	2	6	Intervention measure
4227905582	42	279	3582	0	video	Motivate	2	84	0	0	0	2	6	Intervention measure
4227905584	42	279	3584	0	video	Motivate	0	0	0	0	0	2	6	Intervention measure
4227905586	42	279	3586	0	video	Motivate	1	79	0	0	0	2	6	Intervention measure
4227905587	42	279	3587	0	video	Motivate	0	0	0	0	0	2	6	Intervention measure
4227905561	42	279	3561	0	video	Voorstel	1	32	0	0	0	0	6	Intervention measure
4227905562	42	279	3562	0	video	Voorstel	1	10	0	0	0	0	6	Intervention measure
4227905563	42	279	3563	0	video	Voorstel	4	98	0	0	0	0	6	Intervention measure
4227905564	42	279	3564	0	video	Voorstel	1	32	0	0	0	0	6	Intervention measure
4227905567	42	279	3567	0	video	Voorstel	0	0	0	0	0	0	6	Intervention measure
4227905568	42	279	3568	0	video	Voorstel	0	0	0	0	0	0	6	Intervention measure
4227905570	42	279	3570	0	video	Voorstel	0	0	0	0	0	0	6	Intervention measure
4227905571	42	279	3571	0	video	Voorstel	0	0	0	0	0	0	6	Intervention measure
4227905572	42	279	3572	0	video	Voorstel	0	0	0	0	0	0	6	Intervention measure
4227905573	42	279	3573	0	video	Voorstel	1	32	0	0	0	0	6	Intervention measure
4227905575	42	279	3575	0	video	Voorstel	1	32	0	0	0	0	6	Intervention measure
4227905580	42	279	3580	0	video	Voorstel	0	0	0	0	0	0	6	Intervention measure
4227905581	42	279	3581	0	video	Voorstel	3	96	0	0	0	0	6	Intervention measure
4227905582	42	279	3582	0	video	Voorstel	2	34	0	0	0	0	6	Intervention measure
4227905584	42	279	3584	0	video	Voorstel	3	96	0	0	0	0	6	Intervention measure
4227905586	42	279	3586	0	video	Voorstel	2	52	0	0	0	0	6	Intervention measure
4227905587	42	279	3587	0	video	Voorstel	0	0	0	0	0	0	6	Intervention measure
4227905561	42	279	3561	0	video	YourMovez	0	0	0	0	0	1	6	Intervention measure
4227905562	42	279	3562	0	video	YourMovez	1	60	0	0	0	1	6	Intervention measure
4227905563	42	279	3563	0	video	YourMovez	2	65	0	0	0	1	6	Intervention measure
4227905564	42	279	3564	0	video	YourMovez	2	120	0	0	0	1	6	Intervention measure
4227905567	42	279	3567	0	video	YourMovez	0	0	0	0	0	1	6	Intervention measure
4227905568	42	279	3568	0	video	YourMovez	0	0	0	0	0	1	6	Intervention measure
4227905570	42	279	3570	0	video	YourMovez	0	0	0	0	0	1	6	Intervention measure
4227905571	42	279	3571	0	video	YourMovez	0	0	0	0	0	1	6	Intervention measure
4227905572	42	279	3572	0	video	YourMovez	0	0	0	0	0	1	6	Intervention measure
4227905573	42	279	3573	0	video	YourMovez	0	0	0	0	0	1	6	Intervention measure
4227905575	42	279	3575	0	video	YourMovez	1	39	0	0	0	1	6	Intervention measure
4227905580	42	279	3580	0	video	YourMovez	0	0	0	0	0	1	6	Intervention measure
4227905581	42	279	3581	0	video	YourMovez	1	60	0	0	0	1	6	Intervention measure
4227905582	42	279	3582	0	video	YourMovez	1	60	0	0	0	1	6	Intervention measure
4227905584	42	279	3584	0	video	YourMovez	0	0	0	0	0	1	6	Intervention measure
4227905586	42	279	3586	0	video	YourMovez	2	82	0	0	1	1	6	Intervention measure
4227905587	42	279	3587	0	video	YourMovez	0	0	0	0	0	1	6	Intervention measure
4227705510	42	277	3510	0	video	BoysVsGirls	1	63	0	0	0	4	6	Intervention measure
4227705511	42	277	3511	0	video	BoysVsGirls	0	0	0	0	0	4	6	Intervention measure
4227705513	42	277	3513	0	video	BoysVsGirls	0	0	0	0	0	4	6	Intervention measure
4227705516	42	277	3516	0	video	BoysVsGirls	0	0	0	0	0	4	6	Intervention measure
4227705517	42	277	3517	0	video	BoysVsGirls	0	0	0	0	0	4	6	Intervention measure
4227705520	42	277	3520	0	video	BoysVsGirls	1	63	0	0	0	4	6	Intervention measure
4227705521	42	277	3521	0	video	BoysVsGirls	0	0	0	0	0	4	6	Intervention measure
4227705524	42	277	3524	0	video	BoysVsGirls	0	0	0	0	0	4	6	Intervention measure
4227705525	42	277	3525	0	video	BoysVsGirls	0	0	0	0	0	4	6	Intervention measure
4227705526	42	277	3526	0	video	BoysVsGirls	0	0	0	0	0	4	6	Intervention measure
4227705527	42	277	3527	0	video	BoysVsGirls	0	0	0	0	0	4	6	Intervention measure
4227705531	42	277	3531	0	video	BoysVsGirls	0	0	0	0	0	4	6	Intervention measure
4227705534	42	277	3534	0	video	BoysVsGirls	0	0	0	0	0	4	6	Intervention measure
4227705510	42	277	3510	0	video	Challange	1	25	0	0	0	3	6	Intervention measure
4227705511	42	277	3511	0	video	Challange	0	0	0	0	0	3	6	Intervention measure
4227705513	42	277	3513	0	video	Challange	0	0	0	0	0	3	6	Intervention measure
4227705516	42	277	3516	0	video	Challange	0	0	0	0	0	3	6	Intervention measure
4227705517	42	277	3517	0	video	Challange	0	0	0	0	0	3	6	Intervention measure
4227705520	42	277	3520	0	video	Challange	0	0	0	0	0	3	6	Intervention measure
4227705521	42	277	3521	0	video	Challange	0	0	0	0	0	3	6	Intervention measure
4227705524	42	277	3524	0	video	Challange	0	0	0	0	0	3	6	Intervention measure
4227705525	42	277	3525	0	video	Challange	0	0	0	0	0	3	6	Intervention measure
4227705526	42	277	3526	0	video	Challange	0	0	0	0	0	3	6	Intervention measure
4227705527	42	277	3527	0	video	Challange	0	0	0	0	0	3	6	Intervention measure
4227705531	42	277	3531	0	video	Challange	0	0	0	0	0	3	6	Intervention measure
4227705534	42	277	3534	0	video	Challange	1	25	0	0	0	3	6	Intervention measure
4227705510	42	277	3510	0	video	CouchPotato	2	60	0	0	0	5	6	Intervention measure
4227705511	42	277	3511	0	video	CouchPotato	0	0	0	0	0	5	6	Intervention measure
4227705513	42	277	3513	0	video	CouchPotato	0	0	0	0	0	5	6	Intervention measure
4227705516	42	277	3516	0	video	CouchPotato	0	0	0	0	0	5	6	Intervention measure
4227705517	42	277	3517	0	video	CouchPotato	0	0	0	0	0	5	6	Intervention measure
4227705520	42	277	3520	0	video	CouchPotato	0	0	0	0	0	5	6	Intervention measure
4227705521	42	277	3521	0	video	CouchPotato	0	0	0	0	0	5	6	Intervention measure
4227705524	42	277	3524	0	video	CouchPotato	0	0	0	0	0	5	6	Intervention measure
4227705525	42	277	3525	0	video	CouchPotato	0	0	0	0	0	5	6	Intervention measure
4227705526	42	277	3526	0	video	CouchPotato	0	0	0	0	0	5	6	Intervention measure
4227705527	42	277	3527	0	video	CouchPotato	0	0	0	0	0	5	6	Intervention measure
4227705531	42	277	3531	0	video	CouchPotato	0	0	0	0	0	5	6	Intervention measure
4227705534	42	277	3534	0	video	CouchPotato	1	43	0	0	0	5	6	Intervention measure
4227705510	42	277	3510	0	video	Motivate	1	56	0	0	0	2	6	Intervention measure
4227705511	42	277	3511	0	video	Motivate	0	0	0	0	0	2	6	Intervention measure
4227705513	42	277	3513	0	video	Motivate	0	0	0	0	0	2	6	Intervention measure
4227705516	42	277	3516	0	video	Motivate	0	0	0	0	0	2	6	Intervention measure
4227705517	42	277	3517	0	video	Motivate	0	0	0	0	0	2	6	Intervention measure
4227705520	42	277	3520	0	video	Motivate	2	108	0	0	0	2	6	Intervention measure
4227705521	42	277	3521	0	video	Motivate	0	0	0	0	0	2	6	Intervention measure
4227705524	42	277	3524	0	video	Motivate	0	0	0	0	0	2	6	Intervention measure
4227705525	42	277	3525	0	video	Motivate	0	0	0	0	0	2	6	Intervention measure
4227705526	42	277	3526	0	video	Motivate	0	0	0	0	0	2	6	Intervention measure
4227705527	42	277	3527	0	video	Motivate	0	0	0	0	0	2	6	Intervention measure
4227705531	42	277	3531	0	video	Motivate	0	0	0	0	0	2	6	Intervention measure
4227705534	42	277	3534	0	video	Motivate	1	56	0	0	0	2	6	Intervention measure
4227705510	42	277	3510	0	video	Voorstel	1	29	0	0	0	0	6	Intervention measure
4227705511	42	277	3511	0	video	Voorstel	0	0	0	0	0	0	6	Intervention measure
4227705513	42	277	3513	0	video	Voorstel	0	0	0	0	0	0	6	Intervention measure
4227705516	42	277	3516	0	video	Voorstel	0	0	0	0	0	0	6	Intervention measure
4227705517	42	277	3517	0	video	Voorstel	1	29	0	0	0	0	6	Intervention measure
4227705520	42	277	3520	0	video	Voorstel	2	31	0	0	0	0	6	Intervention measure
4227705521	42	277	3521	0	video	Voorstel	0	0	0	0	0	0	6	Intervention measure
4227705524	42	277	3524	0	video	Voorstel	1	29	0	0	0	0	6	Intervention measure
4227705525	42	277	3525	0	video	Voorstel	0	0	0	0	0	0	6	Intervention measure
4227705526	42	277	3526	0	video	Voorstel	1	25	0	0	0	0	6	Intervention measure
4227705527	42	277	3527	0	video	Voorstel	0	0	0	0	0	0	6	Intervention measure
4227705531	42	277	3531	0	video	Voorstel	0	0	0	0	0	0	6	Intervention measure
4227705534	42	277	3534	0	video	Voorstel	1	29	0	0	0	0	6	Intervention measure
4227705510	42	277	3510	0	video	YourMovez	0	0	0	0	0	1	6	Intervention measure
4227705511	42	277	3511	0	video	YourMovez	0	0	0	0	0	1	6	Intervention measure
4227705513	42	277	3513	0	video	YourMovez	0	0	0	0	0	1	6	Intervention measure
4227705516	42	277	3516	0	video	YourMovez	0	0	0	0	0	1	6	Intervention measure
4227705517	42	277	3517	0	video	YourMovez	0	0	0	0	0	1	6	Intervention measure
4227705520	42	277	3520	0	video	YourMovez	1	56	0	0	0	1	6	Intervention measure
4227705521	42	277	3521	0	video	YourMovez	0	0	0	0	0	1	6	Intervention measure
4227705524	42	277	3524	0	video	YourMovez	0	0	0	0	0	1	6	Intervention measure
4227705525	42	277	3525	0	video	YourMovez	0	0	0	0	0	1	6	Intervention measure
4227705526	42	277	3526	0	video	YourMovez	0	0	0	0	0	1	6	Intervention measure
4227705527	42	277	3527	0	video	YourMovez	0	0	0	0	0	1	6	Intervention measure
4227705531	42	277	3531	0	video	YourMovez	0	0	0	0	0	1	6	Intervention measure
4227705534	42	277	3534	0	video	YourMovez	2	35	0	0	0	1	6	Intervention measure
5629605863	56	296	3863	0	video	BoysVsGirls	0	0	0	0	0	4	6	Intervention measure
5629605864	56	296	3864	0	video	BoysVsGirls	0	0	0	0	0	4	6	Intervention measure
5629605865	56	296	3865	0	video	BoysVsGirls	0	0	0	0	0	4	6	Intervention measure
5629605867	56	296	3867	0	video	BoysVsGirls	0	0	0	0	0	4	6	Intervention measure
5629605868	56	296	3868	0	video	BoysVsGirls	7	117	0	0	0	4	6	Intervention measure
5629605869	56	296	3869	0	video	BoysVsGirls	0	0	0	0	0	4	6	Intervention measure
5629605871	56	296	3871	0	video	BoysVsGirls	0	0	0	0	0	4	6	Intervention measure
5629605872	56	296	3872	0	video	BoysVsGirls	0	0	0	0	0	4	6	Intervention measure
5629605874	56	296	3874	0	video	BoysVsGirls	0	0	0	0	0	4	6	Intervention measure
5629605875	56	296	3875	0	video	BoysVsGirls	0	0	0	0	0	4	6	Intervention measure
5629605877	56	296	3877	0	video	BoysVsGirls	0	0	0	0	0	4	6	Intervention measure
5629605878	56	296	3878	0	video	BoysVsGirls	1	33	0	0	1	4	6	Intervention measure
5629605879	56	296	3879	0	video	BoysVsGirls	1	33	0	0	0	4	6	Intervention measure
5629605880	56	296	3880	0	video	BoysVsGirls	0	0	0	0	0	4	6	Intervention measure
5629605882	56	296	3882	0	video	BoysVsGirls	1	33	0	0	0	4	6	Intervention measure
5629605885	56	296	3885	0	video	BoysVsGirls	1	33	0	0	0	4	6	Intervention measure
5629605886	56	296	3886	0	video	BoysVsGirls	1	33	0	0	0	4	6	Intervention measure
5629605887	56	296	3887	0	video	BoysVsGirls	0	0	0	0	0	4	6	Intervention measure
5629605888	56	296	3888	0	video	BoysVsGirls	0	0	0	0	0	4	6	Intervention measure
5629605863	56	296	3863	0	video	Challange	0	0	0	0	0	3	6	Intervention measure
5629605864	56	296	3864	0	video	Challange	0	0	0	0	0	3	6	Intervention measure
5629605865	56	296	3865	0	video	Challange	0	0	0	0	0	3	6	Intervention measure
5629605867	56	296	3867	0	video	Challange	3	129	0	0	1	3	6	Intervention measure
5629605868	56	296	3868	0	video	Challange	5	95	0	0	3	3	6	Intervention measure
5629605869	56	296	3869	0	video	Challange	0	0	0	0	0	3	6	Intervention measure
5629605871	56	296	3871	0	video	Challange	0	0	0	0	0	3	6	Intervention measure
5629605872	56	296	3872	0	video	Challange	0	0	0	0	0	3	6	Intervention measure
5629605874	56	296	3874	0	video	Challange	0	0	0	0	0	3	6	Intervention measure
5629605875	56	296	3875	0	video	Challange	0	0	0	0	0	3	6	Intervention measure
5629605877	56	296	3877	0	video	Challange	0	0	0	0	0	3	6	Intervention measure
5629605878	56	296	3878	0	video	Challange	1	43	0	0	0	3	6	Intervention measure
5629605879	56	296	3879	0	video	Challange	0	0	0	0	0	3	6	Intervention measure
5629605880	56	296	3880	0	video	Challange	0	0	0	0	0	3	6	Intervention measure
5629605882	56	296	3882	0	video	Challange	1	43	0	0	0	3	6	Intervention measure
5629605885	56	296	3885	0	video	Challange	1	43	0	0	0	3	6	Intervention measure
5629605886	56	296	3886	0	video	Challange	0	0	0	0	0	3	6	Intervention measure
5629605887	56	296	3887	0	video	Challange	0	0	0	0	0	3	6	Intervention measure
5629605888	56	296	3888	0	video	Challange	0	0	0	0	0	3	6	Intervention measure
5629605863	56	296	3863	0	video	CouchPotato	0	0	0	0	0	5	6	Intervention measure
5629605864	56	296	3864	0	video	CouchPotato	0	0	0	0	0	5	6	Intervention measure
5629605865	56	296	3865	0	video	CouchPotato	0	0	0	0	0	5	6	Intervention measure
5629605867	56	296	3867	0	video	CouchPotato	0	0	0	0	0	5	6	Intervention measure
5629605868	56	296	3868	0	video	CouchPotato	3	74	0	0	1	5	6	Intervention measure
5629605869	56	296	3869	0	video	CouchPotato	0	0	0	0	0	5	6	Intervention measure
5629605871	56	296	3871	0	video	CouchPotato	0	0	0	0	0	5	6	Intervention measure
5629605872	56	296	3872	0	video	CouchPotato	0	0	0	0	0	5	6	Intervention measure
5629605874	56	296	3874	0	video	CouchPotato	0	0	0	0	0	5	6	Intervention measure
5629605875	56	296	3875	0	video	CouchPotato	0	0	0	0	0	5	6	Intervention measure
5629605877	56	296	3877	0	video	CouchPotato	0	0	0	0	0	5	6	Intervention measure
5629605878	56	296	3878	0	video	CouchPotato	3	42	0	0	0	5	6	Intervention measure
5629605879	56	296	3879	0	video	CouchPotato	0	0	0	0	0	5	6	Intervention measure
5629605880	56	296	3880	0	video	CouchPotato	0	0	0	0	0	5	6	Intervention measure
5629605882	56	296	3882	0	video	CouchPotato	3	39	0	0	0	5	6	Intervention measure
5629605885	56	296	3885	0	video	CouchPotato	0	0	0	0	0	5	6	Intervention measure
5629605886	56	296	3886	0	video	CouchPotato	0	0	0	0	0	5	6	Intervention measure
5629605887	56	296	3887	0	video	CouchPotato	0	0	0	0	0	5	6	Intervention measure
5629605888	56	296	3888	0	video	CouchPotato	0	0	0	0	0	5	6	Intervention measure
5629605863	56	296	3863	0	video	Motivate	0	0	0	0	0	2	6	Intervention measure
5629605864	56	296	3864	0	video	Motivate	0	0	0	0	0	2	6	Intervention measure
5629605865	56	296	3865	0	video	Motivate	0	0	0	0	0	2	6	Intervention measure
5629605867	56	296	3867	0	video	Motivate	3	155	0	0	0	2	6	Intervention measure
5629605868	56	296	3868	0	video	Motivate	5	207	0	0	1	2	6	Intervention measure
5629605869	56	296	3869	0	video	Motivate	0	0	0	0	0	2	6	Intervention measure
5629605871	56	296	3871	0	video	Motivate	0	0	0	0	0	2	6	Intervention measure
5629605872	56	296	3872	0	video	Motivate	0	0	0	0	0	2	6	Intervention measure
5629605874	56	296	3874	0	video	Motivate	0	0	0	0	0	2	6	Intervention measure
5629605875	56	296	3875	0	video	Motivate	0	0	0	0	0	2	6	Intervention measure
5629605877	56	296	3877	0	video	Motivate	0	0	0	0	0	2	6	Intervention measure
5629605878	56	296	3878	0	video	Motivate	5	216	0	0	1	2	6	Intervention measure
5629605879	56	296	3879	0	video	Motivate	0	0	0	0	0	2	6	Intervention measure
5629605880	56	296	3880	0	video	Motivate	0	0	0	0	0	2	6	Intervention measure
5629605882	56	296	3882	0	video	Motivate	1	52	0	0	0	2	6	Intervention measure
5629605885	56	296	3885	0	video	Motivate	4	208	0	0	0	2	6	Intervention measure
5629605886	56	296	3886	0	video	Motivate	0	0	0	0	0	2	6	Intervention measure
5629605887	56	296	3887	0	video	Motivate	3	118	0	0	0	2	6	Intervention measure
5629605888	56	296	3888	0	video	Motivate	0	0	0	0	0	2	6	Intervention measure
5629605863	56	296	3863	0	video	Voorstel	5	109	0	0	0	0	6	Intervention measure
5629605864	56	296	3864	0	video	Voorstel	4	101	0	0	0	0	6	Intervention measure
5629605865	56	296	3865	0	video	Voorstel	1	5	0	0	0	0	6	Intervention measure
5629605867	56	296	3867	0	video	Voorstel	2	62	0	0	0	0	6	Intervention measure
5629605868	56	296	3868	0	video	Voorstel	5	96	0	0	0	0	6	Intervention measure
5629605869	56	296	3869	0	video	Voorstel	0	0	0	0	0	0	6	Intervention measure
5629605871	56	296	3871	0	video	Voorstel	1	31	0	0	0	0	6	Intervention measure
5629605872	56	296	3872	0	video	Voorstel	1	31	0	0	0	0	6	Intervention measure
5629605874	56	296	3874	0	video	Voorstel	0	0	0	0	0	0	6	Intervention measure
5629605875	56	296	3875	0	video	Voorstel	1	31	0	0	0	0	6	Intervention measure
5629605877	56	296	3877	0	video	Voorstel	0	0	0	0	0	0	6	Intervention measure
5629605878	56	296	3878	0	video	Voorstel	7	131	0	0	2	0	6	Intervention measure
5629605879	56	296	3879	0	video	Voorstel	0	0	0	0	0	0	6	Intervention measure
5629605880	56	296	3880	0	video	Voorstel	0	0	0	0	0	0	6	Intervention measure
5629605882	56	296	3882	0	video	Voorstel	4	124	0	0	0	0	6	Intervention measure
5629605885	56	296	3885	0	video	Voorstel	3	51	0	0	0	0	6	Intervention measure
5629605886	56	296	3886	0	video	Voorstel	1	7	0	0	0	0	6	Intervention measure
5629605887	56	296	3887	0	video	Voorstel	0	0	0	0	0	0	6	Intervention measure
5629605888	56	296	3888	0	video	Voorstel	0	0	0	0	0	0	6	Intervention measure
5629605863	56	296	3863	0	video	YourMovez	2	49	0	0	0	1	6	Intervention measure
5629605864	56	296	3864	0	video	YourMovez	1	30	0	0	0	1	6	Intervention measure
5629605865	56	296	3865	0	video	YourMovez	0	0	0	0	0	1	6	Intervention measure
5629605867	56	296	3867	0	video	YourMovez	1	30	0	0	0	1	6	Intervention measure
5629605868	56	296	3868	0	video	YourMovez	11	222	0	0	20	1	6	Intervention measure
5629605869	56	296	3869	0	video	YourMovez	0	0	0	0	0	1	6	Intervention measure
5629605871	56	296	3871	0	video	YourMovez	0	0	0	0	0	1	6	Intervention measure
5629605872	56	296	3872	0	video	YourMovez	1	30	0	0	0	1	6	Intervention measure
5629605874	56	296	3874	0	video	YourMovez	0	0	0	0	0	1	6	Intervention measure
5629605875	56	296	3875	0	video	YourMovez	0	0	0	0	0	1	6	Intervention measure
5629605877	56	296	3877	0	video	YourMovez	0	0	0	0	0	1	6	Intervention measure
5629605878	56	296	3878	0	video	YourMovez	5	150	0	0	1	1	6	Intervention measure
5629605879	56	296	3879	0	video	YourMovez	0	0	0	0	0	1	6	Intervention measure
5629605880	56	296	3880	0	video	YourMovez	0	0	0	0	0	1	6	Intervention measure
5629605882	56	296	3882	0	video	YourMovez	3	74	0	0	0	1	6	Intervention measure
5629605885	56	296	3885	0	video	YourMovez	2	60	0	0	0	1	6	Intervention measure
5629605886	56	296	3886	0	video	YourMovez	1	25	0	0	0	1	6	Intervention measure
5629605887	56	296	3887	0	video	YourMovez	1	30	0	0	0	1	6	Intervention measure
5629605888	56	296	3888	0	video	YourMovez	0	0	0	0	0	1	6	Intervention measure
5629705890	56	297	3890	5	video	BoysVsGirls	3	99	0	0	0	4	6	Intervention measure
5629705891	56	297	3891	0	video	BoysVsGirls	0	0	0	0	0	4	6	Intervention measure
5629705892	56	297	3892	5	video	BoysVsGirls	0	0	0	0	0	4	6	Intervention measure
5629705893	56	297	3893	0	video	BoysVsGirls	0	0	0	0	0	4	6	Intervention measure
5629705894	56	297	3894	0	video	BoysVsGirls	2	58	0	0	0	4	6	Intervention measure
5629705896	56	297	3896	5	video	BoysVsGirls	0	0	0	0	0	4	6	Intervention measure
5629705897	56	297	3897	0	video	BoysVsGirls	0	0	0	0	0	4	6	Intervention measure
5629705898	56	297	3898	0	video	BoysVsGirls	1	33	0	0	0	4	6	Intervention measure
5629705901	56	297	3901	0	video	BoysVsGirls	4	67	0	0	0	4	6	Intervention measure
5629705902	56	297	3902	5	video	BoysVsGirls	0	0	0	0	0	4	6	Intervention measure
5629705903	56	297	3903	5	video	BoysVsGirls	0	0	0	0	0	4	6	Intervention measure
5629705905	56	297	3905	0	video	BoysVsGirls	0	0	0	0	0	4	6	Intervention measure
5629705906	56	297	3906	0	video	BoysVsGirls	0	0	0	0	0	4	6	Intervention measure
5629705907	56	297	3907	0	video	BoysVsGirls	3	99	0	0	0	4	6	Intervention measure
5629705909	56	297	3909	5	video	BoysVsGirls	1	33	0	0	0	4	6	Intervention measure
5629705911	56	297	3911	0	video	BoysVsGirls	4	69	0	0	0	4	6	Intervention measure
5629705913	56	297	3913	5	video	BoysVsGirls	1	33	0	0	0	4	6	Intervention measure
5629705914	56	297	3914	0	video	BoysVsGirls	0	0	0	0	0	4	6	Intervention measure
5629705915	56	297	3915	0	video	BoysVsGirls	0	0	0	0	0	4	6	Intervention measure
5629705916	56	297	3916	0	video	BoysVsGirls	0	0	0	0	0	4	6	Intervention measure
5629705918	56	297	3918	0	video	BoysVsGirls	0	0	0	0	0	4	6	Intervention measure
5629705919	56	297	3919	0	video	BoysVsGirls	0	0	0	0	0	4	6	Intervention measure
5629705920	56	297	3920	0	video	BoysVsGirls	0	0	0	0	0	4	6	Intervention measure
5629705921	56	297	3921	0	video	BoysVsGirls	0	0	0	0	0	4	6	Intervention measure
5629705922	56	297	3922	0	video	BoysVsGirls	0	0	0	0	0	4	6	Intervention measure
5629705890	56	297	3890	5	video	Challange	0	0	0	0	0	3	6	Intervention measure
5629705891	56	297	3891	0	video	Challange	0	0	0	0	0	3	6	Intervention measure
5629705892	56	297	3892	5	video	Challange	0	0	0	0	0	3	6	Intervention measure
5629705893	56	297	3893	0	video	Challange	0	0	0	0	0	3	6	Intervention measure
5629705894	56	297	3894	0	video	Challange	0	0	0	0	0	3	6	Intervention measure
5629705896	56	297	3896	5	video	Challange	0	0	0	0	0	3	6	Intervention measure
5629705897	56	297	3897	0	video	Challange	0	0	0	0	0	3	6	Intervention measure
5629705898	56	297	3898	0	video	Challange	2	51	0	0	0	3	6	Intervention measure
5629705901	56	297	3901	0	video	Challange	3	87	1	0	1	3	6	Intervention measure
5629705902	56	297	3902	5	video	Challange	0	0	0	0	0	3	6	Intervention measure
5629705903	56	297	3903	5	video	Challange	0	0	0	0	0	3	6	Intervention measure
5629705905	56	297	3905	0	video	Challange	0	0	0	0	0	3	6	Intervention measure
5629705906	56	297	3906	0	video	Challange	0	0	0	0	0	3	6	Intervention measure
5629705907	56	297	3907	0	video	Challange	3	129	0	0	0	3	6	Intervention measure
5629705909	56	297	3909	5	video	Challange	0	0	0	0	0	3	6	Intervention measure
5629705911	56	297	3911	0	video	Challange	2	86	0	0	0	3	6	Intervention measure
5629705913	56	297	3913	5	video	Challange	3	89	0	0	0	3	6	Intervention measure
5629705914	56	297	3914	0	video	Challange	0	0	0	0	0	3	6	Intervention measure
5629705915	56	297	3915	0	video	Challange	0	0	0	0	0	3	6	Intervention measure
5629705916	56	297	3916	0	video	Challange	0	0	0	0	0	3	6	Intervention measure
5629705918	56	297	3918	0	video	Challange	0	0	0	0	0	3	6	Intervention measure
5629705919	56	297	3919	0	video	Challange	0	0	0	0	0	3	6	Intervention measure
5629705920	56	297	3920	0	video	Challange	0	0	0	0	0	3	6	Intervention measure
5629705921	56	297	3921	0	video	Challange	0	0	0	0	0	3	6	Intervention measure
5629705922	56	297	3922	0	video	Challange	0	0	0	0	0	3	6	Intervention measure
5629705890	56	297	3890	5	video	CouchPotato	3	111	0	0	0	5	6	Intervention measure
5629705891	56	297	3891	0	video	CouchPotato	0	0	0	0	0	5	6	Intervention measure
5629705892	56	297	3892	5	video	CouchPotato	0	0	0	0	0	5	6	Intervention measure
5629705893	56	297	3893	0	video	CouchPotato	0	0	0	0	0	5	6	Intervention measure
5629705894	56	297	3894	0	video	CouchPotato	0	0	0	0	0	5	6	Intervention measure
5629705896	56	297	3896	5	video	CouchPotato	0	0	0	0	0	5	6	Intervention measure
5629705897	56	297	3897	0	video	CouchPotato	0	0	0	0	0	5	6	Intervention measure
5629705898	56	297	3898	0	video	CouchPotato	0	0	0	0	0	5	6	Intervention measure
5629705901	56	297	3901	0	video	CouchPotato	3	41	0	0	0	5	6	Intervention measure
5629705902	56	297	3902	5	video	CouchPotato	0	0	0	0	0	5	6	Intervention measure
5629705903	56	297	3903	5	video	CouchPotato	0	0	0	0	0	5	6	Intervention measure
5629705905	56	297	3905	0	video	CouchPotato	0	0	0	0	0	5	6	Intervention measure
5629705906	56	297	3906	0	video	CouchPotato	0	0	0	0	0	5	6	Intervention measure
5629705907	56	297	3907	0	video	CouchPotato	3	111	0	0	0	5	6	Intervention measure
5629705909	56	297	3909	5	video	CouchPotato	1	35	0	0	0	5	6	Intervention measure
5629705911	56	297	3911	0	video	CouchPotato	1	37	0	0	0	5	6	Intervention measure
5629705913	56	297	3913	5	video	CouchPotato	1	37	0	0	0	5	6	Intervention measure
5629705914	56	297	3914	0	video	CouchPotato	0	0	0	0	0	5	6	Intervention measure
5629705915	56	297	3915	0	video	CouchPotato	0	0	0	0	0	5	6	Intervention measure
5629705916	56	297	3916	0	video	CouchPotato	0	0	0	0	0	5	6	Intervention measure
5629705918	56	297	3918	0	video	CouchPotato	0	0	0	0	0	5	6	Intervention measure
5629705919	56	297	3919	0	video	CouchPotato	0	0	0	0	0	5	6	Intervention measure
5629705920	56	297	3920	0	video	CouchPotato	0	0	0	0	0	5	6	Intervention measure
5629705921	56	297	3921	0	video	CouchPotato	0	0	0	0	0	5	6	Intervention measure
5629705922	56	297	3922	0	video	CouchPotato	0	0	0	0	0	5	6	Intervention measure
5629705890	56	297	3890	5	video	Motivate	3	119	0	0	0	2	6	Intervention measure
5629705891	56	297	3891	0	video	Motivate	0	0	0	0	0	2	6	Intervention measure
5629705892	56	297	3892	5	video	Motivate	0	0	0	0	0	2	6	Intervention measure
5629705893	56	297	3893	0	video	Motivate	0	0	0	0	0	2	6	Intervention measure
5629705894	56	297	3894	0	video	Motivate	0	0	0	0	0	2	6	Intervention measure
5629705896	56	297	3896	5	video	Motivate	0	0	0	0	0	2	6	Intervention measure
5629705897	56	297	3897	0	video	Motivate	0	0	0	0	0	2	6	Intervention measure
5629705898	56	297	3898	0	video	Motivate	3	156	0	0	0	2	6	Intervention measure
5629705901	56	297	3901	0	video	Motivate	3	105	0	0	0	2	6	Intervention measure
5629705902	56	297	3902	5	video	Motivate	0	0	0	0	0	2	6	Intervention measure
5629705903	56	297	3903	5	video	Motivate	0	0	0	0	0	2	6	Intervention measure
5629705905	56	297	3905	0	video	Motivate	1	52	0	0	0	2	6	Intervention measure
5629705906	56	297	3906	0	video	Motivate	0	0	0	0	0	2	6	Intervention measure
5629705907	56	297	3907	0	video	Motivate	2	104	0	0	0	2	6	Intervention measure
5629705909	56	297	3909	5	video	Motivate	1	52	0	0	0	2	6	Intervention measure
5629705911	56	297	3911	0	video	Motivate	2	55	0	0	0	2	6	Intervention measure
5629705913	56	297	3913	5	video	Motivate	1	52	0	0	0	2	6	Intervention measure
5629705914	56	297	3914	0	video	Motivate	0	0	0	0	0	2	6	Intervention measure
5629705915	56	297	3915	0	video	Motivate	1	52	0	0	0	2	6	Intervention measure
5629705916	56	297	3916	0	video	Motivate	0	0	0	0	0	2	6	Intervention measure
5629705918	56	297	3918	0	video	Motivate	0	0	0	0	0	2	6	Intervention measure
5629705919	56	297	3919	0	video	Motivate	0	0	0	0	0	2	6	Intervention measure
5629705920	56	297	3920	0	video	Motivate	0	0	0	0	0	2	6	Intervention measure
5629705921	56	297	3921	0	video	Motivate	0	0	0	0	0	2	6	Intervention measure
5629705922	56	297	3922	0	video	Motivate	0	0	0	0	0	2	6	Intervention measure
5629705890	56	297	3890	5	video	Voorstel	2	41	0	0	0	0	6	Intervention measure
5629705891	56	297	3891	0	video	Voorstel	2	32	0	0	0	0	6	Intervention measure
5629705892	56	297	3892	5	video	Voorstel	1	31	0	0	0	0	6	Intervention measure
5629705893	56	297	3893	0	video	Voorstel	0	0	0	0	0	0	6	Intervention measure
5629705894	56	297	3894	0	video	Voorstel	6	165	0	0	0	0	6	Intervention measure
5629705896	56	297	3896	5	video	Voorstel	0	0	0	0	0	0	6	Intervention measure
5629705897	56	297	3897	0	video	Voorstel	0	0	0	0	0	0	6	Intervention measure
5629705898	56	297	3898	0	video	Voorstel	1	31	0	0	0	0	6	Intervention measure
5629705901	56	297	3901	0	video	Voorstel	6	99	2	0	1	0	6	Intervention measure
5629705902	56	297	3902	5	video	Voorstel	2	33	0	0	0	0	6	Intervention measure
5629705903	56	297	3903	5	video	Voorstel	3	93	1	0	0	0	6	Intervention measure
5629705905	56	297	3905	0	video	Voorstel	1	31	0	0	0	0	6	Intervention measure
5629705906	56	297	3906	0	video	Voorstel	1	31	0	0	0	0	6	Intervention measure
5629705907	56	297	3907	0	video	Voorstel	2	62	0	0	1	0	6	Intervention measure
5629705909	56	297	3909	5	video	Voorstel	0	0	0	0	0	0	6	Intervention measure
5629705911	56	297	3911	0	video	Voorstel	2	41	0	0	0	0	6	Intervention measure
5629705913	56	297	3913	5	video	Voorstel	3	69	0	0	0	0	6	Intervention measure
5629705914	56	297	3914	0	video	Voorstel	1	31	0	0	0	0	6	Intervention measure
5629705915	56	297	3915	0	video	Voorstel	3	79	0	0	0	0	6	Intervention measure
5629705916	56	297	3916	0	video	Voorstel	0	0	0	0	0	0	6	Intervention measure
5629705918	56	297	3918	0	video	Voorstel	0	0	0	0	0	0	6	Intervention measure
5629705919	56	297	3919	0	video	Voorstel	0	0	0	0	0	0	6	Intervention measure
5629705920	56	297	3920	0	video	Voorstel	0	0	0	0	0	0	6	Intervention measure
5629705921	56	297	3921	0	video	Voorstel	0	0	0	0	0	0	6	Intervention measure
5629705922	56	297	3922	0	video	Voorstel	0	0	0	0	0	0	6	Intervention measure
5629705890	56	297	3890	5	video	YourMovez	2	60	0	0	0	1	6	Intervention measure
5629705891	56	297	3891	0	video	YourMovez	1	10	0	0	0	1	6	Intervention measure
5629705892	56	297	3892	5	video	YourMovez	0	0	0	0	1	1	6	Intervention measure
5629705893	56	297	3893	0	video	YourMovez	0	0	0	0	0	1	6	Intervention measure
5629705894	56	297	3894	0	video	YourMovez	4	78	0	0	0	1	6	Intervention measure
5629705896	56	297	3896	5	video	YourMovez	0	0	0	0	0	1	6	Intervention measure
5629705897	56	297	3897	0	video	YourMovez	0	0	0	0	0	1	6	Intervention measure
5629705898	56	297	3898	0	video	YourMovez	4	96	0	0	0	1	6	Intervention measure
5629705901	56	297	3901	0	video	YourMovez	5	126	2	0	0	1	6	Intervention measure
5629705902	56	297	3902	5	video	YourMovez	0	0	0	0	0	1	6	Intervention measure
5629705903	56	297	3903	5	video	YourMovez	0	0	0	0	0	1	6	Intervention measure
5629705905	56	297	3905	0	video	YourMovez	3	41	0	0	1	1	6	Intervention measure
5629705906	56	297	3906	0	video	YourMovez	1	30	0	0	0	1	6	Intervention measure
5629705907	56	297	3907	0	video	YourMovez	2	60	0	0	0	1	6	Intervention measure
5629705909	56	297	3909	5	video	YourMovez	1	30	0	0	0	1	6	Intervention measure
5629705911	56	297	3911	0	video	YourMovez	5	86	0	0	0	1	6	Intervention measure
5629705913	56	297	3913	5	video	YourMovez	2	43	1	0	0	1	6	Intervention measure
5629705914	56	297	3914	0	video	YourMovez	2	56	0	0	0	1	6	Intervention measure
5629705915	56	297	3915	0	video	YourMovez	4	84	0	0	0	1	6	Intervention measure
5629705916	56	297	3916	0	video	YourMovez	0	0	0	0	0	1	6	Intervention measure
5629705918	56	297	3918	0	video	YourMovez	0	0	0	0	0	1	6	Intervention measure
5629705919	56	297	3919	0	video	YourMovez	0	0	0	0	0	1	6	Intervention measure
5629705920	56	297	3920	0	video	YourMovez	0	0	0	0	0	1	6	Intervention measure
5629705921	56	297	3921	0	video	YourMovez	0	0	0	0	0	1	6	Intervention measure
5629705922	56	297	3922	0	video	YourMovez	1	30	0	0	0	1	6	Intervention measure
3410302337	34	103	337	7	video	BoysVsGirls	0	0	0	0	0	4	6	Intervention measure
3410302338	34	103	338	0	video	BoysVsGirls	0	0	0	0	0	4	6	Intervention measure
3410302339	34	103	339	0	video	BoysVsGirls	0	0	0	0	0	4	6	Intervention measure
3410302340	34	103	340	0	video	BoysVsGirls	0	0	0	0	0	4	6	Intervention measure
3410302341	34	103	341	0	video	BoysVsGirls	0	0	0	0	0	4	6	Intervention measure
3410302342	34	103	342	0	video	BoysVsGirls	1	112	0	0	0	4	6	Intervention measure
3410302343	34	103	343	0	video	BoysVsGirls	0	0	0	0	0	4	6	Intervention measure
3410302344	34	103	344	7	video	BoysVsGirls	2	222	0	0	0	4	6	Intervention measure
3410302345	34	103	345	7	video	BoysVsGirls	0	0	0	0	0	4	6	Intervention measure
3410302346	34	103	346	0	video	BoysVsGirls	0	0	0	0	0	4	6	Intervention measure
3410302347	34	103	347	0	video	BoysVsGirls	0	0	0	0	0	4	6	Intervention measure
3410302348	34	103	348	0	video	BoysVsGirls	0	0	0	0	0	4	6	Intervention measure
3410302350	34	103	350	0	video	BoysVsGirls	0	0	0	0	0	4	6	Intervention measure
3410302351	34	103	351	0	video	BoysVsGirls	0	0	0	0	0	4	6	Intervention measure
3410302352	34	103	352	0	video	BoysVsGirls	0	0	0	0	0	4	6	Intervention measure
3410304875	34	103	2875	3	video	BoysVsGirls	0	0	0	0	0	4	6	Intervention measure
3410304929	34	103	2929	0	video	BoysVsGirls	4	447	0	0	0	4	6	Intervention measure
3410302337	34	103	337	7	video	Challange	0	0	0	0	0	3	6	Intervention measure
3410302338	34	103	338	0	video	Challange	0	0	0	0	0	3	6	Intervention measure
3410302339	34	103	339	0	video	Challange	0	0	0	0	0	3	6	Intervention measure
3410302340	34	103	340	0	video	Challange	0	0	0	0	0	3	6	Intervention measure
3410302341	34	103	341	0	video	Challange	0	0	0	0	0	3	6	Intervention measure
3410302342	34	103	342	0	video	Challange	2	54	0	0	1	3	6	Intervention measure
3410302343	34	103	343	0	video	Challange	0	0	0	0	0	3	6	Intervention measure
3410302344	34	103	344	7	video	Challange	4	80	1	0	0	3	6	Intervention measure
3410302345	34	103	345	7	video	Challange	0	0	0	0	0	3	6	Intervention measure
3410302346	34	103	346	0	video	Challange	0	0	0	0	0	3	6	Intervention measure
3410302347	34	103	347	0	video	Challange	0	0	0	0	0	3	6	Intervention measure
3410302348	34	103	348	0	video	Challange	0	0	0	0	0	3	6	Intervention measure
3410302350	34	103	350	0	video	Challange	0	0	0	0	0	3	6	Intervention measure
3410302351	34	103	351	0	video	Challange	0	0	0	0	0	3	6	Intervention measure
3410302352	34	103	352	0	video	Challange	0	0	0	0	0	3	6	Intervention measure
3410304875	34	103	2875	3	video	Challange	2	50	0	0	0	3	6	Intervention measure
3410304929	34	103	2929	0	video	Challange	7	188	1	0	0	3	6	Intervention measure
3410302337	34	103	337	7	video	CouchPotato	0	0	0	0	0	5	6	Intervention measure
3410302338	34	103	338	0	video	CouchPotato	0	0	0	0	0	5	6	Intervention measure
3410302339	34	103	339	0	video	CouchPotato	0	0	0	0	0	5	6	Intervention measure
3410302340	34	103	340	0	video	CouchPotato	0	0	0	0	0	5	6	Intervention measure
3410302341	34	103	341	0	video	CouchPotato	0	0	0	0	0	5	6	Intervention measure
3410302342	34	103	342	0	video	CouchPotato	1	49	0	0	0	5	6	Intervention measure
3410302343	34	103	343	0	video	CouchPotato	0	0	0	0	0	5	6	Intervention measure
3410302344	34	103	344	7	video	CouchPotato	3	147	0	0	0	5	6	Intervention measure
3410302345	34	103	345	7	video	CouchPotato	0	0	0	0	0	5	6	Intervention measure
3410302346	34	103	346	0	video	CouchPotato	0	0	0	0	0	5	6	Intervention measure
3410302347	34	103	347	0	video	CouchPotato	0	0	0	0	0	5	6	Intervention measure
3410302348	34	103	348	0	video	CouchPotato	0	0	0	0	0	5	6	Intervention measure
3410302350	34	103	350	0	video	CouchPotato	0	0	0	0	0	5	6	Intervention measure
3410302351	34	103	351	0	video	CouchPotato	0	0	0	0	0	5	6	Intervention measure
3410302352	34	103	352	0	video	CouchPotato	0	0	0	0	0	5	6	Intervention measure
3410304875	34	103	2875	3	video	CouchPotato	0	0	0	0	0	5	6	Intervention measure
3410304929	34	103	2929	0	video	CouchPotato	5	195	0	0	1	5	6	Intervention measure
3410302337	34	103	337	7	video	Motivate	0	0	0	0	0	2	6	Intervention measure
3410302338	34	103	338	0	video	Motivate	0	0	0	0	0	2	6	Intervention measure
3410302339	34	103	339	0	video	Motivate	0	0	0	0	0	2	6	Intervention measure
3410302340	34	103	340	0	video	Motivate	0	0	0	0	0	2	6	Intervention measure
3410302341	34	103	341	0	video	Motivate	1	33	0	0	0	2	6	Intervention measure
3410302342	34	103	342	0	video	Motivate	4	132	0	0	0	2	6	Intervention measure
3410302343	34	103	343	0	video	Motivate	1	33	0	0	0	2	6	Intervention measure
3410302344	34	103	344	7	video	Motivate	2	66	0	0	0	2	6	Intervention measure
3410302345	34	103	345	7	video	Motivate	0	0	0	0	0	2	6	Intervention measure
3410302346	34	103	346	0	video	Motivate	1	33	0	0	0	2	6	Intervention measure
3410302347	34	103	347	0	video	Motivate	0	0	0	0	0	2	6	Intervention measure
3410302348	34	103	348	0	video	Motivate	0	0	0	0	0	2	6	Intervention measure
3410302350	34	103	350	0	video	Motivate	0	0	0	0	0	2	6	Intervention measure
3410302351	34	103	351	0	video	Motivate	0	0	0	0	0	2	6	Intervention measure
3410302352	34	103	352	0	video	Motivate	0	0	0	0	0	2	6	Intervention measure
3410304875	34	103	2875	3	video	Motivate	2	66	0	0	1	2	6	Intervention measure
3410304929	34	103	2929	0	video	Motivate	10	301	1	0	1	2	6	Intervention measure
3410302337	34	103	337	7	video	Voorstel	0	0	0	0	0	0	6	Intervention measure
3410302338	34	103	338	0	video	Voorstel	0	0	0	0	0	0	6	Intervention measure
3410302339	34	103	339	0	video	Voorstel	0	0	0	0	0	0	6	Intervention measure
3410302340	34	103	340	0	video	Voorstel	0	0	0	0	0	0	6	Intervention measure
3410302341	34	103	341	0	video	Voorstel	2	40	0	0	0	0	6	Intervention measure
3410302342	34	103	342	0	video	Voorstel	6	120	0	0	1	0	6	Intervention measure
3410302343	34	103	343	0	video	Voorstel	4	80	0	0	0	0	6	Intervention measure
3410302344	34	103	344	7	video	Voorstel	4	80	0	0	0	0	6	Intervention measure
3410302345	34	103	345	7	video	Voorstel	0	0	0	0	0	0	6	Intervention measure
3410302346	34	103	346	0	video	Voorstel	11	217	0	0	0	0	6	Intervention measure
3410302347	34	103	347	0	video	Voorstel	0	0	0	0	0	0	6	Intervention measure
3410302348	34	103	348	0	video	Voorstel	0	0	0	0	0	0	6	Intervention measure
3410302350	34	103	350	0	video	Voorstel	0	0	0	0	0	0	6	Intervention measure
3410302351	34	103	351	0	video	Voorstel	0	0	0	0	0	0	6	Intervention measure
3410302352	34	103	352	0	video	Voorstel	1	20	0	0	0	0	6	Intervention measure
3410304875	34	103	2875	3	video	Voorstel	4	80	1	0	0	0	6	Intervention measure
3410304929	34	103	2929	0	video	Voorstel	13	257	1	0	1	0	6	Intervention measure
3410302337	34	103	337	7	video	YourMovez	0	0	0	0	0	1	6	Intervention measure
3410302338	34	103	338	0	video	YourMovez	0	0	0	0	0	1	6	Intervention measure
3410302339	34	103	339	0	video	YourMovez	0	0	0	0	0	1	6	Intervention measure
3410302340	34	103	340	0	video	YourMovez	0	0	0	0	0	1	6	Intervention measure
3410302341	34	103	341	0	video	YourMovez	1	26	0	0	0	1	6	Intervention measure
3410302342	34	103	342	0	video	YourMovez	5	114	0	0	0	1	6	Intervention measure
3410302343	34	103	343	0	video	YourMovez	4	104	0	0	0	1	6	Intervention measure
3410302344	34	103	344	7	video	YourMovez	4	72	0	0	0	1	6	Intervention measure
3410302345	34	103	345	7	video	YourMovez	0	0	0	0	0	1	6	Intervention measure
3410302346	34	103	346	0	video	YourMovez	3	53	0	0	0	1	6	Intervention measure
3410302347	34	103	347	0	video	YourMovez	0	0	0	0	0	1	6	Intervention measure
3410302348	34	103	348	0	video	YourMovez	0	0	0	0	0	1	6	Intervention measure
3410302350	34	103	350	0	video	YourMovez	0	0	0	0	0	1	6	Intervention measure
3410302351	34	103	351	0	video	YourMovez	0	0	0	0	0	1	6	Intervention measure
3410302352	34	103	352	0	video	YourMovez	4	103	0	0	0	1	6	Intervention measure
3410304875	34	103	2875	3	video	YourMovez	2	51	0	0	0	1	6	Intervention measure
3410304929	34	103	2929	0	video	YourMovez	14	336	0	0	1	1	6	Intervention measure
3425004905	34	250	2905	7	video	YourMovez	15	307	1	0	1	1	6	Intervention measure
3425004906	34	250	2906	7	video	YourMovez	4	104	0	0	0	1	6	Intervention measure
3425004907	34	250	2907	0	video	YourMovez	6	119	0	0	1	1	6	Intervention measure
3425004908	34	250	2908	0	video	YourMovez	2	29	0	0	0	1	6	Intervention measure
3425004909	34	250	2909	0	video	YourMovez	14	301	0	0	0	1	6	Intervention measure
3425004910	34	250	2910	5	video	YourMovez	3	78	0	0	1	1	6	Intervention measure
3425004911	34	250	2911	0	video	YourMovez	7	163	0	0	0	1	6	Intervention measure
3425004913	34	250	2913	0	video	YourMovez	5	130	0	0	0	1	6	Intervention measure
3425006057	34	250	4057	5	video	YourMovez	0	0	0	0	0	1	6	Intervention measure
3425004905	34	250	2905	7	video	Voorstel	21	378	0	0	0	0	6	Intervention measure
3425004906	34	250	2906	7	video	Voorstel	3	60	0	0	0	0	6	Intervention measure
3425004907	34	250	2907	0	video	Voorstel	1	20	0	0	0	0	6	Intervention measure
3425004908	34	250	2908	0	video	Voorstel	7	113	1	0	2	0	6	Intervention measure
3425004909	34	250	2909	0	video	Voorstel	39	739	0	0	0	0	6	Intervention measure
3425004910	34	250	2910	5	video	Voorstel	6	87	0	0	1	0	6	Intervention measure
3425004911	34	250	2911	0	video	Voorstel	19	365	0	0	0	0	6	Intervention measure
3425004913	34	250	2913	0	video	Voorstel	4	80	1	0	0	0	6	Intervention measure
3425006057	34	250	4057	5	video	Voorstel	0	0	0	0	0	0	6	Intervention measure
3425004905	34	250	2905	7	video	Motivate	5	135	1	0	0	2	6	Intervention measure
3425004906	34	250	2906	7	video	Motivate	1	33	0	0	0	2	6	Intervention measure
3425004907	34	250	2907	0	video	Motivate	1	33	0	0	0	2	6	Intervention measure
3425004908	34	250	2908	0	video	Motivate	3	99	0	0	0	2	6	Intervention measure
3425004909	34	250	2909	0	video	Motivate	8	212	0	0	1	2	6	Intervention measure
3425004910	34	250	2910	5	video	Motivate	0	0	0	0	0	2	6	Intervention measure
3425004911	34	250	2911	0	video	Motivate	1	33	0	0	0	2	6	Intervention measure
3425004913	34	250	2913	0	video	Motivate	0	0	0	0	0	2	6	Intervention measure
3425006057	34	250	4057	5	video	Motivate	0	0	0	0	0	2	6	Intervention measure
3425004905	34	250	2905	7	video	CouchPotato	18	769	1	0	1	5	6	Intervention measure
3425004906	34	250	2906	7	video	CouchPotato	0	0	0	0	0	5	6	Intervention measure
3425004907	34	250	2907	0	video	CouchPotato	0	0	0	0	0	5	6	Intervention measure
3425004908	34	250	2908	0	video	CouchPotato	1	49	0	0	0	5	6	Intervention measure
3425004909	34	250	2909	0	video	CouchPotato	14	637	0	0	0	5	6	Intervention measure
3425004910	34	250	2910	5	video	CouchPotato	0	0	0	0	0	5	6	Intervention measure
3425004911	34	250	2911	0	video	CouchPotato	1	49	0	0	0	5	6	Intervention measure
3425004913	34	250	2913	0	video	CouchPotato	0	0	0	0	0	5	6	Intervention measure
3425006057	34	250	4057	5	video	CouchPotato	0	0	0	0	0	5	6	Intervention measure
3425004905	34	250	2905	7	video	Challange	31	556	0	0	0	3	6	Intervention measure
3425004906	34	250	2906	7	video	Challange	1	25	0	0	0	3	6	Intervention measure
3425004907	34	250	2907	0	video	Challange	1	27	0	0	0	3	6	Intervention measure
3425004908	34	250	2908	0	video	Challange	2	48	0	0	0	3	6	Intervention measure
3425004909	34	250	2909	0	video	Challange	14	377	0	0	1	3	6	Intervention measure
3425004910	34	250	2910	5	video	Challange	0	0	0	0	0	3	6	Intervention measure
3425004911	34	250	2911	0	video	Challange	0	0	0	0	0	3	6	Intervention measure
3425004913	34	250	2913	0	video	Challange	0	0	0	0	0	3	6	Intervention measure
3425006057	34	250	4057	5	video	Challange	0	0	0	0	0	3	6	Intervention measure
3425004905	34	250	2905	7	video	BoysVsGirls	20	1409	0	0	0	4	6	Intervention measure
3425004906	34	250	2906	7	video	BoysVsGirls	1	112	0	0	0	4	6	Intervention measure
3425004907	34	250	2907	0	video	BoysVsGirls	0	0	0	0	0	4	6	Intervention measure
3425004908	34	250	2908	0	video	BoysVsGirls	0	0	0	0	0	4	6	Intervention measure
3425004909	34	250	2909	0	video	BoysVsGirls	13	1239	0	0	1	4	6	Intervention measure
3425004910	34	250	2910	5	video	BoysVsGirls	0	0	0	0	0	4	6	Intervention measure
3425004911	34	250	2911	0	video	BoysVsGirls	0	0	0	0	0	4	6	Intervention measure
3425004913	34	250	2913	0	video	BoysVsGirls	0	0	0	0	0	4	6	Intervention measure
3425006057	34	250	4057	5	video	BoysVsGirls	0	0	0	0	0	4	6	Intervention measure
3425104915	34	251	2915	0	video	YourMovez	2	52	0	0	0	1	6	Intervention measure
3425104916	34	251	2916	0	video	YourMovez	0	0	0	0	0	1	6	Intervention measure
3425104917	34	251	2917	5	video	YourMovez	2	52	0	0	0	1	6	Intervention measure
3425104918	34	251	2918	0	video	YourMovez	4	101	1	0	0	1	6	Intervention measure
3425104919	34	251	2919	0	video	YourMovez	1	26	0	0	0	1	6	Intervention measure
3425104920	34	251	2920	0	video	YourMovez	1	26	0	0	0	1	6	Intervention measure
3425104921	34	251	2921	0	video	YourMovez	2	51	0	0	0	1	6	Intervention measure
3425104922	34	251	2922	0	video	YourMovez	6	138	0	0	0	1	6	Intervention measure
3425104923	34	251	2923	0	video	YourMovez	1	25	0	0	0	1	6	Intervention measure
3425104924	34	251	2924	0	video	YourMovez	6	141	0	0	0	1	6	Intervention measure
3425104925	34	251	2925	0	video	YourMovez	1	26	0	0	0	1	6	Intervention measure
3425104926	34	251	2926	7	video	YourMovez	3	67	0	0	1	1	6	Intervention measure
3425104927	34	251	2927	0	video	YourMovez	1	26	0	0	0	1	6	Intervention measure
3425104915	34	251	2915	0	video	Voorstel	5	81	0	0	0	0	6	Intervention measure
3425104916	34	251	2916	0	video	Voorstel	0	0	0	0	0	0	6	Intervention measure
3425104917	34	251	2917	5	video	Voorstel	2	40	0	0	0	0	6	Intervention measure
3425104918	34	251	2918	0	video	Voorstel	5	100	0	0	0	0	6	Intervention measure
3425104919	34	251	2919	0	video	Voorstel	1	20	0	0	0	0	6	Intervention measure
3425104920	34	251	2920	0	video	Voorstel	3	60	0	0	0	0	6	Intervention measure
3425104921	34	251	2921	0	video	Voorstel	3	60	0	0	0	0	6	Intervention measure
3425104922	34	251	2922	0	video	Voorstel	13	156	0	0	0	0	6	Intervention measure
3425104923	34	251	2923	0	video	Voorstel	1	20	0	0	0	0	6	Intervention measure
3425104924	34	251	2924	0	video	Voorstel	20	338	0	0	1	0	6	Intervention measure
3425104925	34	251	2925	0	video	Voorstel	3	43	0	0	0	0	6	Intervention measure
3425104926	34	251	2926	7	video	Voorstel	11	193	0	0	0	0	6	Intervention measure
3425104927	34	251	2927	0	video	Voorstel	2	29	0	0	0	0	6	Intervention measure
3425104915	34	251	2915	0	video	Motivate	1	33	0	0	0	2	6	Intervention measure
3425104916	34	251	2916	0	video	Motivate	0	0	0	0	0	2	6	Intervention measure
3425104917	34	251	2917	5	video	Motivate	0	0	0	0	0	2	6	Intervention measure
3425104918	34	251	2918	0	video	Motivate	2	66	0	0	0	2	6	Intervention measure
3425104919	34	251	2919	0	video	Motivate	1	33	0	0	0	2	6	Intervention measure
3425104920	34	251	2920	0	video	Motivate	0	0	0	0	0	2	6	Intervention measure
3425104921	34	251	2921	0	video	Motivate	3	69	0	0	0	2	6	Intervention measure
3425104922	34	251	2922	0	video	Motivate	5	133	0	0	1	2	6	Intervention measure
3425104923	34	251	2923	0	video	Motivate	1	33	0	0	0	2	6	Intervention measure
3425104924	34	251	2924	0	video	Motivate	5	133	0	0	0	2	6	Intervention measure
3425104925	34	251	2925	0	video	Motivate	1	33	0	0	0	2	6	Intervention measure
3425104926	34	251	2926	7	video	Motivate	3	99	0	0	0	2	6	Intervention measure
3425104927	34	251	2927	0	video	Motivate	1	33	0	0	0	2	6	Intervention measure
3425104915	34	251	2915	0	video	CouchPotato	2	98	0	0	0	5	6	Intervention measure
3425104916	34	251	2916	0	video	CouchPotato	0	0	0	0	0	5	6	Intervention measure
3425104917	34	251	2917	5	video	CouchPotato	0	0	0	0	0	5	6	Intervention measure
3425104918	34	251	2918	0	video	CouchPotato	0	0	0	0	0	5	6	Intervention measure
3425104919	34	251	2919	0	video	CouchPotato	0	0	0	0	0	5	6	Intervention measure
3425104920	34	251	2920	0	video	CouchPotato	0	0	0	0	0	5	6	Intervention measure
3425104921	34	251	2921	0	video	CouchPotato	1	49	0	0	0	5	6	Intervention measure
3425104922	34	251	2922	0	video	CouchPotato	2	23	0	0	0	5	6	Intervention measure
3425104923	34	251	2923	0	video	CouchPotato	0	0	0	0	0	5	6	Intervention measure
3425104924	34	251	2924	0	video	CouchPotato	14	251	0	0	0	5	6	Intervention measure
3425104925	34	251	2925	0	video	CouchPotato	1	49	0	0	0	5	6	Intervention measure
3425104926	34	251	2926	7	video	CouchPotato	4	196	0	0	1	5	6	Intervention measure
3425104927	34	251	2927	0	video	CouchPotato	1	49	0	0	0	5	6	Intervention measure
3425104915	34	251	2915	0	video	Challange	1	27	0	0	0	3	6	Intervention measure
3425104916	34	251	2916	0	video	Challange	0	0	0	0	0	3	6	Intervention measure
3425104917	34	251	2917	5	video	Challange	0	0	0	0	0	3	6	Intervention measure
3425104918	34	251	2918	0	video	Challange	1	27	0	0	0	3	6	Intervention measure
3425104919	34	251	2919	0	video	Challange	1	27	0	0	0	3	6	Intervention measure
3425104920	34	251	2920	0	video	Challange	0	0	0	0	0	3	6	Intervention measure
3425104921	34	251	2921	0	video	Challange	2	49	0	0	0	3	6	Intervention measure
3425104922	34	251	2922	0	video	Challange	3	64	0	0	0	3	6	Intervention measure
3425104923	34	251	2923	0	video	Challange	0	0	0	0	0	3	6	Intervention measure
3425104924	34	251	2924	0	video	Challange	9	179	0	0	0	3	6	Intervention measure
3425104925	34	251	2925	0	video	Challange	1	27	0	0	0	3	6	Intervention measure
3425104926	34	251	2926	7	video	Challange	0	0	0	0	0	3	6	Intervention measure
3425104927	34	251	2927	0	video	Challange	1	26	0	0	0	3	6	Intervention measure
3425104915	34	251	2915	0	video	BoysVsGirls	1	111	0	0	0	4	6	Intervention measure
3425104916	34	251	2916	0	video	BoysVsGirls	0	0	0	0	0	4	6	Intervention measure
3425104917	34	251	2917	5	video	BoysVsGirls	0	0	0	0	0	4	6	Intervention measure
3425104918	34	251	2918	0	video	BoysVsGirls	0	0	0	0	0	4	6	Intervention measure
3425104919	34	251	2919	0	video	BoysVsGirls	1	111	0	0	0	4	6	Intervention measure
3425104920	34	251	2920	0	video	BoysVsGirls	0	0	0	0	0	4	6	Intervention measure
3425104921	34	251	2921	0	video	BoysVsGirls	1	112	0	0	0	4	6	Intervention measure
3425104922	34	251	2922	0	video	BoysVsGirls	1	112	0	0	1	4	6	Intervention measure
3425104923	34	251	2923	0	video	BoysVsGirls	0	0	0	0	0	4	6	Intervention measure
3425104924	34	251	2924	0	video	BoysVsGirls	10	456	0	0	1	4	6	Intervention measure
3425104925	34	251	2925	0	video	BoysVsGirls	1	112	0	0	0	4	6	Intervention measure
3425104926	34	251	2926	7	video	BoysVsGirls	1	81	0	0	0	4	6	Intervention measure
3425104927	34	251	2927	0	video	BoysVsGirls	1	112	0	0	0	4	6	Intervention measure
3912502886	39	125	886	3	video	BoysVsGirls	0	0	0	0	0	4	6	Intervention measure
3912502887	39	125	887	3	video	BoysVsGirls	0	0	0	0	0	4	6	Intervention measure
3912502890	39	125	890	3	video	BoysVsGirls	0	0	0	0	0	4	6	Intervention measure
3912502891	39	125	891	0	video	BoysVsGirls	2	176	0	0	0	4	6	Intervention measure
3912502892	39	125	892	0	video	BoysVsGirls	0	0	0	0	0	4	6	Intervention measure
3912502894	39	125	894	0	video	BoysVsGirls	0	0	0	0	0	4	6	Intervention measure
3912502897	39	125	897	0	video	BoysVsGirls	0	0	0	0	0	4	6	Intervention measure
3912502898	39	125	898	0	video	BoysVsGirls	0	0	0	0	0	4	6	Intervention measure
3912502899	39	125	899	1	video	BoysVsGirls	0	0	0	0	0	4	6	Intervention measure
3912502900	39	125	900	0	video	BoysVsGirls	7	543	0	0	0	4	6	Intervention measure
3912502901	39	125	901	0	video	BoysVsGirls	0	0	0	0	0	4	6	Intervention measure
3912502902	39	125	902	0	video	BoysVsGirls	0	0	0	0	0	4	6	Intervention measure
3912502903	39	125	903	0	video	BoysVsGirls	0	0	0	0	0	4	6	Intervention measure
3912502904	39	125	904	0	video	BoysVsGirls	0	0	0	0	0	4	6	Intervention measure
3912502905	39	125	905	0	video	BoysVsGirls	0	0	0	0	0	4	6	Intervention measure
3912502906	39	125	906	1	video	BoysVsGirls	0	0	0	0	0	4	6	Intervention measure
3912502908	39	125	908	1	video	BoysVsGirls	0	0	0	0	0	4	6	Intervention measure
3912502886	39	125	886	3	video	Challange	0	0	0	0	0	3	6	Intervention measure
3912502887	39	125	887	3	video	Challange	0	0	0	0	0	3	6	Intervention measure
3912502890	39	125	890	3	video	Challange	0	0	0	0	0	3	6	Intervention measure
3912502891	39	125	891	0	video	Challange	5	115	0	0	0	3	6	Intervention measure
3912502892	39	125	892	0	video	Challange	0	0	0	0	0	3	6	Intervention measure
3912502894	39	125	894	0	video	Challange	0	0	0	0	0	3	6	Intervention measure
3912502897	39	125	897	0	video	Challange	0	0	0	0	0	3	6	Intervention measure
3912502898	39	125	898	0	video	Challange	0	0	0	0	0	3	6	Intervention measure
3912502899	39	125	899	1	video	Challange	0	0	0	0	0	3	6	Intervention measure
3912502900	39	125	900	0	video	Challange	2	35	0	0	0	3	6	Intervention measure
3912502901	39	125	901	0	video	Challange	0	0	0	0	0	3	6	Intervention measure
3912502902	39	125	902	0	video	Challange	0	0	0	0	0	3	6	Intervention measure
3912502903	39	125	903	0	video	Challange	0	0	0	0	0	3	6	Intervention measure
3912502904	39	125	904	0	video	Challange	0	0	0	0	0	3	6	Intervention measure
3912502905	39	125	905	0	video	Challange	0	0	0	0	0	3	6	Intervention measure
3912502906	39	125	906	1	video	Challange	0	0	0	0	0	3	6	Intervention measure
3912502908	39	125	908	1	video	Challange	0	0	0	0	0	3	6	Intervention measure
3912502886	39	125	886	3	video	CouchPotato	0	0	0	0	0	5	6	Intervention measure
3912502887	39	125	887	3	video	CouchPotato	0	0	0	0	0	5	6	Intervention measure
3912502890	39	125	890	3	video	CouchPotato	0	0	0	0	0	5	6	Intervention measure
3912502891	39	125	891	0	video	CouchPotato	1	49	0	0	0	5	6	Intervention measure
3912502892	39	125	892	0	video	CouchPotato	0	0	0	0	0	5	6	Intervention measure
3912502894	39	125	894	0	video	CouchPotato	0	0	0	0	0	5	6	Intervention measure
3912502897	39	125	897	0	video	CouchPotato	0	0	0	0	0	5	6	Intervention measure
3912502898	39	125	898	0	video	CouchPotato	0	0	0	0	0	5	6	Intervention measure
3912502899	39	125	899	1	video	CouchPotato	0	0	0	0	0	5	6	Intervention measure
3912502900	39	125	900	0	video	CouchPotato	2	98	0	0	0	5	6	Intervention measure
3912502901	39	125	901	0	video	CouchPotato	0	0	0	0	0	5	6	Intervention measure
3912502902	39	125	902	0	video	CouchPotato	0	0	0	0	0	5	6	Intervention measure
3912502903	39	125	903	0	video	CouchPotato	0	0	0	0	0	5	6	Intervention measure
3912502904	39	125	904	0	video	CouchPotato	0	0	0	0	0	5	6	Intervention measure
3912502905	39	125	905	0	video	CouchPotato	0	0	0	0	0	5	6	Intervention measure
3912502906	39	125	906	1	video	CouchPotato	0	0	0	0	0	5	6	Intervention measure
3912502908	39	125	908	1	video	CouchPotato	0	0	0	0	0	5	6	Intervention measure
3912502886	39	125	886	3	video	Motivate	0	0	0	0	0	2	6	Intervention measure
3912502887	39	125	887	3	video	Motivate	0	0	0	0	0	2	6	Intervention measure
3912502890	39	125	890	3	video	Motivate	0	0	0	0	0	2	6	Intervention measure
3912502891	39	125	891	0	video	Motivate	2	36	0	0	0	2	6	Intervention measure
3912502892	39	125	892	0	video	Motivate	0	0	0	0	0	2	6	Intervention measure
3912502894	39	125	894	0	video	Motivate	0	0	0	0	0	2	6	Intervention measure
3912502897	39	125	897	0	video	Motivate	0	0	0	0	0	2	6	Intervention measure
3912502898	39	125	898	0	video	Motivate	0	0	0	0	0	2	6	Intervention measure
3912502899	39	125	899	1	video	Motivate	0	0	0	0	0	2	6	Intervention measure
3912502900	39	125	900	0	video	Motivate	1	33	0	0	0	2	6	Intervention measure
3912502901	39	125	901	0	video	Motivate	0	0	0	0	0	2	6	Intervention measure
3912502902	39	125	902	0	video	Motivate	0	0	0	0	0	2	6	Intervention measure
3912502903	39	125	903	0	video	Motivate	0	0	0	0	0	2	6	Intervention measure
3912502904	39	125	904	0	video	Motivate	0	0	0	0	0	2	6	Intervention measure
3912502905	39	125	905	0	video	Motivate	0	0	0	0	0	2	6	Intervention measure
3912502906	39	125	906	1	video	Motivate	1	33	0	0	0	2	6	Intervention measure
3912502908	39	125	908	1	video	Motivate	4	52	0	0	0	2	6	Intervention measure
3912502886	39	125	886	3	video	Voorstel	0	0	0	0	0	0	6	Intervention measure
3912502887	39	125	887	3	video	Voorstel	1	20	0	0	0	0	6	Intervention measure
3912502890	39	125	890	3	video	Voorstel	1	20	0	0	0	0	6	Intervention measure
3912502891	39	125	891	0	video	Voorstel	5	100	0	0	0	0	6	Intervention measure
3912502892	39	125	892	0	video	Voorstel	0	0	0	0	0	0	6	Intervention measure
3912502894	39	125	894	0	video	Voorstel	1	20	0	0	0	0	6	Intervention measure
3912502897	39	125	897	0	video	Voorstel	0	0	0	0	0	0	6	Intervention measure
3912502898	39	125	898	0	video	Voorstel	1	20	0	0	0	0	6	Intervention measure
3912502899	39	125	899	1	video	Voorstel	0	0	0	0	0	0	6	Intervention measure
3912502900	39	125	900	0	video	Voorstel	8	109	0	0	0	0	6	Intervention measure
3912502901	39	125	901	0	video	Voorstel	0	0	0	0	0	0	6	Intervention measure
3912502902	39	125	902	0	video	Voorstel	0	0	0	0	0	0	6	Intervention measure
3912502903	39	125	903	0	video	Voorstel	0	0	0	0	0	0	6	Intervention measure
3912502904	39	125	904	0	video	Voorstel	0	0	0	0	0	0	6	Intervention measure
3912502905	39	125	905	0	video	Voorstel	0	0	0	0	0	0	6	Intervention measure
3912502906	39	125	906	1	video	Voorstel	1	20	0	0	0	0	6	Intervention measure
3912502908	39	125	908	1	video	Voorstel	8	133	0	0	1	0	6	Intervention measure
3912502886	39	125	886	3	video	YourMovez	0	0	0	0	0	1	6	Intervention measure
3912502887	39	125	887	3	video	YourMovez	0	0	0	0	0	1	6	Intervention measure
3912502890	39	125	890	3	video	YourMovez	1	26	0	0	0	1	6	Intervention measure
3912502891	39	125	891	0	video	YourMovez	2	27	0	0	0	1	6	Intervention measure
3912502892	39	125	892	0	video	YourMovez	0	0	0	0	0	1	6	Intervention measure
3912502894	39	125	894	0	video	YourMovez	2	27	0	0	0	1	6	Intervention measure
3912502897	39	125	897	0	video	YourMovez	0	0	0	0	0	1	6	Intervention measure
3912502898	39	125	898	0	video	YourMovez	0	0	0	0	0	1	6	Intervention measure
3912502899	39	125	899	1	video	YourMovez	0	0	0	0	0	1	6	Intervention measure
3912502900	39	125	900	0	video	YourMovez	8	108	0	0	0	1	6	Intervention measure
3912502901	39	125	901	0	video	YourMovez	0	0	0	0	0	1	6	Intervention measure
3912502902	39	125	902	0	video	YourMovez	2	40	0	0	0	1	6	Intervention measure
3912502903	39	125	903	0	video	YourMovez	0	0	0	0	0	1	6	Intervention measure
3912502904	39	125	904	0	video	YourMovez	0	0	0	0	0	1	6	Intervention measure
3912502905	39	125	905	0	video	YourMovez	0	0	0	0	0	1	6	Intervention measure
3912502906	39	125	906	1	video	YourMovez	1	26	0	0	0	1	6	Intervention measure
3912502908	39	125	908	1	video	YourMovez	5	85	0	0	0	1	6	Intervention measure
3929005796	39	290	3796	0	video	BoysVsGirls	3	332	0	0	0	4	6	Intervention measure
3929005797	39	290	3797	0	video	BoysVsGirls	0	0	0	0	0	4	6	Intervention measure
3929005799	39	290	3799	0	video	BoysVsGirls	0	0	0	0	0	4	6	Intervention measure
3929005801	39	290	3801	0	video	BoysVsGirls	0	0	0	0	0	4	6	Intervention measure
3929005802	39	290	3802	0	video	BoysVsGirls	1	110	0	0	0	4	6	Intervention measure
3929005803	39	290	3803	0	video	BoysVsGirls	5	560	0	0	0	4	6	Intervention measure
3929005804	39	290	3804	0	video	BoysVsGirls	2	224	0	0	0	4	6	Intervention measure
3929005806	39	290	3806	0	video	BoysVsGirls	0	0	0	0	0	4	6	Intervention measure
3929005807	39	290	3807	5	video	BoysVsGirls	0	0	0	0	0	4	6	Intervention measure
3929005809	39	290	3809	0	video	BoysVsGirls	0	0	0	0	0	4	6	Intervention measure
3929005810	39	290	3810	0	video	BoysVsGirls	0	0	0	0	0	4	6	Intervention measure
3929005811	39	290	3811	0	video	BoysVsGirls	7	349	0	0	0	4	6	Intervention measure
3929005812	39	290	3812	0	video	BoysVsGirls	2	89	0	0	0	4	6	Intervention measure
3929005813	39	290	3813	0	video	BoysVsGirls	0	0	0	0	0	4	6	Intervention measure
3929005796	39	290	3796	0	video	Challange	4	102	0	0	0	3	6	Intervention measure
3929005797	39	290	3797	0	video	Challange	0	0	0	0	0	3	6	Intervention measure
3929005799	39	290	3799	0	video	Challange	0	0	0	0	0	3	6	Intervention measure
3929005801	39	290	3801	0	video	Challange	0	0	0	0	0	3	6	Intervention measure
3929005802	39	290	3802	0	video	Challange	1	27	0	0	0	3	6	Intervention measure
3929005803	39	290	3803	0	video	Challange	18	410	0	0	0	3	6	Intervention measure
3929005804	39	290	3804	0	video	Challange	5	135	0	0	0	3	6	Intervention measure
3929005806	39	290	3806	0	video	Challange	0	0	0	0	0	3	6	Intervention measure
3929005807	39	290	3807	5	video	Challange	0	0	0	0	0	3	6	Intervention measure
3929005809	39	290	3809	0	video	Challange	0	0	0	0	0	3	6	Intervention measure
3929005810	39	290	3810	0	video	Challange	0	0	0	0	1	3	6	Intervention measure
3929005811	39	290	3811	0	video	Challange	7	116	0	0	0	3	6	Intervention measure
3929005812	39	290	3812	0	video	Challange	0	0	0	0	0	3	6	Intervention measure
3929005813	39	290	3813	0	video	Challange	0	0	0	0	0	3	6	Intervention measure
3929005796	39	290	3796	0	video	CouchPotato	3	147	0	0	0	5	6	Intervention measure
3929005797	39	290	3797	0	video	CouchPotato	0	0	0	0	0	5	6	Intervention measure
3929005799	39	290	3799	0	video	CouchPotato	0	0	0	0	0	5	6	Intervention measure
3929005801	39	290	3801	0	video	CouchPotato	0	0	0	0	0	5	6	Intervention measure
3929005802	39	290	3802	0	video	CouchPotato	2	98	0	0	0	5	6	Intervention measure
3929005803	39	290	3803	0	video	CouchPotato	14	621	0	0	1	5	6	Intervention measure
3929005804	39	290	3804	0	video	CouchPotato	9	375	0	1	0	5	6	Intervention measure
3929005806	39	290	3806	0	video	CouchPotato	0	0	0	0	0	5	6	Intervention measure
3929005807	39	290	3807	5	video	CouchPotato	0	0	0	0	0	5	6	Intervention measure
3929005809	39	290	3809	0	video	CouchPotato	0	0	0	0	0	5	6	Intervention measure
3929005810	39	290	3810	0	video	CouchPotato	0	0	0	0	0	5	6	Intervention measure
3929005811	39	290	3811	0	video	CouchPotato	9	333	0	0	0	5	6	Intervention measure
3929005812	39	290	3812	0	video	CouchPotato	0	0	0	0	0	5	6	Intervention measure
3929005813	39	290	3813	0	video	CouchPotato	0	0	0	0	0	5	6	Intervention measure
3929005796	39	290	3796	0	video	Motivate	5	137	0	0	0	2	6	Intervention measure
3929005797	39	290	3797	0	video	Motivate	0	0	0	0	0	2	6	Intervention measure
3929005799	39	290	3799	0	video	Motivate	0	0	0	0	0	2	6	Intervention measure
3929005801	39	290	3801	0	video	Motivate	0	0	0	0	0	2	6	Intervention measure
3929005802	39	290	3802	0	video	Motivate	3	99	0	0	0	2	6	Intervention measure
3929005803	39	290	3803	0	video	Motivate	19	618	0	0	0	2	6	Intervention measure
3929005804	39	290	3804	0	video	Motivate	1	33	0	0	0	2	6	Intervention measure
3929005806	39	290	3806	0	video	Motivate	0	0	0	0	0	2	6	Intervention measure
3929005807	39	290	3807	5	video	Motivate	0	0	0	0	0	2	6	Intervention measure
3929005809	39	290	3809	0	video	Motivate	0	0	0	0	0	2	6	Intervention measure
3929005810	39	290	3810	0	video	Motivate	1	33	0	0	0	2	6	Intervention measure
3929005811	39	290	3811	0	video	Motivate	13	352	0	0	1	2	6	Intervention measure
3929005812	39	290	3812	0	video	Motivate	1	33	0	0	0	2	6	Intervention measure
3929005813	39	290	3813	0	video	Motivate	0	0	0	0	0	2	6	Intervention measure
3929005796	39	290	3796	0	video	Voorstel	12	240	0	0	0	0	6	Intervention measure
3929005797	39	290	3797	0	video	Voorstel	0	0	0	0	0	0	6	Intervention measure
3929005799	39	290	3799	0	video	Voorstel	0	0	0	0	0	0	6	Intervention measure
3929005801	39	290	3801	0	video	Voorstel	3	23	0	0	0	0	6	Intervention measure
3929005802	39	290	3802	0	video	Voorstel	4	79	0	0	0	0	6	Intervention measure
3929005803	39	290	3803	0	video	Voorstel	32	622	0	0	0	0	6	Intervention measure
3929005804	39	290	3804	0	video	Voorstel	6	113	0	0	0	0	6	Intervention measure
3929005806	39	290	3806	0	video	Voorstel	0	0	0	0	0	0	6	Intervention measure
3929005807	39	290	3807	5	video	Voorstel	0	0	0	0	0	0	6	Intervention measure
3929005809	39	290	3809	0	video	Voorstel	0	0	0	0	0	0	6	Intervention measure
3929005810	39	290	3810	0	video	Voorstel	2	21	0	0	1	0	6	Intervention measure
3929005811	39	290	3811	0	video	Voorstel	27	451	0	0	0	0	6	Intervention measure
3929005812	39	290	3812	0	video	Voorstel	3	48	0	0	0	0	6	Intervention measure
3929005813	39	290	3813	0	video	Voorstel	1	20	0	0	0	0	6	Intervention measure
3929005796	39	290	3796	0	video	YourMovez	3	77	0	0	0	1	6	Intervention measure
3929005797	39	290	3797	0	video	YourMovez	0	0	0	0	1	1	6	Intervention measure
3929005799	39	290	3799	0	video	YourMovez	0	0	0	0	0	1	6	Intervention measure
3929005801	39	290	3801	0	video	YourMovez	0	0	0	0	0	1	6	Intervention measure
3929005802	39	290	3802	0	video	YourMovez	7	81	0	0	0	1	6	Intervention measure
3929005803	39	290	3803	0	video	YourMovez	20	520	0	0	0	1	6	Intervention measure
3929005804	39	290	3804	0	video	YourMovez	3	46	0	1	0	1	6	Intervention measure
3929005806	39	290	3806	0	video	YourMovez	0	0	0	0	0	1	6	Intervention measure
3929005807	39	290	3807	5	video	YourMovez	0	0	0	0	0	1	6	Intervention measure
3929005809	39	290	3809	0	video	YourMovez	0	0	0	0	0	1	6	Intervention measure
3929005810	39	290	3810	0	video	YourMovez	1	24	0	0	0	1	6	Intervention measure
3929005811	39	290	3811	0	video	YourMovez	7	154	0	0	0	1	6	Intervention measure
3929005812	39	290	3812	0	video	YourMovez	1	26	0	0	1	1	6	Intervention measure
3929005813	39	290	3813	0	video	YourMovez	3	78	0	0	0	1	6	Intervention measure
3929105816	39	291	3816	5	video	BoysVsGirls	0	0	0	0	0	4	6	Intervention measure
3929105817	39	291	3817	5	video	BoysVsGirls	0	0	0	0	0	4	6	Intervention measure
3929105818	39	291	3818	0	video	BoysVsGirls	2	224	0	0	0	4	6	Intervention measure
3929105820	39	291	3820	5	video	BoysVsGirls	13	899	0	0	1	4	6	Intervention measure
3929105821	39	291	3821	0	video	BoysVsGirls	0	0	0	0	0	4	6	Intervention measure
3929105822	39	291	3822	0	video	BoysVsGirls	0	0	0	0	0	4	6	Intervention measure
3929105823	39	291	3823	0	video	BoysVsGirls	5	553	0	0	0	4	6	Intervention measure
3929105824	39	291	3824	0	video	BoysVsGirls	0	0	0	0	0	4	6	Intervention measure
3929105825	39	291	3825	0	video	BoysVsGirls	0	0	0	0	0	4	6	Intervention measure
3929105826	39	291	3826	0	video	BoysVsGirls	0	0	0	0	0	4	6	Intervention measure
3929105828	39	291	3828	0	video	BoysVsGirls	1	112	0	0	0	4	6	Intervention measure
3929105829	39	291	3829	0	video	BoysVsGirls	0	0	0	0	0	4	6	Intervention measure
3929105830	39	291	3830	0	video	BoysVsGirls	0	0	0	0	0	4	6	Intervention measure
3929105831	39	291	3831	0	video	BoysVsGirls	0	0	0	0	0	4	6	Intervention measure
3929105832	39	291	3832	0	video	BoysVsGirls	0	0	0	0	0	4	6	Intervention measure
3929105833	39	291	3833	0	video	BoysVsGirls	0	0	0	0	0	4	6	Intervention measure
3929105816	39	291	3816	5	video	Challange	1	27	0	0	1	3	6	Intervention measure
3929105817	39	291	3817	5	video	Challange	0	0	0	0	0	3	6	Intervention measure
3929105818	39	291	3818	0	video	Challange	2	54	0	0	0	3	6	Intervention measure
3929105820	39	291	3820	5	video	Challange	9	210	0	0	0	3	6	Intervention measure
3929105821	39	291	3821	0	video	Challange	1	27	0	0	0	3	6	Intervention measure
3929105822	39	291	3822	0	video	Challange	0	0	0	0	0	3	6	Intervention measure
3929105823	39	291	3823	0	video	Challange	6	135	0	0	0	3	6	Intervention measure
3929105824	39	291	3824	0	video	Challange	0	0	0	0	0	3	6	Intervention measure
3929105825	39	291	3825	0	video	Challange	0	0	0	0	0	3	6	Intervention measure
3929105826	39	291	3826	0	video	Challange	1	27	0	0	0	3	6	Intervention measure
3929105828	39	291	3828	0	video	Challange	1	27	0	0	0	3	6	Intervention measure
3929105829	39	291	3829	0	video	Challange	0	0	0	0	0	3	6	Intervention measure
3929105830	39	291	3830	0	video	Challange	1	27	0	0	0	3	6	Intervention measure
3929105831	39	291	3831	0	video	Challange	0	0	0	0	0	3	6	Intervention measure
3929105832	39	291	3832	0	video	Challange	1	27	0	0	0	3	6	Intervention measure
3929105833	39	291	3833	0	video	Challange	0	0	0	0	0	3	6	Intervention measure
3929105816	39	291	3816	5	video	CouchPotato	0	0	0	0	0	5	6	Intervention measure
3929105817	39	291	3817	5	video	CouchPotato	0	0	0	0	0	5	6	Intervention measure
3929105818	39	291	3818	0	video	CouchPotato	0	0	0	0	0	5	6	Intervention measure
3929105820	39	291	3820	5	video	CouchPotato	4	150	0	0	0	5	6	Intervention measure
3929105821	39	291	3821	0	video	CouchPotato	0	0	0	0	0	5	6	Intervention measure
3929105822	39	291	3822	0	video	CouchPotato	2	86	0	0	0	5	6	Intervention measure
3929105823	39	291	3823	0	video	CouchPotato	3	147	0	0	0	5	6	Intervention measure
3929105824	39	291	3824	0	video	CouchPotato	0	0	0	0	0	5	6	Intervention measure
3929105825	39	291	3825	0	video	CouchPotato	0	0	0	0	0	5	6	Intervention measure
3929105826	39	291	3826	0	video	CouchPotato	0	0	0	0	0	5	6	Intervention measure
3929105828	39	291	3828	0	video	CouchPotato	0	0	0	0	0	5	6	Intervention measure
3929105829	39	291	3829	0	video	CouchPotato	1	49	0	0	0	5	6	Intervention measure
3929105830	39	291	3830	0	video	CouchPotato	0	0	0	0	0	5	6	Intervention measure
3929105831	39	291	3831	0	video	CouchPotato	0	0	0	0	0	5	6	Intervention measure
3929105832	39	291	3832	0	video	CouchPotato	0	0	0	0	0	5	6	Intervention measure
3929105833	39	291	3833	0	video	CouchPotato	0	0	0	0	0	5	6	Intervention measure
3929105816	39	291	3816	5	video	Motivate	1	33	0	0	1	2	6	Intervention measure
3929105817	39	291	3817	5	video	Motivate	1	33	0	0	0	2	6	Intervention measure
3929105818	39	291	3818	0	video	Motivate	0	0	0	0	0	2	6	Intervention measure
3929105820	39	291	3820	5	video	Motivate	8	264	0	0	0	2	6	Intervention measure
3929105821	39	291	3821	0	video	Motivate	0	0	0	0	0	2	6	Intervention measure
3929105822	39	291	3822	0	video	Motivate	0	0	0	0	0	2	6	Intervention measure
3929105823	39	291	3823	0	video	Motivate	5	128	0	0	0	2	6	Intervention measure
3929105824	39	291	3824	0	video	Motivate	0	0	0	0	0	2	6	Intervention measure
3929105825	39	291	3825	0	video	Motivate	0	0	0	0	0	2	6	Intervention measure
3929105826	39	291	3826	0	video	Motivate	1	33	0	0	0	2	6	Intervention measure
3929105828	39	291	3828	0	video	Motivate	1	33	0	0	0	2	6	Intervention measure
3929105829	39	291	3829	0	video	Motivate	2	35	0	0	0	2	6	Intervention measure
3929105830	39	291	3830	0	video	Motivate	1	33	0	0	0	2	6	Intervention measure
3929105831	39	291	3831	0	video	Motivate	1	33	0	0	0	2	6	Intervention measure
3929105832	39	291	3832	0	video	Motivate	0	0	0	0	0	2	6	Intervention measure
3929105833	39	291	3833	0	video	Motivate	0	0	0	0	0	2	6	Intervention measure
3929105816	39	291	3816	5	video	Voorstel	0	0	0	0	0	0	6	Intervention measure
3929105817	39	291	3817	5	video	Voorstel	0	0	0	0	0	0	6	Intervention measure
3929105818	39	291	3818	0	video	Voorstel	3	60	0	0	0	0	6	Intervention measure
3929105820	39	291	3820	5	video	Voorstel	7	121	0	0	0	0	6	Intervention measure
3929105821	39	291	3821	0	video	Voorstel	3	60	0	0	0	0	6	Intervention measure
3929105822	39	291	3822	0	video	Voorstel	1	20	0	0	0	0	6	Intervention measure
3929105823	39	291	3823	0	video	Voorstel	13	260	0	0	0	0	6	Intervention measure
3929105824	39	291	3824	0	video	Voorstel	0	0	0	0	0	0	6	Intervention measure
3929105825	39	291	3825	0	video	Voorstel	1	20	0	0	0	0	6	Intervention measure
3929105826	39	291	3826	0	video	Voorstel	1	20	0	0	0	0	6	Intervention measure
3929105828	39	291	3828	0	video	Voorstel	3	60	0	0	0	0	6	Intervention measure
3929105829	39	291	3829	0	video	Voorstel	2	40	0	0	0	0	6	Intervention measure
3929105830	39	291	3830	0	video	Voorstel	3	60	0	0	0	0	6	Intervention measure
3929105831	39	291	3831	0	video	Voorstel	2	22	0	0	0	0	6	Intervention measure
3929105832	39	291	3832	0	video	Voorstel	1	20	0	0	0	0	6	Intervention measure
3929105833	39	291	3833	0	video	Voorstel	0	0	0	0	0	0	6	Intervention measure
3929105816	39	291	3816	5	video	YourMovez	0	0	0	0	0	1	6	Intervention measure
3929105817	39	291	3817	5	video	YourMovez	2	37	0	0	0	1	6	Intervention measure
3929105818	39	291	3818	0	video	YourMovez	0	0	0	0	0	1	6	Intervention measure
3929105820	39	291	3820	5	video	YourMovez	6	132	0	0	0	1	6	Intervention measure
3929105821	39	291	3821	0	video	YourMovez	1	24	0	0	0	1	6	Intervention measure
3929105822	39	291	3822	0	video	YourMovez	0	0	0	0	0	1	6	Intervention measure
3929105823	39	291	3823	0	video	YourMovez	5	112	0	0	0	1	6	Intervention measure
3929105824	39	291	3824	0	video	YourMovez	0	0	0	0	0	1	6	Intervention measure
3929105825	39	291	3825	0	video	YourMovez	1	23	0	0	0	1	6	Intervention measure
3929105826	39	291	3826	0	video	YourMovez	1	26	0	0	0	1	6	Intervention measure
3929105828	39	291	3828	0	video	YourMovez	1	26	0	0	0	1	6	Intervention measure
3929105829	39	291	3829	0	video	YourMovez	1	26	0	0	0	1	6	Intervention measure
3929105830	39	291	3830	0	video	YourMovez	3	49	0	0	0	1	6	Intervention measure
3929105831	39	291	3831	0	video	YourMovez	2	41	0	0	0	1	6	Intervention measure
3929105832	39	291	3832	0	video	YourMovez	1	26	0	0	0	1	6	Intervention measure
3929105833	39	291	3833	0	video	YourMovez	1	13	0	0	0	1	6	Intervention measure
5425605011	54	256	3011	7	video	BoysVsGirls	1	63	0	0	0	4	6	Intervention measure
5425605012	54	256	3012	7	video	BoysVsGirls	0	0	0	0	0	4	6	Intervention measure
5425605013	54	256	3013	0	video	BoysVsGirls	0	0	0	0	0	4	6	Intervention measure
5425605014	54	256	3014	0	video	BoysVsGirls	0	0	0	0	0	4	6	Intervention measure
5425605015	54	256	3015	0	video	BoysVsGirls	0	0	0	0	0	4	6	Intervention measure
5425605016	54	256	3016	0	video	BoysVsGirls	0	0	0	0	0	4	6	Intervention measure
5425605017	54	256	3017	0	video	BoysVsGirls	0	0	0	0	0	4	6	Intervention measure
5425605018	54	256	3018	7	video	BoysVsGirls	0	0	0	0	0	4	6	Intervention measure
5425605020	54	256	3020	0	video	BoysVsGirls	6	225	1	0	1	4	6	Intervention measure
5425605021	54	256	3021	0	video	BoysVsGirls	0	0	0	0	0	4	6	Intervention measure
5425605022	54	256	3022	0	video	BoysVsGirls	0	0	0	0	0	4	6	Intervention measure
5425605023	54	256	3023	0	video	BoysVsGirls	0	0	0	0	0	4	6	Intervention measure
5425605024	54	256	3024	7	video	BoysVsGirls	0	0	0	0	0	4	6	Intervention measure
5425605026	54	256	3026	0	video	BoysVsGirls	12	614	0	0	0	4	6	Intervention measure
5425605027	54	256	3027	0	video	BoysVsGirls	0	0	0	0	0	4	6	Intervention measure
5425605028	54	256	3028	0	video	BoysVsGirls	1	63	0	0	0	4	6	Intervention measure
5425605029	54	256	3029	0	video	BoysVsGirls	1	63	0	0	0	4	6	Intervention measure
5425605030	54	256	3030	0	video	BoysVsGirls	2	126	0	0	0	4	6	Intervention measure
5425605031	54	256	3031	0	video	BoysVsGirls	1	63	0	0	0	4	6	Intervention measure
5425605032	54	256	3032	0	video	BoysVsGirls	5	264	0	0	0	4	6	Intervention measure
5425605033	54	256	3033	0	video	BoysVsGirls	1	63	0	0	0	4	6	Intervention measure
5425605034	54	256	3034	0	video	BoysVsGirls	1	63	0	0	0	4	6	Intervention measure
5425605037	54	256	3037	0	video	BoysVsGirls	0	0	0	0	0	4	6	Intervention measure
5425605038	54	256	3038	0	video	BoysVsGirls	0	0	0	0	0	4	6	Intervention measure
5425605039	54	256	3039	0	video	BoysVsGirls	3	189	1	0	0	4	6	Intervention measure
5425605040	54	256	3040	0	video	BoysVsGirls	1	63	0	0	0	4	6	Intervention measure
5425605011	54	256	3011	7	video	Challange	0	0	0	0	0	3	6	Intervention measure
5425605012	54	256	3012	7	video	Challange	0	0	0	0	0	3	6	Intervention measure
5425605013	54	256	3013	0	video	Challange	0	0	0	0	0	3	6	Intervention measure
5425605014	54	256	3014	0	video	Challange	0	0	0	0	0	3	6	Intervention measure
5425605015	54	256	3015	0	video	Challange	0	0	0	0	0	3	6	Intervention measure
5425605016	54	256	3016	0	video	Challange	0	0	0	0	0	3	6	Intervention measure
5425605017	54	256	3017	0	video	Challange	0	0	0	0	0	3	6	Intervention measure
5425605018	54	256	3018	7	video	Challange	0	0	0	0	0	3	6	Intervention measure
5425605020	54	256	3020	0	video	Challange	6	69	0	0	0	3	6	Intervention measure
5425605021	54	256	3021	0	video	Challange	0	0	0	0	0	3	6	Intervention measure
5425605022	54	256	3022	0	video	Challange	0	0	0	0	0	3	6	Intervention measure
5425605023	54	256	3023	0	video	Challange	1	25	0	0	0	3	6	Intervention measure
5425605024	54	256	3024	7	video	Challange	0	0	0	0	0	3	6	Intervention measure
5425605026	54	256	3026	0	video	Challange	6	101	0	0	0	3	6	Intervention measure
5425605027	54	256	3027	0	video	Challange	0	0	0	0	0	3	6	Intervention measure
5425605028	54	256	3028	0	video	Challange	1	25	0	0	0	3	6	Intervention measure
5425605029	54	256	3029	0	video	Challange	1	25	0	0	0	3	6	Intervention measure
5425605030	54	256	3030	0	video	Challange	1	25	0	0	0	3	6	Intervention measure
5425605031	54	256	3031	0	video	Challange	1	25	0	0	0	3	6	Intervention measure
5425605032	54	256	3032	0	video	Challange	2	25	0	0	0	3	6	Intervention measure
5425605033	54	256	3033	0	video	Challange	1	25	0	0	0	3	6	Intervention measure
5425605034	54	256	3034	0	video	Challange	3	75	0	0	0	3	6	Intervention measure
5425605037	54	256	3037	0	video	Challange	1	25	0	0	0	3	6	Intervention measure
5425605038	54	256	3038	0	video	Challange	1	25	0	0	0	3	6	Intervention measure
5425605039	54	256	3039	0	video	Challange	3	60	0	0	0	3	6	Intervention measure
5425605040	54	256	3040	0	video	Challange	3	75	0	0	0	3	6	Intervention measure
5425605011	54	256	3011	7	video	CouchPotato	0	0	0	0	0	5	6	Intervention measure
5425605012	54	256	3012	7	video	CouchPotato	0	0	0	0	0	5	6	Intervention measure
5425605013	54	256	3013	0	video	CouchPotato	0	0	0	0	0	5	6	Intervention measure
5425605014	54	256	3014	0	video	CouchPotato	0	0	0	0	0	5	6	Intervention measure
5425605015	54	256	3015	0	video	CouchPotato	0	0	0	0	0	5	6	Intervention measure
5425605016	54	256	3016	0	video	CouchPotato	0	0	0	0	0	5	6	Intervention measure
5425605017	54	256	3017	0	video	CouchPotato	0	0	0	0	0	5	6	Intervention measure
5425605018	54	256	3018	7	video	CouchPotato	0	0	0	0	0	5	6	Intervention measure
5425605020	54	256	3020	0	video	CouchPotato	0	0	0	0	0	5	6	Intervention measure
5425605021	54	256	3021	0	video	CouchPotato	0	0	0	0	0	5	6	Intervention measure
5425605022	54	256	3022	0	video	CouchPotato	0	0	0	0	0	5	6	Intervention measure
5425605023	54	256	3023	0	video	CouchPotato	0	0	0	0	0	5	6	Intervention measure
5425605024	54	256	3024	7	video	CouchPotato	0	0	0	0	0	5	6	Intervention measure
5425605026	54	256	3026	0	video	CouchPotato	4	116	0	0	0	5	6	Intervention measure
5425605027	54	256	3027	0	video	CouchPotato	0	0	0	0	0	5	6	Intervention measure
5425605028	54	256	3028	0	video	CouchPotato	1	43	0	0	0	5	6	Intervention measure
5425605029	54	256	3029	0	video	CouchPotato	1	43	0	0	0	5	6	Intervention measure
5425605030	54	256	3030	0	video	CouchPotato	3	88	0	0	0	5	6	Intervention measure
5425605031	54	256	3031	0	video	CouchPotato	0	0	0	0	0	5	6	Intervention measure
5425605032	54	256	3032	0	video	CouchPotato	4	96	0	0	0	5	6	Intervention measure
5425605033	54	256	3033	0	video	CouchPotato	1	43	0	0	0	5	6	Intervention measure
5425605034	54	256	3034	0	video	CouchPotato	1	43	0	0	0	5	6	Intervention measure
5425605037	54	256	3037	0	video	CouchPotato	1	43	0	0	0	5	6	Intervention measure
5425605038	54	256	3038	0	video	CouchPotato	0	0	0	0	0	5	6	Intervention measure
5425605039	54	256	3039	0	video	CouchPotato	3	51	0	0	0	5	6	Intervention measure
5425605040	54	256	3040	0	video	CouchPotato	0	0	0	0	0	5	6	Intervention measure
5425605011	54	256	3011	7	video	Motivate	1	56	0	0	0	2	6	Intervention measure
5425605012	54	256	3012	7	video	Motivate	0	0	0	0	0	2	6	Intervention measure
5425605013	54	256	3013	0	video	Motivate	2	112	0	0	0	2	6	Intervention measure
5425605014	54	256	3014	0	video	Motivate	0	0	0	0	0	2	6	Intervention measure
5425605015	54	256	3015	0	video	Motivate	1	56	0	0	0	2	6	Intervention measure
5425605016	54	256	3016	0	video	Motivate	0	0	0	0	0	2	6	Intervention measure
5425605017	54	256	3017	0	video	Motivate	0	0	0	0	0	2	6	Intervention measure
5425605018	54	256	3018	7	video	Motivate	0	0	0	0	0	2	6	Intervention measure
5425605020	54	256	3020	0	video	Motivate	2	57	0	0	0	2	6	Intervention measure
5425605021	54	256	3021	0	video	Motivate	1	56	0	0	0	2	6	Intervention measure
5425605022	54	256	3022	0	video	Motivate	0	0	0	0	0	2	6	Intervention measure
5425605023	54	256	3023	0	video	Motivate	1	56	0	0	0	2	6	Intervention measure
5425605024	54	256	3024	7	video	Motivate	0	0	0	0	0	2	6	Intervention measure
5425605026	54	256	3026	0	video	Motivate	10	324	0	0	0	2	6	Intervention measure
5425605027	54	256	3027	0	video	Motivate	0	0	0	0	0	2	6	Intervention measure
5425605028	54	256	3028	0	video	Motivate	1	56	0	0	0	2	6	Intervention measure
5425605029	54	256	3029	0	video	Motivate	1	56	0	0	0	2	6	Intervention measure
5425605030	54	256	3030	0	video	Motivate	1	56	0	0	0	2	6	Intervention measure
5425605031	54	256	3031	0	video	Motivate	3	168	0	0	0	2	6	Intervention measure
5425605032	54	256	3032	0	video	Motivate	3	168	0	0	0	2	6	Intervention measure
5425605033	54	256	3033	0	video	Motivate	1	56	0	0	0	2	6	Intervention measure
5425605034	54	256	3034	0	video	Motivate	3	114	0	0	0	2	6	Intervention measure
5425605037	54	256	3037	0	video	Motivate	0	0	0	0	0	2	6	Intervention measure
5425605038	54	256	3038	0	video	Motivate	0	0	0	0	0	2	6	Intervention measure
5425605039	54	256	3039	0	video	Motivate	1	56	0	0	0	2	6	Intervention measure
5425605040	54	256	3040	0	video	Motivate	3	134	0	0	0	2	6	Intervention measure
5425605011	54	256	3011	7	video	Voorstel	1	29	0	0	0	0	6	Intervention measure
5425605012	54	256	3012	7	video	Voorstel	0	0	0	0	0	0	6	Intervention measure
5425605013	54	256	3013	0	video	Voorstel	4	116	0	0	0	0	6	Intervention measure
5425605014	54	256	3014	0	video	Voorstel	0	0	0	0	0	0	6	Intervention measure
5425605015	54	256	3015	0	video	Voorstel	5	145	0	0	0	0	6	Intervention measure
5425605016	54	256	3016	0	video	Voorstel	2	58	0	0	0	0	6	Intervention measure
5425605017	54	256	3017	0	video	Voorstel	0	0	0	0	0	0	6	Intervention measure
5425605018	54	256	3018	7	video	Voorstel	1	29	0	0	0	0	6	Intervention measure
5425605020	54	256	3020	0	video	Voorstel	3	58	0	0	0	0	6	Intervention measure
5425605021	54	256	3021	0	video	Voorstel	3	31	0	0	0	0	6	Intervention measure
5425605022	54	256	3022	0	video	Voorstel	0	0	0	0	0	0	6	Intervention measure
5425605023	54	256	3023	0	video	Voorstel	2	57	0	0	0	0	6	Intervention measure
5425605024	54	256	3024	7	video	Voorstel	0	0	0	0	0	0	6	Intervention measure
5425605026	54	256	3026	0	video	Voorstel	12	253	0	0	0	0	6	Intervention measure
5425605027	54	256	3027	0	video	Voorstel	0	0	0	0	0	0	6	Intervention measure
5425605028	54	256	3028	0	video	Voorstel	4	116	0	0	0	0	6	Intervention measure
5425605029	54	256	3029	0	video	Voorstel	2	58	0	0	0	0	6	Intervention measure
5425605030	54	256	3030	0	video	Voorstel	7	176	0	0	0	0	6	Intervention measure
5425605031	54	256	3031	0	video	Voorstel	2	58	0	0	0	0	6	Intervention measure
5425605032	54	256	3032	0	video	Voorstel	7	163	0	0	0	0	6	Intervention measure
5425605033	54	256	3033	0	video	Voorstel	1	29	0	0	0	0	6	Intervention measure
5425605034	54	256	3034	0	video	Voorstel	8	232	0	0	0	0	6	Intervention measure
5425605037	54	256	3037	0	video	Voorstel	3	87	0	0	0	0	6	Intervention measure
5425605038	54	256	3038	0	video	Voorstel	0	0	0	0	0	0	6	Intervention measure
5425605039	54	256	3039	0	video	Voorstel	4	62	0	0	0	0	6	Intervention measure
5425605040	54	256	3040	0	video	Voorstel	5	145	0	0	0	0	6	Intervention measure
5425605011	54	256	3011	7	video	YourMovez	0	0	0	0	0	1	6	Intervention measure
5425605012	54	256	3012	7	video	YourMovez	0	0	0	0	0	1	6	Intervention measure
5425605013	54	256	3013	0	video	YourMovez	1	56	0	0	0	1	6	Intervention measure
5425605014	54	256	3014	0	video	YourMovez	0	0	0	0	0	1	6	Intervention measure
5425605015	54	256	3015	0	video	YourMovez	1	56	0	0	0	1	6	Intervention measure
5425605016	54	256	3016	0	video	YourMovez	0	0	0	0	0	1	6	Intervention measure
5425605017	54	256	3017	0	video	YourMovez	1	56	0	0	0	1	6	Intervention measure
5425605018	54	256	3018	7	video	YourMovez	0	0	0	0	0	1	6	Intervention measure
5425605020	54	256	3020	0	video	YourMovez	2	66	0	0	0	1	6	Intervention measure
5425605021	54	256	3021	0	video	YourMovez	2	110	0	0	0	1	6	Intervention measure
5425605022	54	256	3022	0	video	YourMovez	0	0	0	0	0	1	6	Intervention measure
5425605023	54	256	3023	0	video	YourMovez	0	0	0	0	0	1	6	Intervention measure
5425605024	54	256	3024	7	video	YourMovez	0	0	0	0	0	1	6	Intervention measure
5425605026	54	256	3026	0	video	YourMovez	12	352	0	0	0	1	6	Intervention measure
5425605027	54	256	3027	0	video	YourMovez	0	0	0	0	0	1	6	Intervention measure
5425605028	54	256	3028	0	video	YourMovez	1	56	0	0	0	1	6	Intervention measure
5425605029	54	256	3029	0	video	YourMovez	1	56	0	0	0	1	6	Intervention measure
5425605030	54	256	3030	0	video	YourMovez	1	56	0	0	0	1	6	Intervention measure
5425605031	54	256	3031	0	video	YourMovez	1	56	0	0	0	1	6	Intervention measure
5425605032	54	256	3032	0	video	YourMovez	2	99	0	0	0	1	6	Intervention measure
5425605033	54	256	3033	0	video	YourMovez	1	56	0	0	0	1	6	Intervention measure
5425605034	54	256	3034	0	video	YourMovez	3	153	0	0	0	1	6	Intervention measure
5425605037	54	256	3037	0	video	YourMovez	2	57	0	0	0	1	6	Intervention measure
5425605038	54	256	3038	0	video	YourMovez	0	0	0	0	0	1	6	Intervention measure
5425605039	54	256	3039	0	video	YourMovez	3	168	0	0	0	1	6	Intervention measure
5425605040	54	256	3040	0	video	YourMovez	3	115	0	0	0	1	6	Intervention measure
5425805070	54	258	3070	0	video	YourMovez	10	398	0	0	0	1	6	Intervention measure
5425805071	54	258	3071	7	video	YourMovez	5	265	0	0	0	1	6	Intervention measure
5425805075	54	258	3075	7	video	YourMovez	2	120	0	0	0	1	6	Intervention measure
5425805076	54	258	3076	7	video	YourMovez	7	362	0	0	0	1	6	Intervention measure
5425805077	54	258	3077	7	video	YourMovez	1	60	0	0	0	1	6	Intervention measure
5425805078	54	258	3078	0	video	YourMovez	4	68	0	0	0	1	6	Intervention measure
5425805079	54	258	3079	0	video	YourMovez	0	0	0	0	0	1	6	Intervention measure
5425805080	54	258	3080	0	video	YourMovez	4	178	0	0	0	1	6	Intervention measure
5425805081	54	258	3081	0	video	YourMovez	1	60	0	0	1	1	6	Intervention measure
5425805082	54	258	3082	0	video	YourMovez	0	0	0	0	0	1	6	Intervention measure
5425805083	54	258	3083	0	video	YourMovez	0	0	0	0	0	1	6	Intervention measure
5425805084	54	258	3084	0	video	YourMovez	4	187	0	0	0	1	6	Intervention measure
5425805085	54	258	3085	0	video	YourMovez	0	0	0	0	0	1	6	Intervention measure
5425805086	54	258	3086	0	video	YourMovez	1	60	0	0	0	1	6	Intervention measure
5425805087	54	258	3087	0	video	YourMovez	0	0	0	0	0	1	6	Intervention measure
5425805089	54	258	3089	0	video	YourMovez	1	60	0	0	0	1	6	Intervention measure
5425805090	54	258	3090	0	video	YourMovez	3	139	0	0	0	1	6	Intervention measure
5425805092	54	258	3092	0	video	YourMovez	5	241	0	0	0	1	6	Intervention measure
5425805093	54	258	3093	0	video	YourMovez	1	60	0	0	0	1	6	Intervention measure
5425805094	54	258	3094	0	video	YourMovez	4	239	0	0	0	1	6	Intervention measure
5425805095	54	258	3095	0	video	YourMovez	5	188	0	0	0	1	6	Intervention measure
5425805096	54	258	3096	0	video	YourMovez	8	277	0	0	0	1	6	Intervention measure
5425805097	54	258	3097	0	video	YourMovez	0	0	0	0	0	1	6	Intervention measure
5425805098	54	258	3098	0	video	YourMovez	5	300	0	0	0	1	6	Intervention measure
5425805099	54	258	3099	0	video	YourMovez	3	180	0	0	0	1	6	Intervention measure
5425805070	54	258	3070	0	video	Voorstel	9	287	0	0	0	0	6	Intervention measure
5425805071	54	258	3071	7	video	Voorstel	2	64	0	0	0	0	6	Intervention measure
5425805075	54	258	3075	7	video	Voorstel	1	32	0	0	0	0	6	Intervention measure
5425805076	54	258	3076	7	video	Voorstel	12	280	0	0	0	0	6	Intervention measure
5425805077	54	258	3077	7	video	Voorstel	1	32	0	0	0	0	6	Intervention measure
5425805078	54	258	3078	0	video	Voorstel	4	66	0	0	0	0	6	Intervention measure
5425805079	54	258	3079	0	video	Voorstel	0	0	0	0	0	0	6	Intervention measure
5425805080	54	258	3080	0	video	Voorstel	8	180	0	0	0	0	6	Intervention measure
5425805081	54	258	3081	0	video	Voorstel	0	0	0	0	0	0	6	Intervention measure
5425805082	54	258	3082	0	video	Voorstel	1	32	0	0	0	0	6	Intervention measure
5425805083	54	258	3083	0	video	Voorstel	0	0	0	0	0	0	6	Intervention measure
5425805084	54	258	3084	0	video	Voorstel	3	96	0	0	0	0	6	Intervention measure
5425805085	54	258	3085	0	video	Voorstel	3	77	0	0	0	0	6	Intervention measure
5425805086	54	258	3086	0	video	Voorstel	1	32	0	0	0	0	6	Intervention measure
5425805087	54	258	3087	0	video	Voorstel	3	96	0	0	0	0	6	Intervention measure
5425805089	54	258	3089	0	video	Voorstel	2	32	0	0	0	0	6	Intervention measure
5425805090	54	258	3090	0	video	Voorstel	6	172	0	0	0	0	6	Intervention measure
5425805092	54	258	3092	0	video	Voorstel	7	202	0	0	0	0	6	Intervention measure
5425805093	54	258	3093	0	video	Voorstel	1	32	0	0	0	0	6	Intervention measure
5425805094	54	258	3094	0	video	Voorstel	3	66	0	0	0	0	6	Intervention measure
5425805095	54	258	3095	0	video	Voorstel	4	98	0	0	0	0	6	Intervention measure
5425805096	54	258	3096	0	video	Voorstel	2	64	0	0	0	0	6	Intervention measure
5425805097	54	258	3097	0	video	Voorstel	1	32	0	0	0	0	6	Intervention measure
5425805098	54	258	3098	0	video	Voorstel	4	97	0	0	0	0	6	Intervention measure
5425805099	54	258	3099	0	video	Voorstel	1	32	0	0	0	0	6	Intervention measure
5425805070	54	258	3070	0	video	Motivate	6	140	0	0	0	2	6	Intervention measure
5425805071	54	258	3071	7	video	Motivate	1	79	0	0	0	2	6	Intervention measure
5425805075	54	258	3075	7	video	Motivate	1	79	0	0	0	2	6	Intervention measure
5425805076	54	258	3076	7	video	Motivate	3	172	0	0	0	2	6	Intervention measure
5425805077	54	258	3077	7	video	Motivate	0	0	0	0	0	2	6	Intervention measure
5425805078	54	258	3078	0	video	Motivate	2	86	0	0	0	2	6	Intervention measure
5425805079	54	258	3079	0	video	Motivate	0	0	0	0	0	2	6	Intervention measure
5425805080	54	258	3080	0	video	Motivate	1	79	0	0	0	2	6	Intervention measure
5425805081	54	258	3081	0	video	Motivate	1	79	0	0	0	2	6	Intervention measure
5425805082	54	258	3082	0	video	Motivate	0	0	0	0	0	2	6	Intervention measure
5425805083	54	258	3083	0	video	Motivate	0	0	0	0	0	2	6	Intervention measure
5425805084	54	258	3084	0	video	Motivate	3	237	0	0	0	2	6	Intervention measure
5425805085	54	258	3085	0	video	Motivate	0	0	0	0	0	2	6	Intervention measure
5425805086	54	258	3086	0	video	Motivate	1	78	0	0	0	2	6	Intervention measure
5425805087	54	258	3087	0	video	Motivate	0	0	0	0	0	2	6	Intervention measure
5425805089	54	258	3089	0	video	Motivate	1	79	0	0	0	2	6	Intervention measure
5425805090	54	258	3090	0	video	Motivate	1	79	0	0	0	2	6	Intervention measure
5425805092	54	258	3092	0	video	Motivate	3	210	0	0	0	2	6	Intervention measure
5425805093	54	258	3093	0	video	Motivate	1	79	0	0	0	2	6	Intervention measure
5425805094	54	258	3094	0	video	Motivate	2	157	0	0	0	2	6	Intervention measure
5425805095	54	258	3095	0	video	Motivate	1	79	0	0	0	2	6	Intervention measure
5425805096	54	258	3096	0	video	Motivate	2	158	0	0	0	2	6	Intervention measure
5425805097	54	258	3097	0	video	Motivate	0	0	0	0	0	2	6	Intervention measure
5425805098	54	258	3098	0	video	Motivate	3	132	0	0	0	2	6	Intervention measure
5425805099	54	258	3099	0	video	Motivate	1	79	0	0	0	2	6	Intervention measure
5425805070	54	258	3070	0	video	CouchPotato	4	91	0	0	0	5	6	Intervention measure
5425805071	54	258	3071	7	video	CouchPotato	2	69	0	0	0	5	6	Intervention measure
5425805075	54	258	3075	7	video	CouchPotato	1	43	0	0	0	5	6	Intervention measure
5425805076	54	258	3076	7	video	CouchPotato	2	46	0	0	0	5	6	Intervention measure
5425805077	54	258	3077	7	video	CouchPotato	0	0	0	0	0	5	6	Intervention measure
5425805078	54	258	3078	0	video	CouchPotato	2	86	0	0	0	5	6	Intervention measure
5425805079	54	258	3079	0	video	CouchPotato	0	0	0	0	0	5	6	Intervention measure
5425805080	54	258	3080	0	video	CouchPotato	5	202	0	0	0	5	6	Intervention measure
5425805081	54	258	3081	0	video	CouchPotato	0	0	0	0	0	5	6	Intervention measure
5425805082	54	258	3082	0	video	CouchPotato	0	0	0	0	0	5	6	Intervention measure
5425805083	54	258	3083	0	video	CouchPotato	0	0	0	0	0	5	6	Intervention measure
5425805084	54	258	3084	0	video	CouchPotato	2	65	0	0	0	5	6	Intervention measure
5425805085	54	258	3085	0	video	CouchPotato	0	0	0	0	0	5	6	Intervention measure
5425805086	54	258	3086	0	video	CouchPotato	0	0	0	0	0	5	6	Intervention measure
5425805087	54	258	3087	0	video	CouchPotato	0	0	0	0	0	5	6	Intervention measure
5425805089	54	258	3089	0	video	CouchPotato	0	0	0	0	0	5	6	Intervention measure
5425805090	54	258	3090	0	video	CouchPotato	0	0	0	0	0	5	6	Intervention measure
5425805092	54	258	3092	0	video	CouchPotato	6	244	0	0	0	5	6	Intervention measure
5425805093	54	258	3093	0	video	CouchPotato	1	43	0	0	0	5	6	Intervention measure
5425805094	54	258	3094	0	video	CouchPotato	0	0	0	0	0	5	6	Intervention measure
5425805095	54	258	3095	0	video	CouchPotato	1	43	0	0	0	5	6	Intervention measure
5425805096	54	258	3096	0	video	CouchPotato	4	170	0	0	0	5	6	Intervention measure
5425805097	54	258	3097	0	video	CouchPotato	0	0	0	0	0	5	6	Intervention measure
5425805098	54	258	3098	0	video	CouchPotato	2	55	0	0	0	5	6	Intervention measure
5425805099	54	258	3099	0	video	CouchPotato	1	43	0	0	0	5	6	Intervention measure
5425805070	54	258	3070	0	video	Challange	6	129	0	0	0	3	6	Intervention measure
5425805071	54	258	3071	7	video	Challange	1	40	0	0	0	3	6	Intervention measure
5425805075	54	258	3075	7	video	Challange	1	40	0	0	0	3	6	Intervention measure
5425805076	54	258	3076	7	video	Challange	8	264	0	0	0	3	6	Intervention measure
5425805077	54	258	3077	7	video	Challange	0	0	0	0	0	3	6	Intervention measure
5425805078	54	258	3078	0	video	Challange	1	40	0	0	0	3	6	Intervention measure
5425805079	54	258	3079	0	video	Challange	0	0	0	0	0	3	6	Intervention measure
5425805080	54	258	3080	0	video	Challange	3	102	0	0	0	3	6	Intervention measure
5425805081	54	258	3081	0	video	Challange	0	0	0	0	0	3	6	Intervention measure
5425805082	54	258	3082	0	video	Challange	0	0	0	0	0	3	6	Intervention measure
5425805083	54	258	3083	0	video	Challange	0	0	0	0	0	3	6	Intervention measure
5425805084	54	258	3084	0	video	Challange	2	80	0	0	0	3	6	Intervention measure
5425805085	54	258	3085	0	video	Challange	0	0	0	0	0	3	6	Intervention measure
5425805086	54	258	3086	0	video	Challange	0	0	0	0	0	3	6	Intervention measure
5425805087	54	258	3087	0	video	Challange	0	0	0	0	0	3	6	Intervention measure
5425805089	54	258	3089	0	video	Challange	0	0	0	0	0	3	6	Intervention measure
5425805090	54	258	3090	0	video	Challange	3	84	0	0	0	3	6	Intervention measure
5425805092	54	258	3092	0	video	Challange	5	200	0	0	1	3	6	Intervention measure
5425805093	54	258	3093	0	video	Challange	1	40	0	0	0	3	6	Intervention measure
5425805094	54	258	3094	0	video	Challange	4	160	0	0	0	3	6	Intervention measure
5425805095	54	258	3095	0	video	Challange	1	40	0	0	0	3	6	Intervention measure
5425805096	54	258	3096	0	video	Challange	2	80	0	0	0	3	6	Intervention measure
5425805097	54	258	3097	0	video	Challange	0	0	0	0	0	3	6	Intervention measure
5425805098	54	258	3098	0	video	Challange	1	40	0	0	0	3	6	Intervention measure
5425805099	54	258	3099	0	video	Challange	1	40	0	0	0	3	6	Intervention measure
5425805070	54	258	3070	0	video	BoysVsGirls	3	192	0	0	0	4	6	Intervention measure
5425805071	54	258	3071	7	video	BoysVsGirls	5	312	0	0	0	4	6	Intervention measure
5425805075	54	258	3075	7	video	BoysVsGirls	2	126	0	0	0	4	6	Intervention measure
5425805076	54	258	3076	7	video	BoysVsGirls	6	321	0	0	0	4	6	Intervention measure
5425805077	54	258	3077	7	video	BoysVsGirls	0	0	0	0	0	4	6	Intervention measure
5425805078	54	258	3078	0	video	BoysVsGirls	2	81	0	0	0	4	6	Intervention measure
5425805079	54	258	3079	0	video	BoysVsGirls	0	0	0	0	0	4	6	Intervention measure
5425805080	54	258	3080	0	video	BoysVsGirls	2	130	0	0	0	4	6	Intervention measure
5425805081	54	258	3081	0	video	BoysVsGirls	2	75	0	0	0	4	6	Intervention measure
5425805082	54	258	3082	0	video	BoysVsGirls	0	0	0	0	0	4	6	Intervention measure
5425805083	54	258	3083	0	video	BoysVsGirls	0	0	0	0	0	4	6	Intervention measure
5425805084	54	258	3084	0	video	BoysVsGirls	2	130	0	0	0	4	6	Intervention measure
5425805085	54	258	3085	0	video	BoysVsGirls	0	0	0	0	0	4	6	Intervention measure
5425805086	54	258	3086	0	video	BoysVsGirls	0	0	0	0	0	4	6	Intervention measure
5425805087	54	258	3087	0	video	BoysVsGirls	0	0	0	0	0	4	6	Intervention measure
5425805089	54	258	3089	0	video	BoysVsGirls	0	0	0	0	0	4	6	Intervention measure
5425805090	54	258	3090	0	video	BoysVsGirls	0	0	0	0	0	4	6	Intervention measure
5425805092	54	258	3092	0	video	BoysVsGirls	3	189	0	0	0	4	6	Intervention measure
5425805093	54	258	3093	0	video	BoysVsGirls	1	65	0	0	0	4	6	Intervention measure
5425805094	54	258	3094	0	video	BoysVsGirls	0	0	0	0	0	4	6	Intervention measure
5425805095	54	258	3095	0	video	BoysVsGirls	2	126	0	0	0	4	6	Intervention measure
5425805096	54	258	3096	0	video	BoysVsGirls	1	65	0	0	0	4	6	Intervention measure
5425805097	54	258	3097	0	video	BoysVsGirls	0	0	0	0	0	4	6	Intervention measure
5425805098	54	258	3098	0	video	BoysVsGirls	1	65	0	0	0	4	6	Intervention measure
5425805099	54	258	3099	0	video	BoysVsGirls	4	211	0	0	0	4	6	Intervention measure
5425905100	54	259	3100	0	video	YourMovez	0	0	0	0	0	1	6	Intervention measure
5425905103	54	259	3103	7	video	YourMovez	0	0	0	0	0	1	6	Intervention measure
5425905104	54	259	3104	0	video	YourMovez	0	0	0	0	0	1	6	Intervention measure
5425905108	54	259	3108	0	video	YourMovez	2	48	0	0	0	1	6	Intervention measure
5425905109	54	259	3109	0	video	YourMovez	1	38	0	0	0	1	6	Intervention measure
5425905111	54	259	3111	7	video	YourMovez	2	50	0	0	0	1	6	Intervention measure
5425905115	54	259	3115	7	video	YourMovez	1	38	1	0	0	1	6	Intervention measure
5425905116	54	259	3116	7	video	YourMovez	0	0	0	0	0	1	6	Intervention measure
5425905118	54	259	3118	0	video	YourMovez	2	75	0	0	0	1	6	Intervention measure
5425905119	54	259	3119	0	video	YourMovez	0	0	0	0	0	1	6	Intervention measure
5425905120	54	259	3120	0	video	YourMovez	2	76	1	0	1	1	6	Intervention measure
5425905121	54	259	3121	0	video	YourMovez	1	38	0	0	0	1	6	Intervention measure
5425905122	54	259	3122	0	video	YourMovez	0	0	0	0	0	1	6	Intervention measure
5425905124	54	259	3124	0	video	YourMovez	0	0	0	0	0	1	6	Intervention measure
5425905125	54	259	3125	0	video	YourMovez	0	0	0	0	0	1	6	Intervention measure
5425905126	54	259	3126	0	video	YourMovez	2	76	0	0	0	1	6	Intervention measure
5425905128	54	259	3128	0	video	YourMovez	2	76	0	0	0	1	6	Intervention measure
5425905100	54	259	3100	0	video	Voorstel	0	0	0	0	0	0	6	Intervention measure
5425905103	54	259	3103	7	video	Voorstel	0	0	0	0	0	0	6	Intervention measure
5425905104	54	259	3104	0	video	Voorstel	0	0	0	0	0	0	6	Intervention measure
5425905108	54	259	3108	0	video	Voorstel	1	26	0	0	0	0	6	Intervention measure
5425905109	54	259	3109	0	video	Voorstel	1	26	0	0	0	0	6	Intervention measure
5425905111	54	259	3111	7	video	Voorstel	2	52	0	0	0	0	6	Intervention measure
5425905115	54	259	3115	7	video	Voorstel	2	52	0	0	0	0	6	Intervention measure
5425905116	54	259	3116	7	video	Voorstel	1	26	0	0	0	0	6	Intervention measure
5425905118	54	259	3118	0	video	Voorstel	4	80	0	0	0	0	6	Intervention measure
5425905119	54	259	3119	0	video	Voorstel	0	0	0	0	0	0	6	Intervention measure
5425905120	54	259	3120	0	video	Voorstel	3	53	0	0	0	0	6	Intervention measure
5425905121	54	259	3121	0	video	Voorstel	4	80	0	0	0	0	6	Intervention measure
5425905122	54	259	3122	0	video	Voorstel	1	26	0	0	0	0	6	Intervention measure
5425905124	54	259	3124	0	video	Voorstel	0	0	0	0	0	0	6	Intervention measure
5425905125	54	259	3125	0	video	Voorstel	14	110	0	0	0	0	6	Intervention measure
5425905126	54	259	3126	0	video	Voorstel	3	38	0	0	0	0	6	Intervention measure
5425905128	54	259	3128	0	video	Voorstel	4	84	0	0	0	0	6	Intervention measure
5425905100	54	259	3100	0	video	Motivate	0	0	0	0	0	2	6	Intervention measure
5425905103	54	259	3103	7	video	Motivate	0	0	0	0	0	2	6	Intervention measure
5425905104	54	259	3104	0	video	Motivate	0	0	0	0	0	2	6	Intervention measure
5425905108	54	259	3108	0	video	Motivate	1	66	0	0	0	2	6	Intervention measure
5425905109	54	259	3109	0	video	Motivate	1	66	0	0	0	2	6	Intervention measure
5425905111	54	259	3111	7	video	Motivate	2	88	0	0	0	2	6	Intervention measure
5425905115	54	259	3115	7	video	Motivate	2	132	1	0	0	2	6	Intervention measure
5425905116	54	259	3116	7	video	Motivate	1	66	0	0	0	2	6	Intervention measure
5425905118	54	259	3118	0	video	Motivate	2	132	0	0	0	2	6	Intervention measure
5425905119	54	259	3119	0	video	Motivate	0	0	0	0	0	2	6	Intervention measure
5425905120	54	259	3120	0	video	Motivate	3	69	0	0	1	2	6	Intervention measure
5425905121	54	259	3121	0	video	Motivate	0	0	0	0	0	2	6	Intervention measure
5425905122	54	259	3122	0	video	Motivate	1	66	0	0	0	2	6	Intervention measure
5425905124	54	259	3124	0	video	Motivate	0	0	0	0	0	2	6	Intervention measure
5425905125	54	259	3125	0	video	Motivate	1	66	0	0	0	2	6	Intervention measure
5425905126	54	259	3126	0	video	Motivate	3	198	0	0	0	2	6	Intervention measure
5425905128	54	259	3128	0	video	Motivate	6	330	1	0	0	2	6	Intervention measure
5425905100	54	259	3100	0	video	CouchPotato	0	0	0	0	0	5	6	Intervention measure
5425905103	54	259	3103	7	video	CouchPotato	0	0	0	0	0	5	6	Intervention measure
5425905104	54	259	3104	0	video	CouchPotato	0	0	0	0	0	5	6	Intervention measure
5425905108	54	259	3108	0	video	CouchPotato	1	85	0	0	0	5	6	Intervention measure
5425905109	54	259	3109	0	video	CouchPotato	1	85	0	0	0	5	6	Intervention measure
5425905111	54	259	3111	7	video	CouchPotato	0	0	0	0	0	5	6	Intervention measure
5425905115	54	259	3115	7	video	CouchPotato	1	85	0	0	0	5	6	Intervention measure
5425905116	54	259	3116	7	video	CouchPotato	5	341	0	0	0	5	6	Intervention measure
5425905118	54	259	3118	0	video	CouchPotato	1	85	0	0	0	5	6	Intervention measure
5425905119	54	259	3119	0	video	CouchPotato	0	0	0	0	0	5	6	Intervention measure
5425905120	54	259	3120	0	video	CouchPotato	1	81	0	0	0	5	6	Intervention measure
5425905121	54	259	3121	0	video	CouchPotato	3	95	0	0	0	5	6	Intervention measure
5425905122	54	259	3122	0	video	CouchPotato	1	66	0	0	0	5	6	Intervention measure
5425905124	54	259	3124	0	video	CouchPotato	0	0	0	0	0	5	6	Intervention measure
5425905125	54	259	3125	0	video	CouchPotato	2	85	0	0	0	5	6	Intervention measure
5425905126	54	259	3126	0	video	CouchPotato	1	84	0	0	0	5	6	Intervention measure
5425905128	54	259	3128	0	video	CouchPotato	1	85	0	0	0	5	6	Intervention measure
5425905100	54	259	3100	0	video	Challange	0	0	0	0	0	3	6	Intervention measure
5425905103	54	259	3103	7	video	Challange	0	0	0	0	0	3	6	Intervention measure
5425905104	54	259	3104	0	video	Challange	0	0	0	0	0	3	6	Intervention measure
5425905108	54	259	3108	0	video	Challange	1	2	0	0	0	3	6	Intervention measure
5425905109	54	259	3109	0	video	Challange	0	0	0	0	0	3	6	Intervention measure
5425905111	54	259	3111	7	video	Challange	0	0	0	0	0	3	6	Intervention measure
5425905115	54	259	3115	7	video	Challange	1	84	0	0	0	3	6	Intervention measure
5425905116	54	259	3116	7	video	Challange	5	420	0	0	0	3	6	Intervention measure
5425905118	54	259	3118	0	video	Challange	1	84	0	0	0	3	6	Intervention measure
5425905119	54	259	3119	0	video	Challange	0	0	0	0	0	3	6	Intervention measure
5425905120	54	259	3120	0	video	Challange	1	82	0	0	0	3	6	Intervention measure
5425905121	54	259	3121	0	video	Challange	0	0	0	0	0	3	6	Intervention measure
5425905122	54	259	3122	0	video	Challange	0	0	0	0	0	3	6	Intervention measure
5425905124	54	259	3124	0	video	Challange	0	0	0	0	0	3	6	Intervention measure
5425905125	54	259	3125	0	video	Challange	1	77	0	0	0	3	6	Intervention measure
5425905126	54	259	3126	0	video	Challange	0	0	0	0	0	3	6	Intervention measure
5425905128	54	259	3128	0	video	Challange	4	169	0	0	0	3	6	Intervention measure
5425905100	54	259	3100	0	video	BoysVsGirls	0	0	0	0	0	4	6	Intervention measure
5425905103	54	259	3103	7	video	BoysVsGirls	0	0	0	0	0	4	6	Intervention measure
5425905104	54	259	3104	0	video	BoysVsGirls	0	0	0	0	0	4	6	Intervention measure
5425905108	54	259	3108	0	video	BoysVsGirls	3	72	0	0	0	4	6	Intervention measure
5425905109	54	259	3109	0	video	BoysVsGirls	1	24	0	0	0	4	6	Intervention measure
5425905111	54	259	3111	7	video	BoysVsGirls	0	0	0	0	0	4	6	Intervention measure
5425905115	54	259	3115	7	video	BoysVsGirls	1	24	0	0	0	4	6	Intervention measure
5425905116	54	259	3116	7	video	BoysVsGirls	1	24	0	0	0	4	6	Intervention measure
5425905118	54	259	3118	0	video	BoysVsGirls	1	24	0	0	0	4	6	Intervention measure
5425905119	54	259	3119	0	video	BoysVsGirls	0	0	0	0	0	4	6	Intervention measure
5425905120	54	259	3120	0	video	BoysVsGirls	1	24	0	0	0	4	6	Intervention measure
5425905121	54	259	3121	0	video	BoysVsGirls	3	72	0	0	0	4	6	Intervention measure
5425905122	54	259	3122	0	video	BoysVsGirls	1	24	0	0	0	4	6	Intervention measure
5425905124	54	259	3124	0	video	BoysVsGirls	0	0	0	0	0	4	6	Intervention measure
5425905125	54	259	3125	0	video	BoysVsGirls	2	48	0	0	0	4	6	Intervention measure
5425905126	54	259	3126	0	video	BoysVsGirls	1	24	0	0	0	4	6	Intervention measure
5425905128	54	259	3128	0	video	BoysVsGirls	2	24	0	0	0	4	6	Intervention measure
5830306060	58	303	4060	0	video	BoysVsGirls	1	33	0	0	0	4	6	Intervention measure
5830306062	58	303	4062	0	video	BoysVsGirls	1	33	0	0	0	4	6	Intervention measure
5830306063	58	303	4063	7	video	BoysVsGirls	1	33	0	0	0	4	6	Intervention measure
5830306064	58	303	4064	7	video	BoysVsGirls	1	33	0	0	0	4	6	Intervention measure
5830306065	58	303	4065	0	video	BoysVsGirls	0	0	0	0	0	4	6	Intervention measure
5830306066	58	303	4066	0	video	BoysVsGirls	1	33	0	0	0	4	6	Intervention measure
5830306067	58	303	4067	0	video	BoysVsGirls	2	34	0	0	0	4	6	Intervention measure
5830306068	58	303	4068	7	video	BoysVsGirls	0	0	0	0	0	4	6	Intervention measure
5830306069	58	303	4069	0	video	BoysVsGirls	2	47	0	0	0	4	6	Intervention measure
5830306070	58	303	4070	0	video	BoysVsGirls	3	95	0	0	0	4	6	Intervention measure
5830306071	58	303	4071	0	video	BoysVsGirls	3	99	0	0	0	4	6	Intervention measure
5830306073	58	303	4073	0	video	BoysVsGirls	0	0	0	0	0	4	6	Intervention measure
5830306074	58	303	4074	0	video	BoysVsGirls	9	264	0	0	2	4	6	Intervention measure
5830306075	58	303	4075	0	video	BoysVsGirls	0	0	0	0	0	4	6	Intervention measure
5830306076	58	303	4076	0	video	BoysVsGirls	4	132	0	0	0	4	6	Intervention measure
5830306077	58	303	4077	0	video	BoysVsGirls	0	0	0	0	0	4	6	Intervention measure
5830306078	58	303	4078	0	video	BoysVsGirls	2	63	0	0	0	4	6	Intervention measure
5830306079	58	303	4079	0	video	BoysVsGirls	2	66	0	0	0	4	6	Intervention measure
5830306080	58	303	4080	7	video	BoysVsGirls	1	33	0	0	0	4	6	Intervention measure
5830306081	58	303	4081	0	video	BoysVsGirls	5	135	0	0	0	4	6	Intervention measure
5830306082	58	303	4082	0	video	BoysVsGirls	1	33	0	0	0	4	6	Intervention measure
5830306083	58	303	4083	0	video	BoysVsGirls	0	0	0	0	0	4	6	Intervention measure
5830306084	58	303	4084	0	video	BoysVsGirls	0	0	0	0	0	4	6	Intervention measure
5830306085	58	303	4085	0	video	BoysVsGirls	0	0	0	0	0	4	6	Intervention measure
5830306086	58	303	4086	0	video	BoysVsGirls	2	35	0	0	0	4	6	Intervention measure
5830306088	58	303	4088	0	video	BoysVsGirls	1	33	0	0	0	4	6	Intervention measure
5830306089	58	303	4089	0	video	BoysVsGirls	3	99	0	0	0	4	6	Intervention measure
5830306090	58	303	4090	0	video	BoysVsGirls	2	66	0	0	0	4	6	Intervention measure
5830306060	58	303	4060	0	video	Challange	2	86	0	0	0	3	6	Intervention measure
5830306062	58	303	4062	0	video	Challange	2	64	0	0	0	3	6	Intervention measure
5830306063	58	303	4063	7	video	Challange	7	178	0	0	1	3	6	Intervention measure
5830306064	58	303	4064	7	video	Challange	5	172	0	0	0	3	6	Intervention measure
5830306065	58	303	4065	0	video	Challange	0	0	0	0	0	3	6	Intervention measure
5830306066	58	303	4066	0	video	Challange	5	215	0	0	0	3	6	Intervention measure
5830306067	58	303	4067	0	video	Challange	1	43	0	0	0	3	6	Intervention measure
5830306068	58	303	4068	7	video	Challange	1	43	0	0	0	3	6	Intervention measure
5830306069	58	303	4069	0	video	Challange	1	43	0	0	0	3	6	Intervention measure
5830306070	58	303	4070	0	video	Challange	2	44	0	0	0	3	6	Intervention measure
5830306071	58	303	4071	0	video	Challange	3	87	0	0	0	3	6	Intervention measure
5830306073	58	303	4073	0	video	Challange	0	0	0	0	0	3	6	Intervention measure
5830306074	58	303	4074	0	video	Challange	11	319	0	0	0	3	6	Intervention measure
5830306075	58	303	4075	0	video	Challange	0	0	0	0	0	3	6	Intervention measure
5830306076	58	303	4076	0	video	Challange	4	172	0	0	0	3	6	Intervention measure
5830306077	58	303	4077	0	video	Challange	0	0	0	0	0	3	6	Intervention measure
5830306078	58	303	4078	0	video	Challange	7	259	0	0	0	3	6	Intervention measure
5830306079	58	303	4079	0	video	Challange	3	86	0	0	0	3	6	Intervention measure
5830306080	58	303	4080	7	video	Challange	1	43	0	0	0	3	6	Intervention measure
5830306081	58	303	4081	0	video	Challange	8	205	0	0	0	3	6	Intervention measure
5830306082	58	303	4082	0	video	Challange	2	86	0	0	0	3	6	Intervention measure
5830306083	58	303	4083	0	video	Challange	0	0	0	0	0	3	6	Intervention measure
5830306084	58	303	4084	0	video	Challange	2	50	0	0	0	3	6	Intervention measure
5830306085	58	303	4085	0	video	Challange	1	43	0	0	0	3	6	Intervention measure
5830306086	58	303	4086	0	video	Challange	22	796	0	0	5	3	6	Intervention measure
5830306088	58	303	4088	0	video	Challange	3	129	0	0	0	3	6	Intervention measure
5830306089	58	303	4089	0	video	Challange	0	0	0	0	0	3	6	Intervention measure
5830306090	58	303	4090	0	video	Challange	2	49	0	0	0	3	6	Intervention measure
5830306060	58	303	4060	0	video	CouchPotato	3	111	0	0	0	5	6	Intervention measure
5830306062	58	303	4062	0	video	CouchPotato	1	37	0	0	0	5	6	Intervention measure
5830306063	58	303	4063	7	video	CouchPotato	1	37	0	0	0	5	6	Intervention measure
5830306064	58	303	4064	7	video	CouchPotato	3	111	0	0	0	5	6	Intervention measure
5830306065	58	303	4065	0	video	CouchPotato	0	0	0	0	0	5	6	Intervention measure
5830306066	58	303	4066	0	video	CouchPotato	3	111	0	0	0	5	6	Intervention measure
5830306067	58	303	4067	0	video	CouchPotato	1	37	0	0	0	5	6	Intervention measure
5830306068	58	303	4068	7	video	CouchPotato	4	148	0	0	0	5	6	Intervention measure
5830306069	58	303	4069	0	video	CouchPotato	1	33	0	0	0	5	6	Intervention measure
5830306070	58	303	4070	0	video	CouchPotato	2	38	0	0	0	5	6	Intervention measure
5830306071	58	303	4071	0	video	CouchPotato	2	74	0	0	0	5	6	Intervention measure
5830306073	58	303	4073	0	video	CouchPotato	0	0	0	0	0	5	6	Intervention measure
5830306074	58	303	4074	0	video	CouchPotato	9	216	0	0	2	5	6	Intervention measure
5830306075	58	303	4075	0	video	CouchPotato	0	0	0	0	0	5	6	Intervention measure
5830306076	58	303	4076	0	video	CouchPotato	2	74	0	0	2	5	6	Intervention measure
5830306077	58	303	4077	0	video	CouchPotato	0	0	0	0	0	5	6	Intervention measure
5830306078	58	303	4078	0	video	CouchPotato	3	109	0	0	0	5	6	Intervention measure
5830306079	58	303	4079	0	video	CouchPotato	4	100	0	0	0	5	6	Intervention measure
5830306080	58	303	4080	7	video	CouchPotato	2	74	0	0	0	5	6	Intervention measure
5830306081	58	303	4081	0	video	CouchPotato	3	81	0	0	0	5	6	Intervention measure
5830306082	58	303	4082	0	video	CouchPotato	2	48	0	0	0	5	6	Intervention measure
5830306083	58	303	4083	0	video	CouchPotato	0	0	0	0	0	5	6	Intervention measure
5830306084	58	303	4084	0	video	CouchPotato	0	0	0	0	0	5	6	Intervention measure
5830306085	58	303	4085	0	video	CouchPotato	0	0	0	0	0	5	6	Intervention measure
5830306086	58	303	4086	0	video	CouchPotato	2	40	0	0	0	5	6	Intervention measure
5830306088	58	303	4088	0	video	CouchPotato	1	37	0	0	0	5	6	Intervention measure
5830306089	58	303	4089	0	video	CouchPotato	4	118	0	0	0	5	6	Intervention measure
5830306090	58	303	4090	0	video	CouchPotato	2	74	0	0	0	5	6	Intervention measure
5830306060	58	303	4060	0	video	Motivate	5	209	0	0	0	2	6	Intervention measure
5830306062	58	303	4062	0	video	Motivate	5	244	0	0	0	2	6	Intervention measure
5830306063	58	303	4063	7	video	Motivate	6	312	0	0	1	2	6	Intervention measure
5830306064	58	303	4064	7	video	Motivate	7	359	0	0	0	2	6	Intervention measure
5830306065	58	303	4065	0	video	Motivate	5	226	0	0	0	2	6	Intervention measure
5830306066	58	303	4066	0	video	Motivate	6	309	0	0	0	2	6	Intervention measure
5830306067	58	303	4067	0	video	Motivate	4	129	0	0	0	2	6	Intervention measure
5830306068	58	303	4068	7	video	Motivate	3	106	0	0	1	2	6	Intervention measure
5830306069	58	303	4069	0	video	Motivate	3	124	0	0	0	2	6	Intervention measure
5830306070	58	303	4070	0	video	Motivate	2	28	0	0	0	2	6	Intervention measure
5830306071	58	303	4071	0	video	Motivate	4	208	0	0	0	2	6	Intervention measure
5830306073	58	303	4073	0	video	Motivate	2	104	0	0	0	2	6	Intervention measure
5830306074	58	303	4074	0	video	Motivate	21	612	0	0	1	2	6	Intervention measure
5830306075	58	303	4075	0	video	Motivate	1	52	0	0	0	2	6	Intervention measure
5830306076	58	303	4076	0	video	Motivate	7	328	0	0	0	2	6	Intervention measure
5830306077	58	303	4077	0	video	Motivate	0	0	0	0	0	2	6	Intervention measure
5830306078	58	303	4078	0	video	Motivate	3	154	0	0	0	2	6	Intervention measure
5830306079	58	303	4079	0	video	Motivate	8	311	0	0	0	2	6	Intervention measure
5830306080	58	303	4080	7	video	Motivate	6	214	0	0	0	2	6	Intervention measure
5830306081	58	303	4081	0	video	Motivate	16	731	0	0	0	2	6	Intervention measure
5830306082	58	303	4082	0	video	Motivate	7	261	0	0	0	2	6	Intervention measure
5830306083	58	303	4083	0	video	Motivate	0	0	0	0	0	2	6	Intervention measure
5830306084	58	303	4084	0	video	Motivate	2	53	0	0	0	2	6	Intervention measure
5830306085	58	303	4085	0	video	Motivate	0	0	0	0	0	2	6	Intervention measure
5830306086	58	303	4086	0	video	Motivate	19	988	0	0	2	2	6	Intervention measure
5830306088	58	303	4088	0	video	Motivate	3	107	0	0	0	2	6	Intervention measure
5830306089	58	303	4089	0	video	Motivate	3	104	0	0	0	2	6	Intervention measure
5830306090	58	303	4090	0	video	Motivate	0	0	0	0	0	2	6	Intervention measure
5830306060	58	303	4060	0	video	Voorstel	12	333	0	0	0	0	6	Intervention measure
5830306062	58	303	4062	0	video	Voorstel	4	121	0	0	0	0	6	Intervention measure
5830306063	58	303	4063	7	video	Voorstel	8	214	0	0	0	0	6	Intervention measure
5830306064	58	303	4064	7	video	Voorstel	3	93	0	0	0	0	6	Intervention measure
5830306065	58	303	4065	0	video	Voorstel	8	239	0	0	0	0	6	Intervention measure
5830306066	58	303	4066	0	video	Voorstel	5	154	0	0	0	0	6	Intervention measure
5830306067	58	303	4067	0	video	Voorstel	2	31	0	0	0	0	6	Intervention measure
5830306068	58	303	4068	7	video	Voorstel	5	133	0	0	0	0	6	Intervention measure
5830306069	58	303	4069	0	video	Voorstel	1	31	0	0	0	0	6	Intervention measure
5830306070	58	303	4070	0	video	Voorstel	6	145	0	0	0	0	6	Intervention measure
5830306071	58	303	4071	0	video	Voorstel	6	186	0	0	0	0	6	Intervention measure
5830306073	58	303	4073	0	video	Voorstel	4	119	0	0	0	0	6	Intervention measure
5830306074	58	303	4074	0	video	Voorstel	40	753	0	0	1	0	6	Intervention measure
5830306075	58	303	4075	0	video	Voorstel	1	31	0	0	0	0	6	Intervention measure
5830306076	58	303	4076	0	video	Voorstel	8	234	0	0	1	0	6	Intervention measure
5830306077	58	303	4077	0	video	Voorstel	0	0	0	0	0	0	6	Intervention measure
5830306078	58	303	4078	0	video	Voorstel	4	87	0	0	1	0	6	Intervention measure
5830306079	58	303	4079	0	video	Voorstel	7	133	0	0	0	0	6	Intervention measure
5830306080	58	303	4080	7	video	Voorstel	15	341	0	0	0	0	6	Intervention measure
5830306081	58	303	4081	0	video	Voorstel	19	438	0	0	0	0	6	Intervention measure
5830306082	58	303	4082	0	video	Voorstel	13	322	0	0	0	0	6	Intervention measure
5830306083	58	303	4083	0	video	Voorstel	0	0	0	0	0	0	6	Intervention measure
5830306084	58	303	4084	0	video	Voorstel	4	88	0	0	0	0	6	Intervention measure
5830306085	58	303	4085	0	video	Voorstel	0	0	0	0	0	0	6	Intervention measure
5830306086	58	303	4086	0	video	Voorstel	17	420	0	0	1	0	6	Intervention measure
5830306088	58	303	4088	0	video	Voorstel	10	175	1	0	0	0	6	Intervention measure
5830306089	58	303	4089	0	video	Voorstel	8	230	0	0	0	0	6	Intervention measure
5830306090	58	303	4090	0	video	Voorstel	5	127	0	0	0	0	6	Intervention measure
5830306060	58	303	4060	0	video	YourMovez	7	197	0	0	1	1	6	Intervention measure
5830306062	58	303	4062	0	video	YourMovez	4	120	0	0	0	1	6	Intervention measure
5830306063	58	303	4063	7	video	YourMovez	8	181	0	0	0	1	6	Intervention measure
5830306064	58	303	4064	7	video	YourMovez	5	149	0	0	0	1	6	Intervention measure
5830306065	58	303	4065	0	video	YourMovez	8	195	0	0	0	1	6	Intervention measure
5830306066	58	303	4066	0	video	YourMovez	6	172	0	0	0	1	6	Intervention measure
5830306067	58	303	4067	0	video	YourMovez	4	31	0	0	0	1	6	Intervention measure
5830306068	58	303	4068	7	video	YourMovez	5	111	0	0	1	1	6	Intervention measure
5830306069	58	303	4069	0	video	YourMovez	3	41	0	0	0	1	6	Intervention measure
5830306070	58	303	4070	0	video	YourMovez	3	90	0	0	0	1	6	Intervention measure
5830306071	58	303	4071	0	video	YourMovez	9	236	0	0	0	1	6	Intervention measure
5830306073	58	303	4073	0	video	YourMovez	1	30	0	0	0	1	6	Intervention measure
5830306074	58	303	4074	0	video	YourMovez	17	370	0	0	0	1	6	Intervention measure
5830306075	58	303	4075	0	video	YourMovez	0	0	0	0	0	1	6	Intervention measure
5830306076	58	303	4076	0	video	YourMovez	7	190	0	0	0	1	6	Intervention measure
5830306077	58	303	4077	0	video	YourMovez	1	8	0	0	0	1	6	Intervention measure
5830306078	58	303	4078	0	video	YourMovez	1	24	0	0	0	1	6	Intervention measure
5830306079	58	303	4079	0	video	YourMovez	9	253	0	0	0	1	6	Intervention measure
5830306080	58	303	4080	7	video	YourMovez	NA	NA	NA	NA	NA	1	6	Intervention measure
5830306081	58	303	4081	0	video	YourMovez	18	470	0	0	0	1	6	Intervention measure
5830306082	58	303	4082	0	video	YourMovez	12	315	0	0	0	1	6	Intervention measure
5830306083	58	303	4083	0	video	YourMovez	0	0	0	0	0	1	6	Intervention measure
5830306084	58	303	4084	0	video	YourMovez	2	60	0	0	0	1	6	Intervention measure
5830306085	58	303	4085	0	video	YourMovez	0	0	0	0	0	1	6	Intervention measure
5830306086	58	303	4086	0	video	YourMovez	16	438	0	0	1	1	6	Intervention measure
5830306088	58	303	4088	0	video	YourMovez	7	174	1	0	1	1	6	Intervention measure
5830306089	58	303	4089	0	video	YourMovez	3	90	0	0	0	1	6	Intervention measure
5830306090	58	303	4090	0	video	YourMovez	5	150	0	0	0	1	6	Intervention measure
