# Supplementary material for: Testing a Social Network Intervention Using Vlogs to Promote Physical Activity Among Adolescents: A Randomized Controlled Trial
Source: Front Psychol. 2020 Jan 10;10:2913. doi: 10.3389/fpsyg.2019.02913 (PMC6967297; doi:10.3389/fpsyg.2019.02913)
Supplement: DATA SHEET S1 — Supporting data and syntax. [file Data_Sheet_1.ZIP › Participants_Vlog_intervention.csv]

School	Class	Child	Sex	Condition	Type	Cohort	Age	zBMI	Ath_cov
33	100	282	1	Control	primary	old	11	2,56279643527231	3,35
33	100	262	1	Control	primary	old	11	0,824882273455118	5,1
33	100	263	0	Control	primary	old	11	2,57778682344165	3,7
33	100	278	0	Control	primary	old	12	-0,377221134894188	5,8
33	100	4030	1	Control	primary	old	12	0,474899857598415	4,5
33	100	266	0	Control	primary	old	12	-0,0808115046607722	3,1
33	100	2427	1	Control	primary	old	12	1,17980818152538	4,24442424217023
33	100	277	0	Control	primary	old	12	-0,816039789040266	3,7
33	100	272	1	Control	primary	old	11	-0,117032298065756	5,5
33	100	283	0	Control	primary	old	11	-1,07123728816904	3,4
33	100	2425	0	Control	primary	old	12	-0,53414774764505	4
33	100	271	0	Control	primary	old	12	1,44794595526636	5
33	100	268	0	Control	primary	old	11	0,0606596762101632	4,13487132934652
33	100	1317	0	Control	primary	old	11	-0,759318665325229	5,5
33	100	275	0	Control	primary	old	11	0,950341930587551	5,35
33	100	276	1	Control	primary	old	12	0,445962394657209	4,5
33	100	267	1	Control	primary	old	11	2,23196248447571	4,45
33	100	280	1	Control	primary	old	12	-0,0285214982740484	5,4
33	100	281	0	Control	primary	old	11	-0,0756123197492971	3,8
33	100	270	0	Control	primary	old	11	0,842463209361238	2,9
33	300	3992	0	Control	primary	new	10	0,515899839408567	4,9
33	300	3993	0	Control	primary	new	11	0,669677866073038	3,9
33	300	3980	1	Control	primary	new	10	-0,0274149971739208	5,65
33	300	3984	1	Control	primary	new	11	1,54716323713196	4,4
33	300	3985	0	Control	primary	new	10	-0,144689000105927	5,2
33	300	265	1	Control	primary	new	11	0,851212499027612	5,55192232408857
33	300	3988	0	Control	primary	new	10	0,200148000849779	5,4
33	300	3991	1	Control	primary	new	11	-1,22814407120897	2,7
33	300	3979	1	Control	primary	new	10	0,609326812759948	5
33	300	3982	1	Control	primary	new	10	0,700043674920996	4,3
33	300	3983	0	Control	primary	new	11	-0,012442505036207	5,8
33	300	3972	0	Control	primary	new	10	-0,402523852402388	4,54327094812325
33	300	3973	1	Control	primary	new	10	0,403287378923162	4,9
33	300	3975	1	Control	primary	new	11	1,07658821276943	5
33	300	3981	1	Control	primary	new	10	-1,3922394447799	3,9
33	300	3997	0	Control	primary	new	12	-0,223008295297794	4,7
33	300	3995	0	Control	primary	new	10	0,320890361472485	4,75
33	300	3996	0	Control	primary	new	11	-0,698150781765486	3,8
33	300	3994	1	Control	primary	new	10	0,498160553508635	4,85
33	301	3976	1	Control	primary	new	9	2,15831827483625	4,4
33	301	3999	0	Control	primary	new	9	1,5382621522363	5,1
33	301	4001	0	Control	primary	new	10	-0,106050778421126	4,9
33	301	4011	0	Control	primary	new	9	2,76658655383061	3,3
33	301	4007	0	Control	primary	new	9	1,43032502356024	4,9
33	301	4010	0	Control	primary	new	9	0,771013309252592	2,6
33	301	4012	1	Control	primary	new	9	-0,574488288898873	4,5
33	301	4013	1	Control	primary	new	9	-1,01268116956191	4,65
33	301	4002	0	Control	primary	new	10	-0,76927054991442	3,7
33	301	4003	0	Control	primary	new	9	-0,345755423315722	3,6
33	301	4005	1	Control	primary	new	9	0,52331268535746	4,3
33	301	4006	1	Control	primary	new	10	-0,0256805181183002	4,9
33	301	4021	1	Control	primary	new	9	-0,110210913369631	4
33	301	4023	0	Control	primary	new	9	-0,289591306817335	5,6
33	301	4024	1	Control	primary	new	9	0,588462865225535	2,95
33	301	4025	0	Control	primary	new	9	-0,585535873208819	4,3
33	301	4015	0	Control	primary	new	10	2,76664750724858	5,3
33	301	4016	0	Control	primary	new	10	-0,169967813552548	5,5
33	301	4017	0	Control	primary	new	9	-0,132569337537533	5,2
33	301	4019	0	Control	primary	new	10	0,22415154513302	4,7
33	301	4020	0	Control	primary	new	9	0,186283778723098	5,5
33	301	4028	0	Control	primary	new	10	-1,15476167500372	4,45
33	301	4026	0	Control	primary	new	10	-0,825707218983914	4,1
33	301	4029	0	Control	primary	new	10	1,59925706761455	4,8
34	103	341	1	PA_SNI	primary	old	12	-2,02363285715646	4,3
34	103	340	0	PA_SNI	primary	old	12	-0,698463978366325	3,47362416386066
34	103	342	1	PA_SNI	primary	old	11	-1,89242145172206	4,5
34	103	343	1	PA_SNI	primary	old	11	2,37637348212247	3,4
34	103	339	0	PA_SNI	primary	old	12	0,469036834449826	4,78512862276547
34	103	350	0	PA_SNI	primary	old	11	0,0870521786891658	4,1
34	103	2929	1	PA_SNI	primary	old	12	0,463272695373057	3,8
34	103	352	1	PA_SNI	primary	old	11	-0,0928355181878055	2,87100043927714
34	103	347	0	PA_SNI	primary	old	11	-0,484796390011347	3,6
34	103	344	1	PA_SNI	primary	old	11	-0,0751978081860919	5,1
34	103	348	0	PA_SNI	primary	old	11	1,79684451334136	4,72602248181474
34	103	345	0	PA_SNI	primary	old	12	0,852236442630897	4,89312868844266
34	103	346	0	PA_SNI	primary	old	11	2,16942527895243	3,2
34	103	351	0	PA_SNI	primary	old	12	-0,742343378304728	4,26316248340505
34	103	337	0	PA_SNI	primary	old	11	-0,340455388827224	4,49285377955147
34	103	338	0	PA_SNI	primary	old	11	1,00730731709621	4,1215620712453
34	103	2875	1	PA_SNI	primary	old	11	0,376521120528399	4,45
34	250	2907	0	PA_SNI	primary	new	9	2,0095715524814	3
34	250	2908	1	PA_SNI	primary	new	10	1,75577518686517	3,85
34	250	2905	0	PA_SNI	primary	new	10	-0,0289469378503758	4,65
34	250	2911	1	PA_SNI	primary	new	9	-1,06900570816536	4,1
34	250	2910	1	PA_SNI	primary	new	10	0,182041091357701	3,07711757945695
34	250	2913	1	PA_SNI	primary	new	9	-1,35080896029337	4,2
34	250	2909	0	PA_SNI	primary	new	9	1,10922091580064	4,2
34	250	2906	1	PA_SNI	primary	new	10	-0,636263995012639	3,9
34	251	2916	0	PA_SNI	primary	new	10	-0,395217659039999	5,2
34	251	2920	1	PA_SNI	primary	new	10	-2,84234697570394	5,1
34	251	2921	0	PA_SNI	primary	new	11	0,673401160382321	4,1
34	251	2917	1	PA_SNI	primary	new	10	1,06810300991198	3,75966898918759
34	251	2919	1	PA_SNI	primary	new	11	0,28847591575575	4,4
34	251	2926	1	PA_SNI	primary	new	10	-0,956860263894222	3,1
34	251	2927	0	PA_SNI	primary	new	11	-0,777470482678948	4,1
34	251	2925	0	PA_SNI	primary	new	10	-2,79360393253533	4,15
34	251	2923	0	PA_SNI	primary	new	11	1,40360644680509	2,95
34	251	2922	0	PA_SNI	primary	new	11	0,329275984036322	3
34	251	2915	0	PA_SNI	primary	new	11	-1,44808429866362	4,5
34	251	2924	0	PA_SNI	primary	new	10	-0,380291741347582	4,9
34	251	2918	1	PA_SNI	primary	new	11	2,94	3,3
39	125	902	0	PA_MASS	primary	old	13	1,98438244608787	2,992423178834
39	125	901	0	PA_MASS	primary	old	12	0,974826706318002	4,8
39	125	887	1	PA_MASS	primary	old	11	1,20613093199713	3,95
39	125	904	1	PA_MASS	primary	old	12	-0,680566403301576	6
39	125	900	1	PA_MASS	primary	old	11	0,766016222388216	3,7
39	125	905	1	PA_MASS	primary	old	12	-0,918037769209912	5,21272618358619
39	125	903	0	PA_MASS	primary	old	12	2,25212795325592	4
39	125	886	0	PA_MASS	primary	old	11	1,31040207237821	3,4
39	125	892	1	PA_MASS	primary	old	12	-1,17211394345462	4,07226092879254
39	125	894	0	PA_MASS	primary	old	12	1,55286004544127	4,02069880459644
39	125	890	1	PA_MASS	primary	old	12	1,61355220228402	4,95
39	125	891	0	PA_MASS	primary	old	11	2,47762485042185	3,45
39	125	898	1	PA_MASS	primary	old	11	0,382378564840133	3,5
39	125	899	1	PA_MASS	primary	old	11	0,565233587394845	3,6
39	125	897	1	PA_MASS	primary	old	12	0,350335735938306	4,7956085855972
39	125	906	1	PA_MASS	primary	old	11	-0,647936642259628	3,9
39	125	908	0	PA_MASS	primary	old	11	0,119138337237306	4,3
39	290	3813	1	PA_MASS	primary	new	10	0,359820323020431	4,4
39	290	3812	1	PA_MASS	primary	new	9	1,07977562703063	3
39	290	3797	1	PA_MASS	primary	new	10	0,164759917258857	3,5
39	290	3796	1	PA_MASS	primary	new	10	-0,928982607740878	4,3
39	290	3802	1	PA_MASS	primary	new	9	2,64717082177679	4
39	290	3799	1	PA_MASS	primary	new	9	1,30332910516538	4,2
39	290	3810	1	PA_MASS	primary	new	10	1,86692155031557	4,15
39	290	3801	0	PA_MASS	primary	new	11	0,0829166693051879	4,6
39	290	3806	1	PA_MASS	primary	new	9	2,18108692702834	4,15
39	290	3804	0	PA_MASS	primary	new	10	0,0822286505510839	4,4
39	290	3803	1	PA_MASS	primary	new	10	1,09906886453691	4,7
39	290	3809	1	PA_MASS	primary	new	9	-1,59758446202017	4,55
39	290	3807	1	PA_MASS	primary	new	9	-0,545239607495038	3,2
39	290	3811	1	PA_MASS	primary	new	10	-1,16054929798554	4,7
39	291	3826	1	PA_MASS	primary	new	10	2,19613173317388	4
39	291	3825	0	PA_MASS	primary	new	11	1,82085918539434	4,6
39	291	3823	1	PA_MASS	primary	new	10	-0,41846272037733	4,9
39	291	3816	1	PA_MASS	primary	new	11	1,33719671366795	4,3
39	291	3818	1	PA_MASS	primary	new	12	-2,36211864711011	4,8
39	291	3828	0	PA_MASS	primary	new	10	0,328953420919393	4,15
39	291	3817	1	PA_MASS	primary	new	11	-0,698287863150043	4,9
39	291	3822	1	PA_MASS	primary	new	11	1,17104281433594	4,9
39	291	3830	1	PA_MASS	primary	new	10	0,805058337985957	4,2
39	291	3821	1	PA_MASS	primary	new	10	-0,415823397706357	5,4
39	291	3829	1	PA_MASS	primary	new	10	2,05820789101647	4,4
39	291	3820	0	PA_MASS	primary	new	12	0,722018301377209	5,1
39	291	3824	0	PA_MASS	primary	new	12	1,87308426378037	4
39	291	3831	0	PA_MASS	primary	new	11	-0,729166132313066	5,5
39	291	3833	0	PA_MASS	primary	new	10	0,215898484802758	5,2805636457163
39	291	3832	0	PA_MASS	primary	new	11	0,277068422346096	5,03748886814973
40	131	1145	1	Control	primary	old	11	0,220299569978433	4,65
40	131	2885	0	Control	primary	old	11	0,35715182216733	5,03004044435652
40	131	1149	0	Control	primary	old	11	-0,383398814404676	5,25
40	131	1146	0	Control	primary	old	11	-1,11317677011317	3,32894218291075
40	131	4135	1	Control	primary	old	11	-0,0685999193490284	5,1
40	131	1147	0	Control	primary	old	11	0,509543850364256	3,8
40	131	1154	0	Control	primary	old	11	0,102142864130048	4,35
40	131	1148	0	Control	primary	old	12	-1,31148909077733	4,4
40	131	1152	0	Control	primary	old	11	-1,64355415568719	4,2
40	131	1153	1	Control	primary	old	11	-1,90335611502517	4,65
40	131	4137	1	Control	primary	old	11	-0,312497387808851	4,3
40	131	2884	1	Control	primary	old	11	-0,271269391823729	4,80685829555966
40	131	4138	1	Control	primary	old	12	-0,357386972520126	4,7
40	131	2886	1	Control	primary	old	11	-0,493176223238553	5,25
40	131	1151	0	Control	primary	old	12	-0,501066452459522	4
40	131	1258	0	Control	primary	old	12	-0,857893344447849	4,8
40	131	1150	1	Control	primary	old	12	-1,27211998548332	4,7
40	131	2887	0	Control	primary	old	11	1,20244805850613	4,9
40	131	2888	0	Control	primary	old	11	-0,624506201233628	5,54538896025879
40	131	2889	1	Control	primary	old	11	-0,877555122528186	4,8
40	131	2890	1	Control	primary	old	11	0,0879352374077282	4,2
40	133	1164	0	Control	primary	old	11	1,23115627386374	3,21931609361911
40	133	1263	1	Control	primary	old	12	-0,821978866111825	3,9
40	133	1261	1	Control	primary	old	12	-0,867464115817993	5
40	133	1262	0	Control	primary	old	12	0,193605858034959	2,2
40	133	1165	0	Control	primary	old	11	0,162018173897614	4,56494846807165
40	133	1169	1	Control	primary	old	11	-0,528896195624325	4,83162115451807
40	133	1168	1	Control	primary	old	12	-0,0840139671693784	4,6
40	133	1264	0	Control	primary	old	11	0,0730989179992921	3,36283977092167
40	133	1260	1	Control	primary	old	12	0,726847172329114	3,21715706299984
40	133	1167	1	Control	primary	old	11	-0,907802499369879	4,5
40	133	1162	1	Control	primary	old	12	1,36540921255692	5,41149227005871
40	133	1163	1	Control	primary	old	12	-0,801040429962875	5,5
40	133	1171	0	Control	primary	old	11	1,74330809057563	4,5
40	133	1160	1	Control	primary	old	12	-0,217918084479308	4,5
40	133	1161	0	Control	primary	old	10	0,290267763989449	5,4
40	133	1170	1	Control	primary	old	12	0,0464041612105756	5
40	133	1159	0	Control	primary	old	12	-0,681052957120028	6
40	133	1173	0	Control	primary	old	12	1,596997271853	3,55309821613996
40	133	1174	1	Control	primary	old	13	-0,477364363555249	4,92195435191682
40	133	1175	1	Control	primary	old	11	-1,16124468954417	5,4
40	135	1181	0	Control	primary	old	11	-0,889436871626613	5,3
40	135	1188	0	Control	primary	old	12	-0,835009924283431	5,2
40	135	1180	0	Control	primary	old	11	-0,42863372094894	4,6
40	135	1259	0	Control	primary	old	11	-1,82840392412072	4,6
40	135	1189	1	Control	primary	old	11	-1,62632287302548	4,3
40	135	2881	0	Control	primary	old	11	-0,656809308321959	3,6
40	135	2880	1	Control	primary	old	11	-1,41579908725108	5
40	135	1182	0	Control	primary	old	11	-0,44905807766647	5,85
40	135	1179	1	Control	primary	old	12	0,30376874026284	4,5
40	135	1184	1	Control	primary	old	12	-1,34981614635121	5
40	135	1192	0	Control	primary	old	12	-0,0406842324385942	5,80503209586061
40	135	1177	1	Control	primary	old	11	-2,18506606179739	4
40	135	1178	1	Control	primary	old	11	-0,0111546037664298	4,25
40	135	1183	1	Control	primary	old	13	0,434997209671151	4,8
40	135	1187	1	Control	primary	old	11	1,63905205263952	4,55
40	135	1176	0	Control	primary	old	11	-0,448697179899271	4,8
40	135	1185	0	Control	primary	old	11	0,742048243862177	4,66651995035192
40	135	1186	1	Control	primary	old	11	-1,94013332626748	4,6
40	135	1191	1	Control	primary	old	11	-0,743414434718471	4,8
40	135	1190	1	Control	primary	old	11	0,727770153637615	3,4
42	277	3525	0	PA_MASS	secondary	new	12	1,35063564041696	4,2
42	277	3520	1	PA_MASS	secondary	new	12	1,44211364373785	5,75
42	277	3510	1	PA_MASS	secondary	new	12	-0,0667678698820242	4,45
42	277	3524	1	PA_MASS	secondary	new	12	-0,413621989994426	4,7
42	277	3513	1	PA_MASS	secondary	new	12	2,26225281775615	2,65
42	277	3511	0	PA_MASS	secondary	new	12	0,708436568557283	4,32714446741065
42	277	3526	1	PA_MASS	secondary	new	12	0,583030585656949	4,9
42	277	3531	1	PA_MASS	secondary	new	13	-0,0920750043824476	2,9
42	277	3517	1	PA_MASS	secondary	new	12	0,515530275374946	3,3
42	277	3516	0	PA_MASS	secondary	new	13	-0,332934791766991	4,1
42	277	3527	1	PA_MASS	secondary	new	12	-0,119002880145684	3,9
42	277	3521	1	PA_MASS	secondary	new	13	1,22436324338428	4,65
42	277	3534	1	PA_MASS	secondary	new	12	-0,722367185470753	2
42	279	3567	0	PA_MASS	secondary	new	12	-1,14874500125484	4,85
42	279	3575	0	PA_MASS	secondary	new	12	0,729106206937474	4,2
42	279	3564	0	PA_MASS	secondary	new	12	-0,213663265415982	5,7
42	279	3581	0	PA_MASS	secondary	new	13	-1,24224618488574	4,6
42	279	3582	0	PA_MASS	secondary	new	13	0,130039492484423	4,4
42	279	3573	1	PA_MASS	secondary	new	12	0,142362609321315	4,45
42	279	3563	1	PA_MASS	secondary	new	12	-1,15365492005694	4,75
42	279	3562	1	PA_MASS	secondary	new	12	0,522157708624838	3,1
42	279	3580	0	PA_MASS	secondary	new	12	0,0385114433360074	4,3
42	279	3568	1	PA_MASS	secondary	new	13	-1,04390772799099	4,3
42	279	3571	0	PA_MASS	secondary	new	12	-0,497172519312875	3,15
42	279	3570	0	PA_MASS	secondary	new	12	-1,59269205665089	4,75
42	279	3586	1	PA_MASS	secondary	new	12	-1,61801401377003	4,5
42	279	3572	0	PA_MASS	secondary	new	12	1,95217153289153	2,80086290160307
42	279	3588	1	PA_MASS	secondary	new	12	-2,46169080692121	5,83508730519748
42	279	3561	1	PA_MASS	secondary	new	13	-1,01775998384284	4,7
42	279	3587	0	PA_MASS	secondary	new	12	-0,688890545634691	4,7
42	279	3584	1	PA_MASS	secondary	new	12	0,309488647294562	5,55
42	279	3577	1	PA_MASS	secondary	new	12	0,343840410386896	4,90052272719
43	141	1195	1	Control	primary	old	11	-5,87240757156892	5,4
43	141	1205	0	Control	primary	old	11	1,71813615180874	3,1
43	141	1196	0	Control	primary	old	11	-0,245850703072269	4,15
43	141	1199	0	Control	primary	old	11	-0,907339370219832	4,2
43	141	1200	1	Control	primary	old	11	0,269208903915463	5,4
43	141	1201	0	Control	primary	old	11	-0,94112567743768	2,57208587052336
43	141	1203	1	Control	primary	old	12	1,28902502177155	4,9
43	141	1197	0	Control	primary	old	12	-0,713530376094765	4,85
43	141	1198	1	Control	primary	old	11	-1,01647944609898	4,15443602267455
43	141	2411	0	Control	primary	old	11	-3,33383507320978	4,4
43	141	1211	0	Control	primary	old	13	-0,136656128375423	4,10057482047581
43	141	1218	1	Control	primary	old	11	-0,360151450775581	2,9
43	141	1210	1	Control	primary	old	11	0,872170427360725	4
43	141	1202	1	Control	primary	old	12	1,66567877740214	4,8
43	141	1215	1	Control	primary	old	11	0,823493769839971	3
43	141	1209	0	Control	primary	old	11	0,734420515490326	4,60323501071147
43	141	4056	0	Control	primary	old	12	0,838011045139015	6
43	141	1217	0	Control	primary	old	12	-0,476224190257485	4,54662664185015
54	256	3024	0	PA_SNI	secondary	new	12	-0,809844230355877	1,99138104396817
54	256	3023	0	PA_SNI	secondary	new	12	1,40840004780922	3,9
54	256	3038	1	PA_SNI	secondary	new	12	0,767004750082446	3,85
54	256	3027	1	PA_SNI	secondary	new	12	0,993453151512601	4,5
54	256	3039	0	PA_SNI	secondary	new	12	-1,39707394196283	4,35
54	256	3033	1	PA_SNI	secondary	new	12	-0,612566774079628	4,45
54	256	3022	1	PA_SNI	secondary	new	12	-0,772243342085997	5,4
54	256	3034	1	PA_SNI	secondary	new	12	-0,647268966379147	3,75
54	256	3011	0	PA_SNI	secondary	new	13	-0,552905110905458	5,3
54	256	3012	1	PA_SNI	secondary	new	13	0,36020003068884	2,8
54	256	3028	0	PA_SNI	secondary	new	12	-0,360769376471524	4,7
54	256	3029	1	PA_SNI	secondary	new	12	-0,232440263275564	4,6
54	256	3031	1	PA_SNI	secondary	new	12	-0,470918987822568	4,1
54	256	3032	1	PA_SNI	secondary	new	12	0,467910073630559	2,85
54	256	3018	1	PA_SNI	secondary	new	13	-0,99778363606101	4
54	256	3020	0	PA_SNI	secondary	new	12	0,0126533349686129	4,75
54	256	3037	0	PA_SNI	secondary	new	12	-0,20741263405111	5,35
54	256	3015	1	PA_SNI	secondary	new	12	-0,470731083318232	3,9
54	256	3016	1	PA_SNI	secondary	new	13	0,0771235369433493	2,65
54	256	3013	0	PA_SNI	secondary	new	13	-0,597960728105943	3,15360097572511
54	256	3040	0	PA_SNI	secondary	new	12	0,867306521503935	4,95
54	256	3014	1	PA_SNI	secondary	new	12	-0,154154822092287	4,4
54	256	3017	0	PA_SNI	secondary	new	12	-1,14554652047439	4,6
54	256	3021	0	PA_SNI	secondary	new	12	-0,246775124908883	3,75
54	258	3097	0	PA_SNI	secondary	new	12	0,753676000051161	5,05
54	258	3092	1	PA_SNI	secondary	new	13	-0,951076426853478	4,65
54	258	3098	0	PA_SNI	secondary	new	13	-1,84184091096135	5,7
54	258	3090	1	PA_SNI	secondary	new	13	0,163410103205988	4,1
54	258	3080	1	PA_SNI	secondary	new	11	-0,593215763653213	5,25
54	258	3094	1	PA_SNI	secondary	new	13	-0,780600824843655	4,25
54	258	3079	0	PA_SNI	secondary	new	13	-0,533369306856053	3,75
54	258	3089	0	PA_SNI	secondary	new	13	0,603337790101761	4,4
54	258	3095	1	PA_SNI	secondary	new	12	0,15112306629005	4,2
54	258	3096	1	PA_SNI	secondary	new	12	-0,746376427050783	4,75
54	258	3093	1	PA_SNI	secondary	new	12	-1,38444150851886	4,4
54	258	3075	1	PA_SNI	secondary	new	12	-0,745496260983093	4,3
54	258	3076	0	PA_SNI	secondary	new	12	-0,269843284939418	5
54	258	3078	0	PA_SNI	secondary	new	13	-0,909391889226171	4,8
54	258	3070	1	PA_SNI	secondary	new	13	-0,43275275533028	3,1
54	258	3071	1	PA_SNI	secondary	new	13	-1,44726074381085	4,85
54	258	3086	1	PA_SNI	secondary	new	12	0,220813353193597	5,8
54	258	3087	0	PA_SNI	secondary	new	13	-0,636967627150939	4,7
54	258	3085	0	PA_SNI	secondary	new	12	-0,199302425531697	3,3
54	258	3082	1	PA_SNI	secondary	new	13	0,223191649500672	4,9
54	258	3083	0	PA_SNI	secondary	new	13	0,840050442433712	3,5
54	258	3081	1	PA_SNI	secondary	new	12	-0,361132692702101	4,7
54	258	3084	0	PA_SNI	secondary	new	13	1,06129427566642	2,3
54	258	3099	1	PA_SNI	secondary	new	12	-1,80462518499054	3,7
54	258	3077	0	PA_SNI	secondary	new	12	-0,614195119258564	2,73926779123609
54	259	3100	0	PA_SNI	secondary	new	12	-0,771241429575703	4
54	259	3103	1	PA_SNI	secondary	new	12	-1,46243413303072	3,7
54	259	3120	0	PA_SNI	secondary	new	12	0,0181287213902923	3
54	259	3115	0	PA_SNI	secondary	new	12	0,574323462686293	5,45
54	259	3116	1	PA_SNI	secondary	new	13	-1,08680400152111	2,5
54	259	3119	0	PA_SNI	secondary	new	13	-0,854798821549247	5
54	259	3109	0	PA_SNI	secondary	new	12	0,785088531073226	3,95
54	259	3104	1	PA_SNI	secondary	new	13	-1,11405391145244	5,1
54	259	3108	1	PA_SNI	secondary	new	12	-1,69022972566858	3,2
54	259	3128	0	PA_SNI	secondary	new	12	0,843995524030787	2,55
54	259	3124	1	PA_SNI	secondary	new	12	-0,150924680077175	3
54	259	3121	1	PA_SNI	secondary	new	13	-1,22087581677792	2,35
54	259	3111	0	PA_SNI	secondary	new	12	-0,0290261531620549	4,7
54	259	3126	1	PA_SNI	secondary	new	13	-2,1888483503867	3,6
54	259	3122	1	PA_SNI	secondary	new	12	-1,91699132348322	5,3
54	259	3118	1	PA_SNI	secondary	new	12	0,970825309903713	5,4
54	259	3125	0	PA_SNI	secondary	new	12	-0,384713889358642	4,7
56	296	3864	1	PA_MASS	primary	new	9	1,06486142491352	4,45
56	296	3878	1	PA_MASS	primary	new	9	-1,35694418507508	5,1
56	296	3863	1	PA_MASS	primary	new	10	1,45100951118827	4,65
56	296	3872	1	PA_MASS	primary	new	10	-0,767005348519814	5,4
56	296	3874	1	PA_MASS	primary	new	9	-0,959329496868753	5,4
56	296	3877	0	PA_MASS	primary	new	10	-0,881905127467868	5,5
56	296	3868	1	PA_MASS	primary	new	10	-1,07157190553665	3,85
56	296	3865	0	PA_MASS	primary	new	10	1,08847033253985	5,6
56	296	3867	0	PA_MASS	primary	new	10	1,16497874936155	4
56	296	3887	1	PA_MASS	primary	new	9	-0,964409155966545	4,65
56	296	3869	0	PA_MASS	primary	new	10	0,71051862902752	5,1
56	296	3871	1	PA_MASS	primary	new	10	0,322502594278434	5,5
56	296	3882	1	PA_MASS	primary	new	10	-1,29728717591379	4,9
56	296	3885	0	PA_MASS	primary	new	9	0,911285701855683	3,25
56	296	3879	0	PA_MASS	primary	new	10	-0,0906618826102511	5,8
56	296	3875	1	PA_MASS	primary	new	10	1,79138418529492	5,5
56	296	3880	1	PA_MASS	primary	new	10	-0,298855599303256	5,35
56	296	3886	1	PA_MASS	primary	new	10	1,77872284590307	4,8
56	296	3888	0	PA_MASS	primary	new	9	0,066889234250652	4,7
56	297	3892	0	PA_MASS	primary	new	10	-0,149248020506567	5,1
56	297	3893	1	PA_MASS	primary	new	10	-0,960008056687765	5,8
56	297	3909	1	PA_MASS	primary	new	10	-1,80730172881466	4,7
56	297	3890	0	PA_MASS	primary	new	11	0,837896289460151	5
56	297	3907	0	PA_MASS	primary	new	11	-0,415348339754664	4,25
56	297	3891	0	PA_MASS	primary	new	10	1,96826031696973	4,8239753881649
56	297	3903	0	PA_MASS	primary	new	10	2,14122100276492	4,6
56	297	3906	0	PA_MASS	primary	new	10	0,833571197976178	5,4
56	297	3922	1	PA_MASS	primary	new	11	0,336046009277217	5,3
56	297	3894	1	PA_MASS	primary	new	11	2,10284746391805	3,8
56	297	3896	0	PA_MASS	primary	new	11	2,52808473246269	4,35690405895203
56	297	3897	1	PA_MASS	primary	new	10	0,740898223702297	4,6
56	297	3898	1	PA_MASS	primary	new	11	-0,349302723270988	4,7
56	297	3901	1	PA_MASS	primary	new	11	0,383117414716056	4,3
56	297	3902	0	PA_MASS	primary	new	10	-4,53724493136493	4,3
56	297	3918	1	PA_MASS	primary	new	10	0,1334572787797	5,4
56	297	3905	0	PA_MASS	primary	new	10	1,43361375596727	2,7
56	297	3920	0	PA_MASS	primary	new	10	-0,300785063632395	5,2
56	297	3921	0	PA_MASS	primary	new	11	1,44242697215695	5,3
56	297	3913	1	PA_MASS	primary	new	10	-0,872174907336382	5,6
56	297	3914	1	PA_MASS	primary	new	10	-0,18852649754132	4,65
56	297	3911	1	PA_MASS	primary	new	10	1,81436598049815	4,35
56	297	3916	0	PA_MASS	primary	new	10	-0,612828652134148	4,71957907444497
56	297	3915	1	PA_MASS	primary	new	10	1,12266468745534	6
56	297	3919	1	PA_MASS	primary	new	11	0,757271167179217	5,8
58	303	4062	0	PA_SNI	primary	new	10	-0,478335270811211	4,25
58	303	4060	1	PA_SNI	primary	new	10	0,39794394377535	4,65
58	303	4068	0	PA_SNI	primary	new	10	-0,95913587712051	5,3
58	303	4067	0	PA_SNI	primary	new	10	-1,45005039687962	3,9
58	303	4069	1	PA_SNI	primary	new	10	1,40927732903699	5,45
58	303	4070	1	PA_SNI	primary	new	10	0,897188569030668	3,95
58	303	4071	1	PA_SNI	primary	new	10	0,872487531878282	4,1
58	303	4073	1	PA_SNI	primary	new	10	-1,74569248579738	2
58	303	4074	1	PA_SNI	primary	new	10	-0,91082638968417	3,75
58	303	4075	0	PA_SNI	primary	new	10	0,332774642245079	3,7
58	303	4076	1	PA_SNI	primary	new	10	-0,268457528938029	3,6
58	303	4077	0	PA_SNI	primary	new	10	-1,04756664552153	5,1
58	303	4078	1	PA_SNI	primary	new	10	-0,588669510966443	5,05
58	303	4079	0	PA_SNI	primary	new	10	0,744260142908445	3,3
58	303	4080	1	PA_SNI	primary	new	10	-1,32591579343496	4,45
58	303	4081	1	PA_SNI	primary	new	10	-0,503743253948351	4,65
58	303	4082	1	PA_SNI	primary	new	11	0,588121248826858	3,75
58	303	4084	0	PA_SNI	primary	new	11	0,580532317495268	5,05
58	303	4085	0	PA_SNI	primary	new	11	1,18048191852047	5,4
58	303	4086	0	PA_SNI	primary	new	10	0,44579096692429	3,8
58	303	4088	1	PA_SNI	primary	new	10	-0,548257554160209	3,95
58	303	4089	1	PA_SNI	primary	new	12	-1,62711524047849	4,75
58	303	4090	0	PA_SNI	primary	new	11	0,457576834567421	3,65
58	303	4066	0	PA_SNI	primary	new	10	0,745629550935025	5,25
58	303	4063	1	PA_SNI	primary	new	11	-1,34108134608084	3,8
58	303	4064	0	PA_SNI	primary	new	11	0,764119055507747	5,85
58	303	4065	1	PA_SNI	primary	new	10	0,0392754662089111	3,2
59	304	4091	1	Control	secondary	new	12	0,0134546490031299	3,7
59	304	4093	0	Control	secondary	new	12	-0,68336164422212	4,28114354130853
59	304	4092	1	Control	secondary	new	13	0,893946130000866	3,75
59	304	4094	0	Control	secondary	new	13	0,891275135457092	4,6
59	304	4099	1	Control	secondary	new	13	0,485280111438699	3,7
59	304	4095	0	Control	secondary	new	13	2,18002050475879	4,45
59	304	4097	1	Control	secondary	new	13	1,52134089402012	3,7
59	304	4098	0	Control	secondary	new	14	-0,910635557661823	4,23544479994226
59	305	4101	1	Control	secondary	new	13	-1,29473827720526	2,28871788737203
59	305	4102	0	Control	secondary	new	12	0,58810582857773	3,34996904242966
59	305	4105	0	Control	secondary	new	13	-0,223657151337114	4,1
59	305	4107	1	Control	secondary	new	13	0,703838683543207	4,05
59	305	4103	0	Control	secondary	new	12	2,94118019196137	4
59	305	4108	1	Control	secondary	new	13	-1,01494934357668	4,1
59	306	4112	0	Control	secondary	new	15	-1,7723026083972	4,65
59	306	4114	0	Control	secondary	new	15	-0,198398945857057	4,4
59	306	4117	1	Control	secondary	new	14	-0,431874087357106	3,7
59	306	4116	0	Control	secondary	new	14	0,485881428728772	5
59	306	4115	0	Control	secondary	new	13	2,7540499694608	4,15
59	306	4109	1	Control	secondary	new	13	-1,38234190343504	3,6
59	306	4110	0	Control	secondary	new	14	-0,611272408537904	3,3
59	306	4111	0	Control	secondary	new	14	-1,12121555107039	6
59	306	4119	1	Control	secondary	new	14	1,06394289522229	2,4
59	306	4118	0	Control	secondary	new	14	-0,402505094306813	4
59	307	4128	1	Control	secondary	new	15	-0,221194772518456	4,9
59	307	4129	1	Control	secondary	new	15	0,921369824918188	2
59	307	4124	0	Control	secondary	new	15	1,65082995900727	4,27955718862681
59	307	4127	1	Control	secondary	new	15	-1,95837195808983	4,2
59	307	4130	0	Control	secondary	new	15	0,965427233095499	5,8
59	307	4133	0	Control	secondary	new	15	1,67993980618592	4,1
59	307	4134	1	Control	secondary	new	15	-0,447338602619677	4,4
59	307	4131	0	Control	secondary	new	16	-0,996209657472635	3,5
59	307	4132	1	Control	secondary	new	15	1,19767027260501	4,9
59	307	4120	0	Control	secondary	new	15	0,840228098667614	3,4
59	307	4121	1	Control	secondary	new	16	2,71867904404542	4,2
59	307	4123	1	Control	secondary	new	16	-1,61127061940656	3,9
60	310	4162	0	Control	secondary	new	12	0,277542027876398	5
60	310	4164	0	Control	secondary	new	12	-0,0552556039220525	1,75
60	310	4171	0	Control	secondary	new	12	-0,652472491671714	5,3
60	310	4172	1	Control	secondary	new	12	0,136220542762587	2,85
60	310	4173	1	Control	secondary	new	13	-1,56911180282479	4,5
60	310	4177	1	Control	secondary	new	12	0,951051618845241	5,45
60	310	4178	1	Control	secondary	new	12	-0,876786527912352	4,5
60	310	4179	0	Control	secondary	new	13	0,194260605129846	5,8
60	310	4180	1	Control	secondary	new	13	-1,17431512705831	1,5
60	310	4181	1	Control	secondary	new	13	-1,00371545527155	4,8
60	310	4182	0	Control	secondary	new	12	1,37615262312107	3,65
60	310	4183	1	Control	secondary	new	12	-0,781546769566859	1,55
60	310	4174	1	Control	secondary	new	12	-1,73234863837154	1,65
60	310	4176	1	Control	secondary	new	13	-0,697543361503749	4,3
