# Supplementary material for: Testing a Social Network Intervention Using Vlogs to Promote Physical Activity Among Adolescents: A Randomized Controlled Trial
Source: Front Psychol. 2020 Jan 10;10:2913. doi: 10.3389/fpsyg.2019.02913 (PMC6967297; doi:10.3389/fpsyg.2019.02913)
Supplement: DATA SHEET S1 — Supporting data and syntax. [file Data_Sheet_1.ZIP › Vlog_rating.csv]

Child	Vlog_name	ClassVlog_class	Exposed_subj	Attitude	Day
341	voorstel	heuvel	1	80	0
341	yourmovez	heuvel	1	81	1
342	boysvsgirls	heuvel	0	NA	4
342	challenge	heuvel	1	86	3
342	coutchpotato	heuvel	1	30	5
342	motivate	heuvel	0	NA	2
342	voorstel	heuvel	0	NA	0
342	yourmovez	heuvel	1	60	1
343	motivate	heuvel	0	NA	2
343	voorstel	heuvel	0	NA	0
343	yourmovez	heuvel	0	NA	1
344	boysvsgirls	heuvel	0	NA	4
344	challenge	heuvel	1	100	3
344	coutchpotato	heuvel	1	100	5
344	motivate	heuvel	0	NA	2
344	voorstel	heuvel	0	NA	0
344	yourmovez	heuvel	1	100	1
346	voorstel	heuvel	0	NA	0
346	yourmovez	heuvel	1	88	1
347	voorstel	heuvel	0	NA	0
352	voorstel	heuvel	0	NA	0
352	yourmovez	heuvel	1	100	1
887	boysvsgirls	heuvel	0	NA	4
887	challenge	heuvel	0	NA	3
887	coutchpotato	heuvel	0	NA	5
887	motivate	heuvel	0	NA	2
887	voorstel	heuvel	0	NA	0
887	yourmovez	heuvel	0	NA	1
890	boysvsgirls	heuvel	0	NA	4
890	challenge	heuvel	0	NA	3
890	coutchpotato	heuvel	0	NA	5
890	motivate	heuvel	0	NA	2
890	voorstel	heuvel	1	44	0
890	yourmovez	heuvel	0	NA	1
891	boysvsgirls	heuvel	0	NA	4
891	challenge	heuvel	1	53	3
891	motivate	heuvel	1	0	2
891	voorstel	heuvel	1	100	0
891	yourmovez	heuvel	1	0	1
892	voorstel	heuvel	0	NA	0
894	boysvsgirls	heuvel	1	22	4
894	challenge	heuvel	0	NA	3
894	coutchpotato	heuvel	0	NA	5
894	motivate	heuvel	0	NA	2
894	voorstel	heuvel	0	NA	0
894	yourmovez	heuvel	1	32	1
897	boysvsgirls	heuvel	0	NA	4
897	challenge	heuvel	0	NA	3
897	coutchpotato	heuvel	0	NA	5
897	motivate	heuvel	0	NA	2
897	voorstel	heuvel	0	NA	0
897	yourmovez	heuvel	0	NA	1
898	boysvsgirls	heuvel	0	NA	4
898	challenge	heuvel	0	NA	3
898	coutchpotato	heuvel	0	NA	5
898	motivate	heuvel	1	62	2
898	voorstel	heuvel	0	NA	0
898	yourmovez	heuvel	0	NA	1
899	voorstel	heuvel	0	NA	0
900	boysvsgirls	heuvel	1	100	4
900	challenge	heuvel	1	68	3
900	coutchpotato	heuvel	1	100	5
900	motivate	heuvel	1	69	2
900	voorstel	heuvel	0	NA	0
900	yourmovez	heuvel	1	55	1
902	voorstel	heuvel	0	NA	0
905	voorstel	heuvel	0	NA	0
906	boysvsgirls	heuvel	0	NA	4
906	challenge	heuvel	0	NA	3
906	coutchpotato	heuvel	0	NA	5
906	motivate	heuvel	1	87	2
906	voorstel	heuvel	1	77	0
906	yourmovez	heuvel	1	78	1
908	motivate	heuvel	1	0	2
908	voorstel	heuvel	1	39	0
908	yourmovez	heuvel	1	0	1
2875	challenge	heuvel	0	NA	3
2875	motivate	heuvel	1	100	2
2875	voorstel	heuvel	0	NA	0
2875	yourmovez	heuvel	1	100	1
2905	boysvsgirls	heuvel	1	100	4
2905	challenge	heuvel	1	100	3
2905	coutchpotato	heuvel	1	100	5
2905	motivate	heuvel	1	100	2
2905	voorstel	heuvel	1	100	0
2905	yourmovez	heuvel	1	100	1
2906	challenge	heuvel	1	58	3
2906	motivate	heuvel	1	68	2
2906	voorstel	heuvel	1	76	0
2906	yourmovez	heuvel	1	69	1
2907	boysvsgirls	heuvel	0	NA	4
2907	challenge	heuvel	0	NA	3
2907	coutchpotato	heuvel	0	NA	5
2907	motivate	heuvel	0	NA	2
2907	voorstel	heuvel	1	26	0
2907	yourmovez	heuvel	1	22	1
2908	boysvsgirls	heuvel	0	NA	4
2908	challenge	heuvel	1	100	3
2908	coutchpotato	heuvel	1	100	5
2908	motivate	heuvel	1	100	2
2908	voorstel	heuvel	1	100	0
2908	yourmovez	heuvel	1	100	1
2909	boysvsgirls	heuvel	1	100	4
2909	challenge	heuvel	1	100	3
2909	coutchpotato	heuvel	1	98	5
2909	motivate	heuvel	1	49	2
2909	voorstel	heuvel	0	NA	0
2909	yourmovez	heuvel	1	12	1
2910	boysvsgirls	heuvel	1	0	4
2910	challenge	heuvel	1	0	3
2910	coutchpotato	heuvel	0	NA	5
2910	motivate	heuvel	0	NA	2
2910	voorstel	heuvel	1	0	0
2910	yourmovez	heuvel	1	0	1
2911	boysvsgirls	heuvel	1	5	4
2911	challenge	heuvel	0	NA	3
2911	coutchpotato	heuvel	0	NA	5
2911	motivate	heuvel	0	NA	2
2911	voorstel	heuvel	1	100	0
2911	yourmovez	heuvel	1	8	1
2913	voorstel	heuvel	1	100	0
2915	boysvsgirls	heuvel	1	47	4
2915	challenge	heuvel	0	NA	3
2915	coutchpotato	heuvel	0	NA	5
2915	motivate	heuvel	1	41	2
2915	voorstel	heuvel	1	60	0
2915	yourmovez	heuvel	1	49	1
2916	voorstel	heuvel	0	NA	0
2917	voorstel	heuvel	0	NA	0
2918	boysvsgirls	heuvel	0	NA	4
2918	challenge	heuvel	0	NA	3
2918	coutchpotato	heuvel	0	NA	5
2918	motivate	heuvel	1	74	2
2918	voorstel	heuvel	0	NA	0
2918	yourmovez	heuvel	1	49	1
2919	boysvsgirls	heuvel	0	NA	4
2919	challenge	heuvel	0	NA	3
2919	motivate	heuvel	0	NA	2
2919	voorstel	heuvel	0	NA	0
2919	yourmovez	heuvel	1	69	1
2920	challenge	heuvel	0	NA	3
2920	motivate	heuvel	0	NA	2
2920	voorstel	heuvel	1	33	0
2920	yourmovez	heuvel	1	0	1
2921	boysvsgirls	heuvel	0	NA	4
2921	challenge	heuvel	1	51	3
2921	coutchpotato	heuvel	0	NA	5
2921	motivate	heuvel	1	53	2
2921	voorstel	heuvel	0	NA	0
2921	yourmovez	heuvel	1	49	1
2922	boysvsgirls	heuvel	0	NA	4
2922	challenge	heuvel	1	0	3
2922	coutchpotato	heuvel	0	NA	5
2922	motivate	heuvel	1	38	2
2922	voorstel	heuvel	1	49	0
2922	yourmovez	heuvel	1	26	1
2923	boysvsgirls	heuvel	0	NA	4
2923	challenge	heuvel	0	NA	3
2923	coutchpotato	heuvel	0	NA	5
2923	motivate	heuvel	0	NA	2
2923	voorstel	heuvel	1	0	0
2923	yourmovez	heuvel	1	0	1
2924	boysvsgirls	heuvel	0	NA	4
2924	challenge	heuvel	0	NA	3
2924	coutchpotato	heuvel	1	60	5
2924	motivate	heuvel	0	NA	2
2924	voorstel	heuvel	1	18	0
2924	yourmovez	heuvel	1	41	1
2925	boysvsgirls	heuvel	0	NA	4
2925	challenge	heuvel	0	NA	3
2925	coutchpotato	heuvel	0	NA	5
2925	motivate	heuvel	0	NA	2
2925	voorstel	heuvel	1	27	0
2925	yourmovez	heuvel	0	NA	1
2926	boysvsgirls	heuvel	1	100	4
2926	challenge	heuvel	1	99	3
2926	coutchpotato	heuvel	1	100	5
2926	motivate	heuvel	1	100	2
2926	voorstel	heuvel	1	54	0
2926	yourmovez	heuvel	1	91	1
2927	boysvsgirls	heuvel	0	NA	4
2927	challenge	heuvel	0	NA	3
2927	coutchpotato	heuvel	1	46	5
2927	motivate	heuvel	1	27	2
2927	voorstel	heuvel	1	46	0
2927	yourmovez	heuvel	1	31	1
2929	boysvsgirls	heuvel	1	40	4
2929	challenge	heuvel	1	74	3
2929	coutchpotato	heuvel	1	6	5
2929	motivate	heuvel	1	28	2
2929	voorstel	heuvel	1	31	0
2929	yourmovez	heuvel	1	24	1
3011	boysvsgirls	1C	1	34	4
3011	challenge	1C	0	NA	3
3011	coutchpotato	1C	0	NA	5
3011	motivate	1C	1	53	2
3011	voorstel	1C	1	0	0
3011	yourmovez	1C	1	45	1
3013	boysvsgirls	1C	0	NA	4
3013	challenge	1C	0	NA	3
3013	coutchpotato	1C	0	NA	5
3013	motivate	1C	1	58	2
3013	voorstel	1C	1	50	0
3013	yourmovez	1C	1	42	1
3015	voorstel	1C	0	NA	0
3015	yourmovez	1C	0	NA	1
3016	voorstel	1C	1	93	0
3017	boysvsgirls	1C	1	4	4
3017	challenge	1C	1	1	3
3017	coutchpotato	1C	0	NA	5
3017	motivate	1C	1	1	2
3017	voorstel	1C	1	0	0
3017	yourmovez	1C	1	3	1
3018	voorstel	1C	1	50	0
3018	yourmovez	1C	1	47	1
3020	challenge	1C	1	0	3
3020	motivate	1C	0	NA	2
3020	voorstel	1C	1	0	0
3020	yourmovez	1C	1	0	1
3021	challenge	1C	1	0	3
3021	motivate	1C	1	0	2
3021	voorstel	1C	1	23	0
3021	yourmovez	1C	1	0	1
3023	challenge	1C	1	42	3
3023	motivate	1C	0	NA	2
3023	voorstel	1C	1	67	0
3023	yourmovez	1C	0	NA	1
3024	voorstel	1C	0	NA	0
3028	boysvsgirls	1C	0	NA	4
3028	challenge	1C	0	NA	3
3028	coutchpotato	1C	0	NA	5
3028	motivate	1C	0	NA	2
3028	voorstel	1C	1	71	0
3028	yourmovez	1C	0	NA	1
3029	boysvsgirls	1C	0	NA	4
3029	challenge	1C	0	NA	3
3029	coutchpotato	1C	0	NA	5
3029	motivate	1C	1	100	2
3029	voorstel	1C	1	100	0
3029	yourmovez	1C	0	NA	1
3031	boysvsgirls	1C	1	74	4
3031	challenge	1C	1	77	3
3031	coutchpotato	1C	0	NA	5
3031	motivate	1C	1	85	2
3031	voorstel	1C	1	73	0
3031	yourmovez	1C	1	62	1
3032	boysvsgirls	1C	1	90	4
3032	challenge	1C	1	59	3
3032	coutchpotato	1C	1	70	5
3032	motivate	1C	1	94	2
3032	voorstel	1C	1	100	0
3032	yourmovez	1C	1	91	1
3033	boysvsgirls	1C	0	NA	4
3033	challenge	1C	0	NA	3
3033	coutchpotato	1C	0	NA	5
3033	motivate	1C	0	NA	2
3033	voorstel	1C	1	58	0
3033	yourmovez	1C	0	NA	1
3034	boysvsgirls	1C	0	NA	4
3034	challenge	1C	1	4	3
3034	coutchpotato	1C	1	34	5
3034	motivate	1C	1	53	2
3034	voorstel	1C	1	56	0
3034	yourmovez	1C	0	NA	1
3037	boysvsgirls	1C	0	NA	4
3037	challenge	1C	0	NA	3
3037	coutchpotato	1C	0	NA	5
3037	motivate	1C	0	NA	2
3037	voorstel	1C	1	53	0
3037	yourmovez	1C	0	NA	1
3038	boysvsgirls	1C	0	NA	4
3038	challenge	1C	1	60	3
3038	coutchpotato	1C	0	NA	5
3038	motivate	1C	0	NA	2
3038	voorstel	1C	0	NA	0
3038	yourmovez	1C	0	NA	1
3039	boysvsgirls	1C	1	100	4
3039	challenge	1C	1	100	3
3039	coutchpotato	1C	1	100	5
3039	motivate	1C	1	100	2
3039	voorstel	1C	1	100	0
3039	yourmovez	1C	1	100	1
3040	challenge	1C	1	19	3
3040	motivate	1C	1	86	2
3040	voorstel	1C	1	22	0
3040	yourmovez	1C	0	NA	1
3070	boysvsgirls	1E	1	77	4
3070	challenge	1E	0	NA	3
3070	coutchpotato	1E	1	100	5
3070	motivate	1E	1	53	2
3070	voorstel	1E	1	52	0
3070	yourmovez	1E	1	86	1
3071	boysvsgirls	1E	1	100	4
3071	challenge	1E	0	NA	3
3071	coutchpotato	1E	1	68	5
3071	motivate	1E	1	92	2
3071	voorstel	1E	1	80	0
3071	yourmovez	1E	1	99	1
3075	boysvsgirls	1E	1	72	4
3075	challenge	1E	1	49	3
3075	coutchpotato	1E	1	68	5
3075	motivate	1E	0	NA	2
3075	voorstel	1E	1	10	0
3075	yourmovez	1E	1	91	1
3076	boysvsgirls	1E	1	75	4
3076	challenge	1E	1	52	3
3076	coutchpotato	1E	1	60	5
3076	motivate	1E	1	63	2
3076	voorstel	1E	1	45	0
3076	yourmovez	1E	1	65	1
3077	voorstel	1E	1	48	0
3077	yourmovez	1E	1	70	1
3078	boysvsgirls	1E	0	NA	4
3078	challenge	1E	0	NA	3
3078	coutchpotato	1E	1	71	5
3078	motivate	1E	0	NA	2
3078	voorstel	1E	1	54	0
3078	yourmovez	1E	1	60	1
3079	boysvsgirls	1E	0	NA	4
3079	challenge	1E	0	NA	3
3079	coutchpotato	1E	0	NA	5
3079	motivate	1E	0	NA	2
3079	voorstel	1E	0	NA	0
3079	yourmovez	1E	0	NA	1
3080	boysvsgirls	1E	0	NA	4
3080	challenge	1E	0	NA	3
3080	coutchpotato	1E	1	86	5
3080	motivate	1E	0	NA	2
3080	voorstel	1E	1	77	0
3080	yourmovez	1E	1	77	1
3081	boysvsgirls	1E	0	NA	4
3081	challenge	1E	0	NA	3
3081	coutchpotato	1E	0	NA	5
3081	motivate	1E	1	63	2
3081	voorstel	1E	0	NA	0
3081	yourmovez	1E	0	NA	1
3082	boysvsgirls	1E	1	42	4
3082	challenge	1E	0	NA	3
3082	coutchpotato	1E	1	32	5
3082	motivate	1E	0	NA	2
3082	voorstel	1E	1	42	0
3082	yourmovez	1E	1	55	1
3084	boysvsgirls	1E	0	NA	4
3084	challenge	1E	0	NA	3
3084	coutchpotato	1E	0	NA	5
3084	motivate	1E	0	NA	2
3084	voorstel	1E	1	55	0
3084	yourmovez	1E	0	NA	1
3085	boysvsgirls	1E	0	NA	4
3085	challenge	1E	0	NA	3
3085	coutchpotato	1E	0	NA	5
3085	motivate	1E	0	NA	2
3085	voorstel	1E	1	54	0
3085	yourmovez	1E	0	NA	1
3086	motivate	1E	1	46	2
3086	voorstel	1E	0	NA	0
3086	yourmovez	1E	0	NA	1
3089	boysvsgirls	1E	0	NA	4
3089	challenge	1E	0	NA	3
3089	coutchpotato	1E	0	NA	5
3089	motivate	1E	0	NA	2
3089	voorstel	1E	0	NA	0
3089	yourmovez	1E	0	NA	1
3090	boysvsgirls	1E	0	NA	4
3090	challenge	1E	1	66	3
3090	coutchpotato	1E	0	NA	5
3090	motivate	1E	1	62	2
3090	voorstel	1E	1	78	0
3090	yourmovez	1E	0	NA	1
3092	boysvsgirls	1E	0	NA	4
3092	challenge	1E	1	37	3
3092	coutchpotato	1E	1	70	5
3092	motivate	1E	1	75	2
3092	voorstel	1E	1	70	0
3092	yourmovez	1E	0	NA	1
3093	boysvsgirls	1E	1	57	4
3093	challenge	1E	1	16	3
3093	coutchpotato	1E	0	NA	5
3093	motivate	1E	1	48	2
3093	voorstel	1E	0	NA	0
3093	yourmovez	1E	0	NA	1
3094	boysvsgirls	1E	0	NA	4
3094	challenge	1E	0	NA	3
3094	coutchpotato	1E	0	NA	5
3094	motivate	1E	1	57	2
3094	voorstel	1E	0	NA	0
3094	yourmovez	1E	1	81	1
3095	boysvsgirls	1E	1	66	4
3095	challenge	1E	1	69	3
3095	coutchpotato	1E	0	NA	5
3095	motivate	1E	1	74	2
3095	voorstel	1E	1	77	0
3095	yourmovez	1E	1	84	1
3096	boysvsgirls	1E	1	61	4
3096	challenge	1E	0	NA	3
3096	coutchpotato	1E	1	54	5
3096	motivate	1E	1	63	2
3096	voorstel	1E	0	NA	0
3096	yourmovez	1E	1	73	1
3097	boysvsgirls	1E	0	NA	4
3097	challenge	1E	0	NA	3
3097	coutchpotato	1E	0	NA	5
3097	motivate	1E	0	NA	2
3097	voorstel	1E	0	NA	0
3097	yourmovez	1E	0	NA	1
3098	boysvsgirls	1E	0	NA	4
3098	challenge	1E	1	75	3
3098	coutchpotato	1E	1	72	5
3098	motivate	1E	0	NA	2
3098	voorstel	1E	1	70	0
3098	yourmovez	1E	1	76	1
3099	boysvsgirls	1E	0	NA	4
3099	challenge	1E	1	57	3
3099	coutchpotato	1E	0	NA	5
3099	motivate	1E	1	50	2
3099	voorstel	1E	1	68	0
3099	yourmovez	1E	1	96	1
3103	boysvsgirls	1F	1	100	4
3103	challenge	1F	0	NA	3
3103	coutchpotato	1F	1	100	5
3103	motivate	1F	1	79	2
3103	voorstel	1F	1	100	0
3103	yourmovez	1F	1	70	1
3108	boysvsgirls	1F	1	64	4
3108	challenge	1F	1	100	3
3108	coutchpotato	1F	1	100	5
3108	motivate	1F	1	67	2
3108	voorstel	1F	0	NA	0
3108	yourmovez	1F	1	100	1
3109	boysvsgirls	1F	1	41	4
3109	challenge	1F	0	NA	3
3109	coutchpotato	1F	0	NA	5
3109	motivate	1F	0	NA	2
3109	voorstel	1F	0	NA	0
3109	yourmovez	1F	0	NA	1
3111	voorstel	1F	1	46	0
3111	yourmovez	1F	1	56	1
3115	boysvsgirls	1F	1	49	4
3115	challenge	1F	1	46	3
3115	motivate	1F	0	NA	2
3115	voorstel	1F	1	70	0
3115	yourmovez	1F	1	100	1
3116	boysvsgirls	1F	1	100	4
3116	challenge	1F	0	NA	3
3116	coutchpotato	1F	1	100	5
3116	motivate	1F	0	NA	2
3116	voorstel	1F	0	NA	0
3116	yourmovez	1F	0	NA	1
3118	boysvsgirls	1F	0	NA	4
3118	challenge	1F	0	NA	3
3118	coutchpotato	1F	1	46	5
3118	motivate	1F	1	86	2
3118	voorstel	1F	0	NA	0
3118	yourmovez	1F	0	NA	1
3120	boysvsgirls	1F	1	94	4
3120	challenge	1F	1	100	3
3120	coutchpotato	1F	1	45	5
3120	motivate	1F	1	88	2
3120	voorstel	1F	1	53	0
3120	yourmovez	1F	1	100	1
3121	boysvsgirls	1F	0	NA	4
3121	challenge	1F	0	NA	3
3121	coutchpotato	1F	1	35	5
3121	motivate	1F	0	NA	2
3121	voorstel	1F	0	NA	0
3121	yourmovez	1F	1	44	1
3122	boysvsgirls	1F	0	NA	4
3122	challenge	1F	0	NA	3
3122	coutchpotato	1F	0	NA	5
3122	motivate	1F	0	NA	2
3122	voorstel	1F	0	NA	0
3122	yourmovez	1F	0	NA	1
3124	voorstel	1F	0	NA	0
3124	yourmovez	1F	0	NA	1
3125	boysvsgirls	1F	0	NA	4
3125	challenge	1F	0	NA	3
3125	coutchpotato	1F	0	NA	5
3125	motivate	1F	0	NA	2
3125	voorstel	1F	1	86	0
3125	yourmovez	1F	0	NA	1
3126	boysvsgirls	1F	0	NA	4
3126	challenge	1F	0	NA	3
3126	motivate	1F	0	NA	2
3126	voorstel	1F	0	NA	0
3126	yourmovez	1F	0	NA	1
3128	boysvsgirls	1F	0	NA	4
3128	challenge	1F	1	76	3
3128	coutchpotato	1F	1	24	5
3128	motivate	1F	0	NA	2
3128	voorstel	1F	1	100	0
3128	yourmovez	1F	1	100	1
3510	boysvsgirls	1C	0	NA	4
3510	challenge	1C	0	NA	3
3510	coutchpotato	1C	1	45	5
3510	motivate	1C	0	NA	2
3510	voorstel	1C	0	NA	0
3510	yourmovez	1C	0	NA	1
3513	boysvsgirls	1C	0	NA	4
3513	challenge	1C	0	NA	3
3513	coutchpotato	1C	0	NA	5
3513	motivate	1C	0	NA	2
3513	voorstel	1C	0	NA	0
3513	yourmovez	1C	0	NA	1
3517	boysvsgirls	1C	0	NA	4
3517	challenge	1C	0	NA	3
3517	coutchpotato	1C	0	NA	5
3517	motivate	1C	0	NA	2
3517	voorstel	1C	0	NA	0
3517	yourmovez	1C	0	NA	1
3520	boysvsgirls	1C	0	NA	4
3520	challenge	1C	0	NA	3
3520	coutchpotato	1C	0	NA	5
3520	motivate	1C	0	NA	2
3520	voorstel	1C	0	NA	0
3520	yourmovez	1C	0	NA	1
3521	boysvsgirls	1C	0	NA	4
3521	challenge	1C	0	NA	3
3521	coutchpotato	1C	0	NA	5
3521	motivate	1C	0	NA	2
3521	voorstel	1C	0	NA	0
3521	yourmovez	1C	0	NA	1
3524	voorstel	1C	1	0	0
3524	yourmovez	1C	0	NA	1
3525	boysvsgirls	1C	0	NA	4
3525	challenge	1C	0	NA	3
3525	coutchpotato	1C	0	NA	5
3525	motivate	1C	0	NA	2
3525	voorstel	1C	0	NA	0
3525	yourmovez	1C	0	NA	1
3526	boysvsgirls	1C	0	NA	4
3526	challenge	1C	0	NA	3
3526	coutchpotato	1C	0	NA	5
3526	motivate	1C	0	NA	2
3526	voorstel	1C	0	NA	0
3526	yourmovez	1C	0	NA	1
3527	boysvsgirls	1C	0	NA	4
3527	challenge	1C	0	NA	3
3527	coutchpotato	1C	0	NA	5
3527	motivate	1C	0	NA	2
3527	voorstel	1C	0	NA	0
3527	yourmovez	1C	0	NA	1
3531	boysvsgirls	1C	0	NA	4
3531	challenge	1C	0	NA	3
3531	motivate	1C	0	NA	2
3531	voorstel	1C	0	NA	0
3531	yourmovez	1C	0	NA	1
3534	boysvsgirls	1C	0	NA	4
3534	challenge	1C	0	NA	3
3534	coutchpotato	1C	0	NA	5
3534	motivate	1C	0	NA	2
3534	voorstel	1C	0	NA	0
3534	yourmovez	1C	0	NA	1
3561	motivate	1E	0	NA	2
3561	voorstel	1E	0	NA	0
3561	yourmovez	1E	0	NA	1
3562	boysvsgirls	1E	1	15	4
3562	challenge	1E	0	NA	3
3562	coutchpotato	1E	0	NA	5
3562	motivate	1E	0	NA	2
3562	voorstel	1E	0	NA	0
3562	yourmovez	1E	0	NA	1
3563	boysvsgirls	1E	0	NA	4
3563	challenge	1E	0	NA	3
3563	coutchpotato	1E	1	62	5
3563	motivate	1E	1	64	2
3563	voorstel	1E	1	54	0
3563	yourmovez	1E	1	58	1
3564	voorstel	1E	0	NA	0
3564	yourmovez	1E	0	NA	1
3567	boysvsgirls	1E	0	NA	4
3567	challenge	1E	0	NA	3
3567	coutchpotato	1E	0	NA	5
3567	motivate	1E	0	NA	2
3567	voorstel	1E	0	NA	0
3567	yourmovez	1E	0	NA	1
3568	challenge	1E	0	NA	3
3568	motivate	1E	0	NA	2
3568	voorstel	1E	0	NA	0
3568	yourmovez	1E	0	NA	1
3570	boysvsgirls	1E	0	NA	4
3570	challenge	1E	0	NA	3
3570	motivate	1E	0	NA	2
3570	voorstel	1E	0	NA	0
3570	yourmovez	1E	0	NA	1
3571	boysvsgirls	1E	0	NA	4
3571	challenge	1E	0	NA	3
3571	coutchpotato	1E	0	NA	5
3571	motivate	1E	0	NA	2
3571	voorstel	1E	0	NA	0
3571	yourmovez	1E	0	NA	1
3573	boysvsgirls	1E	1	100	4
3573	challenge	1E	0	NA	3
3573	coutchpotato	1E	0	NA	5
3573	motivate	1E	1	100	2
3573	voorstel	1E	0	NA	0
3573	yourmovez	1E	0	NA	1
3575	boysvsgirls	1E	0	NA	4
3575	challenge	1E	0	NA	3
3575	motivate	1E	0	NA	2
3575	voorstel	1E	0	NA	0
3575	yourmovez	1E	1	40	1
3577	voorstel	1E	0	NA	0
3580	boysvsgirls	1E	0	NA	4
3580	challenge	1E	0	NA	3
3580	coutchpotato	1E	0	NA	5
3580	motivate	1E	0	NA	2
3580	voorstel	1E	0	NA	0
3580	yourmovez	1E	0	NA	1
3581	boysvsgirls	1E	0	NA	4
3581	challenge	1E	1	48	3
3581	coutchpotato	1E	0	NA	5
3581	motivate	1E	0	NA	2
3581	voorstel	1E	0	NA	0
3581	yourmovez	1E	0	NA	1
3582	boysvsgirls	1E	0	NA	4
3582	challenge	1E	0	NA	3
3582	coutchpotato	1E	0	NA	5
3582	motivate	1E	0	NA	2
3582	voorstel	1E	0	NA	0
3582	yourmovez	1E	0	NA	1
3584	motivate	1E	0	NA	2
3584	voorstel	1E	0	NA	0
3584	yourmovez	1E	0	NA	1
3586	boysvsgirls	1E	0	NA	4
3586	challenge	1E	0	NA	3
3586	coutchpotato	1E	1	100	5
3586	motivate	1E	0	NA	2
3586	voorstel	1E	1	80	0
3586	yourmovez	1E	0	NA	1
3587	boysvsgirls	1E	1	100	4
3587	challenge	1E	1	59	3
3587	coutchpotato	1E	1	68	5
3587	motivate	1E	0	NA	2
3587	voorstel	1E	0	NA	0
3587	yourmovez	1E	0	NA	1
3588	boysvsgirls	1E	0	NA	4
3588	challenge	1E	0	NA	3
3588	coutchpotato	1E	1	49	5
3588	motivate	1E	0	NA	2
3588	voorstel	1E	0	NA	0
3588	yourmovez	1E	0	NA	1
3796	boysvsgirls	heuvel	1	12	4
3796	challenge	heuvel	1	9	3
3796	coutchpotato	heuvel	0	NA	5
3796	motivate	heuvel	1	60	2
3796	voorstel	heuvel	1	50	0
3796	yourmovez	heuvel	1	15	1
3797	boysvsgirls	heuvel	0	NA	4
3797	challenge	heuvel	0	NA	3
3797	coutchpotato	heuvel	0	NA	5
3797	motivate	heuvel	0	NA	2
3797	voorstel	heuvel	0	NA	0
3797	yourmovez	heuvel	0	NA	1
3799	boysvsgirls	heuvel	0	NA	4
3799	challenge	heuvel	0	NA	3
3799	coutchpotato	heuvel	0	NA	5
3799	motivate	heuvel	0	NA	2
3799	voorstel	heuvel	0	NA	0
3799	yourmovez	heuvel	1	60	1
3801	boysvsgirls	heuvel	0	NA	4
3801	challenge	heuvel	0	NA	3
3801	motivate	heuvel	1	69	2
3801	voorstel	heuvel	1	0	0
3801	yourmovez	heuvel	0	NA	1
3802	boysvsgirls	heuvel	1	100	4
3802	challenge	heuvel	1	95	3
3802	coutchpotato	heuvel	1	100	5
3802	motivate	heuvel	1	100	2
3802	voorstel	heuvel	0	NA	0
3802	yourmovez	heuvel	1	100	1
3803	boysvsgirls	heuvel	0	NA	4
3803	challenge	heuvel	0	NA	3
3803	coutchpotato	heuvel	1	0	5
3803	motivate	heuvel	1	0	2
3803	voorstel	heuvel	1	0	0
3803	yourmovez	heuvel	1	48	1
3804	boysvsgirls	heuvel	1	62	4
3804	challenge	heuvel	1	0	3
3804	coutchpotato	heuvel	1	0	5
3804	motivate	heuvel	1	0	2
3804	voorstel	heuvel	1	0	0
3804	yourmovez	heuvel	1	0	1
3806	boysvsgirls	heuvel	0	NA	4
3806	challenge	heuvel	0	NA	3
3806	coutchpotato	heuvel	0	NA	5
3806	motivate	heuvel	0	NA	2
3806	voorstel	heuvel	0	NA	0
3806	yourmovez	heuvel	0	NA	1
3807	boysvsgirls	heuvel	0	NA	4
3807	challenge	heuvel	0	NA	3
3807	coutchpotato	heuvel	0	NA	5
3807	motivate	heuvel	0	NA	2
3807	voorstel	heuvel	0	NA	0
3807	yourmovez	heuvel	1	3	1
3809	boysvsgirls	heuvel	0	NA	4
3809	challenge	heuvel	0	NA	3
3809	coutchpotato	heuvel	0	NA	5
3809	motivate	heuvel	0	NA	2
3809	voorstel	heuvel	0	NA	0
3809	yourmovez	heuvel	0	NA	1
3810	boysvsgirls	heuvel	0	NA	4
3810	challenge	heuvel	0	NA	3
3810	coutchpotato	heuvel	0	NA	5
3810	motivate	heuvel	1	43	2
3810	voorstel	heuvel	1	51	0
3810	yourmovez	heuvel	1	51	1
3811	boysvsgirls	heuvel	1	61	4
3811	challenge	heuvel	1	33	3
3811	coutchpotato	heuvel	1	66	5
3811	motivate	heuvel	1	30	2
3811	voorstel	heuvel	1	53	0
3811	yourmovez	heuvel	1	36	1
3812	boysvsgirls	heuvel	0	NA	4
3812	challenge	heuvel	0	NA	3
3812	coutchpotato	heuvel	0	NA	5
3812	motivate	heuvel	0	NA	2
3812	voorstel	heuvel	1	46	0
3812	yourmovez	heuvel	0	NA	1
3813	boysvsgirls	heuvel	0	NA	4
3813	challenge	heuvel	1	45	3
3813	coutchpotato	heuvel	0	NA	5
3813	motivate	heuvel	0	NA	2
3813	voorstel	heuvel	0	NA	0
3813	yourmovez	heuvel	1	48	1
3816	boysvsgirls	heuvel	1	4	4
3816	challenge	heuvel	1	5	3
3816	coutchpotato	heuvel	0	NA	5
3816	motivate	heuvel	0	NA	2
3816	voorstel	heuvel	0	NA	0
3816	yourmovez	heuvel	0	NA	1
3817	boysvsgirls	heuvel	0	NA	4
3817	challenge	heuvel	1	97	3
3817	coutchpotato	heuvel	0	NA	5
3817	motivate	heuvel	1	18	2
3817	voorstel	heuvel	0	NA	0
3817	yourmovez	heuvel	1	43	1
3818	boysvsgirls	heuvel	1	100	4
3818	challenge	heuvel	0	NA	3
3818	coutchpotato	heuvel	0	NA	5
3818	motivate	heuvel	1	56	2
3818	voorstel	heuvel	0	NA	0
3818	yourmovez	heuvel	1	100	1
3820	boysvsgirls	heuvel	1	39	4
3820	challenge	heuvel	1	0	3
3820	coutchpotato	heuvel	0	NA	5
3820	motivate	heuvel	0	NA	2
3820	voorstel	heuvel	0	NA	0
3820	yourmovez	heuvel	1	24	1
3821	boysvsgirls	heuvel	0	NA	4
3821	challenge	heuvel	1	59	3
3821	coutchpotato	heuvel	1	57	5
3821	motivate	heuvel	1	55	2
3821	voorstel	heuvel	1	54	0
3821	yourmovez	heuvel	1	48	1
3822	boysvsgirls	heuvel	0	NA	4
3822	challenge	heuvel	0	NA	3
3822	coutchpotato	heuvel	0	NA	5
3822	motivate	heuvel	0	NA	2
3822	voorstel	heuvel	0	NA	0
3822	yourmovez	heuvel	1	51	1
3823	boysvsgirls	heuvel	0	NA	4
3823	challenge	heuvel	1	70	3
3823	coutchpotato	heuvel	1	25	5
3823	motivate	heuvel	1	95	2
3823	voorstel	heuvel	1	50	0
3823	yourmovez	heuvel	1	60	1
3825	boysvsgirls	heuvel	0	NA	4
3825	challenge	heuvel	0	NA	3
3825	coutchpotato	heuvel	0	NA	5
3825	motivate	heuvel	0	NA	2
3825	voorstel	heuvel	0	NA	0
3825	yourmovez	heuvel	1	41	1
3826	boysvsgirls	heuvel	0	NA	4
3826	challenge	heuvel	0	NA	3
3826	motivate	heuvel	1	3	2
3826	voorstel	heuvel	1	7	0
3826	yourmovez	heuvel	0	NA	1
3828	boysvsgirls	heuvel	1	0	4
3828	challenge	heuvel	1	0	3
3828	coutchpotato	heuvel	0	NA	5
3828	motivate	heuvel	1	0	2
3828	voorstel	heuvel	1	7	0
3828	yourmovez	heuvel	1	0	1
3829	boysvsgirls	heuvel	0	NA	4
3829	challenge	heuvel	0	NA	3
3829	coutchpotato	heuvel	1	7	5
3829	motivate	heuvel	1	13	2
3829	voorstel	heuvel	1	37	0
3829	yourmovez	heuvel	1	22	1
3830	boysvsgirls	heuvel	0	NA	4
3830	challenge	heuvel	1	42	3
3830	coutchpotato	heuvel	0	NA	5
3830	motivate	heuvel	1	45	2
3830	voorstel	heuvel	0	NA	0
3830	yourmovez	heuvel	1	42	1
3831	boysvsgirls	heuvel	0	NA	4
3831	challenge	heuvel	0	NA	3
3831	coutchpotato	heuvel	1	47	5
3831	motivate	heuvel	0	NA	2
3831	voorstel	heuvel	0	NA	0
3831	yourmovez	heuvel	0	NA	1
3832	challenge	heuvel	0	NA	3
3832	motivate	heuvel	1	36	2
3832	voorstel	heuvel	0	NA	0
3832	yourmovez	heuvel	0	NA	1
3833	boysvsgirls	heuvel	0	NA	4
3833	challenge	heuvel	0	NA	3
3833	coutchpotato	heuvel	0	NA	5
3833	motivate	heuvel	0	NA	2
3833	voorstel	heuvel	0	NA	0
3833	yourmovez	heuvel	0	NA	1
3863	challenge	wegwijzer	0	NA	3
3863	motivate	wegwijzer	0	NA	2
3863	voorstel	wegwijzer	1	48	0
3863	yourmovez	wegwijzer	0	NA	1
3864	boysvsgirls	wegwijzer	0	NA	4
3864	challenge	wegwijzer	0	NA	3
3864	coutchpotato	wegwijzer	0	NA	5
3864	motivate	wegwijzer	1	70	2
3864	voorstel	wegwijzer	1	46	0
3864	yourmovez	wegwijzer	1	27	1
3865	boysvsgirls	wegwijzer	0	NA	4
3865	challenge	wegwijzer	0	NA	3
3865	coutchpotato	wegwijzer	0	NA	5
3865	motivate	wegwijzer	0	NA	2
3865	voorstel	wegwijzer	0	NA	0
3865	yourmovez	wegwijzer	0	NA	1
3867	motivate	wegwijzer	0	NA	2
3867	voorstel	wegwijzer	1	100	0
3867	yourmovez	wegwijzer	0	NA	1
3868	boysvsgirls	wegwijzer	1	0	4
3868	challenge	wegwijzer	1	0	3
3868	coutchpotato	wegwijzer	1	0	5
3868	motivate	wegwijzer	0	NA	2
3868	voorstel	wegwijzer	0	NA	0
3868	yourmovez	wegwijzer	1	0	1
3869	voorstel	wegwijzer	0	NA	0
3871	motivate	wegwijzer	0	NA	2
3871	voorstel	wegwijzer	1	100	0
3871	yourmovez	wegwijzer	1	100	1
3872	voorstel	wegwijzer	0	NA	0
3872	yourmovez	wegwijzer	1	5	1
3875	motivate	wegwijzer	1	100	2
3875	voorstel	wegwijzer	1	100	0
3875	yourmovez	wegwijzer	1	50	1
3877	boysvsgirls	wegwijzer	0	NA	4
3877	challenge	wegwijzer	0	NA	3
3877	coutchpotato	wegwijzer	0	NA	5
3877	motivate	wegwijzer	0	NA	2
3877	voorstel	wegwijzer	0	NA	0
3877	yourmovez	wegwijzer	0	NA	1
3878	boysvsgirls	wegwijzer	1	0	4
3878	challenge	wegwijzer	1	0	3
3878	coutchpotato	wegwijzer	1	0	5
3878	motivate	wegwijzer	1	71	2
3878	voorstel	wegwijzer	1	51	0
3878	yourmovez	wegwijzer	1	53	1
3879	boysvsgirls	wegwijzer	1	41	4
3879	challenge	wegwijzer	1	35	3
3879	coutchpotato	wegwijzer	1	75	5
3879	motivate	wegwijzer	1	52	2
3879	voorstel	wegwijzer	0	NA	0
3879	yourmovez	wegwijzer	0	NA	1
3880	challenge	wegwijzer	0	NA	3
3880	motivate	wegwijzer	0	NA	2
3880	voorstel	wegwijzer	1	99	0
3880	yourmovez	wegwijzer	0	NA	1
3882	boysvsgirls	wegwijzer	0	NA	4
3882	challenge	wegwijzer	0	NA	3
3882	coutchpotato	wegwijzer	0	NA	5
3882	motivate	wegwijzer	0	NA	2
3882	voorstel	wegwijzer	0	NA	0
3882	yourmovez	wegwijzer	1	1	1
3885	boysvsgirls	wegwijzer	1	0	4
3885	challenge	wegwijzer	1	0	3
3885	coutchpotato	wegwijzer	1	0	5
3885	motivate	wegwijzer	1	0	2
3885	voorstel	wegwijzer	0	NA	0
3885	yourmovez	wegwijzer	1	13	1
3886	boysvsgirls	wegwijzer	0	NA	4
3886	challenge	wegwijzer	0	NA	3
3886	coutchpotato	wegwijzer	1	85	5
3886	motivate	wegwijzer	0	NA	2
3886	voorstel	wegwijzer	0	NA	0
3886	yourmovez	wegwijzer	1	76	1
3887	motivate	wegwijzer	1	70	2
3887	voorstel	wegwijzer	0	NA	0
3887	yourmovez	wegwijzer	1	71	1
3888	voorstel	wegwijzer	0	NA	0
3890	boysvsgirls	wegwijzer	0	NA	4
3890	challenge	wegwijzer	0	NA	3
3890	coutchpotato	wegwijzer	0	NA	5
3890	motivate	wegwijzer	1	42	2
3890	voorstel	wegwijzer	1	43	0
3890	yourmovez	wegwijzer	1	18	1
3891	voorstel	wegwijzer	0	NA	0
3892	boysvsgirls	wegwijzer	0	NA	4
3892	challenge	wegwijzer	1	0	3
3892	coutchpotato	wegwijzer	0	NA	5
3892	motivate	wegwijzer	1	0	2
3892	voorstel	wegwijzer	0	NA	0
3892	yourmovez	wegwijzer	1	0	1
3893	boysvsgirls	wegwijzer	0	NA	4
3893	challenge	wegwijzer	0	NA	3
3893	coutchpotato	wegwijzer	0	NA	5
3893	motivate	wegwijzer	0	NA	2
3893	voorstel	wegwijzer	0	NA	0
3893	yourmovez	wegwijzer	0	NA	1
3894	boysvsgirls	wegwijzer	0	NA	4
3894	challenge	wegwijzer	0	NA	3
3894	coutchpotato	wegwijzer	0	NA	5
3894	motivate	wegwijzer	0	NA	2
3894	voorstel	wegwijzer	0	NA	0
3894	yourmovez	wegwijzer	1	50	1
3897	motivate	wegwijzer	0	NA	2
3897	voorstel	wegwijzer	0	NA	0
3897	yourmovez	wegwijzer	0	NA	1
3898	boysvsgirls	wegwijzer	1	82	4
3898	challenge	wegwijzer	1	100	3
3898	coutchpotato	wegwijzer	0	NA	5
3898	motivate	wegwijzer	0	NA	2
3898	voorstel	wegwijzer	1	84	0
3898	yourmovez	wegwijzer	1	79	1
3901	boysvsgirls	wegwijzer	1	29	4
3901	challenge	wegwijzer	1	59	3
3901	coutchpotato	wegwijzer	1	24	5
3901	motivate	wegwijzer	1	63	2
3901	voorstel	wegwijzer	1	34	0
3901	yourmovez	wegwijzer	1	31	1
3902	boysvsgirls	wegwijzer	0	NA	4
3902	challenge	wegwijzer	0	NA	3
3902	coutchpotato	wegwijzer	0	NA	5
3902	motivate	wegwijzer	0	NA	2
3902	voorstel	wegwijzer	1	29	0
3902	yourmovez	wegwijzer	0	NA	1
3903	boysvsgirls	wegwijzer	0	NA	4
3903	challenge	wegwijzer	0	NA	3
3903	coutchpotato	wegwijzer	0	NA	5
3903	motivate	wegwijzer	0	NA	2
3903	voorstel	wegwijzer	1	62	0
3903	yourmovez	wegwijzer	1	45	1
3905	boysvsgirls	wegwijzer	0	NA	4
3905	challenge	wegwijzer	0	NA	3
3905	coutchpotato	wegwijzer	0	NA	5
3905	motivate	wegwijzer	1	51	2
3905	voorstel	wegwijzer	1	30	0
3905	yourmovez	wegwijzer	1	0	1
3906	boysvsgirls	wegwijzer	0	NA	4
3906	challenge	wegwijzer	1	55	3
3906	coutchpotato	wegwijzer	1	51	5
3906	motivate	wegwijzer	1	44	2
3906	voorstel	wegwijzer	0	NA	0
3906	yourmovez	wegwijzer	1	55	1
3907	boysvsgirls	wegwijzer	1	0	4
3907	coutchpotato	wegwijzer	1	0	5
3907	motivate	wegwijzer	1	19	2
3907	voorstel	wegwijzer	1	0	0
3907	yourmovez	wegwijzer	1	29	1
3909	boysvsgirls	wegwijzer	0	NA	4
3909	challenge	wegwijzer	1	33	3
3909	coutchpotato	wegwijzer	0	NA	5
3909	motivate	wegwijzer	1	48	2
3909	voorstel	wegwijzer	0	NA	0
3909	yourmovez	wegwijzer	0	NA	1
3911	boysvsgirls	wegwijzer	1	27	4
3911	challenge	wegwijzer	1	50	3
3911	coutchpotato	wegwijzer	1	45	5
3911	motivate	wegwijzer	1	16	2
3911	voorstel	wegwijzer	0	NA	0
3911	yourmovez	wegwijzer	0	NA	1
3913	boysvsgirls	wegwijzer	1	0	4
3913	challenge	wegwijzer	1	35	3
3913	coutchpotato	wegwijzer	1	0	5
3913	motivate	wegwijzer	1	0	2
3913	voorstel	wegwijzer	1	48	0
3913	yourmovez	wegwijzer	1	0	1
3914	boysvsgirls	wegwijzer	0	NA	4
3914	challenge	wegwijzer	0	NA	3
3914	coutchpotato	wegwijzer	1	54	5
3914	motivate	wegwijzer	0	NA	2
3914	voorstel	wegwijzer	0	NA	0
3914	yourmovez	wegwijzer	1	45	1
3915	voorstel	wegwijzer	0	NA	0
3915	yourmovez	wegwijzer	1	51	1
3916	voorstel	wegwijzer	0	NA	0
3916	yourmovez	wegwijzer	0	NA	1
3918	voorstel	wegwijzer	1	56	0
3919	boysvsgirls	wegwijzer	0	NA	4
3919	challenge	wegwijzer	1	0	3
3919	coutchpotato	wegwijzer	0	NA	5
3919	motivate	wegwijzer	1	46	2
3919	voorstel	wegwijzer	0	NA	0
3919	yourmovez	wegwijzer	0	NA	1
3920	voorstel	wegwijzer	0	NA	0
3921	voorstel	wegwijzer	0	NA	0
3921	yourmovez	wegwijzer	0	NA	1
3922	boysvsgirls	wegwijzer	0	NA	4
3922	challenge	wegwijzer	0	NA	3
3922	coutchpotato	wegwijzer	1	56	5
3922	motivate	wegwijzer	1	70	2
3922	voorstel	wegwijzer	1	50	0
3922	yourmovez	wegwijzer	1	44	1
4060	boysvsgirls	wegwijzer	1	46	4
4060	challenge	wegwijzer	1	56	3
4060	coutchpotato	wegwijzer	1	64	5
4060	motivate	wegwijzer	1	48	2
4060	voorstel	wegwijzer	1	83	0
4060	yourmovez	wegwijzer	1	57	1
4062	boysvsgirls	wegwijzer	1	66	4
4062	challenge	wegwijzer	0	NA	3
4062	coutchpotato	wegwijzer	1	62	5
4062	motivate	wegwijzer	1	78	2
4062	voorstel	wegwijzer	1	51	0
4062	yourmovez	wegwijzer	1	40	1
4063	boysvsgirls	wegwijzer	1	100	4
4063	challenge	wegwijzer	1	100	3
4063	coutchpotato	wegwijzer	1	100	5
4063	motivate	wegwijzer	1	100	2
4063	voorstel	wegwijzer	1	100	0
4063	yourmovez	wegwijzer	1	100	1
4064	boysvsgirls	wegwijzer	1	95	4
4064	challenge	wegwijzer	1	91	3
4064	coutchpotato	wegwijzer	0	NA	5
4064	motivate	wegwijzer	1	67	2
4064	voorstel	wegwijzer	1	100	0
4064	yourmovez	wegwijzer	1	23	1
4065	motivate	wegwijzer	1	100	2
4065	voorstel	wegwijzer	1	98	0
4065	yourmovez	wegwijzer	1	100	1
4066	boysvsgirls	wegwijzer	1	52	4
4066	challenge	wegwijzer	1	99	3
4066	coutchpotato	wegwijzer	1	65	5
4066	motivate	wegwijzer	1	69	2
4066	voorstel	wegwijzer	0	NA	0
4066	yourmovez	wegwijzer	1	77	1
4067	boysvsgirls	wegwijzer	1	73	4
4067	challenge	wegwijzer	1	73	3
4067	coutchpotato	wegwijzer	1	69	5
4067	motivate	wegwijzer	1	83	2
4067	voorstel	wegwijzer	1	71	0
4067	yourmovez	wegwijzer	1	66	1
4068	boysvsgirls	wegwijzer	1	84	4
4068	challenge	wegwijzer	1	89	3
4068	coutchpotato	wegwijzer	0	NA	5
4068	motivate	wegwijzer	1	93	2
4068	voorstel	wegwijzer	1	100	0
4068	yourmovez	wegwijzer	1	99	1
4069	boysvsgirls	wegwijzer	0	NA	4
4069	challenge	wegwijzer	1	20	3
4069	coutchpotato	wegwijzer	0	NA	5
4069	motivate	wegwijzer	1	67	2
4069	voorstel	wegwijzer	1	35	0
4069	yourmovez	wegwijzer	1	47	1
4070	boysvsgirls	wegwijzer	0	NA	4
4070	challenge	wegwijzer	0	NA	3
4070	coutchpotato	wegwijzer	0	NA	5
4070	motivate	wegwijzer	1	100	2
4070	voorstel	wegwijzer	1	64	0
4070	yourmovez	wegwijzer	1	98	1
4071	boysvsgirls	wegwijzer	1	97	4
4071	challenge	wegwijzer	0	NA	3
4071	coutchpotato	wegwijzer	1	90	5
4071	motivate	wegwijzer	1	100	2
4071	voorstel	wegwijzer	1	100	0
4071	yourmovez	wegwijzer	1	100	1
4073	voorstel	wegwijzer	1	60	0
4073	yourmovez	wegwijzer	0	NA	1
4074	boysvsgirls	wegwijzer	1	64	4
4074	challenge	wegwijzer	1	100	3
4074	coutchpotato	wegwijzer	1	100	5
4074	motivate	wegwijzer	1	100	2
4074	voorstel	wegwijzer	1	100	0
4074	yourmovez	wegwijzer	1	100	1
4075	voorstel	wegwijzer	1	40	0
4075	yourmovez	wegwijzer	1	21	1
4076	boysvsgirls	wegwijzer	1	30	4
4076	challenge	wegwijzer	0	NA	3
4076	coutchpotato	wegwijzer	1	30	5
4076	motivate	wegwijzer	1	83	2
4076	voorstel	wegwijzer	1	100	0
4076	yourmovez	wegwijzer	1	86	1
4077	challenge	wegwijzer	0	NA	3
4077	motivate	wegwijzer	1	34	2
4077	voorstel	wegwijzer	0	NA	0
4077	yourmovez	wegwijzer	0	NA	1
4078	boysvsgirls	wegwijzer	1	100	4
4078	challenge	wegwijzer	1	100	3
4078	coutchpotato	wegwijzer	1	100	5
4078	motivate	wegwijzer	1	100	2
4078	voorstel	wegwijzer	1	100	0
4078	yourmovez	wegwijzer	0	NA	1
4079	boysvsgirls	wegwijzer	0	NA	4
4079	challenge	wegwijzer	0	NA	3
4079	coutchpotato	wegwijzer	0	NA	5
4079	motivate	wegwijzer	1	100	2
4079	voorstel	wegwijzer	0	NA	0
4079	yourmovez	wegwijzer	1	77	1
4080	boysvsgirls	wegwijzer	1	94	4
4080	challenge	wegwijzer	1	92	3
4080	coutchpotato	wegwijzer	0	NA	5
4080	motivate	wegwijzer	1	97	2
4080	voorstel	wegwijzer	1	100	0
4080	yourmovez	wegwijzer	1	99	1
4081	boysvsgirls	wegwijzer	1	85	4
4081	challenge	wegwijzer	1	94	3
4081	coutchpotato	wegwijzer	1	95	5
4081	motivate	wegwijzer	1	44	2
4081	voorstel	wegwijzer	1	60	0
4081	yourmovez	wegwijzer	1	98	1
4082	boysvsgirls	wegwijzer	0	NA	4
4082	challenge	wegwijzer	1	51	3
4082	coutchpotato	wegwijzer	1	65	5
4082	motivate	wegwijzer	1	69	2
4082	voorstel	wegwijzer	1	59	0
4082	yourmovez	wegwijzer	1	60	1
4084	boysvsgirls	wegwijzer	0	NA	4
4084	challenge	wegwijzer	1	0	3
4084	motivate	wegwijzer	1	0	2
4084	voorstel	wegwijzer	1	17	0
4084	yourmovez	wegwijzer	1	27	1
4085	motivate	wegwijzer	1	0	2
4085	voorstel	wegwijzer	0	NA	0
4085	yourmovez	wegwijzer	1	28	1
4086	boysvsgirls	wegwijzer	1	100	4
4086	challenge	wegwijzer	1	100	3
4086	coutchpotato	wegwijzer	1	100	5
4086	motivate	wegwijzer	1	100	2
4086	voorstel	wegwijzer	1	100	0
4086	yourmovez	wegwijzer	1	100	1
4088	boysvsgirls	wegwijzer	1	100	4
4088	challenge	wegwijzer	1	100	3
4088	coutchpotato	wegwijzer	1	68	5
4088	motivate	wegwijzer	1	100	2
4088	voorstel	wegwijzer	1	100	0
4088	yourmovez	wegwijzer	1	100	1
4089	boysvsgirls	wegwijzer	1	100	4
4089	challenge	wegwijzer	1	100	3
4089	coutchpotato	wegwijzer	1	100	5
4089	motivate	wegwijzer	1	100	2
4089	voorstel	wegwijzer	1	68	0
4089	yourmovez	wegwijzer	1	100	1
4090	boysvsgirls	wegwijzer	0	NA	4
4090	challenge	wegwijzer	1	100	3
4090	coutchpotato	wegwijzer	0	NA	5
4090	motivate	wegwijzer	1	68	2
4090	voorstel	wegwijzer	0	NA	0
4090	yourmovez	wegwijzer	1	71	1
