# Supplementary material for: Testing a Social Network Intervention Using Vlogs to Promote Physical Activity Among Adolescents: A Randomized Controlled Trial
Source: Front Psychol. 2020 Jan 10;10:2913. doi: 10.3389/fpsyg.2019.02913 (PMC6967297; doi:10.3389/fpsyg.2019.02913)
Supplement: DATA SHEET S1 — Supporting data and syntax. [file Data_Sheet_1.ZIP › Vloggers.csv]

Child	Vlog_Inclusion_Other_Self_circles	Vlog_evaluation_fun	Vlog_evaluation_attractive	Vlog_evaluation_appealing	Vlog_evaluation_convincing	Vlog_evaluation_interesting	Vlog_evaluation_behavior_change	Vlog_evaluation_behavior_change_class	Vlog_evaluation_motivation	Vlog_evaluation_ability
-1098	NA	NA	NA	NA	NA	NA	NA	NA	NA	NA
-1096	NA	NA	NA	NA	NA	NA	NA	NA	NA	NA
-1093	NA	NA	NA	NA	NA	NA	NA	NA	NA	NA
-1092	NA	NA	NA	NA	NA	NA	NA	NA	NA	NA
-1091	NA	NA	NA	NA	NA	NA	NA	NA	NA	NA
-1075	NA	NA	NA	NA	NA	NA	NA	NA	NA	NA
-1065	NA	NA	NA	NA	NA	NA	NA	NA	NA	NA
-1064	NA	NA	NA	NA	NA	NA	NA	NA	NA	NA
-1058	NA	NA	NA	NA	NA	NA	NA	NA	NA	NA
-1056	NA	NA	NA	NA	NA	NA	NA	NA	NA	NA
-1053	NA	NA	NA	NA	NA	NA	NA	NA	NA	NA
-1051	NA	NA	NA	NA	NA	NA	NA	NA	NA	NA
-1048	NA	NA	NA	NA	NA	NA	NA	NA	NA	NA
-1047	NA	NA	NA	NA	NA	NA	NA	NA	NA	NA
-1043	NA	NA	NA	NA	NA	NA	NA	NA	NA	NA
-1020	NA	NA	NA	NA	NA	NA	NA	NA	NA	NA
-1008	NA	NA	NA	NA	NA	NA	NA	NA	NA	NA
-1005	NA	NA	NA	NA	NA	NA	NA	NA	NA	NA
-1004	NA	NA	NA	NA	NA	NA	NA	NA	NA	NA
-1003	NA	NA	NA	NA	NA	NA	NA	NA	NA	NA
-1002	NA	NA	NA	NA	NA	NA	NA	NA	NA	NA
-997	NA	NA	NA	NA	NA	NA	NA	NA	NA	NA
-996	NA	NA	NA	NA	NA	NA	NA	NA	NA	NA
-994	NA	NA	NA	NA	NA	NA	NA	NA	NA	NA
-980	NA	NA	NA	NA	NA	NA	NA	NA	NA	NA
-975	NA	NA	NA	NA	NA	NA	NA	NA	NA	NA
-974	NA	NA	NA	NA	NA	NA	NA	NA	NA	NA
-973	NA	NA	NA	NA	NA	NA	NA	NA	NA	NA
-971	NA	NA	NA	NA	NA	NA	NA	NA	NA	NA
-970	NA	NA	NA	NA	NA	NA	NA	NA	NA	NA
-967	NA	NA	NA	NA	NA	NA	NA	NA	NA	NA
-964	NA	NA	NA	NA	NA	NA	NA	NA	NA	NA
-963	NA	NA	NA	NA	NA	NA	NA	NA	NA	NA
-959	NA	NA	NA	NA	NA	NA	NA	NA	NA	NA
-954	NA	NA	NA	NA	NA	NA	NA	NA	NA	NA
-953	NA	NA	NA	NA	NA	NA	NA	NA	NA	NA
-951	NA	NA	NA	NA	NA	NA	NA	NA	NA	NA
-950	NA	NA	NA	NA	NA	NA	NA	NA	NA	NA
-945	NA	NA	NA	NA	NA	NA	NA	NA	NA	NA
-944	NA	NA	NA	NA	NA	NA	NA	NA	NA	NA
-942	NA	NA	NA	NA	NA	NA	NA	NA	NA	NA
-940	NA	NA	NA	NA	NA	NA	NA	NA	NA	NA
-931	NA	NA	NA	NA	NA	NA	NA	NA	NA	NA
-930	NA	NA	NA	NA	NA	NA	NA	NA	NA	NA
-926	NA	NA	NA	NA	NA	NA	NA	NA	NA	NA
-921	NA	NA	NA	NA	NA	NA	NA	NA	NA	NA
-918	NA	NA	NA	NA	NA	NA	NA	NA	NA	NA
-917	NA	NA	NA	NA	NA	NA	NA	NA	NA	NA
-916	NA	NA	NA	NA	NA	NA	NA	NA	NA	NA
-915	NA	NA	NA	NA	NA	NA	NA	NA	NA	NA
-913	NA	NA	NA	NA	NA	NA	NA	NA	NA	NA
-911	NA	NA	NA	NA	NA	NA	NA	NA	NA	NA
-908	NA	NA	NA	NA	NA	NA	NA	NA	NA	NA
-906	NA	NA	NA	NA	NA	NA	NA	NA	NA	NA
-904	NA	NA	NA	NA	NA	NA	NA	NA	NA	NA
-900	NA	NA	NA	NA	NA	NA	NA	NA	NA	NA
-898	NA	NA	NA	NA	NA	NA	NA	NA	NA	NA
-894	NA	NA	NA	NA	NA	NA	NA	NA	NA	NA
-890	NA	NA	NA	NA	NA	NA	NA	NA	NA	NA
-889	NA	NA	NA	NA	NA	NA	NA	NA	NA	NA
-882	NA	NA	NA	NA	NA	NA	NA	NA	NA	NA
-880	NA	NA	NA	NA	NA	NA	NA	NA	NA	NA
-877	NA	NA	NA	NA	NA	NA	NA	NA	NA	NA
-876	NA	NA	NA	NA	NA	NA	NA	NA	NA	NA
-875	NA	NA	NA	NA	NA	NA	NA	NA	NA	NA
-870	NA	NA	NA	NA	NA	NA	NA	NA	NA	NA
-864	NA	NA	NA	NA	NA	NA	NA	NA	NA	NA
-861	NA	NA	NA	NA	NA	NA	NA	NA	NA	NA
-858	NA	NA	NA	NA	NA	NA	NA	NA	NA	NA
-857	NA	NA	NA	NA	NA	NA	NA	NA	NA	NA
-846	NA	NA	NA	NA	NA	NA	NA	NA	NA	NA
-844	NA	NA	NA	NA	NA	NA	NA	NA	NA	NA
-843	NA	NA	NA	NA	NA	NA	NA	NA	NA	NA
-842	NA	NA	NA	NA	NA	NA	NA	NA	NA	NA
-841	NA	NA	NA	NA	NA	NA	NA	NA	NA	NA
-838	NA	NA	NA	NA	NA	NA	NA	NA	NA	NA
-834	NA	NA	NA	NA	NA	NA	NA	NA	NA	NA
-833	NA	NA	NA	NA	NA	NA	NA	NA	NA	NA
-827	NA	NA	NA	NA	NA	NA	NA	NA	NA	NA
-826	NA	NA	NA	NA	NA	NA	NA	NA	NA	NA
-825	NA	NA	NA	NA	NA	NA	NA	NA	NA	NA
-823	NA	NA	NA	NA	NA	NA	NA	NA	NA	NA
-821	NA	NA	NA	NA	NA	NA	NA	NA	NA	NA
-820	NA	NA	NA	NA	NA	NA	NA	NA	NA	NA
-817	NA	NA	NA	NA	NA	NA	NA	NA	NA	NA
-815	NA	NA	NA	NA	NA	NA	NA	NA	NA	NA
-813	NA	NA	NA	NA	NA	NA	NA	NA	NA	NA
-812	NA	NA	NA	NA	NA	NA	NA	NA	NA	NA
-809	NA	NA	NA	NA	NA	NA	NA	NA	NA	NA
-808	NA	NA	NA	NA	NA	NA	NA	NA	NA	NA
-805	NA	NA	NA	NA	NA	NA	NA	NA	NA	NA
-804	NA	NA	NA	NA	NA	NA	NA	NA	NA	NA
-803	NA	NA	NA	NA	NA	NA	NA	NA	NA	NA
-799	NA	NA	NA	NA	NA	NA	NA	NA	NA	NA
-798	NA	NA	NA	NA	NA	NA	NA	NA	NA	NA
-795	NA	NA	NA	NA	NA	NA	NA	NA	NA	NA
-794	NA	NA	NA	NA	NA	NA	NA	NA	NA	NA
-793	NA	NA	NA	NA	NA	NA	NA	NA	NA	NA
-791	NA	NA	NA	NA	NA	NA	NA	NA	NA	NA
-789	NA	NA	NA	NA	NA	NA	NA	NA	NA	NA
-786	NA	NA	NA	NA	NA	NA	NA	NA	NA	NA
-785	NA	NA	NA	NA	NA	NA	NA	NA	NA	NA
-782	NA	NA	NA	NA	NA	NA	NA	NA	NA	NA
-778	NA	NA	NA	NA	NA	NA	NA	NA	NA	NA
-776	NA	NA	NA	NA	NA	NA	NA	NA	NA	NA
-775	NA	NA	NA	NA	NA	NA	NA	NA	NA	NA
-774	NA	NA	NA	NA	NA	NA	NA	NA	NA	NA
-773	NA	NA	NA	NA	NA	NA	NA	NA	NA	NA
-770	NA	NA	NA	NA	NA	NA	NA	NA	NA	NA
-769	NA	NA	NA	NA	NA	NA	NA	NA	NA	NA
-768	NA	NA	NA	NA	NA	NA	NA	NA	NA	NA
-767	NA	NA	NA	NA	NA	NA	NA	NA	NA	NA
-766	NA	NA	NA	NA	NA	NA	NA	NA	NA	NA
-764	NA	NA	NA	NA	NA	NA	NA	NA	NA	NA
-763	NA	NA	NA	NA	NA	NA	NA	NA	NA	NA
-762	NA	NA	NA	NA	NA	NA	NA	NA	NA	NA
-761	NA	NA	NA	NA	NA	NA	NA	NA	NA	NA
-759	NA	NA	NA	NA	NA	NA	NA	NA	NA	NA
-758	NA	NA	NA	NA	NA	NA	NA	NA	NA	NA
-756	NA	NA	NA	NA	NA	NA	NA	NA	NA	NA
-754	NA	NA	NA	NA	NA	NA	NA	NA	NA	NA
-750	NA	NA	NA	NA	NA	NA	NA	NA	NA	NA
-741	NA	NA	NA	NA	NA	NA	NA	NA	NA	NA
-740	NA	NA	NA	NA	NA	NA	NA	NA	NA	NA
-739	NA	NA	NA	NA	NA	NA	NA	NA	NA	NA
-737	NA	NA	NA	NA	NA	NA	NA	NA	NA	NA
-736	NA	NA	NA	NA	NA	NA	NA	NA	NA	NA
-734	NA	NA	NA	NA	NA	NA	NA	NA	NA	NA
-732	NA	NA	NA	NA	NA	NA	NA	NA	NA	NA
-731	NA	NA	NA	NA	NA	NA	NA	NA	NA	NA
-730	NA	NA	NA	NA	NA	NA	NA	NA	NA	NA
-727	NA	NA	NA	NA	NA	NA	NA	NA	NA	NA
-725	NA	NA	NA	NA	NA	NA	NA	NA	NA	NA
-724	NA	NA	NA	NA	NA	NA	NA	NA	NA	NA
-722	NA	NA	NA	NA	NA	NA	NA	NA	NA	NA
-721	NA	NA	NA	NA	NA	NA	NA	NA	NA	NA
-715	NA	NA	NA	NA	NA	NA	NA	NA	NA	NA
-712	NA	NA	NA	NA	NA	NA	NA	NA	NA	NA
-711	NA	NA	NA	NA	NA	NA	NA	NA	NA	NA
-709	NA	NA	NA	NA	NA	NA	NA	NA	NA	NA
-706	NA	NA	NA	NA	NA	NA	NA	NA	NA	NA
-704	NA	NA	NA	NA	NA	NA	NA	NA	NA	NA
-703	NA	NA	NA	NA	NA	NA	NA	NA	NA	NA
-702	NA	NA	NA	NA	NA	NA	NA	NA	NA	NA
-701	NA	NA	NA	NA	NA	NA	NA	NA	NA	NA
-700	NA	NA	NA	NA	NA	NA	NA	NA	NA	NA
-698	NA	NA	NA	NA	NA	NA	NA	NA	NA	NA
-692	NA	NA	NA	NA	NA	NA	NA	NA	NA	NA
-690	NA	NA	NA	NA	NA	NA	NA	NA	NA	NA
-685	NA	NA	NA	NA	NA	NA	NA	NA	NA	NA
-682	NA	NA	NA	NA	NA	NA	NA	NA	NA	NA
-681	NA	NA	NA	NA	NA	NA	NA	NA	NA	NA
-680	NA	NA	NA	NA	NA	NA	NA	NA	NA	NA
-678	NA	NA	NA	NA	NA	NA	NA	NA	NA	NA
-673	NA	NA	NA	NA	NA	NA	NA	NA	NA	NA
-672	NA	NA	NA	NA	NA	NA	NA	NA	NA	NA
-671	NA	NA	NA	NA	NA	NA	NA	NA	NA	NA
-670	NA	NA	NA	NA	NA	NA	NA	NA	NA	NA
-669	NA	NA	NA	NA	NA	NA	NA	NA	NA	NA
-667	NA	NA	NA	NA	NA	NA	NA	NA	NA	NA
-666	NA	NA	NA	NA	NA	NA	NA	NA	NA	NA
-665	NA	NA	NA	NA	NA	NA	NA	NA	NA	NA
-658	NA	NA	NA	NA	NA	NA	NA	NA	NA	NA
-657	NA	NA	NA	NA	NA	NA	NA	NA	NA	NA
-656	NA	NA	NA	NA	NA	NA	NA	NA	NA	NA
-655	NA	NA	NA	NA	NA	NA	NA	NA	NA	NA
-654	NA	NA	NA	NA	NA	NA	NA	NA	NA	NA
-651	NA	NA	NA	NA	NA	NA	NA	NA	NA	NA
-648	NA	NA	NA	NA	NA	NA	NA	NA	NA	NA
-647	NA	NA	NA	NA	NA	NA	NA	NA	NA	NA
-646	NA	NA	NA	NA	NA	NA	NA	NA	NA	NA
-644	NA	NA	NA	NA	NA	NA	NA	NA	NA	NA
-643	NA	NA	NA	NA	NA	NA	NA	NA	NA	NA
-642	NA	NA	NA	NA	NA	NA	NA	NA	NA	NA
-641	NA	NA	NA	NA	NA	NA	NA	NA	NA	NA
-640	NA	NA	NA	NA	NA	NA	NA	NA	NA	NA
-639	NA	NA	NA	NA	NA	NA	NA	NA	NA	NA
-637	NA	NA	NA	NA	NA	NA	NA	NA	NA	NA
-636	NA	NA	NA	NA	NA	NA	NA	NA	NA	NA
-634	NA	NA	NA	NA	NA	NA	NA	NA	NA	NA
-633	NA	NA	NA	NA	NA	NA	NA	NA	NA	NA
-632	NA	NA	NA	NA	NA	NA	NA	NA	NA	NA
-630	NA	NA	NA	NA	NA	NA	NA	NA	NA	NA
-629	NA	NA	NA	NA	NA	NA	NA	NA	NA	NA
-627	NA	NA	NA	NA	NA	NA	NA	NA	NA	NA
-626	NA	NA	NA	NA	NA	NA	NA	NA	NA	NA
-625	NA	NA	NA	NA	NA	NA	NA	NA	NA	NA
-624	NA	NA	NA	NA	NA	NA	NA	NA	NA	NA
-623	NA	NA	NA	NA	NA	NA	NA	NA	NA	NA
-622	NA	NA	NA	NA	NA	NA	NA	NA	NA	NA
-621	NA	NA	NA	NA	NA	NA	NA	NA	NA	NA
-620	NA	NA	NA	NA	NA	NA	NA	NA	NA	NA
-618	NA	NA	NA	NA	NA	NA	NA	NA	NA	NA
-616	NA	NA	NA	NA	NA	NA	NA	NA	NA	NA
-615	NA	NA	NA	NA	NA	NA	NA	NA	NA	NA
-613	NA	NA	NA	NA	NA	NA	NA	NA	NA	NA
-611	NA	NA	NA	NA	NA	NA	NA	NA	NA	NA
-609	NA	NA	NA	NA	NA	NA	NA	NA	NA	NA
-607	NA	NA	NA	NA	NA	NA	NA	NA	NA	NA
-606	NA	NA	NA	NA	NA	NA	NA	NA	NA	NA
-604	NA	NA	NA	NA	NA	NA	NA	NA	NA	NA
-599	NA	NA	NA	NA	NA	NA	NA	NA	NA	NA
-598	NA	NA	NA	NA	NA	NA	NA	NA	NA	NA
-595	NA	NA	NA	NA	NA	NA	NA	NA	NA	NA
-594	NA	NA	NA	NA	NA	NA	NA	NA	NA	NA
-592	NA	NA	NA	NA	NA	NA	NA	NA	NA	NA
-591	NA	NA	NA	NA	NA	NA	NA	NA	NA	NA
-590	NA	NA	NA	NA	NA	NA	NA	NA	NA	NA
-586	NA	NA	NA	NA	NA	NA	NA	NA	NA	NA
-584	NA	NA	NA	NA	NA	NA	NA	NA	NA	NA
-583	NA	NA	NA	NA	NA	NA	NA	NA	NA	NA
-581	NA	NA	NA	NA	NA	NA	NA	NA	NA	NA
-580	NA	NA	NA	NA	NA	NA	NA	NA	NA	NA
-579	NA	NA	NA	NA	NA	NA	NA	NA	NA	NA
-578	NA	NA	NA	NA	NA	NA	NA	NA	NA	NA
-577	NA	NA	NA	NA	NA	NA	NA	NA	NA	NA
-576	NA	NA	NA	NA	NA	NA	NA	NA	NA	NA
-573	NA	NA	NA	NA	NA	NA	NA	NA	NA	NA
-572	NA	NA	NA	NA	NA	NA	NA	NA	NA	NA
-571	NA	NA	NA	NA	NA	NA	NA	NA	NA	NA
-566	NA	NA	NA	NA	NA	NA	NA	NA	NA	NA
-565	NA	NA	NA	NA	NA	NA	NA	NA	NA	NA
-564	NA	NA	NA	NA	NA	NA	NA	NA	NA	NA
-562	NA	NA	NA	NA	NA	NA	NA	NA	NA	NA
-561	NA	NA	NA	NA	NA	NA	NA	NA	NA	NA
-560	NA	NA	NA	NA	NA	NA	NA	NA	NA	NA
-559	NA	NA	NA	NA	NA	NA	NA	NA	NA	NA
-558	NA	NA	NA	NA	NA	NA	NA	NA	NA	NA
-551	NA	NA	NA	NA	NA	NA	NA	NA	NA	NA
-549	NA	NA	NA	NA	NA	NA	NA	NA	NA	NA
-548	NA	NA	NA	NA	NA	NA	NA	NA	NA	NA
-547	NA	NA	NA	NA	NA	NA	NA	NA	NA	NA
-545	NA	NA	NA	NA	NA	NA	NA	NA	NA	NA
-543	NA	NA	NA	NA	NA	NA	NA	NA	NA	NA
-542	NA	NA	NA	NA	NA	NA	NA	NA	NA	NA
-540	NA	NA	NA	NA	NA	NA	NA	NA	NA	NA
-508	NA	NA	NA	NA	NA	NA	NA	NA	NA	NA
-506	NA	NA	NA	NA	NA	NA	NA	NA	NA	NA
-505	NA	NA	NA	NA	NA	NA	NA	NA	NA	NA
-504	NA	NA	NA	NA	NA	NA	NA	NA	NA	NA
-502	NA	NA	NA	NA	NA	NA	NA	NA	NA	NA
-501	NA	NA	NA	NA	NA	NA	NA	NA	NA	NA
-497	NA	NA	NA	NA	NA	NA	NA	NA	NA	NA
-493	NA	NA	NA	NA	NA	NA	NA	NA	NA	NA
-492	NA	NA	NA	NA	NA	NA	NA	NA	NA	NA
-491	NA	NA	NA	NA	NA	NA	NA	NA	NA	NA
-490	NA	NA	NA	NA	NA	NA	NA	NA	NA	NA
-489	NA	NA	NA	NA	NA	NA	NA	NA	NA	NA
-488	NA	NA	NA	NA	NA	NA	NA	NA	NA	NA
-485	NA	NA	NA	NA	NA	NA	NA	NA	NA	NA
-484	NA	NA	NA	NA	NA	NA	NA	NA	NA	NA
-482	NA	NA	NA	NA	NA	NA	NA	NA	NA	NA
-480	NA	NA	NA	NA	NA	NA	NA	NA	NA	NA
-478	NA	NA	NA	NA	NA	NA	NA	NA	NA	NA
-477	NA	NA	NA	NA	NA	NA	NA	NA	NA	NA
-475	NA	NA	NA	NA	NA	NA	NA	NA	NA	NA
-474	NA	NA	NA	NA	NA	NA	NA	NA	NA	NA
-473	NA	NA	NA	NA	NA	NA	NA	NA	NA	NA
-471	NA	NA	NA	NA	NA	NA	NA	NA	NA	NA
-470	NA	NA	NA	NA	NA	NA	NA	NA	NA	NA
-469	NA	NA	NA	NA	NA	NA	NA	NA	NA	NA
-467	NA	NA	NA	NA	NA	NA	NA	NA	NA	NA
-463	NA	NA	NA	NA	NA	NA	NA	NA	NA	NA
-461	NA	NA	NA	NA	NA	NA	NA	NA	NA	NA
-460	NA	NA	NA	NA	NA	NA	NA	NA	NA	NA
-458	NA	NA	NA	NA	NA	NA	NA	NA	NA	NA
-456	NA	NA	NA	NA	NA	NA	NA	NA	NA	NA
-455	NA	NA	NA	NA	NA	NA	NA	NA	NA	NA
-452	NA	NA	NA	NA	NA	NA	NA	NA	NA	NA
-451	NA	NA	NA	NA	NA	NA	NA	NA	NA	NA
-450	NA	NA	NA	NA	NA	NA	NA	NA	NA	NA
-449	NA	NA	NA	NA	NA	NA	NA	NA	NA	NA
-419	NA	NA	NA	NA	NA	NA	NA	NA	NA	NA
-417	NA	NA	NA	NA	NA	NA	NA	NA	NA	NA
-416	NA	NA	NA	NA	NA	NA	NA	NA	NA	NA
-413	NA	NA	NA	NA	NA	NA	NA	NA	NA	NA
-411	NA	NA	NA	NA	NA	NA	NA	NA	NA	NA
-408	NA	NA	NA	NA	NA	NA	NA	NA	NA	NA
-405	NA	NA	NA	NA	NA	NA	NA	NA	NA	NA
-404	NA	NA	NA	NA	NA	NA	NA	NA	NA	NA
-403	NA	NA	NA	NA	NA	NA	NA	NA	NA	NA
-401	NA	NA	NA	NA	NA	NA	NA	NA	NA	NA
-399	NA	NA	NA	NA	NA	NA	NA	NA	NA	NA
-398	NA	NA	NA	NA	NA	NA	NA	NA	NA	NA
-395	NA	NA	NA	NA	NA	NA	NA	NA	NA	NA
-394	NA	NA	NA	NA	NA	NA	NA	NA	NA	NA
-393	NA	NA	NA	NA	NA	NA	NA	NA	NA	NA
-392	NA	NA	NA	NA	NA	NA	NA	NA	NA	NA
-391	NA	NA	NA	NA	NA	NA	NA	NA	NA	NA
-390	NA	NA	NA	NA	NA	NA	NA	NA	NA	NA
-389	NA	NA	NA	NA	NA	NA	NA	NA	NA	NA
-388	NA	NA	NA	NA	NA	NA	NA	NA	NA	NA
-387	NA	NA	NA	NA	NA	NA	NA	NA	NA	NA
-386	NA	NA	NA	NA	NA	NA	NA	NA	NA	NA
-385	NA	NA	NA	NA	NA	NA	NA	NA	NA	NA
-384	NA	NA	NA	NA	NA	NA	NA	NA	NA	NA
-383	NA	NA	NA	NA	NA	NA	NA	NA	NA	NA
-382	NA	NA	NA	NA	NA	NA	NA	NA	NA	NA
-381	NA	NA	NA	NA	NA	NA	NA	NA	NA	NA
-380	NA	NA	NA	NA	NA	NA	NA	NA	NA	NA
-379	NA	NA	NA	NA	NA	NA	NA	NA	NA	NA
-378	NA	NA	NA	NA	NA	NA	NA	NA	NA	NA
-377	NA	NA	NA	NA	NA	NA	NA	NA	NA	NA
-376	NA	NA	NA	NA	NA	NA	NA	NA	NA	NA
-375	NA	NA	NA	NA	NA	NA	NA	NA	NA	NA
-374	NA	NA	NA	NA	NA	NA	NA	NA	NA	NA
-373	NA	NA	NA	NA	NA	NA	NA	NA	NA	NA
-372	NA	NA	NA	NA	NA	NA	NA	NA	NA	NA
-371	NA	NA	NA	NA	NA	NA	NA	NA	NA	NA
-370	NA	NA	NA	NA	NA	NA	NA	NA	NA	NA
-369	NA	NA	NA	NA	NA	NA	NA	NA	NA	NA
-368	NA	NA	NA	NA	NA	NA	NA	NA	NA	NA
-367	NA	NA	NA	NA	NA	NA	NA	NA	NA	NA
-366	NA	NA	NA	NA	NA	NA	NA	NA	NA	NA
-365	NA	NA	NA	NA	NA	NA	NA	NA	NA	NA
-364	NA	NA	NA	NA	NA	NA	NA	NA	NA	NA
-363	NA	NA	NA	NA	NA	NA	NA	NA	NA	NA
-362	NA	NA	NA	NA	NA	NA	NA	NA	NA	NA
-361	NA	NA	NA	NA	NA	NA	NA	NA	NA	NA
-360	NA	NA	NA	NA	NA	NA	NA	NA	NA	NA
-359	NA	NA	NA	NA	NA	NA	NA	NA	NA	NA
-358	NA	NA	NA	NA	NA	NA	NA	NA	NA	NA
-356	NA	NA	NA	NA	NA	NA	NA	NA	NA	NA
-355	NA	NA	NA	NA	NA	NA	NA	NA	NA	NA
-352	NA	NA	NA	NA	NA	NA	NA	NA	NA	NA
-351	NA	NA	NA	NA	NA	NA	NA	NA	NA	NA
-350	NA	NA	NA	NA	NA	NA	NA	NA	NA	NA
-349	NA	NA	NA	NA	NA	NA	NA	NA	NA	NA
-348	NA	NA	NA	NA	NA	NA	NA	NA	NA	NA
-347	NA	NA	NA	NA	NA	NA	NA	NA	NA	NA
-346	NA	NA	NA	NA	NA	NA	NA	NA	NA	NA
-345	NA	NA	NA	NA	NA	NA	NA	NA	NA	NA
-344	NA	NA	NA	NA	NA	NA	NA	NA	NA	NA
-341	NA	NA	NA	NA	NA	NA	NA	NA	NA	NA
-340	NA	NA	NA	NA	NA	NA	NA	NA	NA	NA
-339	NA	NA	NA	NA	NA	NA	NA	NA	NA	NA
-338	NA	NA	NA	NA	NA	NA	NA	NA	NA	NA
-336	NA	NA	NA	NA	NA	NA	NA	NA	NA	NA
-335	NA	NA	NA	NA	NA	NA	NA	NA	NA	NA
-334	NA	NA	NA	NA	NA	NA	NA	NA	NA	NA
-332	NA	NA	NA	NA	NA	NA	NA	NA	NA	NA
-330	NA	NA	NA	NA	NA	NA	NA	NA	NA	NA
-328	NA	NA	NA	NA	NA	NA	NA	NA	NA	NA
-325	NA	NA	NA	NA	NA	NA	NA	NA	NA	NA
-324	NA	NA	NA	NA	NA	NA	NA	NA	NA	NA
-320	NA	NA	NA	NA	NA	NA	NA	NA	NA	NA
-319	NA	NA	NA	NA	NA	NA	NA	NA	NA	NA
-317	NA	NA	NA	NA	NA	NA	NA	NA	NA	NA
-316	NA	NA	NA	NA	NA	NA	NA	NA	NA	NA
-315	NA	NA	NA	NA	NA	NA	NA	NA	NA	NA
-314	NA	NA	NA	NA	NA	NA	NA	NA	NA	NA
-313	NA	NA	NA	NA	NA	NA	NA	NA	NA	NA
-312	NA	NA	NA	NA	NA	NA	NA	NA	NA	NA
-311	NA	NA	NA	NA	NA	NA	NA	NA	NA	NA
-310	NA	NA	NA	NA	NA	NA	NA	NA	NA	NA
-309	NA	NA	NA	NA	NA	NA	NA	NA	NA	NA
-308	NA	NA	NA	NA	NA	NA	NA	NA	NA	NA
-307	NA	NA	NA	NA	NA	NA	NA	NA	NA	NA
-306	NA	NA	NA	NA	NA	NA	NA	NA	NA	NA
-305	NA	NA	NA	NA	NA	NA	NA	NA	NA	NA
-302	NA	NA	NA	NA	NA	NA	NA	NA	NA	NA
-301	NA	NA	NA	NA	NA	NA	NA	NA	NA	NA
-298	NA	NA	NA	NA	NA	NA	NA	NA	NA	NA
-296	NA	NA	NA	NA	NA	NA	NA	NA	NA	NA
-295	NA	NA	NA	NA	NA	NA	NA	NA	NA	NA
-294	NA	NA	NA	NA	NA	NA	NA	NA	NA	NA
-293	NA	NA	NA	NA	NA	NA	NA	NA	NA	NA
-290	NA	NA	NA	NA	NA	NA	NA	NA	NA	NA
-289	NA	NA	NA	NA	NA	NA	NA	NA	NA	NA
-287	NA	NA	NA	NA	NA	NA	NA	NA	NA	NA
-286	NA	NA	NA	NA	NA	NA	NA	NA	NA	NA
-285	NA	NA	NA	NA	NA	NA	NA	NA	NA	NA
-284	NA	NA	NA	NA	NA	NA	NA	NA	NA	NA
-283	NA	NA	NA	NA	NA	NA	NA	NA	NA	NA
-282	NA	NA	NA	NA	NA	NA	NA	NA	NA	NA
-281	NA	NA	NA	NA	NA	NA	NA	NA	NA	NA
-280	NA	NA	NA	NA	NA	NA	NA	NA	NA	NA
-278	NA	NA	NA	NA	NA	NA	NA	NA	NA	NA
-277	NA	NA	NA	NA	NA	NA	NA	NA	NA	NA
-276	NA	NA	NA	NA	NA	NA	NA	NA	NA	NA
-275	NA	NA	NA	NA	NA	NA	NA	NA	NA	NA
-274	NA	NA	NA	NA	NA	NA	NA	NA	NA	NA
-273	NA	NA	NA	NA	NA	NA	NA	NA	NA	NA
-272	NA	NA	NA	NA	NA	NA	NA	NA	NA	NA
-271	NA	NA	NA	NA	NA	NA	NA	NA	NA	NA
-270	NA	NA	NA	NA	NA	NA	NA	NA	NA	NA
-269	NA	NA	NA	NA	NA	NA	NA	NA	NA	NA
-268	NA	NA	NA	NA	NA	NA	NA	NA	NA	NA
-267	NA	NA	NA	NA	NA	NA	NA	NA	NA	NA
-265	NA	NA	NA	NA	NA	NA	NA	NA	NA	NA
-264	NA	NA	NA	NA	NA	NA	NA	NA	NA	NA
-262	NA	NA	NA	NA	NA	NA	NA	NA	NA	NA
-261	NA	NA	NA	NA	NA	NA	NA	NA	NA	NA
-193	NA	NA	NA	NA	NA	NA	NA	NA	NA	NA
-192	NA	NA	NA	NA	NA	NA	NA	NA	NA	NA
-191	NA	NA	NA	NA	NA	NA	NA	NA	NA	NA
-190	NA	NA	NA	NA	NA	NA	NA	NA	NA	NA
-189	NA	NA	NA	NA	NA	NA	NA	NA	NA	NA
-188	NA	NA	NA	NA	NA	NA	NA	NA	NA	NA
-187	NA	NA	NA	NA	NA	NA	NA	NA	NA	NA
-186	NA	NA	NA	NA	NA	NA	NA	NA	NA	NA
-185	NA	NA	NA	NA	NA	NA	NA	NA	NA	NA
-183	NA	NA	NA	NA	NA	NA	NA	NA	NA	NA
-182	NA	NA	NA	NA	NA	NA	NA	NA	NA	NA
-181	NA	NA	NA	NA	NA	NA	NA	NA	NA	NA
-180	NA	NA	NA	NA	NA	NA	NA	NA	NA	NA
-179	NA	NA	NA	NA	NA	NA	NA	NA	NA	NA
-178	NA	NA	NA	NA	NA	NA	NA	NA	NA	NA
-177	NA	NA	NA	NA	NA	NA	NA	NA	NA	NA
-157	NA	NA	NA	NA	NA	NA	NA	NA	NA	NA
-110	NA	NA	NA	NA	NA	NA	NA	NA	NA	NA
-99	NA	NA	NA	NA	NA	NA	NA	NA	NA	NA
-83	NA	NA	NA	NA	NA	NA	NA	NA	NA	NA
-81	NA	NA	NA	NA	NA	NA	NA	NA	NA	NA
-79	NA	NA	NA	NA	NA	NA	NA	NA	NA	NA
-61	NA	NA	NA	NA	NA	NA	NA	NA	NA	NA
-49	NA	NA	NA	NA	NA	NA	NA	NA	NA	NA
-41	NA	NA	NA	NA	NA	NA	NA	NA	NA	NA
-40	NA	NA	NA	NA	NA	NA	NA	NA	NA	NA
-36	NA	NA	NA	NA	NA	NA	NA	NA	NA	NA
-32	NA	NA	NA	NA	NA	NA	NA	NA	NA	NA
-30	NA	NA	NA	NA	NA	NA	NA	NA	NA	NA
-29	NA	NA	NA	NA	NA	NA	NA	NA	NA	NA
-14	NA	NA	NA	NA	NA	NA	NA	NA	NA	NA
-10	NA	NA	NA	NA	NA	NA	NA	NA	NA	NA
-8	NA	NA	NA	NA	NA	NA	NA	NA	NA	NA
-2	NA	NA	NA	NA	NA	NA	NA	NA	NA	NA
4	NA	NA	NA	NA	NA	NA	NA	NA	NA	NA
10	NA	NA	NA	NA	NA	NA	NA	NA	NA	NA
27	NA	NA	NA	NA	NA	NA	NA	NA	NA	NA
48	NA	NA	NA	NA	NA	NA	NA	NA	NA	NA
65	NA	NA	NA	NA	NA	NA	NA	NA	NA	NA
79	NA	NA	NA	NA	NA	NA	NA	NA	NA	NA
92	NA	NA	NA	NA	NA	NA	NA	NA	NA	NA
98	NA	NA	NA	NA	NA	NA	NA	NA	NA	NA
114	NA	NA	NA	NA	NA	NA	NA	NA	NA	NA
121	NA	NA	NA	NA	NA	NA	NA	NA	NA	NA
126	NA	NA	NA	NA	NA	NA	NA	NA	NA	NA
140	NA	NA	NA	NA	NA	NA	NA	NA	NA	NA
149	NA	NA	NA	NA	NA	NA	NA	NA	NA	NA
150	NA	NA	NA	NA	NA	NA	NA	NA	NA	NA
155	NA	NA	NA	NA	NA	NA	NA	NA	NA	NA
159	NA	NA	NA	NA	NA	NA	NA	NA	NA	NA
160	NA	NA	NA	NA	NA	NA	NA	NA	NA	NA
163	NA	NA	NA	NA	NA	NA	NA	NA	NA	NA
168	NA	NA	NA	NA	NA	NA	NA	NA	NA	NA
175	NA	NA	NA	NA	NA	NA	NA	NA	NA	NA
181	NA	NA	NA	NA	NA	NA	NA	NA	NA	NA
186	NA	NA	NA	NA	NA	NA	NA	NA	NA	NA
187	NA	NA	NA	NA	NA	NA	NA	NA	NA	NA
191	NA	NA	NA	NA	NA	NA	NA	NA	NA	NA
198	NA	NA	NA	NA	NA	NA	NA	NA	NA	NA
199	NA	NA	NA	NA	NA	NA	NA	NA	NA	NA
201	NA	NA	NA	NA	NA	NA	NA	NA	NA	NA
222	NA	NA	NA	NA	NA	NA	NA	NA	NA	NA
241	NA	NA	NA	NA	NA	NA	NA	NA	NA	NA
253	NA	NA	NA	NA	NA	NA	NA	NA	NA	NA
254	NA	NA	NA	NA	NA	NA	NA	NA	NA	NA
255	NA	NA	NA	NA	NA	NA	NA	NA	NA	NA
258	NA	NA	NA	NA	NA	NA	NA	NA	NA	NA
260	NA	NA	NA	NA	NA	NA	NA	NA	NA	NA
262	NA	NA	NA	NA	NA	NA	NA	NA	NA	NA
263	NA	NA	NA	NA	NA	NA	NA	NA	NA	NA
265	NA	NA	NA	NA	NA	NA	NA	NA	NA	NA
266	NA	NA	NA	NA	NA	NA	NA	NA	NA	NA
267	NA	NA	NA	NA	NA	NA	NA	NA	NA	NA
268	NA	NA	NA	NA	NA	NA	NA	NA	NA	NA
269	NA	NA	NA	NA	NA	NA	NA	NA	NA	NA
270	NA	NA	NA	NA	NA	NA	NA	NA	NA	NA
271	NA	NA	NA	NA	NA	NA	NA	NA	NA	NA
272	NA	NA	NA	NA	NA	NA	NA	NA	NA	NA
274	NA	NA	NA	NA	NA	NA	NA	NA	NA	NA
275	NA	NA	NA	NA	NA	NA	NA	NA	NA	NA
276	NA	NA	NA	NA	NA	NA	NA	NA	NA	NA
277	NA	NA	NA	NA	NA	NA	NA	NA	NA	NA
278	NA	NA	NA	NA	NA	NA	NA	NA	NA	NA
279	NA	NA	NA	NA	NA	NA	NA	NA	NA	NA
280	NA	NA	NA	NA	NA	NA	NA	NA	NA	NA
281	NA	NA	NA	NA	NA	NA	NA	NA	NA	NA
282	NA	NA	NA	NA	NA	NA	NA	NA	NA	NA
283	NA	NA	NA	NA	NA	NA	NA	NA	NA	NA
284	NA	NA	NA	NA	NA	NA	NA	NA	NA	NA
285	NA	NA	NA	NA	NA	NA	NA	NA	NA	NA
290	NA	NA	NA	NA	NA	NA	NA	NA	NA	NA
291	NA	NA	NA	NA	NA	NA	NA	NA	NA	NA
293	NA	NA	NA	NA	NA	NA	NA	NA	NA	NA
294	NA	NA	NA	NA	NA	NA	NA	NA	NA	NA
295	NA	NA	NA	NA	NA	NA	NA	NA	NA	NA
296	NA	NA	NA	NA	NA	NA	NA	NA	NA	NA
297	NA	NA	NA	NA	NA	NA	NA	NA	NA	NA
298	NA	NA	NA	NA	NA	NA	NA	NA	NA	NA
299	NA	NA	NA	NA	NA	NA	NA	NA	NA	NA
300	NA	NA	NA	NA	NA	NA	NA	NA	NA	NA
302	NA	NA	NA	NA	NA	NA	NA	NA	NA	NA
303	NA	NA	NA	NA	NA	NA	NA	NA	NA	NA
304	NA	NA	NA	NA	NA	NA	NA	NA	NA	NA
307	NA	NA	NA	NA	NA	NA	NA	NA	NA	NA
310	NA	NA	NA	NA	NA	NA	NA	NA	NA	NA
311	NA	NA	NA	NA	NA	NA	NA	NA	NA	NA
315	NA	NA	NA	NA	NA	NA	NA	NA	NA	NA
316	NA	NA	NA	NA	NA	NA	NA	NA	NA	NA
317	NA	NA	NA	NA	NA	NA	NA	NA	NA	NA
318	NA	NA	NA	NA	NA	NA	NA	NA	NA	NA
320	NA	NA	NA	NA	NA	NA	NA	NA	NA	NA
321	NA	NA	NA	NA	NA	NA	NA	NA	NA	NA
323	NA	NA	NA	NA	NA	NA	NA	NA	NA	NA
324	NA	NA	NA	NA	NA	NA	NA	NA	NA	NA
325	NA	NA	NA	NA	NA	NA	NA	NA	NA	NA
326	NA	NA	NA	NA	NA	NA	NA	NA	NA	NA
328	NA	NA	NA	NA	NA	NA	NA	NA	NA	NA
330	NA	NA	NA	NA	NA	NA	NA	NA	NA	NA
334	NA	NA	NA	NA	NA	NA	NA	NA	NA	NA
335	NA	NA	NA	NA	NA	NA	NA	NA	NA	NA
336	NA	NA	NA	NA	NA	NA	NA	NA	NA	NA
337	NA	NA	NA	NA	NA	NA	NA	NA	NA	NA
338	NA	NA	NA	NA	NA	NA	NA	NA	NA	NA
339	NA	NA	NA	NA	NA	NA	NA	NA	NA	NA
340	NA	NA	NA	NA	NA	NA	NA	NA	NA	NA
341	NA	NA	NA	NA	NA	NA	NA	NA	NA	NA
342	2	6	6	3	5	6	1	1	1	1
343	NA	NA	NA	NA	NA	NA	NA	NA	NA	NA
344	5	6	6	3	5	5	2	2	4	4
345	NA	NA	NA	NA	NA	NA	NA	NA	NA	NA
346	NA	NA	NA	NA	NA	NA	NA	NA	NA	NA
347	NA	NA	NA	NA	NA	NA	NA	NA	NA	NA
348	NA	NA	NA	NA	NA	NA	NA	NA	NA	NA
350	NA	NA	NA	NA	NA	NA	NA	NA	NA	NA
351	NA	NA	NA	NA	NA	NA	NA	NA	NA	NA
352	NA	NA	NA	NA	NA	NA	NA	NA	NA	NA
369	NA	NA	NA	NA	NA	NA	NA	NA	NA	NA
383	NA	NA	NA	NA	NA	NA	NA	NA	NA	NA
388	NA	NA	NA	NA	NA	NA	NA	NA	NA	NA
400	NA	NA	NA	NA	NA	NA	NA	NA	NA	NA
401	NA	NA	NA	NA	NA	NA	NA	NA	NA	NA
418	NA	NA	NA	NA	NA	NA	NA	NA	NA	NA
453	NA	NA	NA	NA	NA	NA	NA	NA	NA	NA
464	NA	NA	NA	NA	NA	NA	NA	NA	NA	NA
479	NA	NA	NA	NA	NA	NA	NA	NA	NA	NA
484	NA	NA	NA	NA	NA	NA	NA	NA	NA	NA
487	NA	NA	NA	NA	NA	NA	NA	NA	NA	NA
491	NA	NA	NA	NA	NA	NA	NA	NA	NA	NA
498	NA	NA	NA	NA	NA	NA	NA	NA	NA	NA
502	NA	NA	NA	NA	NA	NA	NA	NA	NA	NA
536	NA	NA	NA	NA	NA	NA	NA	NA	NA	NA
542	NA	NA	NA	NA	NA	NA	NA	NA	NA	NA
544	NA	NA	NA	NA	NA	NA	NA	NA	NA	NA
545	NA	NA	NA	NA	NA	NA	NA	NA	NA	NA
548	NA	NA	NA	NA	NA	NA	NA	NA	NA	NA
554	NA	NA	NA	NA	NA	NA	NA	NA	NA	NA
562	NA	NA	NA	NA	NA	NA	NA	NA	NA	NA
563	NA	NA	NA	NA	NA	NA	NA	NA	NA	NA
572	NA	NA	NA	NA	NA	NA	NA	NA	NA	NA
576	NA	NA	NA	NA	NA	NA	NA	NA	NA	NA
619	NA	NA	NA	NA	NA	NA	NA	NA	NA	NA
620	NA	NA	NA	NA	NA	NA	NA	NA	NA	NA
621	NA	NA	NA	NA	NA	NA	NA	NA	NA	NA
623	NA	NA	NA	NA	NA	NA	NA	NA	NA	NA
624	NA	NA	NA	NA	NA	NA	NA	NA	NA	NA
625	NA	NA	NA	NA	NA	NA	NA	NA	NA	NA
628	NA	NA	NA	NA	NA	NA	NA	NA	NA	NA
629	NA	NA	NA	NA	NA	NA	NA	NA	NA	NA
634	NA	NA	NA	NA	NA	NA	NA	NA	NA	NA
636	NA	NA	NA	NA	NA	NA	NA	NA	NA	NA
637	NA	NA	NA	NA	NA	NA	NA	NA	NA	NA
643	NA	NA	NA	NA	NA	NA	NA	NA	NA	NA
646	NA	NA	NA	NA	NA	NA	NA	NA	NA	NA
651	NA	NA	NA	NA	NA	NA	NA	NA	NA	NA
657	NA	NA	NA	NA	NA	NA	NA	NA	NA	NA
658	NA	NA	NA	NA	NA	NA	NA	NA	NA	NA
659	NA	NA	NA	NA	NA	NA	NA	NA	NA	NA
660	NA	NA	NA	NA	NA	NA	NA	NA	NA	NA
664	NA	NA	NA	NA	NA	NA	NA	NA	NA	NA
665	NA	NA	NA	NA	NA	NA	NA	NA	NA	NA
670	NA	NA	NA	NA	NA	NA	NA	NA	NA	NA
671	NA	NA	NA	NA	NA	NA	NA	NA	NA	NA
673	NA	NA	NA	NA	NA	NA	NA	NA	NA	NA
674	NA	NA	NA	NA	NA	NA	NA	NA	NA	NA
678	NA	NA	NA	NA	NA	NA	NA	NA	NA	NA
682	NA	NA	NA	NA	NA	NA	NA	NA	NA	NA
689	NA	NA	NA	NA	NA	NA	NA	NA	NA	NA
691	NA	NA	NA	NA	NA	NA	NA	NA	NA	NA
692	NA	NA	NA	NA	NA	NA	NA	NA	NA	NA
713	NA	NA	NA	NA	NA	NA	NA	NA	NA	NA
714	NA	NA	NA	NA	NA	NA	NA	NA	NA	NA
730	NA	NA	NA	NA	NA	NA	NA	NA	NA	NA
736	NA	NA	NA	NA	NA	NA	NA	NA	NA	NA
741	NA	NA	NA	NA	NA	NA	NA	NA	NA	NA
749	NA	NA	NA	NA	NA	NA	NA	NA	NA	NA
757	NA	NA	NA	NA	NA	NA	NA	NA	NA	NA
758	NA	NA	NA	NA	NA	NA	NA	NA	NA	NA
762	NA	NA	NA	NA	NA	NA	NA	NA	NA	NA
763	NA	NA	NA	NA	NA	NA	NA	NA	NA	NA
764	NA	NA	NA	NA	NA	NA	NA	NA	NA	NA
765	NA	NA	NA	NA	NA	NA	NA	NA	NA	NA
768	NA	NA	NA	NA	NA	NA	NA	NA	NA	NA
769	NA	NA	NA	NA	NA	NA	NA	NA	NA	NA
770	NA	NA	NA	NA	NA	NA	NA	NA	NA	NA
775	NA	NA	NA	NA	NA	NA	NA	NA	NA	NA
778	NA	NA	NA	NA	NA	NA	NA	NA	NA	NA
780	NA	NA	NA	NA	NA	NA	NA	NA	NA	NA
782	NA	NA	NA	NA	NA	NA	NA	NA	NA	NA
783	NA	NA	NA	NA	NA	NA	NA	NA	NA	NA
784	NA	NA	NA	NA	NA	NA	NA	NA	NA	NA
786	NA	NA	NA	NA	NA	NA	NA	NA	NA	NA
787	NA	NA	NA	NA	NA	NA	NA	NA	NA	NA
790	NA	NA	NA	NA	NA	NA	NA	NA	NA	NA
792	NA	NA	NA	NA	NA	NA	NA	NA	NA	NA
793	NA	NA	NA	NA	NA	NA	NA	NA	NA	NA
794	NA	NA	NA	NA	NA	NA	NA	NA	NA	NA
795	NA	NA	NA	NA	NA	NA	NA	NA	NA	NA
798	NA	NA	NA	NA	NA	NA	NA	NA	NA	NA
800	NA	NA	NA	NA	NA	NA	NA	NA	NA	NA
801	NA	NA	NA	NA	NA	NA	NA	NA	NA	NA
802	NA	NA	NA	NA	NA	NA	NA	NA	NA	NA
803	NA	NA	NA	NA	NA	NA	NA	NA	NA	NA
808	NA	NA	NA	NA	NA	NA	NA	NA	NA	NA
810	NA	NA	NA	NA	NA	NA	NA	NA	NA	NA
813	NA	NA	NA	NA	NA	NA	NA	NA	NA	NA
816	NA	NA	NA	NA	NA	NA	NA	NA	NA	NA
817	NA	NA	NA	NA	NA	NA	NA	NA	NA	NA
818	NA	NA	NA	NA	NA	NA	NA	NA	NA	NA
819	NA	NA	NA	NA	NA	NA	NA	NA	NA	NA
821	NA	NA	NA	NA	NA	NA	NA	NA	NA	NA
823	NA	NA	NA	NA	NA	NA	NA	NA	NA	NA
825	NA	NA	NA	NA	NA	NA	NA	NA	NA	NA
826	NA	NA	NA	NA	NA	NA	NA	NA	NA	NA
827	NA	NA	NA	NA	NA	NA	NA	NA	NA	NA
828	NA	NA	NA	NA	NA	NA	NA	NA	NA	NA
830	NA	NA	NA	NA	NA	NA	NA	NA	NA	NA
832	NA	NA	NA	NA	NA	NA	NA	NA	NA	NA
833	NA	NA	NA	NA	NA	NA	NA	NA	NA	NA
836	NA	NA	NA	NA	NA	NA	NA	NA	NA	NA
837	NA	NA	NA	NA	NA	NA	NA	NA	NA	NA
838	NA	NA	NA	NA	NA	NA	NA	NA	NA	NA
839	NA	NA	NA	NA	NA	NA	NA	NA	NA	NA
840	NA	NA	NA	NA	NA	NA	NA	NA	NA	NA
842	NA	NA	NA	NA	NA	NA	NA	NA	NA	NA
844	NA	NA	NA	NA	NA	NA	NA	NA	NA	NA
846	NA	NA	NA	NA	NA	NA	NA	NA	NA	NA
847	NA	NA	NA	NA	NA	NA	NA	NA	NA	NA
848	NA	NA	NA	NA	NA	NA	NA	NA	NA	NA
849	NA	NA	NA	NA	NA	NA	NA	NA	NA	NA
851	NA	NA	NA	NA	NA	NA	NA	NA	NA	NA
853	NA	NA	NA	NA	NA	NA	NA	NA	NA	NA
854	NA	NA	NA	NA	NA	NA	NA	NA	NA	NA
855	NA	NA	NA	NA	NA	NA	NA	NA	NA	NA
856	NA	NA	NA	NA	NA	NA	NA	NA	NA	NA
858	NA	NA	NA	NA	NA	NA	NA	NA	NA	NA
859	NA	NA	NA	NA	NA	NA	NA	NA	NA	NA
860	NA	NA	NA	NA	NA	NA	NA	NA	NA	NA
862	NA	NA	NA	NA	NA	NA	NA	NA	NA	NA
863	NA	NA	NA	NA	NA	NA	NA	NA	NA	NA
865	NA	NA	NA	NA	NA	NA	NA	NA	NA	NA
866	NA	NA	NA	NA	NA	NA	NA	NA	NA	NA
868	NA	NA	NA	NA	NA	NA	NA	NA	NA	NA
869	NA	NA	NA	NA	NA	NA	NA	NA	NA	NA
872	NA	NA	NA	NA	NA	NA	NA	NA	NA	NA
873	NA	NA	NA	NA	NA	NA	NA	NA	NA	NA
875	NA	NA	NA	NA	NA	NA	NA	NA	NA	NA
876	NA	NA	NA	NA	NA	NA	NA	NA	NA	NA
877	NA	NA	NA	NA	NA	NA	NA	NA	NA	NA
879	NA	NA	NA	NA	NA	NA	NA	NA	NA	NA
880	NA	NA	NA	NA	NA	NA	NA	NA	NA	NA
882	NA	NA	NA	NA	NA	NA	NA	NA	NA	NA
883	NA	NA	NA	NA	NA	NA	NA	NA	NA	NA
885	NA	NA	NA	NA	NA	NA	NA	NA	NA	NA
886	NA	NA	NA	NA	NA	NA	NA	NA	NA	NA
887	3	NA	NA	NA	NA	NA	NA	NA	NA	NA
890	4	NA	NA	NA	NA	NA	NA	NA	NA	NA
891	7	NA	NA	NA	NA	NA	NA	NA	NA	NA
892	NA	NA	NA	NA	NA	NA	NA	NA	NA	NA
894	3	NA	NA	NA	NA	NA	NA	NA	NA	NA
897	4	NA	NA	NA	NA	NA	NA	NA	NA	NA
898	5	NA	NA	NA	NA	NA	NA	NA	NA	NA
899	NA	NA	NA	NA	NA	NA	NA	NA	NA	NA
900	1	NA	NA	NA	NA	NA	NA	NA	NA	NA
901	NA	NA	NA	NA	NA	NA	NA	NA	NA	NA
902	NA	NA	NA	NA	NA	NA	NA	NA	NA	NA
903	NA	NA	NA	NA	NA	NA	NA	NA	NA	NA
904	NA	NA	NA	NA	NA	NA	NA	NA	NA	NA
905	NA	NA	NA	NA	NA	NA	NA	NA	NA	NA
906	2	NA	NA	NA	NA	NA	NA	NA	NA	NA
908	NA	NA	NA	NA	NA	NA	NA	NA	NA	NA
909	NA	NA	NA	NA	NA	NA	NA	NA	NA	NA
911	NA	NA	NA	NA	NA	NA	NA	NA	NA	NA
912	NA	NA	NA	NA	NA	NA	NA	NA	NA	NA
913	NA	NA	NA	NA	NA	NA	NA	NA	NA	NA
915	NA	NA	NA	NA	NA	NA	NA	NA	NA	NA
916	NA	NA	NA	NA	NA	NA	NA	NA	NA	NA
917	NA	NA	NA	NA	NA	NA	NA	NA	NA	NA
918	NA	NA	NA	NA	NA	NA	NA	NA	NA	NA
921	NA	NA	NA	NA	NA	NA	NA	NA	NA	NA
922	NA	NA	NA	NA	NA	NA	NA	NA	NA	NA
923	NA	NA	NA	NA	NA	NA	NA	NA	NA	NA
924	NA	NA	NA	NA	NA	NA	NA	NA	NA	NA
926	NA	NA	NA	NA	NA	NA	NA	NA	NA	NA
927	NA	NA	NA	NA	NA	NA	NA	NA	NA	NA
928	NA	NA	NA	NA	NA	NA	NA	NA	NA	NA
929	NA	NA	NA	NA	NA	NA	NA	NA	NA	NA
930	NA	NA	NA	NA	NA	NA	NA	NA	NA	NA
931	NA	NA	NA	NA	NA	NA	NA	NA	NA	NA
932	NA	NA	NA	NA	NA	NA	NA	NA	NA	NA
934	NA	NA	NA	NA	NA	NA	NA	NA	NA	NA
936	NA	NA	NA	NA	NA	NA	NA	NA	NA	NA
937	NA	NA	NA	NA	NA	NA	NA	NA	NA	NA
938	NA	NA	NA	NA	NA	NA	NA	NA	NA	NA
939	NA	NA	NA	NA	NA	NA	NA	NA	NA	NA
940	NA	NA	NA	NA	NA	NA	NA	NA	NA	NA
941	NA	NA	NA	NA	NA	NA	NA	NA	NA	NA
942	NA	NA	NA	NA	NA	NA	NA	NA	NA	NA
946	NA	NA	NA	NA	NA	NA	NA	NA	NA	NA
947	NA	NA	NA	NA	NA	NA	NA	NA	NA	NA
950	NA	NA	NA	NA	NA	NA	NA	NA	NA	NA
951	NA	NA	NA	NA	NA	NA	NA	NA	NA	NA
955	NA	NA	NA	NA	NA	NA	NA	NA	NA	NA
956	NA	NA	NA	NA	NA	NA	NA	NA	NA	NA
957	NA	NA	NA	NA	NA	NA	NA	NA	NA	NA
960	NA	NA	NA	NA	NA	NA	NA	NA	NA	NA
961	NA	NA	NA	NA	NA	NA	NA	NA	NA	NA
963	NA	NA	NA	NA	NA	NA	NA	NA	NA	NA
967	NA	NA	NA	NA	NA	NA	NA	NA	NA	NA
968	NA	NA	NA	NA	NA	NA	NA	NA	NA	NA
969	NA	NA	NA	NA	NA	NA	NA	NA	NA	NA
970	NA	NA	NA	NA	NA	NA	NA	NA	NA	NA
971	NA	NA	NA	NA	NA	NA	NA	NA	NA	NA
972	NA	NA	NA	NA	NA	NA	NA	NA	NA	NA
974	NA	NA	NA	NA	NA	NA	NA	NA	NA	NA
975	NA	NA	NA	NA	NA	NA	NA	NA	NA	NA
976	NA	NA	NA	NA	NA	NA	NA	NA	NA	NA
977	NA	NA	NA	NA	NA	NA	NA	NA	NA	NA
978	NA	NA	NA	NA	NA	NA	NA	NA	NA	NA
979	NA	NA	NA	NA	NA	NA	NA	NA	NA	NA
981	NA	NA	NA	NA	NA	NA	NA	NA	NA	NA
984	NA	NA	NA	NA	NA	NA	NA	NA	NA	NA
985	NA	NA	NA	NA	NA	NA	NA	NA	NA	NA
986	NA	NA	NA	NA	NA	NA	NA	NA	NA	NA
987	NA	NA	NA	NA	NA	NA	NA	NA	NA	NA
988	NA	NA	NA	NA	NA	NA	NA	NA	NA	NA
989	NA	NA	NA	NA	NA	NA	NA	NA	NA	NA
990	NA	NA	NA	NA	NA	NA	NA	NA	NA	NA
991	NA	NA	NA	NA	NA	NA	NA	NA	NA	NA
993	NA	NA	NA	NA	NA	NA	NA	NA	NA	NA
994	NA	NA	NA	NA	NA	NA	NA	NA	NA	NA
998	NA	NA	NA	NA	NA	NA	NA	NA	NA	NA
999	NA	NA	NA	NA	NA	NA	NA	NA	NA	NA
1000	NA	NA	NA	NA	NA	NA	NA	NA	NA	NA
1001	NA	NA	NA	NA	NA	NA	NA	NA	NA	NA
1002	NA	NA	NA	NA	NA	NA	NA	NA	NA	NA
1005	NA	NA	NA	NA	NA	NA	NA	NA	NA	NA
1007	NA	NA	NA	NA	NA	NA	NA	NA	NA	NA
1008	NA	NA	NA	NA	NA	NA	NA	NA	NA	NA
1011	NA	NA	NA	NA	NA	NA	NA	NA	NA	NA
1012	NA	NA	NA	NA	NA	NA	NA	NA	NA	NA
1014	NA	NA	NA	NA	NA	NA	NA	NA	NA	NA
1015	NA	NA	NA	NA	NA	NA	NA	NA	NA	NA
1017	NA	NA	NA	NA	NA	NA	NA	NA	NA	NA
1018	NA	NA	NA	NA	NA	NA	NA	NA	NA	NA
1019	NA	NA	NA	NA	NA	NA	NA	NA	NA	NA
1020	NA	NA	NA	NA	NA	NA	NA	NA	NA	NA
1021	NA	NA	NA	NA	NA	NA	NA	NA	NA	NA
1023	NA	NA	NA	NA	NA	NA	NA	NA	NA	NA
1024	NA	NA	NA	NA	NA	NA	NA	NA	NA	NA
1026	NA	NA	NA	NA	NA	NA	NA	NA	NA	NA
1027	NA	NA	NA	NA	NA	NA	NA	NA	NA	NA
1030	NA	NA	NA	NA	NA	NA	NA	NA	NA	NA
1032	NA	NA	NA	NA	NA	NA	NA	NA	NA	NA
1033	NA	NA	NA	NA	NA	NA	NA	NA	NA	NA
1035	NA	NA	NA	NA	NA	NA	NA	NA	NA	NA
1036	NA	NA	NA	NA	NA	NA	NA	NA	NA	NA
1037	NA	NA	NA	NA	NA	NA	NA	NA	NA	NA
1038	NA	NA	NA	NA	NA	NA	NA	NA	NA	NA
1039	NA	NA	NA	NA	NA	NA	NA	NA	NA	NA
1041	NA	NA	NA	NA	NA	NA	NA	NA	NA	NA
1042	NA	NA	NA	NA	NA	NA	NA	NA	NA	NA
1046	NA	NA	NA	NA	NA	NA	NA	NA	NA	NA
1049	NA	NA	NA	NA	NA	NA	NA	NA	NA	NA
1051	NA	NA	NA	NA	NA	NA	NA	NA	NA	NA
1053	NA	NA	NA	NA	NA	NA	NA	NA	NA	NA
1055	NA	NA	NA	NA	NA	NA	NA	NA	NA	NA
1056	NA	NA	NA	NA	NA	NA	NA	NA	NA	NA
1058	NA	NA	NA	NA	NA	NA	NA	NA	NA	NA
1059	NA	NA	NA	NA	NA	NA	NA	NA	NA	NA
1060	NA	NA	NA	NA	NA	NA	NA	NA	NA	NA
1062	NA	NA	NA	NA	NA	NA	NA	NA	NA	NA
1064	NA	NA	NA	NA	NA	NA	NA	NA	NA	NA
1065	NA	NA	NA	NA	NA	NA	NA	NA	NA	NA
1066	NA	NA	NA	NA	NA	NA	NA	NA	NA	NA
1068	NA	NA	NA	NA	NA	NA	NA	NA	NA	NA
1069	NA	NA	NA	NA	NA	NA	NA	NA	NA	NA
1070	NA	NA	NA	NA	NA	NA	NA	NA	NA	NA
1071	NA	NA	NA	NA	NA	NA	NA	NA	NA	NA
1072	NA	NA	NA	NA	NA	NA	NA	NA	NA	NA
1073	NA	NA	NA	NA	NA	NA	NA	NA	NA	NA
1075	NA	NA	NA	NA	NA	NA	NA	NA	NA	NA
1077	NA	NA	NA	NA	NA	NA	NA	NA	NA	NA
1078	NA	NA	NA	NA	NA	NA	NA	NA	NA	NA
1079	NA	NA	NA	NA	NA	NA	NA	NA	NA	NA
1081	NA	NA	NA	NA	NA	NA	NA	NA	NA	NA
1082	NA	NA	NA	NA	NA	NA	NA	NA	NA	NA
1083	NA	NA	NA	NA	NA	NA	NA	NA	NA	NA
1084	NA	NA	NA	NA	NA	NA	NA	NA	NA	NA
1086	NA	NA	NA	NA	NA	NA	NA	NA	NA	NA
1087	NA	NA	NA	NA	NA	NA	NA	NA	NA	NA
1088	NA	NA	NA	NA	NA	NA	NA	NA	NA	NA
1089	NA	NA	NA	NA	NA	NA	NA	NA	NA	NA
1090	NA	NA	NA	NA	NA	NA	NA	NA	NA	NA
1091	NA	NA	NA	NA	NA	NA	NA	NA	NA	NA
1092	NA	NA	NA	NA	NA	NA	NA	NA	NA	NA
1093	NA	NA	NA	NA	NA	NA	NA	NA	NA	NA
1094	NA	NA	NA	NA	NA	NA	NA	NA	NA	NA
1097	NA	NA	NA	NA	NA	NA	NA	NA	NA	NA
1098	NA	NA	NA	NA	NA	NA	NA	NA	NA	NA
1099	NA	NA	NA	NA	NA	NA	NA	NA	NA	NA
1100	NA	NA	NA	NA	NA	NA	NA	NA	NA	NA
1102	NA	NA	NA	NA	NA	NA	NA	NA	NA	NA
1103	NA	NA	NA	NA	NA	NA	NA	NA	NA	NA
1104	NA	NA	NA	NA	NA	NA	NA	NA	NA	NA
1107	NA	NA	NA	NA	NA	NA	NA	NA	NA	NA
1108	NA	NA	NA	NA	NA	NA	NA	NA	NA	NA
1109	NA	NA	NA	NA	NA	NA	NA	NA	NA	NA
1111	NA	NA	NA	NA	NA	NA	NA	NA	NA	NA
1112	NA	NA	NA	NA	NA	NA	NA	NA	NA	NA
1116	NA	NA	NA	NA	NA	NA	NA	NA	NA	NA
1117	NA	NA	NA	NA	NA	NA	NA	NA	NA	NA
1118	NA	NA	NA	NA	NA	NA	NA	NA	NA	NA
1121	NA	NA	NA	NA	NA	NA	NA	NA	NA	NA
1122	NA	NA	NA	NA	NA	NA	NA	NA	NA	NA
1123	NA	NA	NA	NA	NA	NA	NA	NA	NA	NA
1126	NA	NA	NA	NA	NA	NA	NA	NA	NA	NA
1127	NA	NA	NA	NA	NA	NA	NA	NA	NA	NA
1128	NA	NA	NA	NA	NA	NA	NA	NA	NA	NA
1132	NA	NA	NA	NA	NA	NA	NA	NA	NA	NA
1133	NA	NA	NA	NA	NA	NA	NA	NA	NA	NA
1138	NA	NA	NA	NA	NA	NA	NA	NA	NA	NA
1139	NA	NA	NA	NA	NA	NA	NA	NA	NA	NA
1140	NA	NA	NA	NA	NA	NA	NA	NA	NA	NA
1141	NA	NA	NA	NA	NA	NA	NA	NA	NA	NA
1144	NA	NA	NA	NA	NA	NA	NA	NA	NA	NA
1145	NA	NA	NA	NA	NA	NA	NA	NA	NA	NA
1146	NA	NA	NA	NA	NA	NA	NA	NA	NA	NA
1147	NA	NA	NA	NA	NA	NA	NA	NA	NA	NA
1148	NA	NA	NA	NA	NA	NA	NA	NA	NA	NA
1149	NA	NA	NA	NA	NA	NA	NA	NA	NA	NA
1150	NA	NA	NA	NA	NA	NA	NA	NA	NA	NA
1151	NA	NA	NA	NA	NA	NA	NA	NA	NA	NA
1152	NA	NA	NA	NA	NA	NA	NA	NA	NA	NA
1153	NA	NA	NA	NA	NA	NA	NA	NA	NA	NA
1154	NA	NA	NA	NA	NA	NA	NA	NA	NA	NA
1155	NA	NA	NA	NA	NA	NA	NA	NA	NA	NA
1156	NA	NA	NA	NA	NA	NA	NA	NA	NA	NA
1157	NA	NA	NA	NA	NA	NA	NA	NA	NA	NA
1158	NA	NA	NA	NA	NA	NA	NA	NA	NA	NA
1159	NA	NA	NA	NA	NA	NA	NA	NA	NA	NA
1160	NA	NA	NA	NA	NA	NA	NA	NA	NA	NA
1161	NA	NA	NA	NA	NA	NA	NA	NA	NA	NA
1162	NA	NA	NA	NA	NA	NA	NA	NA	NA	NA
1163	NA	NA	NA	NA	NA	NA	NA	NA	NA	NA
1164	NA	NA	NA	NA	NA	NA	NA	NA	NA	NA
1165	NA	NA	NA	NA	NA	NA	NA	NA	NA	NA
1167	NA	NA	NA	NA	NA	NA	NA	NA	NA	NA
1168	NA	NA	NA	NA	NA	NA	NA	NA	NA	NA
1169	NA	NA	NA	NA	NA	NA	NA	NA	NA	NA
1170	NA	NA	NA	NA	NA	NA	NA	NA	NA	NA
1171	NA	NA	NA	NA	NA	NA	NA	NA	NA	NA
1173	NA	NA	NA	NA	NA	NA	NA	NA	NA	NA
1174	NA	NA	NA	NA	NA	NA	NA	NA	NA	NA
1175	NA	NA	NA	NA	NA	NA	NA	NA	NA	NA
1176	NA	NA	NA	NA	NA	NA	NA	NA	NA	NA
1177	NA	NA	NA	NA	NA	NA	NA	NA	NA	NA
1178	NA	NA	NA	NA	NA	NA	NA	NA	NA	NA
1179	NA	NA	NA	NA	NA	NA	NA	NA	NA	NA
1180	NA	NA	NA	NA	NA	NA	NA	NA	NA	NA
1181	NA	NA	NA	NA	NA	NA	NA	NA	NA	NA
1182	NA	NA	NA	NA	NA	NA	NA	NA	NA	NA
1183	NA	NA	NA	NA	NA	NA	NA	NA	NA	NA
1184	NA	NA	NA	NA	NA	NA	NA	NA	NA	NA
1185	NA	NA	NA	NA	NA	NA	NA	NA	NA	NA
1186	NA	NA	NA	NA	NA	NA	NA	NA	NA	NA
1187	NA	NA	NA	NA	NA	NA	NA	NA	NA	NA
1188	NA	NA	NA	NA	NA	NA	NA	NA	NA	NA
1189	NA	NA	NA	NA	NA	NA	NA	NA	NA	NA
1190	NA	NA	NA	NA	NA	NA	NA	NA	NA	NA
1191	NA	NA	NA	NA	NA	NA	NA	NA	NA	NA
1192	NA	NA	NA	NA	NA	NA	NA	NA	NA	NA
1195	NA	NA	NA	NA	NA	NA	NA	NA	NA	NA
1196	NA	NA	NA	NA	NA	NA	NA	NA	NA	NA
1197	NA	NA	NA	NA	NA	NA	NA	NA	NA	NA
1198	NA	NA	NA	NA	NA	NA	NA	NA	NA	NA
1199	NA	NA	NA	NA	NA	NA	NA	NA	NA	NA
1200	NA	NA	NA	NA	NA	NA	NA	NA	NA	NA
1201	NA	NA	NA	NA	NA	NA	NA	NA	NA	NA
1202	NA	NA	NA	NA	NA	NA	NA	NA	NA	NA
1203	NA	NA	NA	NA	NA	NA	NA	NA	NA	NA
1205	NA	NA	NA	NA	NA	NA	NA	NA	NA	NA
1209	NA	NA	NA	NA	NA	NA	NA	NA	NA	NA
1210	NA	NA	NA	NA	NA	NA	NA	NA	NA	NA
1211	NA	NA	NA	NA	NA	NA	NA	NA	NA	NA
1215	NA	NA	NA	NA	NA	NA	NA	NA	NA	NA
1217	NA	NA	NA	NA	NA	NA	NA	NA	NA	NA
1218	NA	NA	NA	NA	NA	NA	NA	NA	NA	NA
1219	NA	NA	NA	NA	NA	NA	NA	NA	NA	NA
1231	NA	NA	NA	NA	NA	NA	NA	NA	NA	NA
1235	NA	NA	NA	NA	NA	NA	NA	NA	NA	NA
1238	NA	NA	NA	NA	NA	NA	NA	NA	NA	NA
1240	NA	NA	NA	NA	NA	NA	NA	NA	NA	NA
1241	NA	NA	NA	NA	NA	NA	NA	NA	NA	NA
1242	NA	NA	NA	NA	NA	NA	NA	NA	NA	NA
1243	NA	NA	NA	NA	NA	NA	NA	NA	NA	NA
1258	NA	NA	NA	NA	NA	NA	NA	NA	NA	NA
1259	NA	NA	NA	NA	NA	NA	NA	NA	NA	NA
1260	NA	NA	NA	NA	NA	NA	NA	NA	NA	NA
1261	NA	NA	NA	NA	NA	NA	NA	NA	NA	NA
1262	NA	NA	NA	NA	NA	NA	NA	NA	NA	NA
1263	NA	NA	NA	NA	NA	NA	NA	NA	NA	NA
1264	NA	NA	NA	NA	NA	NA	NA	NA	NA	NA
1265	NA	NA	NA	NA	NA	NA	NA	NA	NA	NA
1266	NA	NA	NA	NA	NA	NA	NA	NA	NA	NA
1267	NA	NA	NA	NA	NA	NA	NA	NA	NA	NA
1268	NA	NA	NA	NA	NA	NA	NA	NA	NA	NA
1269	NA	NA	NA	NA	NA	NA	NA	NA	NA	NA
1273	NA	NA	NA	NA	NA	NA	NA	NA	NA	NA
1292	NA	NA	NA	NA	NA	NA	NA	NA	NA	NA
1294	NA	NA	NA	NA	NA	NA	NA	NA	NA	NA
1295	NA	NA	NA	NA	NA	NA	NA	NA	NA	NA
1296	NA	NA	NA	NA	NA	NA	NA	NA	NA	NA
1297	NA	NA	NA	NA	NA	NA	NA	NA	NA	NA
1306	NA	NA	NA	NA	NA	NA	NA	NA	NA	NA
1311	NA	NA	NA	NA	NA	NA	NA	NA	NA	NA
1312	NA	NA	NA	NA	NA	NA	NA	NA	NA	NA
1313	NA	NA	NA	NA	NA	NA	NA	NA	NA	NA
1314	NA	NA	NA	NA	NA	NA	NA	NA	NA	NA
1315	NA	NA	NA	NA	NA	NA	NA	NA	NA	NA
1316	NA	NA	NA	NA	NA	NA	NA	NA	NA	NA
1317	NA	NA	NA	NA	NA	NA	NA	NA	NA	NA
2362	NA	NA	NA	NA	NA	NA	NA	NA	NA	NA
2363	NA	NA	NA	NA	NA	NA	NA	NA	NA	NA
2364	NA	NA	NA	NA	NA	NA	NA	NA	NA	NA
2365	NA	NA	NA	NA	NA	NA	NA	NA	NA	NA
2366	NA	NA	NA	NA	NA	NA	NA	NA	NA	NA
2367	NA	NA	NA	NA	NA	NA	NA	NA	NA	NA
2378	NA	NA	NA	NA	NA	NA	NA	NA	NA	NA
2380	NA	NA	NA	NA	NA	NA	NA	NA	NA	NA
2411	NA	NA	NA	NA	NA	NA	NA	NA	NA	NA
2414	NA	NA	NA	NA	NA	NA	NA	NA	NA	NA
2422	NA	NA	NA	NA	NA	NA	NA	NA	NA	NA
2425	NA	NA	NA	NA	NA	NA	NA	NA	NA	NA
2426	NA	NA	NA	NA	NA	NA	NA	NA	NA	NA
2427	NA	NA	NA	NA	NA	NA	NA	NA	NA	NA
2449	NA	NA	NA	NA	NA	NA	NA	NA	NA	NA
2873	NA	NA	NA	NA	NA	NA	NA	NA	NA	NA
2875	5	NA	NA	NA	NA	NA	NA	NA	NA	NA
2877	NA	NA	NA	NA	NA	NA	NA	NA	NA	NA
2880	NA	NA	NA	NA	NA	NA	NA	NA	NA	NA
2881	NA	NA	NA	NA	NA	NA	NA	NA	NA	NA
2884	NA	NA	NA	NA	NA	NA	NA	NA	NA	NA
2885	NA	NA	NA	NA	NA	NA	NA	NA	NA	NA
2886	NA	NA	NA	NA	NA	NA	NA	NA	NA	NA
2887	NA	NA	NA	NA	NA	NA	NA	NA	NA	NA
2888	NA	NA	NA	NA	NA	NA	NA	NA	NA	NA
2889	NA	NA	NA	NA	NA	NA	NA	NA	NA	NA
2890	NA	NA	NA	NA	NA	NA	NA	NA	NA	NA
2892	NA	NA	NA	NA	NA	NA	NA	NA	NA	NA
2905	7	6	6	6	6	6	6	4	6	4
2906	5	NA	NA	NA	NA	NA	NA	NA	NA	NA
2907	7	2	2	2	2	2	1	4	2	2
2908	7	6	6	6	6	6	6	6	6	4
2909	7	6	6	6	5	6	6	6	6	6
2910	1	1	5	1	1	1	4	4	3	3
2911	4	3	2	2	4	3	3	2	1	4
2913	NA	NA	NA	NA	NA	NA	NA	NA	NA	NA
2915	4	3	3	3	3	3	4	4	4	4
2916	NA	NA	NA	NA	NA	NA	NA	NA	NA	NA
2917	NA	NA	NA	NA	NA	NA	NA	NA	NA	NA
2918	4	5	5	4	4	4	1	4	4	4
2919	5	2	2	3	2	2	1	1	1	NA
2920	NA	NA	NA	NA	NA	NA	NA	NA	NA	NA
2921	7	3	3	3	1	1	2	2	2	2
2922	6	1	1	1	1	1	1	1	1	1
2923	5	1	1	3	1	1	6	2	5	3
2924	3	3	4	3	2	2	2	1	2	2
2925	5	3	3	3	3	4	2	2	2	2
2926	6	6	6	6	6	6	6	6	6	6
2927	3	2	2	2	2	2	1	1	1	2
2929	2	2	3	2	2	2	1	2	1	1
3011	4	NA	NA	NA	NA	NA	NA	NA	NA	NA
3012	NA	NA	NA	NA	NA	NA	NA	NA	NA	NA
3013	3	NA	NA	NA	NA	NA	NA	NA	NA	NA
3014	NA	NA	NA	NA	NA	NA	NA	NA	NA	NA
3015	NA	NA	NA	NA	NA	NA	NA	NA	NA	NA
3016	NA	NA	NA	NA	NA	NA	NA	NA	NA	NA
3017	2	NA	NA	NA	NA	NA	NA	NA	NA	NA
3018	NA	NA	NA	NA	NA	NA	NA	NA	NA	NA
3020	5	NA	NA	NA	NA	NA	NA	NA	NA	NA
3021	NA	NA	NA	NA	NA	NA	NA	NA	NA	NA
3022	NA	NA	NA	NA	NA	NA	NA	NA	NA	NA
3023	NA	NA	NA	NA	NA	NA	NA	NA	NA	NA
3024	NA	NA	NA	NA	NA	NA	NA	NA	NA	NA
3027	NA	NA	NA	NA	NA	NA	NA	NA	NA	NA
3028	4	NA	NA	NA	NA	NA	NA	NA	NA	NA
3029	4	NA	NA	NA	NA	NA	NA	NA	NA	NA
3031	5	NA	NA	NA	NA	NA	NA	NA	NA	NA
3032	4	NA	NA	NA	NA	NA	NA	NA	NA	NA
3033	4	NA	NA	NA	NA	NA	NA	NA	NA	NA
3034	2	NA	NA	NA	NA	NA	NA	NA	NA	NA
3037	7	NA	NA	NA	NA	NA	NA	NA	NA	NA
3038	5	NA	NA	NA	NA	NA	NA	NA	NA	NA
3039	2	NA	NA	NA	NA	NA	NA	NA	NA	NA
3040	5	NA	NA	NA	NA	NA	NA	NA	NA	NA
3070	5	NA	NA	NA	NA	NA	NA	NA	NA	NA
3071	4	NA	NA	NA	NA	NA	NA	NA	NA	NA
3075	5	NA	NA	NA	NA	NA	NA	NA	NA	NA
3076	7	NA	NA	NA	NA	NA	NA	NA	NA	NA
3077	NA	NA	NA	NA	NA	NA	NA	NA	NA	NA
3078	6	NA	NA	NA	NA	NA	NA	NA	NA	NA
3079	1	NA	NA	NA	NA	NA	NA	NA	NA	NA
3080	6	NA	NA	NA	NA	NA	NA	NA	NA	NA
3081	6	NA	NA	NA	NA	NA	NA	NA	NA	NA
3082	2	NA	NA	NA	NA	NA	NA	NA	NA	NA
3083	NA	NA	NA	NA	NA	NA	NA	NA	NA	NA
3084	1	NA	NA	NA	NA	NA	NA	NA	NA	NA
3085	4	NA	NA	NA	NA	NA	NA	NA	NA	NA
3086	NA	NA	NA	NA	NA	NA	NA	NA	NA	NA
3087	NA	NA	NA	NA	NA	NA	NA	NA	NA	NA
3089	3	NA	NA	NA	NA	NA	NA	NA	NA	NA
3090	5	NA	NA	NA	NA	NA	NA	NA	NA	NA
3092	7	NA	NA	NA	NA	NA	NA	NA	NA	NA
3093	3	NA	NA	NA	NA	NA	NA	NA	NA	NA
3094	4	NA	NA	NA	NA	NA	NA	NA	NA	NA
3095	5	NA	NA	NA	NA	NA	NA	NA	NA	NA
3096	5	NA	NA	NA	NA	NA	NA	NA	NA	NA
3097	5	NA	NA	NA	NA	NA	NA	NA	NA	NA
3098	5	NA	NA	NA	NA	NA	NA	NA	NA	NA
3099	5	NA	NA	NA	NA	NA	NA	NA	NA	NA
3100	NA	NA	NA	NA	NA	NA	NA	NA	NA	NA
3103	4	NA	NA	NA	NA	NA	NA	NA	NA	NA
3104	NA	NA	NA	NA	NA	NA	NA	NA	NA	NA
3108	3	NA	NA	NA	NA	NA	NA	NA	NA	NA
3109	4	NA	NA	NA	NA	NA	NA	NA	NA	NA
3111	NA	NA	NA	NA	NA	NA	NA	NA	NA	NA
3115	5	NA	NA	NA	NA	NA	NA	NA	NA	NA
3116	5	NA	NA	NA	NA	NA	NA	NA	NA	NA
3118	4	NA	NA	NA	NA	NA	NA	NA	NA	NA
3119	NA	NA	NA	NA	NA	NA	NA	NA	NA	NA
3120	1	NA	NA	NA	NA	NA	NA	NA	NA	NA
3121	5	NA	NA	NA	NA	NA	NA	NA	NA	NA
3122	7	NA	NA	NA	NA	NA	NA	NA	NA	NA
3124	NA	NA	NA	NA	NA	NA	NA	NA	NA	NA
3125	6	NA	NA	NA	NA	NA	NA	NA	NA	NA
3126	5	NA	NA	NA	NA	NA	NA	NA	NA	NA
3128	5	NA	NA	NA	NA	NA	NA	NA	NA	NA
3157	NA	NA	NA	NA	NA	NA	NA	NA	NA	NA
3159	NA	NA	NA	NA	NA	NA	NA	NA	NA	NA
3161	NA	NA	NA	NA	NA	NA	NA	NA	NA	NA
3162	NA	NA	NA	NA	NA	NA	NA	NA	NA	NA
3163	NA	NA	NA	NA	NA	NA	NA	NA	NA	NA
3164	NA	NA	NA	NA	NA	NA	NA	NA	NA	NA
3165	NA	NA	NA	NA	NA	NA	NA	NA	NA	NA
3166	NA	NA	NA	NA	NA	NA	NA	NA	NA	NA
3167	NA	NA	NA	NA	NA	NA	NA	NA	NA	NA
3168	NA	NA	NA	NA	NA	NA	NA	NA	NA	NA
3169	NA	NA	NA	NA	NA	NA	NA	NA	NA	NA
3170	NA	NA	NA	NA	NA	NA	NA	NA	NA	NA
3174	NA	NA	NA	NA	NA	NA	NA	NA	NA	NA
3176	NA	NA	NA	NA	NA	NA	NA	NA	NA	NA
3177	NA	NA	NA	NA	NA	NA	NA	NA	NA	NA
3179	NA	NA	NA	NA	NA	NA	NA	NA	NA	NA
3181	NA	NA	NA	NA	NA	NA	NA	NA	NA	NA
3182	NA	NA	NA	NA	NA	NA	NA	NA	NA	NA
3184	NA	NA	NA	NA	NA	NA	NA	NA	NA	NA
3187	NA	NA	NA	NA	NA	NA	NA	NA	NA	NA
3189	NA	NA	NA	NA	NA	NA	NA	NA	NA	NA
3190	NA	NA	NA	NA	NA	NA	NA	NA	NA	NA
3191	NA	NA	NA	NA	NA	NA	NA	NA	NA	NA
3192	NA	NA	NA	NA	NA	NA	NA	NA	NA	NA
3193	NA	NA	NA	NA	NA	NA	NA	NA	NA	NA
3195	NA	NA	NA	NA	NA	NA	NA	NA	NA	NA
3197	NA	NA	NA	NA	NA	NA	NA	NA	NA	NA
3199	NA	NA	NA	NA	NA	NA	NA	NA	NA	NA
3200	NA	NA	NA	NA	NA	NA	NA	NA	NA	NA
3201	NA	NA	NA	NA	NA	NA	NA	NA	NA	NA
3203	NA	NA	NA	NA	NA	NA	NA	NA	NA	NA
3204	NA	NA	NA	NA	NA	NA	NA	NA	NA	NA
3205	NA	NA	NA	NA	NA	NA	NA	NA	NA	NA
3206	NA	NA	NA	NA	NA	NA	NA	NA	NA	NA
3207	NA	NA	NA	NA	NA	NA	NA	NA	NA	NA
3208	NA	NA	NA	NA	NA	NA	NA	NA	NA	NA
3209	NA	NA	NA	NA	NA	NA	NA	NA	NA	NA
3210	NA	NA	NA	NA	NA	NA	NA	NA	NA	NA
3212	NA	NA	NA	NA	NA	NA	NA	NA	NA	NA
3213	NA	NA	NA	NA	NA	NA	NA	NA	NA	NA
3214	NA	NA	NA	NA	NA	NA	NA	NA	NA	NA
3215	NA	NA	NA	NA	NA	NA	NA	NA	NA	NA
3216	NA	NA	NA	NA	NA	NA	NA	NA	NA	NA
3217	NA	NA	NA	NA	NA	NA	NA	NA	NA	NA
3218	NA	NA	NA	NA	NA	NA	NA	NA	NA	NA
3219	NA	NA	NA	NA	NA	NA	NA	NA	NA	NA
3220	NA	NA	NA	NA	NA	NA	NA	NA	NA	NA
3221	NA	NA	NA	NA	NA	NA	NA	NA	NA	NA
3222	NA	NA	NA	NA	NA	NA	NA	NA	NA	NA
3224	NA	NA	NA	NA	NA	NA	NA	NA	NA	NA
3225	NA	NA	NA	NA	NA	NA	NA	NA	NA	NA
3226	NA	NA	NA	NA	NA	NA	NA	NA	NA	NA
3227	NA	NA	NA	NA	NA	NA	NA	NA	NA	NA
3228	NA	NA	NA	NA	NA	NA	NA	NA	NA	NA
3430	NA	NA	NA	NA	NA	NA	NA	NA	NA	NA
3431	NA	NA	NA	NA	NA	NA	NA	NA	NA	NA
3432	NA	NA	NA	NA	NA	NA	NA	NA	NA	NA
3433	NA	NA	NA	NA	NA	NA	NA	NA	NA	NA
3434	NA	NA	NA	NA	NA	NA	NA	NA	NA	NA
3435	NA	NA	NA	NA	NA	NA	NA	NA	NA	NA
3436	NA	NA	NA	NA	NA	NA	NA	NA	NA	NA
3437	NA	NA	NA	NA	NA	NA	NA	NA	NA	NA
3438	NA	NA	NA	NA	NA	NA	NA	NA	NA	NA
3439	NA	NA	NA	NA	NA	NA	NA	NA	NA	NA
3440	NA	NA	NA	NA	NA	NA	NA	NA	NA	NA
3441	NA	NA	NA	NA	NA	NA	NA	NA	NA	NA
3442	NA	NA	NA	NA	NA	NA	NA	NA	NA	NA
3443	NA	NA	NA	NA	NA	NA	NA	NA	NA	NA
3444	NA	NA	NA	NA	NA	NA	NA	NA	NA	NA
3445	NA	NA	NA	NA	NA	NA	NA	NA	NA	NA
3446	NA	NA	NA	NA	NA	NA	NA	NA	NA	NA
3447	NA	NA	NA	NA	NA	NA	NA	NA	NA	NA
3448	NA	NA	NA	NA	NA	NA	NA	NA	NA	NA
3449	NA	NA	NA	NA	NA	NA	NA	NA	NA	NA
3450	NA	NA	NA	NA	NA	NA	NA	NA	NA	NA
3451	NA	NA	NA	NA	NA	NA	NA	NA	NA	NA
3452	NA	NA	NA	NA	NA	NA	NA	NA	NA	NA
3453	NA	NA	NA	NA	NA	NA	NA	NA	NA	NA
3454	NA	NA	NA	NA	NA	NA	NA	NA	NA	NA
3456	NA	NA	NA	NA	NA	NA	NA	NA	NA	NA
3457	NA	NA	NA	NA	NA	NA	NA	NA	NA	NA
3458	NA	NA	NA	NA	NA	NA	NA	NA	NA	NA
3459	NA	NA	NA	NA	NA	NA	NA	NA	NA	NA
3460	NA	NA	NA	NA	NA	NA	NA	NA	NA	NA
3462	NA	NA	NA	NA	NA	NA	NA	NA	NA	NA
3463	NA	NA	NA	NA	NA	NA	NA	NA	NA	NA
3464	NA	NA	NA	NA	NA	NA	NA	NA	NA	NA
3467	NA	NA	NA	NA	NA	NA	NA	NA	NA	NA
3468	NA	NA	NA	NA	NA	NA	NA	NA	NA	NA
3469	NA	NA	NA	NA	NA	NA	NA	NA	NA	NA
3470	NA	NA	NA	NA	NA	NA	NA	NA	NA	NA
3471	NA	NA	NA	NA	NA	NA	NA	NA	NA	NA
3472	NA	NA	NA	NA	NA	NA	NA	NA	NA	NA
3473	NA	NA	NA	NA	NA	NA	NA	NA	NA	NA
3474	NA	NA	NA	NA	NA	NA	NA	NA	NA	NA
3475	NA	NA	NA	NA	NA	NA	NA	NA	NA	NA
3476	NA	NA	NA	NA	NA	NA	NA	NA	NA	NA
3477	NA	NA	NA	NA	NA	NA	NA	NA	NA	NA
3478	NA	NA	NA	NA	NA	NA	NA	NA	NA	NA
3479	NA	NA	NA	NA	NA	NA	NA	NA	NA	NA
3480	NA	NA	NA	NA	NA	NA	NA	NA	NA	NA
3481	NA	NA	NA	NA	NA	NA	NA	NA	NA	NA
3482	NA	NA	NA	NA	NA	NA	NA	NA	NA	NA
3483	NA	NA	NA	NA	NA	NA	NA	NA	NA	NA
3510	4	4	4	4	4	4	4	4	4	4
3511	NA	NA	NA	NA	NA	NA	NA	NA	NA	NA
3513	1	3	2	1	2	2	2	2	2	2
3516	NA	NA	NA	NA	NA	NA	NA	NA	NA	NA
3517	3	5	4	3	5	4	5	4	5	4
3520	1	1	1	1	1	1	1	1	1	1
3521	2	3	4	2	4	4	2	4	4	4
3524	NA	NA	NA	NA	NA	NA	NA	NA	NA	NA
3525	2	1	1	1	1	1	1	4	1	1
3526	5	3	3	3	4	2	4	4	4	4
3527	3	4	3	1	3	4	1	4	5	6
3531	1	NA	NA	NA	NA	NA	NA	NA	NA	NA
3534	1	4	4	4	4	4	4	4	4	4
3561	NA	NA	NA	NA	NA	NA	NA	NA	NA	NA
3562	1	2	4	2	3	2	1	2	2	2
3563	3	4	4	4	4	3	3	2	2	2
3564	NA	NA	NA	NA	NA	NA	NA	NA	NA	NA
3567	1	1	1	1	1	1	1	3	1	1
3568	NA	NA	NA	NA	NA	NA	NA	NA	NA	NA
3570	4	3	3	3	3	3	1	4	1	1
3571	1	1	1	1	1	1	1	1	1	1
3572	NA	NA	NA	NA	NA	NA	NA	NA	NA	NA
3573	4	3	4	4	4	3	3	2	2	2
3575	1	3	3	3	3	3	1	1	1	1
3577	NA	NA	NA	NA	NA	NA	NA	NA	NA	NA
3580	1	2	2	2	3	2	1	2	2	3
3581	3	3	3	1	3	3	1	2	3	2
3582	4	5	5	4	5	4	4	4	4	4
3584	NA	NA	NA	NA	NA	NA	NA	NA	NA	NA
3586	2	6	5	4	5	4	1	2	2	2
3587	7	5	4	3	4	4	3	3	3	4
3588	7	3	4	2	3	3	3	4	4	2
3796	3	NA	NA	NA	NA	NA	NA	NA	NA	NA
3797	1	NA	NA	NA	NA	NA	NA	NA	NA	NA
3799	4	NA	NA	NA	NA	NA	NA	NA	NA	NA
3801	5	NA	NA	NA	NA	NA	NA	NA	NA	NA
3802	7	NA	NA	NA	NA	NA	NA	NA	NA	NA
3803	1	NA	NA	NA	NA	NA	NA	NA	NA	NA
3804	4	NA	NA	NA	NA	NA	NA	NA	NA	NA
3806	3	NA	NA	NA	NA	NA	NA	NA	NA	NA
3807	1	NA	NA	NA	NA	NA	NA	NA	NA	NA
3809	3	NA	NA	NA	NA	NA	NA	NA	NA	NA
3810	4	NA	NA	NA	NA	NA	NA	NA	NA	NA
3811	4	NA	NA	NA	NA	NA	NA	NA	NA	NA
3812	7	NA	NA	NA	NA	NA	NA	NA	NA	NA
3813	5	NA	NA	NA	NA	NA	NA	NA	NA	NA
3816	7	NA	NA	NA	NA	NA	NA	NA	NA	NA
3817	4	NA	NA	NA	NA	NA	NA	NA	NA	NA
3818	7	NA	NA	NA	NA	NA	NA	NA	NA	NA
3820	3	NA	NA	NA	NA	NA	NA	NA	NA	NA
3821	3	NA	NA	NA	NA	NA	NA	NA	NA	NA
3822	6	NA	NA	NA	NA	NA	NA	NA	NA	NA
3823	6	NA	NA	NA	NA	NA	NA	NA	NA	NA
3824	NA	NA	NA	NA	NA	NA	NA	NA	NA	NA
3825	3	NA	NA	NA	NA	NA	NA	NA	NA	NA
3826	1	NA	NA	NA	NA	NA	NA	NA	NA	NA
3828	1	NA	NA	NA	NA	NA	NA	NA	NA	NA
3829	1	NA	NA	NA	NA	NA	NA	NA	NA	NA
3830	4	NA	NA	NA	NA	NA	NA	NA	NA	NA
3831	3	NA	NA	NA	NA	NA	NA	NA	NA	NA
3832	NA	NA	NA	NA	NA	NA	NA	NA	NA	NA
3833	6	NA	NA	NA	NA	NA	NA	NA	NA	NA
3834	NA	NA	NA	NA	NA	NA	NA	NA	NA	NA
3835	NA	NA	NA	NA	NA	NA	NA	NA	NA	NA
3836	NA	NA	NA	NA	NA	NA	NA	NA	NA	NA
3837	NA	NA	NA	NA	NA	NA	NA	NA	NA	NA
3838	NA	NA	NA	NA	NA	NA	NA	NA	NA	NA
3839	NA	NA	NA	NA	NA	NA	NA	NA	NA	NA
3840	NA	NA	NA	NA	NA	NA	NA	NA	NA	NA
3841	NA	NA	NA	NA	NA	NA	NA	NA	NA	NA
3842	NA	NA	NA	NA	NA	NA	NA	NA	NA	NA
3843	NA	NA	NA	NA	NA	NA	NA	NA	NA	NA
3845	NA	NA	NA	NA	NA	NA	NA	NA	NA	NA
3846	NA	NA	NA	NA	NA	NA	NA	NA	NA	NA
3848	NA	NA	NA	NA	NA	NA	NA	NA	NA	NA
3849	NA	NA	NA	NA	NA	NA	NA	NA	NA	NA
3850	NA	NA	NA	NA	NA	NA	NA	NA	NA	NA
3851	NA	NA	NA	NA	NA	NA	NA	NA	NA	NA
3853	NA	NA	NA	NA	NA	NA	NA	NA	NA	NA
3854	NA	NA	NA	NA	NA	NA	NA	NA	NA	NA
3855	NA	NA	NA	NA	NA	NA	NA	NA	NA	NA
3856	NA	NA	NA	NA	NA	NA	NA	NA	NA	NA
3858	NA	NA	NA	NA	NA	NA	NA	NA	NA	NA
3863	5	NA	NA	NA	NA	NA	NA	NA	NA	NA
3864	1	2	3	2	1	2	1	2	2	1
3865	7	4	4	3	3	2	1	4	2	4
3867	NA	NA	NA	NA	NA	NA	NA	NA	NA	NA
3868	1	1	1	1	1	1	1	1	1	1
3869	NA	NA	NA	NA	NA	NA	NA	NA	NA	NA
3871	NA	NA	NA	NA	NA	NA	NA	NA	NA	NA
3872	NA	NA	NA	NA	NA	NA	NA	NA	NA	NA
3874	NA	NA	NA	NA	NA	NA	NA	NA	NA	NA
3875	NA	NA	NA	NA	NA	NA	NA	NA	NA	NA
3877	7	3	3	3	6	4	1	3	3	3
3878	1	1	1	1	2	1	1	2	1	1
3879	3	4	4	4	4	3	5	4	5	2
3880	NA	NA	NA	NA	NA	NA	NA	NA	NA	NA
3882	7	4	5	3	4	2	1	1	1	1
3885	6	6	6	6	6	6	4	1	1	1
3886	2	6	6	4	4	6	6	4	5	6
3887	NA	NA	NA	NA	NA	NA	NA	NA	NA	NA
3888	NA	NA	NA	NA	NA	NA	NA	NA	NA	NA
3890	5	3	3	2	2	4	2	3	2	4
3891	NA	NA	NA	NA	NA	NA	NA	NA	NA	NA
3892	2	1	1	1	1	1	1	1	1	1
3893	5	1	1	1	1	1	1	1	1	1
3894	4	3	3	3	3	3	3	2	2	4
3896	NA	NA	NA	NA	NA	NA	NA	NA	NA	NA
3897	NA	NA	NA	NA	NA	NA	NA	NA	NA	NA
3898	4	4	4	3	3	4	6	2	6	2
3901	3	2	1	1	2	1	2	2	1	3
3902	3	3	3	3	2	3	3	3	2	2
3903	2	2	3	2	3	2	1	1	1	1
3905	4	1	2	1	1	2	1	2	1	1
3906	1	4	3	1	3	4	1	2	1	1
3907	4	1	1	1	1	1	2	3	1	2
3909	4	3	3	4	3	3	4	4	3	3
3911	3	4	4	4	4	4	1	2	3	3
3913	2	1	2	1	2	1	1	1	1	1
3914	4	3	3	3	3	4	1	2	2	2
3915	NA	NA	NA	NA	NA	NA	NA	NA	NA	NA
3916	NA	NA	NA	NA	NA	NA	NA	NA	NA	NA
3918	NA	NA	NA	NA	NA	NA	NA	NA	NA	NA
3919	7	5	4	3	3	4	2	1	6	3
3920	NA	NA	NA	NA	NA	NA	NA	NA	NA	NA
3921	NA	NA	NA	NA	NA	NA	NA	NA	NA	NA
3922	4	5	4	2	4	4	5	4	4	3
3923	NA	NA	NA	NA	NA	NA	NA	NA	NA	NA
3924	NA	NA	NA	NA	NA	NA	NA	NA	NA	NA
3925	NA	NA	NA	NA	NA	NA	NA	NA	NA	NA
3926	NA	NA	NA	NA	NA	NA	NA	NA	NA	NA
3927	NA	NA	NA	NA	NA	NA	NA	NA	NA	NA
3928	NA	NA	NA	NA	NA	NA	NA	NA	NA	NA
3929	NA	NA	NA	NA	NA	NA	NA	NA	NA	NA
3930	NA	NA	NA	NA	NA	NA	NA	NA	NA	NA
3931	NA	NA	NA	NA	NA	NA	NA	NA	NA	NA
3932	NA	NA	NA	NA	NA	NA	NA	NA	NA	NA
3933	NA	NA	NA	NA	NA	NA	NA	NA	NA	NA
3936	NA	NA	NA	NA	NA	NA	NA	NA	NA	NA
3937	NA	NA	NA	NA	NA	NA	NA	NA	NA	NA
3938	NA	NA	NA	NA	NA	NA	NA	NA	NA	NA
3939	NA	NA	NA	NA	NA	NA	NA	NA	NA	NA
3940	NA	NA	NA	NA	NA	NA	NA	NA	NA	NA
3941	NA	NA	NA	NA	NA	NA	NA	NA	NA	NA
3942	NA	NA	NA	NA	NA	NA	NA	NA	NA	NA
3943	NA	NA	NA	NA	NA	NA	NA	NA	NA	NA
3945	NA	NA	NA	NA	NA	NA	NA	NA	NA	NA
3946	NA	NA	NA	NA	NA	NA	NA	NA	NA	NA
3948	NA	NA	NA	NA	NA	NA	NA	NA	NA	NA
3949	NA	NA	NA	NA	NA	NA	NA	NA	NA	NA
3950	NA	NA	NA	NA	NA	NA	NA	NA	NA	NA
3951	NA	NA	NA	NA	NA	NA	NA	NA	NA	NA
3952	NA	NA	NA	NA	NA	NA	NA	NA	NA	NA
3954	NA	NA	NA	NA	NA	NA	NA	NA	NA	NA
3955	NA	NA	NA	NA	NA	NA	NA	NA	NA	NA
3956	NA	NA	NA	NA	NA	NA	NA	NA	NA	NA
3957	NA	NA	NA	NA	NA	NA	NA	NA	NA	NA
3958	NA	NA	NA	NA	NA	NA	NA	NA	NA	NA
3959	NA	NA	NA	NA	NA	NA	NA	NA	NA	NA
3960	NA	NA	NA	NA	NA	NA	NA	NA	NA	NA
3961	NA	NA	NA	NA	NA	NA	NA	NA	NA	NA
3962	NA	NA	NA	NA	NA	NA	NA	NA	NA	NA
3964	NA	NA	NA	NA	NA	NA	NA	NA	NA	NA
3966	NA	NA	NA	NA	NA	NA	NA	NA	NA	NA
3967	NA	NA	NA	NA	NA	NA	NA	NA	NA	NA
3968	NA	NA	NA	NA	NA	NA	NA	NA	NA	NA
3969	NA	NA	NA	NA	NA	NA	NA	NA	NA	NA
3970	NA	NA	NA	NA	NA	NA	NA	NA	NA	NA
3972	NA	NA	NA	NA	NA	NA	NA	NA	NA	NA
3973	NA	NA	NA	NA	NA	NA	NA	NA	NA	NA
3975	NA	NA	NA	NA	NA	NA	NA	NA	NA	NA
3976	NA	NA	NA	NA	NA	NA	NA	NA	NA	NA
3979	NA	NA	NA	NA	NA	NA	NA	NA	NA	NA
3980	NA	NA	NA	NA	NA	NA	NA	NA	NA	NA
3981	NA	NA	NA	NA	NA	NA	NA	NA	NA	NA
3982	NA	NA	NA	NA	NA	NA	NA	NA	NA	NA
3983	NA	NA	NA	NA	NA	NA	NA	NA	NA	NA
3984	NA	NA	NA	NA	NA	NA	NA	NA	NA	NA
3985	NA	NA	NA	NA	NA	NA	NA	NA	NA	NA
3987	NA	NA	NA	NA	NA	NA	NA	NA	NA	NA
3988	NA	NA	NA	NA	NA	NA	NA	NA	NA	NA
3991	NA	NA	NA	NA	NA	NA	NA	NA	NA	NA
3992	NA	NA	NA	NA	NA	NA	NA	NA	NA	NA
3993	NA	NA	NA	NA	NA	NA	NA	NA	NA	NA
3994	NA	NA	NA	NA	NA	NA	NA	NA	NA	NA
3995	NA	NA	NA	NA	NA	NA	NA	NA	NA	NA
3996	NA	NA	NA	NA	NA	NA	NA	NA	NA	NA
3997	NA	NA	NA	NA	NA	NA	NA	NA	NA	NA
3999	NA	NA	NA	NA	NA	NA	NA	NA	NA	NA
4001	NA	NA	NA	NA	NA	NA	NA	NA	NA	NA
4002	NA	NA	NA	NA	NA	NA	NA	NA	NA	NA
4003	NA	NA	NA	NA	NA	NA	NA	NA	NA	NA
4005	NA	NA	NA	NA	NA	NA	NA	NA	NA	NA
4006	NA	NA	NA	NA	NA	NA	NA	NA	NA	NA
4007	NA	NA	NA	NA	NA	NA	NA	NA	NA	NA
4010	NA	NA	NA	NA	NA	NA	NA	NA	NA	NA
4011	NA	NA	NA	NA	NA	NA	NA	NA	NA	NA
4012	NA	NA	NA	NA	NA	NA	NA	NA	NA	NA
4013	NA	NA	NA	NA	NA	NA	NA	NA	NA	NA
4015	NA	NA	NA	NA	NA	NA	NA	NA	NA	NA
4016	NA	NA	NA	NA	NA	NA	NA	NA	NA	NA
4017	NA	NA	NA	NA	NA	NA	NA	NA	NA	NA
4019	NA	NA	NA	NA	NA	NA	NA	NA	NA	NA
4020	NA	NA	NA	NA	NA	NA	NA	NA	NA	NA
4021	NA	NA	NA	NA	NA	NA	NA	NA	NA	NA
4023	NA	NA	NA	NA	NA	NA	NA	NA	NA	NA
4024	NA	NA	NA	NA	NA	NA	NA	NA	NA	NA
4025	NA	NA	NA	NA	NA	NA	NA	NA	NA	NA
4026	NA	NA	NA	NA	NA	NA	NA	NA	NA	NA
4028	NA	NA	NA	NA	NA	NA	NA	NA	NA	NA
4029	NA	NA	NA	NA	NA	NA	NA	NA	NA	NA
4030	NA	NA	NA	NA	NA	NA	NA	NA	NA	NA
4031	NA	NA	NA	NA	NA	NA	NA	NA	NA	NA
4033	NA	NA	NA	NA	NA	NA	NA	NA	NA	NA
4035	NA	NA	NA	NA	NA	NA	NA	NA	NA	NA
4037	NA	NA	NA	NA	NA	NA	NA	NA	NA	NA
4038	NA	NA	NA	NA	NA	NA	NA	NA	NA	NA
4039	NA	NA	NA	NA	NA	NA	NA	NA	NA	NA
4040	NA	NA	NA	NA	NA	NA	NA	NA	NA	NA
4041	NA	NA	NA	NA	NA	NA	NA	NA	NA	NA
4042	NA	NA	NA	NA	NA	NA	NA	NA	NA	NA
4044	NA	NA	NA	NA	NA	NA	NA	NA	NA	NA
4045	NA	NA	NA	NA	NA	NA	NA	NA	NA	NA
4046	NA	NA	NA	NA	NA	NA	NA	NA	NA	NA
4047	NA	NA	NA	NA	NA	NA	NA	NA	NA	NA
4048	NA	NA	NA	NA	NA	NA	NA	NA	NA	NA
4049	NA	NA	NA	NA	NA	NA	NA	NA	NA	NA
4051	NA	NA	NA	NA	NA	NA	NA	NA	NA	NA
4052	NA	NA	NA	NA	NA	NA	NA	NA	NA	NA
4053	NA	NA	NA	NA	NA	NA	NA	NA	NA	NA
4054	NA	NA	NA	NA	NA	NA	NA	NA	NA	NA
4055	NA	NA	NA	NA	NA	NA	NA	NA	NA	NA
4056	NA	NA	NA	NA	NA	NA	NA	NA	NA	NA
4060	4	5	4	4	4	4	3	4	5	5
4062	5	4	4	4	3	2	1	4	1	1
4063	7	6	6	6	6	6	6	5	6	6
4064	4	5	5	5	5	5	5	4	6	6
4065	NA	NA	NA	NA	NA	NA	NA	NA	NA	NA
4066	7	4	4	3	4	4	1	3	1	1
4067	3	6	4	4	4	5	4	5	5	4
4068	4	5	5	5	5	5	6	6	6	4
4069	5	3	3	2	2	3	1	1	1	1
4070	4	5	5	5	6	5	3	4	3	6
4071	5	5	5	5	4	5	2	2	3	3
4073	NA	NA	NA	NA	NA	NA	NA	NA	NA	NA
4074	7	5	4	4	4	5	4	4	4	4
4075	NA	NA	NA	NA	NA	NA	NA	NA	NA	NA
4076	5	5	4	6	6	4	4	4	4	5
4077	7	NA	NA	NA	NA	NA	NA	NA	NA	NA
4078	7	6	5	6	3	1	4	1	6	6
4079	3	6	6	6	6	6	2	2	2	2
4080	7	6	5	6	5	5	2	4	4	4
4081	4	6	4	5	5	4	4	4	4	4
4082	5	4	4	3	3	3	3	2	3	3
4084	6	2	2	1	1	2	1	2	1	1
4085	NA	NA	NA	NA	NA	NA	NA	NA	NA	NA
4086	5	6	6	6	6	6	6	3	6	6
4088	6	5	4	5	4	5	4	3	3	3
4089	7	6	6	5	6	5	1	1	2	2
4090	3	5	4	4	4	5	4	5	4	3
4091	NA	NA	NA	NA	NA	NA	NA	NA	NA	NA
4092	NA	NA	NA	NA	NA	NA	NA	NA	NA	NA
4093	NA	NA	NA	NA	NA	NA	NA	NA	NA	NA
4094	NA	NA	NA	NA	NA	NA	NA	NA	NA	NA
4095	NA	NA	NA	NA	NA	NA	NA	NA	NA	NA
4097	NA	NA	NA	NA	NA	NA	NA	NA	NA	NA
4098	NA	NA	NA	NA	NA	NA	NA	NA	NA	NA
4099	NA	NA	NA	NA	NA	NA	NA	NA	NA	NA
4101	NA	NA	NA	NA	NA	NA	NA	NA	NA	NA
4102	NA	NA	NA	NA	NA	NA	NA	NA	NA	NA
4103	NA	NA	NA	NA	NA	NA	NA	NA	NA	NA
4105	NA	NA	NA	NA	NA	NA	NA	NA	NA	NA
4107	NA	NA	NA	NA	NA	NA	NA	NA	NA	NA
4108	NA	NA	NA	NA	NA	NA	NA	NA	NA	NA
4109	NA	NA	NA	NA	NA	NA	NA	NA	NA	NA
4110	NA	NA	NA	NA	NA	NA	NA	NA	NA	NA
4111	NA	NA	NA	NA	NA	NA	NA	NA	NA	NA
4112	NA	NA	NA	NA	NA	NA	NA	NA	NA	NA
4114	NA	NA	NA	NA	NA	NA	NA	NA	NA	NA
4115	NA	NA	NA	NA	NA	NA	NA	NA	NA	NA
4116	NA	NA	NA	NA	NA	NA	NA	NA	NA	NA
4117	NA	NA	NA	NA	NA	NA	NA	NA	NA	NA
4118	NA	NA	NA	NA	NA	NA	NA	NA	NA	NA
4119	NA	NA	NA	NA	NA	NA	NA	NA	NA	NA
4120	NA	NA	NA	NA	NA	NA	NA	NA	NA	NA
4121	NA	NA	NA	NA	NA	NA	NA	NA	NA	NA
4123	NA	NA	NA	NA	NA	NA	NA	NA	NA	NA
4124	NA	NA	NA	NA	NA	NA	NA	NA	NA	NA
4127	NA	NA	NA	NA	NA	NA	NA	NA	NA	NA
4128	NA	NA	NA	NA	NA	NA	NA	NA	NA	NA
4129	NA	NA	NA	NA	NA	NA	NA	NA	NA	NA
4130	NA	NA	NA	NA	NA	NA	NA	NA	NA	NA
4131	NA	NA	NA	NA	NA	NA	NA	NA	NA	NA
4132	NA	NA	NA	NA	NA	NA	NA	NA	NA	NA
4133	NA	NA	NA	NA	NA	NA	NA	NA	NA	NA
4134	NA	NA	NA	NA	NA	NA	NA	NA	NA	NA
4135	NA	NA	NA	NA	NA	NA	NA	NA	NA	NA
4137	NA	NA	NA	NA	NA	NA	NA	NA	NA	NA
4138	NA	NA	NA	NA	NA	NA	NA	NA	NA	NA
4139	NA	NA	NA	NA	NA	NA	NA	NA	NA	NA
4140	NA	NA	NA	NA	NA	NA	NA	NA	NA	NA
4145	NA	NA	NA	NA	NA	NA	NA	NA	NA	NA
4146	NA	NA	NA	NA	NA	NA	NA	NA	NA	NA
4147	NA	NA	NA	NA	NA	NA	NA	NA	NA	NA
4148	NA	NA	NA	NA	NA	NA	NA	NA	NA	NA
4149	NA	NA	NA	NA	NA	NA	NA	NA	NA	NA
4151	NA	NA	NA	NA	NA	NA	NA	NA	NA	NA
4153	NA	NA	NA	NA	NA	NA	NA	NA	NA	NA
4154	NA	NA	NA	NA	NA	NA	NA	NA	NA	NA
4155	NA	NA	NA	NA	NA	NA	NA	NA	NA	NA
4156	NA	NA	NA	NA	NA	NA	NA	NA	NA	NA
4157	NA	NA	NA	NA	NA	NA	NA	NA	NA	NA
4158	NA	NA	NA	NA	NA	NA	NA	NA	NA	NA
4159	NA	NA	NA	NA	NA	NA	NA	NA	NA	NA
4161	NA	NA	NA	NA	NA	NA	NA	NA	NA	NA
4162	NA	NA	NA	NA	NA	NA	NA	NA	NA	NA
4164	NA	NA	NA	NA	NA	NA	NA	NA	NA	NA
4171	NA	NA	NA	NA	NA	NA	NA	NA	NA	NA
4172	NA	NA	NA	NA	NA	NA	NA	NA	NA	NA
4173	NA	NA	NA	NA	NA	NA	NA	NA	NA	NA
4174	NA	NA	NA	NA	NA	NA	NA	NA	NA	NA
4176	NA	NA	NA	NA	NA	NA	NA	NA	NA	NA
4177	NA	NA	NA	NA	NA	NA	NA	NA	NA	NA
4178	NA	NA	NA	NA	NA	NA	NA	NA	NA	NA
4179	NA	NA	NA	NA	NA	NA	NA	NA	NA	NA
4180	NA	NA	NA	NA	NA	NA	NA	NA	NA	NA
4181	NA	NA	NA	NA	NA	NA	NA	NA	NA	NA
4182	NA	NA	NA	NA	NA	NA	NA	NA	NA	NA
4183	NA	NA	NA	NA	NA	NA	NA	NA	NA	NA
4186	NA	NA	NA	NA	NA	NA	NA	NA	NA	NA
